# Supplementary material for: Effect of tree nuts on metabolic syndrome criteria: a systematic review and meta-analysis of randomised controlled trials
Source: PubMed Central journal article supplement — BMJ Open. 2014 Jul 24;4(7):e004660. doi: 10.1136/bmjopen-2013-004660 (PMC4120343; doi:10.1136/bmjopen-2013-004660), 2014-07-24
Supplement: bmjopen-2013-004660.draft_revisions.pdf [file bmjopen-2013-004660.draft_revisions.pdf]

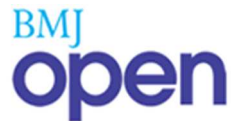

**EFFECT OF TREE NUTS ON METABOLIC SYNDROME  
CRITERIA: A SYSTEMATIC REVIEW AND META-ANALYSIS OF  
RANDOMIZED CONTROLLED TRIALS**

|                                 |                                                                                                                                                                                                                                                                                                                                                                                                                                                                                                                                                                                                                                                                                                                                                                                                                                                                                                                                                                                                                                                                                                                                                                                                                                                                                                                                                                                                                                                                                                                                                                                                                                                                                                                                                                                                                                                                                                                                                                                                                                                                   |
|---------------------------------|-------------------------------------------------------------------------------------------------------------------------------------------------------------------------------------------------------------------------------------------------------------------------------------------------------------------------------------------------------------------------------------------------------------------------------------------------------------------------------------------------------------------------------------------------------------------------------------------------------------------------------------------------------------------------------------------------------------------------------------------------------------------------------------------------------------------------------------------------------------------------------------------------------------------------------------------------------------------------------------------------------------------------------------------------------------------------------------------------------------------------------------------------------------------------------------------------------------------------------------------------------------------------------------------------------------------------------------------------------------------------------------------------------------------------------------------------------------------------------------------------------------------------------------------------------------------------------------------------------------------------------------------------------------------------------------------------------------------------------------------------------------------------------------------------------------------------------------------------------------------------------------------------------------------------------------------------------------------------------------------------------------------------------------------------------------------|
| Journal:                        | <i>BMJ Open</i>                                                                                                                                                                                                                                                                                                                                                                                                                                                                                                                                                                                                                                                                                                                                                                                                                                                                                                                                                                                                                                                                                                                                                                                                                                                                                                                                                                                                                                                                                                                                                                                                                                                                                                                                                                                                                                                                                                                                                                                                                                                   |
| Manuscript ID:                  | bmjopen-2013-004660                                                                                                                                                                                                                                                                                                                                                                                                                                                                                                                                                                                                                                                                                                                                                                                                                                                                                                                                                                                                                                                                                                                                                                                                                                                                                                                                                                                                                                                                                                                                                                                                                                                                                                                                                                                                                                                                                                                                                                                                                                               |
| Article Type:                   | Research                                                                                                                                                                                                                                                                                                                                                                                                                                                                                                                                                                                                                                                                                                                                                                                                                                                                                                                                                                                                                                                                                                                                                                                                                                                                                                                                                                                                                                                                                                                                                                                                                                                                                                                                                                                                                                                                                                                                                                                                                                                          |
| Date Submitted by the Author:   | 10-Dec-2013                                                                                                                                                                                                                                                                                                                                                                                                                                                                                                                                                                                                                                                                                                                                                                                                                                                                                                                                                                                                                                                                                                                                                                                                                                                                                                                                                                                                                                                                                                                                                                                                                                                                                                                                                                                                                                                                                                                                                                                                                                                       |
| Complete List of Authors:       | <p>Blanco Mejia, Sonia; University of Toronto, Department of Nutritional Sciences; St. Michael's Hospital, Toronto 3D Knowledge Synthesis and Clinical Trials Unit</p> <p>Jenkins, David; University of Toronto, Department of Nutritional Sciences; University of Saskatchewan, College of Pharmacy and Nutrition</p> <p>Vigiliouk, Effie; University of Toronto, Department of Nutritional Sciences; St. Michael's Hospital, Toronto 3D Knowledge Synthesis and Clinical Trials Unit</p> <p>Augustin, Livia; University of Toronto, Department of Nutritional Sciences; St. Michael's Hospital, Clinical Nutrition and Risk Factor Modification Centre</p> <p>Ha, Vanessa; University of Toronto, Department of Nutritional Sciences; St. Michael's Hospital, Toronto 3D Knowledge Synthesis and Clinical Trials Unit</p> <p>Cozma, Adrian; University of Toronto, Department of Nutritional Sciences; St. Michael's Hospital, Toronto 3D Knowledge Synthesis and Clinical Trials Unit</p> <p>Mirrahimi, Arash; University of Toronto, Department of Nutritional Sciences; St. Michael's Hospital, Toronto 3D Knowledge Synthesis and Clinical Trials Unit</p> <p>Maroleanu, Adriana; St. Michael's Hospital, Toronto 3D Knowledge Synthesis and Clinical Trials Unit</p> <p>Chiavaroli, Laura; University of Toronto, Department of Nutritional Sciences; St. Michael's Hospital, Toronto 3D Knowledge Synthesis and Clinical Trials Unit</p> <p>Leiter, Lawrence; St. Michael's Hospital, Endocrinology; University of Toronto, Department of Nutritional Sciences</p> <p>de Souza, Russell; McMaster University, Clinical Epidemiology &amp; Biostatistics; University of Toronto, Department of Nutritional Sciences</p> <p>Jenkins, David; University of Toronto, Nutritional Sciences; St. Michael's Hospital, Clinical Nutrition &amp; Risk Factor Modification Center</p> <p>Sievenpiper, John; McMaster University, Department of Pathology and Molecular Medicine; St. Michael's Hospital, Clinical Nutrition and Risk Factor Modification Centre</p> |
| <b>Primary Subject Heading</b>: | Nutrition and metabolism                                                                                                                                                                                                                                                                                                                                                                                                                                                                                                                                                                                                                                                                                                                                                                                                                                                                                                                                                                                                                                                                                                                                                                                                                                                                                                                                                                                                                                                                                                                                                                                                                                                                                                                                                                                                                                                                                                                                                                                                                                          |
| Secondary Subject Heading:      | Nutrition and metabolism, Diabetes and endocrinology                                                                                                                                                                                                                                                                                                                                                                                                                                                                                                                                                                                                                                                                                                                                                                                                                                                                                                                                                                                                                                                                                                                                                                                                                                                                                                                                                                                                                                                                                                                                                                                                                                                                                                                                                                                                                                                                                                                                                                                                              |
| Keywords:                       | Lipid disorders < DIABETES & ENDOCRINOLOGY, Diabetes & endocrinology                                                                                                                                                                                                                                                                                                                                                                                                                                                                                                                                                                                                                                                                                                                                                                                                                                                                                                                                                                                                                                                                                                                                                                                                                                                                                                                                                                                                                                                                                                                                                                                                                                                                                                                                                                                                                                                                                                                                                                                              |

1  
2  
3  
4  
5  
6  
7  
8  
9  
10  
11  
12  
13  
14  
15  
16  
17  
18  
19  
20  
21  
22  
23  
24  
25  
26  
27  
28  
29  
30  
31  
32  
33  
34  
35  
36  
37  
38  
39  
40  
41  
42  
43  
44  
45  
46  
47  
48  
49  
50  
51  
52  
53  
54  
55  
56  
57  
58  
59  
60

|  |                                            |
|--|--------------------------------------------|
|  | < INTERNAL MEDICINE, NUTRITION & DIETETICS |
|  |                                            |

SCHOLARONE™  
Manuscripts

For peer review only

1  
2  
3 1 **EFFECT OF TREE NUTS ON METABOLIC SYNDROME CRITERIA: A**  
4 2 **SYSTEMATIC REVIEW AND META-ANALYSIS OF RANDOMIZED CONTROLLED**  
5 3 **TRIALS**  
6  
7  
8  
9

10 5 **Running Title:** Tree Nuts and Metabolic Syndrome  
11 6

12 7 **Sonia Blanco Mejia MD<sup>123</sup>, Cyril WC Kendall PhD<sup>1234</sup>, Effie Viguiliouk HBSc<sup>123</sup>, Livia S**  
13 8 **Augustin PhD<sup>123</sup>, Vanessa Ha MSc<sup>123</sup>, Adrian Cozma HBSc<sup>123</sup>, Arash Mirrahimi MSc<sup>123</sup>,**  
14 9 **Adriana Maroleanu BPH<sup>3</sup>, Laura Chiavaroli MSc<sup>123</sup>, Lawrence A Leiter MD<sup>123567</sup>, Russell**  
15 10 **J de Souza ScD RD<sup>1238</sup>, David JA Jenkins MD PhD DSc<sup>123567</sup>, John L Sievenpiper MD**  
16 11 **PhD<sup>239</sup>.**  
17  
18  
19  
20  
21

22 13 <sup>1</sup>Department of Nutritional Sciences Faculty of Medicine, University of Toronto, Toronto,  
23 14 Canada, <sup>2</sup>Clinical Nutrition and Risk Factor Modification Centre, St. Michael's Hospital,  
24 15 Toronto, Canada, <sup>3</sup>Toronto 3D Knowledge Synthesis and Clinical Trials Unit, St. Michael's  
25 16 Hospital, Toronto, Canada, <sup>4</sup>College of Pharmacy and Nutrition, University of Saskatchewan,  
26 17 Saskatoon, Saskatchewan, Canada, <sup>5</sup>Keenan Research Center of the Li Ka Shing  
27 18 Knowledge Institute, St. Michael's Hospital, Toronto, Canada, <sup>6</sup>Division of Endocrinology, St.  
28 19 Michael's Hospital, Toronto, Canada, <sup>7</sup>Department of Medicine Faculty of Medicine,  
29 20 University of Toronto, Toronto, Canada, <sup>8</sup>Department of Clinical Epidemiology &  
30 21 Biostatistics, Faculty of Health Sciences, McMaster University, Hamilton, Canada,  
31 22 <sup>9</sup>Department of Pathology and Molecular Medicine Faculty of Health Sciences, McMaster  
32 23 University, Hamilton, Canada.  
33  
34  
35  
36  
37  
38  
39  
40  
41  
42

43 26 **Corresponding author:**

44 27 [Dr. Cyril Kendall](#)

45 28 Department of Nutritional Sciences Faculty of Medicine, University of Toronto, Toronto, ON,  
46 29 Canada. [cyril.kendall@utoronto.ca](mailto:cyril.kendall@utoronto.ca)  
47  
48

49 31 **Text word count:** 4592

50 32 **Abstract Word Count:** 281

51 33 **Tables:** 1

52 34 **Figures:** 2

53 35 **References:** 74

54 36 **Appendices:** 3 Tables & 11 Figures  
55  
56  
57  
58  
59  
60

**ABSTRACT**

**Background:** Chronic disease guidelines support tree nut consumption alone or as part of the Mediterranean, Dietary Approaches to Stop Hypertension (DASH), or Portfolio dietary patterns to reduce cardiovascular risk, based on their favourable LDL-C lowering effect. The effects of nuts on metabolic risk factors other than LDL-C, however, remain uncertain. We conducted a systematic review and meta-analysis of the effect of tree nuts on criteria metabolic syndrome components to provide a broader evidence summary to inform dietary guidelines.

**Methods:** We searched MEDLINE, EMBASE, CINAHL, and the Cochrane Library (through March 19, 2013). We included relevant randomized controlled trials (RCTs) of  $\geq 3$  weeks reporting at least 1 criterion of metabolic syndrome. Two or more independent reviewers extracted all relevant data. Data were pooled using the generic inverse variance method using random effects models and expressed as mean differences (MD) with 95% confidence intervals (CI). Heterogeneity was assessed by  $\text{Chi}^2$  and quantified by  $I^2$ . Study quality was assessed.

**Results:** Eligibility criteria were met by 39 RCTs including 1,676 participants who were otherwise healthy or had dyslipidemia, metabolic syndrome or diabetes mellitus. Tree nut interventions lowered triglycerides compared with control diet interventions (MD = -0.07 mmol/L [95% CI, -0.11, -0.04 mmol/L]), but had no effects on waist circumference, HDL-C, blood pressure, or fasting blood glucose with the direction of effect favouring tree nuts for all except HDL-C.

**Limitations:** Most of the trials were of short duration (<12 weeks) and of poor quality (MQS < 8). Substantial unexplained heterogeneity remained in most analyses.

**Conclusion:** Pooled analyses show a net benefit of tree nuts for metabolic syndrome with decreases in triglycerides across nut types and no adverse effects on other criteria. Longer and higher quality trials are needed.

**Protocol Registration:** ClinicalTrials.gov identifier, NCT01630980



1  
2  
3 65 **Key words:** systematic review, meta-analysis, randomized trials, tree nuts, metabolic  
4  
5 66 syndrome.

6  
7 67 **Strengths and limitations of this study**

- 8  
9 68 • This is the first systematic review and meta-analysis to look at the effect of tree nuts  
10  
11 69 on metabolic syndrome criteria.  
12  
13 70 • This systematic review and meta-analysis involved a large number of trials (36  
14  
15 71 RCTs) in participants with a range of metabolic conditions.  
16  
17 72 • Most of the trials (69.4%) were of low quality (MQS<8).  
18  
19 73 • Most of the trials (66.7%) were of short duration (<12 weeks).  
20  
21 74 • Substantial inter-study heterogeneity remained unexplained.  
22  
23  
24  
25  
26 76

## INTRODUCTION

Dietary patterns including tree nuts have received particular attention for their cardiovascular benefits, and the Food and Drug Administration (FDA) have granted a qualified health claim to tree nuts for cardiovascular risk reduction.<sup>1</sup> General dietary guidelines<sup>2</sup> and heart health guidelines<sup>3 4</sup> also continue to recommend tree nuts alone or as part of the Mediterranean, Portfolio, and Dietary Approaches to Stop Hypertension (DASH) dietary patterns for cardiovascular disease prevention and management.

Although these recommendations are based primarily on the LDL-C lowering benefits of tree nuts, the cardiovascular risk reduction seen with tree nuts is beyond that which would be predicted by this effect alone. The Prevención con Dieta Mediterránea (PREDIMED) trial showed that despite no significant effect on LDL-C early on in the trial<sup>5</sup> a Mediterranean diet supplemented with mixed nuts (30g/day) compared with a low-fat control diet reduced major cardiovascular events by 30% in high cardiovascular risk participants.<sup>6</sup> Nut consumption of >3 servings/week was also associated with other metabolic advantages such as a decreased risk of obesity, MetS, and diabetes.<sup>7</sup> Individual large trials of tree nuts have also shown that nuts improve criteria of the metabolic syndrome: waist circumference,<sup>8 9</sup> triglycerides,<sup>5 10-12</sup> HDL-C,<sup>13-18</sup> blood pressure<sup>5 8</sup> and glycemic control.<sup>19-22</sup>

The overall evidence for these additional metabolic benefits, however, remains uncertain. Guidelines have not recommended tree nuts directly for managing these risk factors. Although the Canadian Diabetes Association 2013 clinical practice guidelines for nutrition therapy<sup>23</sup> did acknowledge some of these metabolic benefits, the evidence was deemed insufficient for making a recommendation. Tree nut consumption was recommended only in so far as part of Mediterranean or DASH dietary patterns.<sup>23</sup> To synthesize the evidence on which recommendations are based for the metabolic benefits of tree nuts beyond LDL-C lowering, we conducted a systematic review and meta-analysis of randomized controlled dietary trials of the effect of tree nuts on criteria of the metabolic syndrome.

## METHODS

### Protocol and Registration

We followed the guidelines of the Cochrane Handbook for Systematic Reviews of Intervention for the planning and conduct of this meta-analysis.<sup>24</sup> Reporting of results followed the Preferred Reporting Items for Systematic Reviews and Meta-Analyses (PRISMA) guidelines.<sup>25</sup> The review protocol is available at ClinicalTrials.gov (registration number: NCT01630980).

### Study Selection

We searched MEDLINE, EMBASE, CINAHL, and the Cochrane Library (through March 19, 2013) to identify randomized controlled dietary trials of tree nuts. Details of the search strategy are presented in **Appendix Table 1**. The electronic database searches were supplemented by manual searches of the reference list of included trials and reviews. No language restriction was used.

We included randomized dietary trials that reported the effect of diets rich in tree nuts (almonds, Brazil nuts, cashews, hazelnuts, macadamia nuts, pecans, pine nuts, pistachios, walnuts and mixed nuts)<sup>1</sup> as a whole compared to diets without tree nuts, but matched for energy, on at least 1 of the 5 criteria of the MetS: waist circumference, triglycerides, high-density lipoprotein cholesterol (HDL-C), blood pressure and fasting blood glucose. Included trials were  $\geq 3$  weeks duration, a duration that satisfies the minimum follow-up requirement for lipid-lowering health claims by the FDA used in the scientific evaluation of lipid-lowering health claims.<sup>26</sup> We excluded trials that incorporated tree nuts as paste, oil or skin nuts into the treatment diets and also those trials that added tree nuts as part of a dietary pattern and did not have a matched control group. The former exclusion intended to eliminate contamination from the other nutritional aspects, and to isolate the effect of tree nuts. Where multiple intervention or control groups were presented, we only included those groups which allowed us to isolate the effect of tree nuts. When multiple publications existed for the same trial, data from the most recent report were included. Publications including additional

1  
2  
3 133 relevant data were used as companion reports. The MetS endpoints were selected  
4  
5 134 according to the 2009 harmonized definition for MetS.<sup>27</sup>  
6

7 135

### 9 136 **Data Extraction**

10  
11 137 Studies that met the inclusion criteria were extracted in full by 2 independent  
12  
13 138 reviewers (SBM and one of EV, LSA, VH or AM) for study characteristics and data for  
14  
15 139 endpoints. Study characteristics included: study design (crossover or parallel), participant  
16  
17 140 characteristics, comparator, nut dose, nut type, duration of follow-up, dietary adherence  
18  
19 141 measures, macronutrient profile, statistical analysis and funding sources. All disagreements  
20  
21 142 amongst reviewers were resolved by consensus.  
22

23 143 The Heyland Methodological Quality Score (MQS) was used for assessment of study  
24  
25 144 quality.<sup>28</sup> Scores from 0-2 points were given for each of the following evaluated criteria:  
26  
27 145 methods (randomization, blinding and analysis), sample (selection, compatibility and follow-  
28  
29 146 up), and intervention (protocol, co-intervention and crossovers). This scale gave a maximum  
30  
31 147 MQS of 13 points. Studies with a score of  $\geq 8$  were considered of high quality.  
32

33 148 The Cochrane Collaboration Risk of Bias Tool was used to assess the study risk of  
34  
35 149 bias.<sup>24</sup> Trials were classified as “unclear risk of bias” when insufficient information was  
36  
37 150 provided to permit judgment, “high risk of bias” when the methodological flaw was likely to  
38  
39 151 have affected the true outcome and “low risk of bias” when a methodological flaw was  
40  
41 152 deemed inconsequential to determine the true effect within a study. As blinding of  
42  
43 153 participants in dietary trials is difficult to achieve, we scored the trials based on the intensity  
44  
45 154 of the dietary advice given to the randomized groups. If treatment intensity was judged to be  
46  
47 155 more intensive in one intervention over another, then trials were classified as “high risk”. If  
48  
49 156 both interventions were emphasized equally, then trials were classified as “low risk of bias”.  
50

51  
52 157 Means (SD) for baseline values, end values, change-from baseline differences, end-  
53  
54 158 differences, and mean differences were recorded for primary endpoints (waist  
55  
56 159 circumference, triglycerides, HDL-C, blood pressure and fasting blood glucose). Reported t-  
57  
58 160 values or F-statistics, and p-values for differences were also recorded. Missing information  
59  
60

1  
2  
3 161 for any endpoint data or study details were requested directly from authors. Where SDs were  
4  
5 162 not reported or given directly by authors, we attempted to calculate these missing SDs from  
6  
7 163 the available statistics using methods recommended by the Cochrane Collaboration.<sup>24</sup> If this  
8  
9 164 was not possible, then we imputed these missing SDs using a pooled correlation coefficient  
10  
11 165 derived from a meta-analysis of correlation coefficients from those trials reporting sufficient  
12  
13 166 data.<sup>24</sup> These correlation coefficients were then transformed into z-scores  $\pm$  and meta-  
14  
15 167 analyzed using inverse-variance weighing. The pooled effect estimate from the z-scores was  
16  
17 168 then back transformed to impute the missing SDs. We used a derived pooled correlation  
18  
19 169 coefficient of 0.664 for triglycerides, 0.903 for HDL-C, 0.282 for systolic blood pressure,  
20  
21 170 0.604 for diastolic blood pressure and 0.658 for fasting blood glucose.  
22  
23 171

## 172 **Statistical Analyses**

173 Data were analyzed using Review Manager (RevMan) 5.2 (The Nordic Cochrane  
174 Centre, The Cochrane Collaboration, Copenhagen, Denmark)<sup>29</sup> for primary analyses and  
175 Stata (version 12, College Station, USA)<sup>30</sup> for subgroup analyses. Pooled analyses were  
176 conducted using the Generic Inverse Variance method with random effects models. Data  
177 were expressed as mean differences (MD) with 95% CI and considered significant at  
178  $P < 0.05$ . Paired analyses were applied to all crossover trials.<sup>31</sup> In cases where there were  
179 multiple intervention or control groups, we combined either intervention or control groups to  
180 create single pairwise comparisons with the aim of diminishing the unit-of-analysis error.<sup>24</sup>

181 The presence of between-studies-heterogeneity was assessed (Cochran Q-statistic;  
182 significant at  $P < 0.10$ ) and quantified ( $I^2$ ). An  $I^2 \geq 50\%$  indicated "substantial" heterogeneity  
183 and  $\geq 75\%$  indicated "considerable" heterogeneity.<sup>24</sup> Analyses were stratified by participant  
184 health status: otherwise healthy, dyslipidemia, MetS criteria and type 2 diabetes based on  
185 trial entry criteria. Sources of heterogeneity were explored using sensitivity analyses and *a*  
186 *priori* subgroup analyses for baseline values (according to MetS diagnostic criteria<sup>27</sup>),  
187 absolute fiber intake (treatment diet  $< 25$  g/d vs.  $\geq 25$  g/d<sup>23</sup> and change in [within and between  
188 the diets]), absolute saturated fatty acid (SFA) intake (treatment diet  $< 7\%$  vs.  $\geq 7\%$  of total

1  
2  
3 189 energy<sup>23</sup> and change in [within and between the diets]), tree nut dose (<50 vs. ≥50 g/day),  
4  
5 190 tree nut type (almonds, Brazil nuts, cashews, hazelnuts, macadamia nuts, pecans, pine nuts,  
6  
7 191 pistachios, walnuts and mixed nuts), duration of follow-up (3< vs. ≥3 months), study design  
8  
9 192 (crossover vs. parallel), and study quality (MQS <8 vs. ≥8). *Post-hoc* subgroup analyses  
10  
11 193 were conducted for the difference in percent carbohydrate intake between the control and  
12  
13 194 intervention arm (carbohydrate displacement). The significance of between-subgroup  
14  
15 195 differences were assessed using meta-regression ( $P < 0.05$ ). To determine if any single trial  
16  
17 196 exerted an undue influence on the overall results, sensitivity analyses were performed, in  
18  
19 197 which each individual trial was removed from the meta-analysis, and the effect size re-  
20  
21 198 calculated with the remaining trials. Publication bias was assessed by visual inspection of  
22  
23 199 funnel plots and formally complemented by Begg's and Egger's tests.  
24  
25  
26  
27

## 28 RESULTS

### 29 Trial Selection

30  
31 **Figure 1** shows flow of studies through the search and selection process. We  
32  
33 204 identified a total of 2,190 reports, from which 701 reports were duplicates and 1,367 reports  
34  
35 205 were deemed irrelevant (determined by review of title and abstract). The remaining 120  
36  
37 206 reports were reviewed in full, of which 81 reports were excluded for not meeting inclusion  
38  
39 207 criteria. A total of 39 reports on 38 trials<sup>8-22 32-52</sup> as well as 3 companion reports<sup>53-55</sup> that  
40  
41 208 addressed at least one criterion of the metabolic syndrome (waist circumference (12 trials,  
42  
43 209  $n=813$ ), triglycerides (37 trials,  $n=1,515$ ), HDL-C (36 trials,  $n=1,607$ ), blood pressure (16  
44  
45 210 trials,  $n=955$ ), and fasting blood glucose (18 trials,  $n=957$ ) were included).  
46  
47  
48  
49

### 50 Trial Characteristics

51  
52 **Table 1** presents characteristics of the included trials. There were 38 trials  
53  
54 214 involving 38 comparisons in 1706 participants. Eleven trials (30.6%)<sup>10 12 14 16 32 34 36 41 45</sup>  
55  
56 215 <sup>51</sup> reported otherwise healthy participants. Two of these trials contained a minority of  
57  
58 216 participants with dyslipidemia who had been classified as otherwise healthy<sup>38 45</sup>. Nine trials  
59  
60

1  
2  
3 217 (25%)<sup>8 18-21 37 39 46 47</sup> were conducted in participants with type 2 diabetes or a mix of patients  
4  
5 218 with overweight and type 2 diabetes in one case<sup>8</sup>. The remaining trials were conducted in  
6  
7 219 people with dyslipidemia (8 trials [22.2%]<sup>13 15 17 33 35 40 43 44</sup>), or with criteria of MetS (8 trials  
8  
9 220 [22.2%]:overweight 3 trials<sup>9 11 52</sup>, full MetS [4 trials<sup>22 42 49 50</sup>], and prediabetes [1  
10  
11 221 trial<sup>48</sup>]).Median age for participants was 50.2 years (IQR:43.7 to 55.5 years). Median body  
12  
13 222 weight for participants was 81.7 kg (IQR: 72.1 to 95.3 kg).

14  
15 223 Most trials (19[52.8%]) were conducted in the United States of America. The rest  
16  
17 224 were conducted in various countries: 3 trials (8.3%) in Australia; 2 trials (5.6%) each in  
18  
19 225 Canada, Spain, Iran, and New Zealand; and 1 trial (2.8%) each in Japan, Turkey, Italy,  
20  
21 226 China, Taiwan and South Africa. A similar number of trials used parallel (19trials [52.8%])  
22  
23 227 and crossover (17 trials [47.2%]) designs. All trials were conducted in an outpatient setting.

24  
25 228 Control diets included usual diets, (8 trials, 22.2%), a National Cholesterol Education  
26  
27 229 Program (NCEP) step 1 diet (5 trials, 13.9%), an average American Diet (3 trials, 8.3%), a  
28  
29 230 low fat diet (2 trials, 5.6%), among others. Twenty-two trials (61%) provided test food  
30  
31 231 supplements, 11 trials (31%) provided all study foods under metabolic feeding control  
32  
33 232 conditions, and 3 trials provided dietary advice (8%). Four trials (11.1%) used a control diet  
34  
35 233 in which a muffin or pretzel<sup>11 15 20</sup> or cheese sticks<sup>19</sup> were exchanged for nuts. The test and  
36  
37 234 control diets were matched for energy in all cases; however 2 of the trials<sup>11 52</sup> featured a  
38  
39 235 negative energy balance tree nut diet compared with a matched negative energy balance  
40  
41 236 control diet. Tree nut types included almonds (11 trials, 30.6%), cashews (2 trials, 5.6%),  
42  
43 237 hazelnuts (2 trials, 5.6%), macadamia nuts (3 trials, 8.3%), pecans (2 trials, 5.6%),  
44  
45 238 pistachios (5 trials, 12.8%), walnuts (10 trials, 27.8%), and mixed nuts (2 trials, 5.6%). We  
46  
47 239 were unable to find studies on Brazil nuts or pine nuts. Median nut dose intake was 53 g/d  
48  
49 240 (IQR: 42 to 72.5 g/d). Median follow-up was 7 weeks (IQR 4 to 12 weeks).

50  
51 241 Macronutrient profiles varied across studies and between treatment and control  
52  
53 242 groups, median values reported for carbohydrate intake were 47% (IQR: of 44 to 52.3%) for  
54  
55 243 the treatment group and 50.5% (IQR: 46 to 56.8%) for the control group. Median values for  
56  
57 244 fat intake were 36.5% (IQR: 31.8 to 39%) and 30.5% (IQR: 28.3 to 34.8%) for tree nut and



control group respectively. Median values for protein intake were 16% (IQR: 15 to 18%) and 17% (IQR: 15 to 19%) for tree nut and control group correspondingly.

**Appendix Table 2 and Appendix Figure 1** present the assessment and summary of the risk of bias by using The Heyland MQS and The Cochrane Risk of Bias Tool. The Heyland MQS ranged from 3 to 9. Twenty-five trials (69.4%) were considered to be low quality (MQS <8) and 11 trials (30.6%) high quality (MQS ≥8). The main contributors of low scores were blinding of participants and crossovers between intervention treatments, followed by sample comparability and follow up. The Cochrane Risk of Bias Tool showed that in our study, blinding of participants and personnel was considered mainly “low risk of bias” (blinding of participants and crossovers in our included dietary trials are not feasible) and that a few studies were considered “high risk of bias” due to incomplete outcome data and selective reporting.

Most of the trials reported research funding from an agency 27/36(75%), while others were funded from a combination of agency and industry 5/36(13.9%). One trial (2.8%) was funded exclusively by industry. Three trials<sup>18 40 47</sup> did not report their funding source (8.3%).

### Waist Circumference

**Appendix Figure 2** presents data on the effect of tree nuts on waist circumference. Tree nuts did not significantly decrease waist circumference in the overall analyses (MD, -0.91 cm [95% CI, -1.99, 0.18 cm]) with evidence of significant heterogeneity ( $I^2=65%$ ,  $P<0.001$ ). Stratification by health status failed to demonstrate a significant effect for any of the sub samples. Sensitivity analyses did not alter the results (data not shown).

**Appendix Table 3-A and Appendix Figure 3** present the a priori continuous and categorical subgroup analyses, respectively, for waist circumference. There was evidence of statistically significant effect modification by the difference in SFA intake in the categorical subgroup analyses ( $P<0.05$ ) and by the difference in carbohydrate intake in the continuous subgroup analyses ( $P<0.05$ ) between tree nut and control interventions. Trials in which tree nuts displaced more SFA leading to larger differences between the tree nut and control



1  
2  
3 273 interventions were more likely to favor the control diet. Trials with lower carbohydrate intakes  
4  
5 274 in the tree nut intervention arms showed larger reductions in waist circumference.

6  
7 275

### 8 9 276 **Triglycerides**

10  
11 277 **Figure 2** presents data on the effect of tree nuts on triglycerides. Tree nuts showed a  
12  
13 278 significant triglyceride-lowering effect (MD, -0.07mmol/L, [95% CI, -0.09, -0.04 mmol/L]) in  
14  
15 279 the overall analysis without evidence of significant heterogeneity ( $I^2=21%$ ,  $P=0.13$ ). The  
16  
17 280 same effect was seen with evidence of significant heterogeneity ( $I^2=48%$ ,  $P=0.03$ ) in the  
18  
19 281 subsample of participants who were otherwise healthy (MD, -0.07 mmol/L [95% CI, -0.11, -  
20  
21 282 0.04 mmol/L]) and without evidence of heterogeneity in the subsample of participants with  
22  
23 283 MetS criteria (MD, -0.09 mmol/L [95% CI, -0.18, 0.00 mmol/L]). Although the reductions were  
24  
25 284 not statistically significant in people with dyslipidemia or diabetes, they did not significantly  
26  
27 285 differ from the reductions in participants who were otherwise healthy or with MetS.  
28  
29 286 Sensitivity analyses did not alter the results (data not shown).

30  
31 287 **Appendix Table 3-B and Appendix Figure 4** present data from the a priori  
32  
33 288 continuous and categorical subgroup analyses, respectively, for triglycerides. There was  
34  
35 289 significant effect modification by nut type in categorical analyses ( $P<0.05$ ). Pairwise  
36  
37 290 comparisons showed that pecan, walnut, and pistachio interventions all significantly  
38  
39 291 decreased triglycerides more than almond interventions ( $P<0.05$ ). No other subgroup  
40  
41 292 analyses were statistically significant.

42  
43 293

### 44 45 294 **HDL-C**

46  
47 295 **Appendix Figure 5** presents the effect of tree nuts on HDL-C. Tree nuts did not  
48  
49 296 significantly affect HDL-C in the overall analysis (MD, 0.00 mmol/L [95% CI, -0.01, 0.01  
50  
51 297 mmol/L]) with evidence of considerable heterogeneity ( $I^2=87%$ ,  $P=<0.001$ ). Stratification by  
52  
53 298 health status failed to demonstrate a significant effect for any of the subsamples. Sensitivity  
54  
55 299 analyses did not alter the results (data not shown).

1  
2  
3 300 **Appendix Table 3-C and Appendix Figure 6** present the a priori continuous and  
4  
5 301 categorical subgroup analyses, respectively, for HDL-C. None of the subgroup analyses  
6  
7 302 were significant.  
8

9 303

### 10 304 **Blood Pressure**

11  
12  
13 305 **Appendix Figures 7-A and 7-B** present the effect of tree nuts on systolic and  
14  
15 306 diastolic blood pressure, respectively. Tree nuts did not significantly decrease either systolic  
16  
17 307 (MD, -0.24mmHg [95% CI, -1.93, 1.45 mmHg]) or diastolic blood pressure (MD, 0.02mmHg  
18  
19 308 [95% CI, -0.49, 0.54 mmHg]) in the overall analysis with evidence of substantial  
20  
21 309 heterogeneity in the systolic blood pressure analysis ( $I^2=53%$ ,  $P<0.01$ ). Stratification by  
22  
23 310 health status failed to demonstrate an effect for any of the subsamples. Sensitivity analyses  
24  
25 311 did not alter the results (data not shown).  
26

27 312 **Appendix Tables 3D and 3E** present the a priori continuous subgroup analyses and  
28  
29 313 **Appendix Figures 8-A and 8-B** present the a priori categorical subgroup analyses for  
30  
31 314 systolic and diastolic blood pressure, respectively. There was evidence of statistically  
32  
33 315 significant effect modification by fibre intake in both the continuous and categorical subgroup  
34  
35 316 analyses and by the difference in carbohydrate intake in the continuous subgroup analyses,  
36  
37 317 both for systolic blood pressure ( $P<0.05$  and  $P<0.01$  respectively) between tree nut and  
38  
39 318 control interventions. Trials with higher fibre intakes in the tree nut intervention arms showed  
40  
41 319 larger reductions in systolic blood pressure. Trials in which tree nuts displaced more  
42  
43 320 carbohydrates leading to larger differences between the tree nut and control interventions  
44  
45 321 were more likely to favor the Tree nut diet in systolic blood pressure. Change in SFA or fibre  
46  
47 322 intake in the tree nut intervention arms also explained the heterogeneity in the overall  
48  
49 323 analyses reducing the residual- $I^2$  to 0%. No other subgroup analyses were statistically  
50  
51 324 significant for either systolic or diastolic blood pressure.  
52

53 325

### 54 326 **Fasting Blood Glucose**

1  
2  
3 327 **Appendix Figure 9** presents the effect of tree nuts on fasting blood glucose. Tree  
4  
5 328 nuts did not significantly decrease fasting blood glucose in the overall analysis (MD, -0.02  
6  
7 329 mmol/L [95% CI, -0.16, 0.11mmol/L]), with evidence of significant heterogeneity ( $I^2=57\%$ ,  
8  
9 330  $p<0.01$ ). Stratification by health status failed to demonstrate an effect for any of the  
10  
11 331 subsamples. Sensitivity analyses did not alter the results (data not shown).

12  
13 332 **Appendix Table 3-F and Appendix Figure 10** present a priori continuous and  
14  
15 333 categorical subgroup analyses, respectively, for fasting blood glucose. There was evidence  
16  
17 334 that the attained difference in SFA intake between tree nut and control interventions (in both  
18  
19 335 continuous and categorical subgroup analyses ( $P<0.05$ )) influenced the effect of nuts on  
20  
21 336 blood glucose. Trials in which tree nuts displaced less SFA leading to smaller differences in  
22  
23 337 SFA between the tree nut and control interventions were more likely to favor the control diet.  
24  
25  
26

338

### 339 **Publication Bias**

27  
28  
29 340 **Appendix Figure 11** presents the funnel plots for publication bias for each endpoint.  
30  
31 341 Visual inspection of the funnel plots revealed some evidence of asymmetry in several of the  
32  
33 342 endpoints. There were more small trials with larger effect estimates favoring tree nuts than  
34  
35 343 control for waist circumference, which argues that the “small-study” effect was actually not a  
36  
37 344 source of potential bias (i.e. 2 smaller studies that favoured control were published). On the  
38  
39 345 other hand, there were more small trials with larger effect estimates favoring control than  
40  
41 346 tree nuts for triglycerides. Egger’s test confirmed these small study effects for triglycerides  
42  
43 347 ( $P<0.05$ ). No other evidence of small study effects was detected by Egger’s test and Begg’s  
44  
45 348 tests.  
46  
47

349

350

## 350 **DISCUSSION**

51  
52 351 To our knowledge, this is the first systematic review and meta-analysis to look at the  
53  
54 352 effect of tree nuts on criteria of the MetS. Our systematic review and meta-analysis included  
55  
56 353 36 randomized trials in 1691 participants who were otherwise healthy or met MetS criteria,  
57  
58 354 dyslipidemia, or type 2 diabetes. Tree nut consumption at a median dose of ~50g/day was

1  
2  
3 355 found to decrease triglycerides significantly by ~0.07 mmol/L over a median follow-up of 7-  
4  
5 356 weeks. No adverse effects were seen on waist circumference, HDL-C, blood pressure or  
6  
7 357 fasting blood glucose. However the direction of effect favored tree nuts in the case of waist  
8  
9 358 circumference, blood pressure, and fasting blood glucose, suggesting an overall net  
10  
11 359 metabolic benefit.  
12  
13 360

### 15 361 **Results in relation to other studies**

17 362 Our findings of a reduction in triglycerides without the expected reciprocal increase in  
18  
19 363 HDL-C are in accordance with previous evidence. Although Sabate et al<sup>56</sup> did not show a  
20  
21 364 triglyceride lowering effect of nut interventions (nonspecific to tree nuts) in overall pooled  
22  
23 365 analyses in an patient-level meta-analysis of controlled feeding trials, he did show that nut  
24  
25 366 interventions lowered triglycerides when analyses were restricted to a subsample of  
26  
27 367 participants with baseline triglycerides  $\geq 1.7$ mmol/L, without an increase in HDL-C. A  
28  
29 368 triglyceride benefit has also been seen in individual trials and meta-analyses of trials  
30  
31 369 investigating the effect of a Mediterranean dietary pattern containing tree nuts in people with  
32  
33 370 diabetes.<sup>57 58</sup>This triglyceride-lowering effect, however, was accompanied by an HDL-C  
34  
35 371 increasing effect.<sup>57 58</sup>Our findings add to these data by showing a similar triglyceride-lowering  
36  
37 372 effect, especially for walnuts, pistachios, and pecans, in the absence of an HDL-C increasing  
38  
39 373 effect, across all subsamples of participants, without differences in triglycerides by baseline  
40  
41 374 levels. The lipid benefits of tree nuts can be attributed to numerous cardioprotective  
42  
43 375 nutrients.<sup>59</sup> The fibre content and high unsaturated fat content with its ability to displace high  
44  
45 376 glycemic index carbohydrate from the diet and so effect a lower glycemic load diet are likely  
46  
47 377 the main factors in lowering triglycerides.

49 378 The lack of effect we observed on waist circumference reinforces the view that tree  
50  
51 379 nuts do not have an adverse effect on body weight. Dietary guidelines have raised concerns  
52  
53 380 about the potential of tree nuts to contribute to weight gain,<sup>2</sup> owing to their high energy  
54  
55 381 density; however prospective cohort studies and randomized trials have shown the opposite.  
56  
57 382 A pooled analysis of Harvard cohorts showed an increase in one serving per day of nuts was  
58  
59  
60

1  
2  
3 383 associated with significant weight loss.<sup>60</sup> Controlled trials of tree nuts alone or as part of  
4  
5 384 Mediterranean,<sup>57 58 61</sup> Portfolio,<sup>62</sup> or DASH<sup>63</sup> dietary patterns have shown neutral or weight  
6  
7 385 loss effects, and no influence on body fat mass or body fat percentage.<sup>64</sup> Dietary patterns  
8  
9 386 that incorporated nuts have reported weight loss under isocaloric conditions or no weight  
10  
11 387 gain under hypercaloric feeding conditions,<sup>65</sup> perhaps because of themetabolically-available  
12  
13 388 energy from nuts is less than the calculated value, as incomplete digestion of nuts leading to  
14  
15 389 energy excretion in the feces.<sup>66</sup> Our findings further suggest that tree nuts do not have a  
16  
17 390 significant effect on the most metabolically adverse weight gain involving an increase in  
18  
19 391 waist circumference. We observed a tendency for a reduction in waist circumference,  
20  
21 392 especially where nuts displaced high glycemic index carbohydrate to effect a lower-glycemic  
22  
23 393 load diet (as opposed to where tree nuts were used to displace saturated fat). These data  
24  
25 394 suggest that the inclusion of a greater number of long-term trials in which tree nuts are used  
26  
27 395 to displace high-glycemic index carbohydrate to effect a low-glycemic load diet may yet  
28  
29 396 demonstrate a waist circumference benefit in future meta-analyses.

31  
32 397 We were surprised not to see an improvement in blood pressure and fasting blood  
33  
34 398 glucose. Individual trials have shown evidence of improvements in blood pressure<sup>5 8</sup> and  
35  
36 399 other aspects of glycemic control.<sup>19-22</sup> An evidence-based review for the 2013 CDA  
37  
38 400 guidelines also found evidence to support small improvements in overall glycemic control in  
39  
40 401 people with diabetes.<sup>67</sup> A blood pressure-decreasing effect of tree nuts has also been seen  
41  
42 402 in the context of Portfolio<sup>62</sup> and DASH<sup>63 68 69</sup> dietary patterns across a range of participant  
43  
44 403 types. The same is true for improvements in long-term glycemic control as assessed by  
45  
46 404 HbA1c for tree nuts as part of Mediterranean<sup>57 58 61</sup> and DASH<sup>63</sup> dietary patterns in people  
47  
48 405 with diabetes. The inability of tree nuts to decrease fasting blood glucose in our analyses  
49  
50 406 may relate to the proposed displacement mechanism by which tree nuts reduce the glycemic  
51  
52 407 load of the diet, as this mechanism would be expected to improve long-term glycemic control  
53  
54 408 through a reduction in postprandial glycaemia, which was not assessed. As elevated the  
55  
56 409 blood pressure in the metabolic syndrome often relates to the underlying insulin resistance,  
57  
58 410 the lack of effect on BP may also be explained by a lack of trials using tree nuts to displace

1  
2  
3 411 high-glycemic index carbohydrate to decrease the low-glycemic load of the diet (trials taking  
4  
5 412 advantage of this mechanism were more likely to show reductions than trials that did not in  
6  
7 413 subgroup analyses). Alternatively, it may be explained by the need for tree nuts to be  
8  
9 414 combined with the other aspects of a DASH diet, which collectively result in larger amounts  
10  
11 415 of potassium, calcium, magnesium, dietary fibre, and protein.  
12

13 416

### 14 15 417 **Limitations**

16  
17 418 There are some limitations to our work. First, the majority of trials (69.4%) were of  
18  
19 419 low quality (MQS<8). Factors that contributed the most to low quality scores were  
20  
21 420 incomplete outcome data and poor reporting. However, in our a priori subgroup analyses  
22  
23 421 there was no effect modification by study quality. Second, the risk of bias remains uncertain  
24  
25 422 for most of the available trials owing to poor reporting. This point is particularly concerning  
26  
27 423 given that the majority of the trials were conducted after the Consolidated Standards of  
28  
29 424 Reporting Trials (CONSORT) guidelines were first reported in 1993 and published in 1996.<sup>70</sup>  
30  
31 425 Third, the majority of the available trials were <3 months, which is perhaps, too short a time  
32  
33 426 to observe an effect for some outcomes (waist circumference, fasting glucose). This also  
34  
35 427 made it difficult to assess the sustainability of the observed effects over the long term. We  
36  
37 428 did not, however, observe significant effect modification by follow-up in categorical or  
38  
39 429 continuous subgroup analyses for any of the endpoints. Finally, our analyses were  
40  
41 430 complicated by significant unexplained heterogeneity for waist circumference, HDL-C, and  
42  
43 431 fasting blood glucose, which we attempted to accommodate using of random effects models,  
44  
45 432 remains a source of uncertainty in the summary effect estimates for these endpoints.  
46  
47

48 433

### 49 50 434 **Practical Implications**

51  
52 435 Tree nuts are a high-energy food that contain cardioprotective nutrients.<sup>59</sup> Even  
53  
54 436 though the median fat intake (36%) of the tree nut containing diets was above that  
55  
56 437 recommended (20-35%) by dietary guidelines,<sup>23</sup> a beneficial effect was seen when  
57  
58 438 compared to a control diet that tended to meet macronutrient recommendations. The median  
59  
60

1  
2  
3 439 dose of ~50g/day tree nuts can be easily integrated as a snack, into a dietary pattern or as a  
4  
5 440 substitution for animal fats or carbohydrates. No increase in side effects compared with  
6  
7 441 control diets were reported in any of the trials, suggesting diets which emphasize tree nuts  
8  
9 442 are as safe as conventional diets (except in individuals with tree nut allergies).  
10

443

## 444 **Conclusion**

445 In conclusion, our pooled analyses indicate that daily tree nut consumption has an  
446 overall net metabolic benefit, through decreasing triglycerides while preserving waist  
447 circumference, HDL-C, blood pressure and fasting blood glucose in people who are  
448 otherwise healthy or have dyslipidemia, criteria of the MetS, or type 2 diabetes. These data  
449 support recommendations to consume tree nuts alone or as part of heart healthy dietary  
450 patterns such as the Mediterranean, Portfolio, Vegetarian, and DASH as a means for  
451 improving metabolic control.<sup>63 71-74</sup> Our conclusions are limited by the small sizes, short  
452 duration, poor quality of the majority of trials, and the presence of significant unexplained  
453 heterogeneity in our analyses. These limitations highlight the need for larger, longer, high  
454 quality trials. Trials in which tree nuts are used to displace high-glycemic index carbohydrate  
455 to decrease the glycemic load of the diet will be especially relevant to understand the role of  
456 tree nuts in reducing cardiometabolic risk associated with the metabolic syndrome.

457

## 458 **Contributions**

459 **Conception and design:** S Blanco Mejia, CWC Kendall, LS Augustin, JL Sievenpiper.

460 **Analysis or interpretation of the data:** S Blanco Mejia, CWC Kendall, E Vigiouliouk, LS  
461 Augustin, V Ha, A Cozma, A Mirrahimi, A Maroleanu, L Chiavaroli, LA Leiter, RJ de Souza,  
462 DJA Jenkins, JL Sievenpiper.

463 **Drafting of the article:** S Blanco Mejia, JL Sievenpiper.

464 **Critical revision of the article for important intellectual content:** S Blanco Mejia, CWC  
465 Kendall, E Vigiouliouk, LS Augustin, V Ha, A Cozma, A Mirrahimi, A Maroleanu, L Chiavaroli,  
466 LA Leiter, RJ de Souza, DJA Jenkins, JL Sievenpiper.



1  
2  
3 467 **Final approval of the article:** S Blanco Mejia, CWC Kendall, E Viguiouk, LS Augustin, V  
4  
5 468 Ha, A Cozma, A Mirrahimi, A Maroleanu, L Chiavaroli, LA Leiter, RJ de Souza, DJA  
6  
7 469 Jenkins, JL Sievenpiper.

8  
9 470 **Statistical expertise:** RJ de Souza.

10  
11 471 **Obtaining of funding:** CWC Kendall, DJA Jenkins, JL Sievenpiper.

12  
13 472 **Administrative, technical, or logistic support:** CWC Kendall, E Viguiouk, LS Augustin, V  
14  
15 473 Ha, A Cozma, A Mirrahimi, A Maroleanu, L Chiavaroli.

16  
17 474 **Collection and assembly of data:** S Blanco Mejia, E Viguiouk, LS Augustin, V Ha, A  
18  
19 475 Cozma, A Maroleanu.

20  
21 476 **Guarantors:** CWC Kendall and JL Sievenpiper.

22  
23 477

#### 24 25 478 **Transparency declaration**

26  
27 479 The manuscript's guarantors affirms that the manuscript is an honest, accurate, and  
28  
29 480 transparent account of the study being reported; no important aspects of the study have  
30  
31 481 been omitted; and any discrepancies from the study as planned (and, if relevant, registered)  
32  
33 482 have been explained.

34  
35 483

#### 36 37 484 **Acknowledgements**

38  
39 485 This work was supported by the International Tree Nut Council Nutrition Research &  
40  
41 486 Education Foundation (Davis, CA). **VH** and **AC** were funded by Province of Ontario  
42  
43 487 Graduate Scholarships. **AC** was also funded by a Canadian Institutes of Health Research  
44  
45 488 (CIHR)-Fredrick Banting and Charles Best Canada Graduate Scholarship and Banting and  
46  
47 489 Best Diabetes Centre (BBDC)-Novo Nordisk Studentship. **RJdS** was funded by a CIHR  
48  
49 490 Postdoctoral Fellowship Award. **DJAJ** was funded by the Government of Canada through  
50  
51 491 the Canada Research Chair Endowment. None of the sponsors had a role in any aspect of  
52  
53 492 the present study, including design and conduct of the study; collection, management,  
54  
55 493 analysis, and interpretation of the data; and preparation, review, or approval of the  
56  
57 494 manuscript.



1  
2  
3 495 We wish to thank Teruko Kishibe for her help in the development of search terms  
4  
5 496 used.

6  
7 497

8  
9 498 **Exclusive Licence**

10  
11 499 The Corresponding Author on behalf of all authors grants an exclusive licence on a  
12  
13 500 worldwide basis to the BMJ Publishing Group Ltd and its Licensees to permit this article to  
14  
15 501 be published in BMJ editions and any other BMJ PGL products and sublicences to exploit all  
16  
17 502 subsidiary rights, as set out in the licence ([http://resources.bmj.com/bmj/authors/checklists-](http://resources.bmj.com/bmj/authors/checklists-forms/licence-for-publication)  
18  
19 503 [forms/licence-for-publication](http://resources.bmj.com/bmj/authors/checklists-forms/licence-for-publication)).

20  
21 504 **Ethical Approval**

22  
23 505 Not required.

24  
25 506

26  
27 507 **Potential Conflicts of Interest**

28  
29 508 All authors have completed the Unified Competing Interest form at  
30  
31 509 [www.icmje.org/coi\\_disclosure.pdf](http://www.icmje.org/coi_disclosure.pdf) (available on request from the corresponding author) and  
32  
33 510 declare: **SBM, LSA, AC, EV and LAL**, no conflicts of interest related to this paper. **CWCK**  
34  
35 511 has received consultant fees, honoraria, travel funding, or research support from or served  
36  
37 512 on the scientific advisory board for the CIHR, Calorie Control Council, The Coca Cola  
38  
39 513 Company (investigator initiated, unrestricted), Abbott Laboratories, Advanced Food Materials  
40  
41 514 Network, Almond Board of California, American Peanut Council, American Pistachio  
42  
43 515 Growers, Barilla, California Strawberry Commission, Canola Council of Canada, Danone,  
44  
45 516 General Mills, Hain Celestial, International Tree Nut Council, Kellogg, Loblaw Brands Ltd,  
46  
47 517 Oldways, Orafiti, Paramount Farms, Pulse Canada, Saskatchewan Pulse Growers, Solae  
48  
49 518 and Unilever. **VH, AM, LC** have received research support from the Canadian Institutes of  
50  
51 519 health Research (CIHR). **RJdS** has received research support from the Canadian Institutes  
52  
53 520 of Health Research (CIHR), Calorie Control Council, and The Coca-Cola Company  
54  
55 521 (investigator initiated, unrestricted). He has served as an external resource person to the  
56  
57 522 World Health Organization's (WHO) Nutrition Guidelines Advisory Group (NUGAG), and was

1  
2  
3 523 the lead author of systematic reviews and meta-analysis commissioned by the WHO of  
4  
5 524 saturated and trans fatty acids and health outcomes. The WHO paid for his travel and  
6  
7 525 accommodation to attend the 5th NUGAG Meeting in Hangzhou, China (4-7 Mar, 2013), and  
8  
9 526 the 6<sup>th</sup> NUGAG Meeting in Copenhagen, Denmark (21-24 Oct, 2013). **DJAJ** has received  
10  
11 527 consultant fees, honoraria, travel funding, or research support from or served on the  
12  
13 528 scientific advisory board for the CIHR, Canadian Foundation for Innovation (CFI), Ontario  
14  
15 529 Research Fund (ORF), and Advanced Foods and Material Network (AFMNet) Calorie  
16  
17 530 Control Council, The Coca Cola Company (investigator initiated, unrestricted), Barilla, Solae,  
18  
19 531 Unilever, Hain Celestial, Loblaws Supermarkets, Inc., Sanitarium Company, Herbalife  
20  
21 532 International, Pacific Health Laboratories, Inc., Metagenics/MetaProteomics, Bayer  
22  
23 533 Consumer Care, Oldways Preservation Trust, The International Tree Nut Council Nutrition  
24  
25 534 Research & Education, The Peanut Institute, Procter and Gamble Technical Centre Limited,  
26  
27 535 Griffin Hospital for the development of the NuVal System, Soy Advisory Board of Dean  
28  
29 536 Foods, Alpro Soy Foundation, Nutritional Fundamentals for Health, Pacific Health  
30  
31 537 Laboratories, Kellogg's, Quaker Oats, The Coca-Cola Sugar Advisory Board, Pepsi  
32  
33 538 Company, Agrifoods and Agriculture Canada (AAFC), Canadian Agriculture Policy Institute  
34  
35 539 (CAPI), The Almond Board of California, The California Strawberry Commission, Orafiti, the  
36  
37 540 Canola and Flax Councils of Canada, Pulse Canada, the Saskatchewan Pulse Growers, and  
38  
39 541 Abbott Laboratories. **JLS** has received research support from the Canadian Institutes of  
40  
41 542 health Research (CIHR), Calorie Control Council, The Coca-Cola Company (investigator  
42  
43 543 initiated, unrestricted grant), Pulse Canada, and The International Tree Nut Council Nutrition  
44  
45 544 Research & Education Foundation. He has received travel funding, speaker fees, and/or  
46  
47 545 honoraria from the American Heart Association (AHA), American College of Physicians  
48  
49 546 (ACP), American Society for Nutrition (ASN), National Institute of Diabetes and Digestive  
50  
51 547 and Kidney Diseases (NIDDK) of the National Institutes of Health (NIH), Canadian Diabetes  
52  
53 548 Association (CDA), Canadian Nutrition Society (CNS), Calorie Control Council, Diabetes and  
54  
55 549 Nutrition Study Group (DNSG) of the European Association for the Study of Diabetes  
56  
57 550 (EASD), International Life Sciences Institute (ILSI) North America, International Life  
58  
59  
60

1  
2  
3 551 Sciences Institute (ILSI) Brazil, Abbott Laboratories, Pulse Canada, Dr. Pepper Snapple  
4  
5 552 Group, and The Coca-Cola Company. He is on the Clinical Practice Guidelines Expert  
6  
7 553 Committee for Nutrition Therapy of both the Canadian Diabetes Association (CDA) and  
8  
9 554 European Association for the study of Diabetes (EASD), as well as being on the American  
10  
11 555 Society for Nutrition (ASN) writing panel for a scientific statement on the metabolic and  
12  
13 556 nutritional effects of fructose, sucrose and high fructose corn syrup. He is an unpaid  
14  
15 557 scientific advisor for the International Life Science Institute (ILSI) North America, Food,  
16  
17 558 Nutrition, and Safety Program (FNSP). His wife is an employee of Unilever Canada.  
18  
19  
20  
21

559

## 560 **Data Sharing**

561 No additional data available.

562

563

## 564 **Contributorship**

565 Conception and design: S Blanco Mejia, CWC Kendall, LS Augustin, JL Sievenpiper.

566

567 Analysis or interpretation of the data: S Blanco Mejia, CWC Kendall, E Viguiouk, LS Augustin, V Ha, A  
568 Cozma, A Mirrahimi, A Maroleanu, L Chiavaroli, LA Leiter, RJ de Souza, DJA Jenkins, JL Sievenpiper.

569

570 Drafting of the article: S Blanco Mejia, JL Sievenpiper.

571

572 Critical revision of the article for important intellectual content: S Blanco Mejia, CWC Kendall, E  
573 Viguiouk, LS Augustin, V Ha, A Cozma, A Mirrahimi, A Maroleanu, L Chiavaroli, LA Leiter, RJ de  
574 Souza, DJA Jenkins, JL Sievenpiper.

575

576 Final approval of the article: S Blanco Mejia, CWC Kendall, E Viguiouk, LS Augustin, V Ha, A Cozma, A  
577 Mirrahimi, A Maroleanu, L Chiavaroli, LA Leiter, RJ de Souza, DJA Jenkins, JL Sievenpiper.

578

579 Statistical expertise: RJ de Souza.

580

581 Obtaining of funding: CWC Kendall, DJA Jenkins, JL Sievenpiper.

582

583 Administrative, technical, or logistic support: CWC Kendall, E Viguiouk, LS Augustin, V Ha, A Cozma,  
584 A Mirrahimi, A Maroleanu, L Chiavaroli.

585

586 Collection and assembly of data: S Blanco Mejia, E Viguiouk, LS Augustin, V Ha, A Cozma, A  
587 Maroleanu.

588

589 Guarantors: CWC Kendall and JL Sievenpiper.

590

591

592

593

594

595

596

597

598

## REFERENCES

1. US Food and Drug Administration. Qualified Health Claims: Letter of Enforcement Discretion - Nuts and Coronary Heart Disease (Docket No 02P-0505), 2003.
2. U.S. Department of Agriculture and U.S. Department of Health and Human Services. Dietary Guidelines for Americans. 7th Edition ed. Washington, DC: US Government Printing Office, 2010.
3. American Heart Association Nutrition C, Lichtenstein AH, Appel LJ, Brands M, Carnethon M, Daniels S, et al. Diet and lifestyle recommendations revision 2006: a scientific statement from the American Heart Association Nutrition Committee. *Circulation* 2006;114(1):82-96.
4. McKelvie RS, Moe GW, Ezekowitz JA, Heckman GA, Costigan J, Ducharme A, et al. The 2012 Canadian Cardiovascular Society heart failure management guidelines update: focus on acute and chronic heart failure. *The Canadian journal of cardiology* 2013;29(2):168-81.
5. Estruch R, Martinez-Gonzalez MA, Corella D, Salas-Salvado J, Ruiz-Gutierrez V, Covas MI, et al. Effects of a Mediterranean-style diet on cardiovascular risk factors: a randomized trial. *Annals of internal medicine* 2006;145(1):1-11.
6. Estruch R, Ros E, Salas-Salvado J, Covas MI, Corella D, Aros F, et al. Primary prevention of cardiovascular disease with a Mediterranean diet. *The New England journal of medicine* 2013;368(14):1279-90.
7. Ibarrola-Jurado N, Bullo M, Guasch-Ferre M, Ros E, Martinez-Gonzalez MA, Corella D, et al. Cross-sectional assessment of nut consumption and obesity, metabolic syndrome and other cardiometabolic risk factors: the PREDIMED study. *PLoS One* 2013;8(2):e57367.
8. Wien MA, Sabate JM, Ikle DN, Cole SE, Kandeel FR. Almonds vs complex carbohydrates in a weight reduction program. *Int J Obes Relat Metab Disord* 2003;27(11):1365-72.
9. Somerset SM, Graham, L., Markwell, K. Isoenergetic replacement of dietary saturated with monounsaturated fat via macadamia nuts enhances endothelial function in overweight subjects: e-SPEN Journal, 2013.
10. Curb JD, Wergowske G, Dobbs JC, Abbott RD, Huang B. Serum lipid effects of a high-monounsaturated fat diet based on macadamia nuts. *Arch Intern Med* 2000;160(8):1154-8.
11. Li Z, Song R, Nguyen C, Zerlin A, Karp H, Naowamondhol K, et al. Pistachio nuts reduce triglycerides and body weight by comparison to refined carbohydrate snack in obese subjects on a 12-week weight loss program. *Journal of the American College of Nutrition* 2010;29(3):198-203.
12. Torabian S, Haddad E, Cordero-MacIntyre Z, Tanzman J, Fernandez ML, Sabate J. Long-term walnut supplementation without dietary advice induces favorable serum lipid changes in free-living individuals. *European Journal of Clinical Nutrition* 2010;64(3):274-9.
13. Chisholm A, Mann J, Skeaff M, Frampton C, Sutherland W, Duncan A, et al. A diet rich in walnuts favourably influences plasma fatty acid profile in moderately hyperlipidaemic subjects. *European Journal of Clinical Nutrition* 1998;52(1):12-6.

14. Rajaram S, Burke K, Connell B, Myint T, Sabate J. A monounsaturated fatty acid-rich pecan-enriched diet favorably alters the serum lipid profile of healthy men and women. *J Nutr* 2001;131(9):2275-9.
15. Jenkins DJ, Kendall CW, Marchie A, Parker TL, Connelly PW, Qian W, et al. Dose response of almonds on coronary heart disease risk factors: blood lipids, oxidized low-density lipoproteins, lipoprotein(a), homocysteine, and pulmonary nitric oxide: a randomized, controlled, crossover trial. *Circulation* 2002;106(11):1327-32.
16. Kocyigit A, Koylu AA, Keles H. Effects of pistachio nuts consumption on plasma lipid profile and oxidative status in healthy volunteers. *Nutr Metab Cardiovasc Dis* 2006;16(3):202-9.
17. Sheridan MJ, Cooper JN, Erario M, Cheifetz CE. Pistachio nut consumption and serum lipid levels. *Journal of the American College of Nutrition* 2007;26(2):141-8.
18. Darvish Damavandi R. The Effects of Cashew Consumption on Serum Glucose, Insulin and Lipoprotein in Type 2 Diabetic Patients. *Iranian Journal of Endocrinology and Metabolism* 2012;14(4):325-34.
19. Cohen AE, Johnston CS. Almond ingestion at mealtime reduces postprandial glycemia and chronic ingestion reduces hemoglobin A(1c) in individuals with well-controlled type 2 diabetes mellitus. *Metabolism: clinical and experimental* 2011;60(9):1312-7.
20. Jenkins DJ, Kendall CW, Banach MS, Srichaikul K, Vidgen E, Mitchell S, et al. Nuts as a replacement for carbohydrates in the diabetic diet. *Diabetes care* 2011;34(8):1706-11.
21. Li SC, Liu YH, Liu JF, Chang WH, Chen CM, Chen CY. Almond consumption improved glycemic control and lipid profiles in patients with type 2 diabetes mellitus. *Metabolism: clinical and experimental* 2011;60(4):474-9.
22. Wang X, Li Z, Liu Y, Lv X, Yang W. Effects of pistachios on body weight in Chinese subjects with metabolic syndrome. *Nutr J* 2012;11:20.
23. Canadian Diabetes Association Clinical Practice Guidelines Expert Committee. Clinical Practice Guidelines Nutrition Therapy. *Can J Diabetes* 2013;37(Supplement 1):S45-S55.
24. Higgins JPaG, Sally. Cochrane Handbook for Systematic Reviews of Interventions. In: collaboration TC, editor, 2011.
25. Graf C, Battisti WP, Bridges D, Bruce-Winkler V, Conaty JM, Ellison JM, et al. Research Methods & Reporting. Good publication practice for communicating company sponsored medical research: the GPP2 guidelines. *Bmj* 2009;339:b4330.
26. US Food and Drug Administration. Guidance for Industry: Evidence-Based Review System for the Scientific Evaluation of Health Claims - Final, 2009.
27. Alberti KG, Eckel RH, Grundy SM, Zimmet PZ, Cleeman JI, Donato KA, et al. Harmonizing the metabolic syndrome: a joint interim statement of the International Diabetes Federation Task Force on Epidemiology and Prevention; National Heart, Lung, and Blood Institute; American Heart Association; World Heart Federation; International Atherosclerosis Society; and International Association for the Study of Obesity. *Circulation* 2009;120(16):1640-5.



- 1
  - 2
  - 3
  - 4
  - 5
  - 6
  - 7
  - 8
  - 9
  - 10
  - 11
  - 12
  - 13
  - 14
  - 15
  - 16
  - 17
  - 18
  - 19
  - 20
  - 21
  - 22
  - 23
  - 24
  - 25
  - 26
  - 27
  - 28
  - 29
  - 30
  - 31
  - 32
  - 33
  - 34
  - 35
  - 36
  - 37
  - 38
  - 39
  - 40
  - 41
  - 42
  - 43
  - 44
  - 45
  - 46
  - 47
  - 48
  - 49
  - 50
  - 51
  - 52
  - 53
  - 54
  - 55
  - 56
  - 57
  - 58
  - 59
  - 60
28. Heyland DK, Novak F, Drover JW, Jain M, Su X, Suchner U. Should immunonutrition become routine in critically ill patients? A systematic review of the evidence. *JAMA : the journal of the American Medical Association* 2001;286(8):944-53.
29. Mari-Anne Gall PH, Knut Borch-Johnsen, Hans-Henrik Parving. Risk factors for development of incipient and overt diabetic nephropathy in patients with non-insulin dependent diabetes mellitus: prospective, observational study. *British Medical Journal* 1997;314:783-8.
30. Stata Statistical Software: Release 12. College Station, TX: StataCorp LP. [program], 2011.
31. Elbourne DR, Altman DG, Higgins JP, Curtin F, Worthington HV, Vail A. Meta-analyses involving cross-over trials: methodological issues. *International journal of epidemiology* 2002;31(1):140-9.
32. Sabate J, Fraser GE, Burke K, Knutsen SF, Bennett H, Lindsted KD. Effects of walnuts on serum lipid levels and blood pressure in normal men. *The New England journal of medicine* 1993;328(9):603-7.
33. Spiller GA, Jenkins DA, Bosello O, Gates JE, Cragen LN, Bruce B. Nuts and plasma lipids: an almond-based diet lowers LDL-C while preserving HDL-C. *Journal of the American College of Nutrition* 1998;17(3):285-90.
34. Morgan WA, Clayshulte BJ. Pecans lower low-density lipoprotein cholesterol in people with normal lipid levels. *J Am Diet Assoc* 2000;100(3):312-8.
35. Zambon D, Sabate J, Munoz S, Campero B, Casals E, Merlos M, et al. Substituting walnuts for monounsaturated fat improves the serum lipid profile of hypercholesterolemic men and women. A randomized crossover trial. *Annals of internal medicine* 2000;132(7):538-46.
36. Iwamoto M, Imaizumi K, Sato M, Hirooka Y, Sakai K, Takeshita A, et al. Serum lipid profiles in Japanese women and men during consumption of walnuts. *European Journal of Clinical Nutrition* 2002;56(7):629-37.
37. Lovejoy JC, Most MM, Lefevre M, Greenway FL, Rood JC. Effect of diets enriched in almonds on insulin action and serum lipids in adults with normal glucose tolerance or type 2 diabetes. *The American journal of clinical nutrition* 2002;76(5):1000-6.
38. Sabate J, Haddad E, Tanzman JS, Jambazian P, Rajaram S. Serum lipid response to the graduated enrichment of a Step I diet with almonds: a randomized feeding trial. *The American journal of clinical nutrition* 2003;77(6):1379-84.
39. Tapsell LC, Gillen LJ, Patch CS, Batterham M, Owen A, Bare M, et al. Including walnuts in a low-fat/modified-fat diet improves HDL cholesterol-to-total cholesterol ratios in patients with type 2 diabetes. *Diabetes care* 2004;27(12):2777-83.
40. Tamizifar B, Rismankarzadeh, M., Vosoughi, A., Pharm, M., Tamizifar B, Aminzade, A. A low-dose almond-based diet decreases LDL-C while preserving HDL-C. *Archives of Iranian Medicine* 2005;8(1):45-51.
41. Kurlandsky SBaS, Kim S. Cardioprotective effects of chocolate and almond consumption in healthy women. *Nutrition Research* 2006;26:509-16.
42. Mukuddem-Petersen J, Stonehouse Oosthuizen W, Jerling JC, Hanekom SM, White Z. Effects of a high walnut and high cashew nut diet on selected markers of the

- 1  
2  
3 metabolic syndrome: a controlled feeding trial. *The British journal of nutrition*  
4 2007;97(6):1144-53.  
5  
6 43. Gebauer SK, West SG, Kay CD, Alaupovic P, Bagshaw D, Kris-Etherton PM.  
7 Effects of pistachios on cardiovascular disease risk factors and potential  
8 mechanisms of action: a dose-response study. *The American journal of clinical*  
9 *nutrition* 2008;88(3):651-9.  
10  
11 44. Griel AE, Cao Y, Bagshaw DD, Cifelli AM, Holub B, Kris-Etherton PM. A macadamia  
12 nut-rich diet reduces total and LDL-cholesterol in mildly hypercholesterolemic  
13 men and women. *J Nutr* 2008;138(4):761-7.  
14  
15 45. Rajaram S, Haddad EH, Mejia A, Sabate J. Walnuts and fatty fish influence different  
16 serum lipid fractions in normal to mildly hyperlipidemic individuals: a randomized  
17 controlled study. *The American journal of clinical nutrition* 2009;89(5):1657S-63S.  
18  
19 46. Tapsell LC, Batterham MJ, Teuss G, Tan SY, Dalton S, Quick CJ, et al. Long-term  
20 effects of increased dietary polyunsaturated fat from walnuts on metabolic  
21 parameters in type II diabetes. *European Journal of Clinical Nutrition*  
22 2009;63(8):1008-15.  
23  
24 47. Ma Y, Njike VY, Millet J, Dutta S, Doughty K, Treu JA, et al. Effects of walnut  
25 consumption on endothelial function in type 2 diabetic subjects: a randomized  
26 controlled crossover trial. *Diabetes care* 2010;33(2):227-32.  
27  
28 48. Wien M, Bleich D, Raghuvanshi M, Gould-Forgerite S, Gomes J, Monahan-Couch  
29 L, et al. Almond consumption and cardiovascular risk factors in adults with  
30 prediabetes. *Journal of the American College of Nutrition* 2010;29(3):189-97.  
31  
32 49. Wu H, Pan A, Yu Z, Qi Q, Lu L, Zhang G, et al. Lifestyle counseling and  
33 supplementation with flaxseed or walnuts influence the management of metabolic  
34 syndrome. *J Nutr* 2010;140(11):1937-42.  
35  
36 50. Casas-Agustench P, Lopez-Uriarte P, Bullo M, Ros E, Cabre-Vila JJ, Salas-Salvado  
37 J. Effects of one serving of mixed nuts on serum lipids, insulin resistance and  
38 inflammatory markers in patients with the metabolic syndrome. *Nutr Metab*  
39 *Cardiovasc Dis* 2011;21(2):126-35.  
40  
41 51. Tey SL, Brown R, Gray A, Chisholm A, Delahunty C. Nuts improve diet quality  
42 compared to other energy-dense snacks while maintaining body weight. *J Nutr*  
43 *Metab* 2011;2011:357350.  
44  
45 52. Foster GD, Shantz KL, Vander Veur SS, Oliver TL, Lent MR, Virus A, et al. A  
46 randomized trial of the effects of an almond-enriched, hypocaloric diet in the  
47 treatment of obesity. *The American journal of clinical nutrition* 2012;96(2):249-54.  
48  
49 53. Schutte AE, Van Rooyen JM, Huisman HW, Mukuddem-Petersen J, Oosthuizen W,  
50 Hanekom SM, et al. Modulation of baroreflex sensitivity by walnuts versus  
51 cashew nuts in subjects with metabolic syndrome. *American journal of*  
52 *hypertension* 2006;19(6):629-36.  
53  
54 54. Jenkins DJ, Kendall CW, Marchie A, Josse AR, Nguyen TH, Faulkner DA, et al.  
55 Almonds reduce biomarkers of lipid peroxidation in older hyperlipidemic subjects.  
56 *J Nutr* 2008;138(5):908-13.  
57  
58 55. West SG, Gebauer SK, Kay CD, Bagshaw DM, Savastano DM, Diefenbach C, et al.  
59 Diets containing pistachios reduce systolic blood pressure and peripheral  
60 vascular responses to stress in adults with dyslipidemia. *Hypertension*  
2012;60(1):58-63.

- 1
- 2
- 3
- 4 56. Sabate J, Oda K, Ros E. Nut consumption and blood lipid levels: a pooled analysis
- 5 of 25 intervention trials. *Arch Intern Med* 2010;170(9):821-7.
- 6
- 7 57. Esposito K, Maiorino MI, Ciotola M, Di Palo C, Scognamiglio P, Gicchino M, et al.
- 8 Effects of a Mediterranean-style diet on the need for antihyperglycemic drug
- 9 therapy in patients with newly diagnosed type 2 diabetes: a randomized trial.
- 10 *Annals of internal medicine* 2009;151(5):306-14.
- 11
- 12 58. Esposito K, Maiorino MI, Ceriello A, Giugliano D. Prevention and control of type 2
- 13 diabetes by Mediterranean diet: a systematic review. *Diabetes research and*
- 14 *clinical practice* 2010;89(2):97-102.
- 15
- 16 59. Kris-Etherton PM, Hu FB, Ros E, Sabate J. The role of tree nuts and peanuts in the
- 17 prevention of coronary heart disease: multiple potential mechanisms. *J Nutr*
- 18 2008;138(9):1746S-51S.
- 19
- 20 60. Mozaffarian D, Capewell S. United Nations' dietary policies to prevent
- 21 cardiovascular disease. *Bmj* 2011;343:d5747.
- 22
- 23 61. Shai I, Schwarzfuchs D, Henkin Y, Shahar DR, Witkow S, Greenberg I, et al. Weight
- 24 loss with a low-carbohydrate, Mediterranean, or low-fat diet. *The New England*
- 25 *journal of medicine* 2008;359(3):229-41.
- 26
- 27 62. Jenkins DJ, Jones PJ, Lamarche B, Kendall CW, Faulkner D, Cermakova L, et al.
- 28 Effect of a dietary portfolio of cholesterol-lowering foods given at 2 levels of
- 29 intensity of dietary advice on serum lipids in hyperlipidemia: a randomized
- 30 controlled trial. *JAMA : the journal of the American Medical Association*
- 31 2011;306(8):831-9.
- 32
- 33 63. Azadbakht L, Fard NR, Karimi M, Baghaei MH, Surkan PJ, Rahimi M, et al. Effects
- 34 of the Dietary Approaches to Stop Hypertension (DASH) eating plan on
- 35 cardiovascular risks among type 2 diabetic patients: a randomized crossover
- 36 clinical trial. *Diabetes care* 2011;34(1):55-7.
- 37
- 38 64. Sabate J, Cordero-Macintyre Z, Siapco G, Torabian S, Haddad E. Does regular
- 39 walnut consumption lead to weight gain? *The British journal of nutrition*
- 40 2005;94(5):859-64.
- 41
- 42 65. Almario RU, Vonghavaravat V, Wong R, Kasim-Karakas SE. Effects of walnut
- 43 consumption on plasma fatty acids and lipoproteins in combined hyperlipidemia.
- 44 *The American journal of clinical nutrition* 2001;74(1):72-9.
- 45
- 46 66. Jenkins DJ, Kendall CW, Popovich DG, Vidgen E, Mehling CC, Vuksan V, et al.
- 47 Effect of a very-high-fiber vegetable, fruit, and nut diet on serum lipids and
- 48 colonic function. *Metabolism: clinical and experimental* 2001;50(4):494-503.
- 49
- 50 67. Dworatzek JLSaPD. Food and Dietary Pattern-Based Recommendations: An
- 51 Emerging Approach to Clinical Practice Guidelines for Nutrition Therapy in
- 52 Diabetes. *Canadian Journal of Diabetes* 2013;37:51-57.
- 53
- 54 68. Appel LJ, Moore TJ, Obarzanek E, Vollmer WM, Svetkey LP, Sacks FM, et al. A
- 55 clinical trial of the effects of dietary patterns on blood pressure. DASH
- 56 Collaborative Research Group. *The New England journal of medicine*
- 57 1997;336(16):1117-24.
- 58
- 59 69. Sacks FM, Svetkey LP, Vollmer WM, Appel LJ, Bray GA, Harsha D, et al. Effects on
- 60 blood pressure of reduced dietary sodium and the Dietary Approaches to Stop
- Hypertension (DASH) diet. DASH-Sodium Collaborative Research Group. *The*
- New England journal of medicine* 2001;344(1):3-10.



- 1  
2  
3  
4  
5  
6  
7  
8  
9  
10  
11  
12  
13  
14  
15  
16  
17  
18  
19  
20  
21  
22  
23  
24  
25  
26  
27  
28  
29  
30  
31  
32  
33  
34  
35  
36  
37  
38  
39  
40  
41  
42  
43  
44  
45  
46  
47  
48  
49  
50  
51  
52  
53  
54  
55  
56  
57  
58  
59  
60
70. Begg C, Cho M, Eastwood S, Horton R, Moher D, Olkin I, et al. Improving the quality of reporting of randomized controlled trials. The CONSORT statement. *JAMA : the journal of the American Medical Association* 1996;276(8):637-9.
71. Barnard ND, Cohen J, Jenkins DJ, Turner-McGrievy G, Gloede L, Green A, et al. A low-fat vegan diet and a conventional diabetes diet in the treatment of type 2 diabetes: a randomized, controlled, 74-wk clinical trial. *The American journal of clinical nutrition* 2009;89(5):1588S-96S.
72. Rizzo NS, Sabate J, Jaceldo-Siegl K, Fraser GE. Vegetarian dietary patterns are associated with a lower risk of metabolic syndrome: the adventist health study 2. *Diabetes care* 2011;34(5):1225-7.
73. Jenkins DJ, Kendall CW, Marchie A, Faulkner D, Vidgen E, Lapsley KG, et al. The effect of combining plant sterols, soy protein, viscous fibers, and almonds in treating hypercholesterolemia. *Metabolism: clinical and experimental* 2003;52(11):1478-83.
74. Jenkins DJ, Kendall CW, Marchie A, Faulkner DA, Wong JM, de Souza R, et al. Direct comparison of a dietary portfolio of cholesterol-lowering foods with a statin in hypercholesterolemic participants. *The American journal of clinical nutrition* 2005;81(2):380-7.

Table 1

| Study, year (Reference)            | Participants                                                             | Mean Age (SD or range), y | Mean Body Weight or BMI (SD or range) <sup>§</sup>     | Setting                                              | Design           | Feeding Control | Nut type | Nuts Dose (g/d) <sup>  </sup> | Comparator | Diet ††                                            | Energy Balance                               | Follow-Up  | MQS <sup>§§</sup> | Funding Sources <sup>   </sup> |                 |
|------------------------------------|--------------------------------------------------------------------------|---------------------------|--------------------------------------------------------|------------------------------------------------------|------------------|-----------------|----------|-------------------------------|------------|----------------------------------------------------|----------------------------------------------|------------|-------------------|--------------------------------|-----------------|
| Sabate et al, 1993 (32)            | Walnut Control                                                           | 18 (18 M)                 | 30                                                     | 73                                                   | OP, USA          | Crossover       | Met      | Walnut                        | 84         | NCEP Step 1 diet                                   | 55:31:14<br>56:30:14                         | Isocaloric | 4 wks             | 6                              | Agency          |
| Chisholm et al, 1998 (13)          | Walnut Control                                                           | 16 HLP                    | 45 (6.8)                                               | 28.4 (4.3)                                           | OP, New Zealand  | Crossover       | DA       | Walnut                        | 78         | Low Fat Diet                                       | 40:38:17<br>46:30:19                         | Isocaloric | 4 wks             | 4                              | Agency          |
| Spiller et al, 1998 (33)           | Almond Control                                                           | 30 HLP                    | 53 (10)                                                | 66 (13)                                              | OP, Italy        | Parallel        | Supp     | Almond                        | 100        | Matched macronutrient diet                         | 45:39:16<br>47:36:17                         | Isocaloric | 4 wks             | 6                              | Agency          |
| Curb et al, 2000 (10)              | Macadamia Control                                                        | 30 (15 M, 15 W)           | 35.25 (18-53)                                          | 23 (19.1 - 28.3)                                     | OP, USA          | Crossover       | Met      | Macadamia                     | 46         | AHA<br>AAD                                         | 48:35:17<br>54:30:16<br>48:35:17             | Isocaloric | 4 wks             | 4                              | Agency-Industry |
| Morgan et al, 2000 (34)            | Pecan Control                                                            | 19 (4 M, 15 W)            | 37 (12)<br>45(10)                                      | 24 (5)<br>24 (4)                                     | OP, USA          | Parallel        | Supp     | Pecan                         | 68         | Self-selected diet                                 | 45:43:12<br>46:36:18                         | Isocaloric | 8 wks             | 6                              | Agency          |
| Zambon et al, 2000 (35)            | Walnut Control                                                           | 49 HC (26 M, 23 W)        | 56 (11)                                                | 70.6 (12.1)                                          | OP, Spain        | Crossover       | Supp     | Walnut                        | 48.5       | Mediterranean diet                                 | 48:34:18<br>50:31:19                         | Isocaloric | 6 wks             | 6                              | Agency          |
| Rajaram et al, 2001 (14)           | Pecan Control                                                            | 23 (14 M, 9 W)            | 25-55                                                  | 74.4 (16.7)                                          | OP, USA          | Crossover       | Met      | Pecan                         | 72         | NCEP Step 1 diet                                   | 47:40:13<br>57:28:15                         | Isocaloric | 4 wks             | 8                              | Agency          |
| Iwamoto et al, 2002 (36)           | Walnut Control                                                           | 40 (20 M, 20 W)           | 23.8 (3.1)†<br>23.6 (4.6)‡                             | 22.2 (0.5)<br>20.7 (0.5)                             | OP, Japan        | Crossover       | Met      | Walnut                        | 52¶        | Average Japanese Diet                              | 60:26:14<br>62:24:14                         | Isocaloric | 4 wks             | 8                              | Agency          |
| Jenkins et al, 2002 (15)           | Almond Control                                                           | 27 HLP (15 M, 12 W)       | 64 (9)                                                 | 71.2 (2.5)<br>71.0 (2.4)                             | OP, Canada       | Crossover       | Supp     | Almond                        | 73         | NCEP Step 2 diet + Muffin                          | 47:36:17<br>57:26:18                         | Isocaloric | 4 wks             | 6                              | Agency          |
| Lovejoy et al, 2002 (37)           | High Fat Almond<br>Low Fat Almond<br>High Fat Control<br>Low Fat Control | 30 DM2 (13 M, 17 W)       | 53.8 (10.4)                                            | 33.0 (5.5)                                           | OP, USA          | Crossover       | Met      | Almond<br>Almond              | 85¶        | High Fat diet<br>Low Fat diet                      | 48:37:15<br>60:25:15<br>48:37:15<br>60:25:15 | Isocaloric | 4 wks             | 5                              | Agency          |
| Sabate et al, 2003 (38)            | High-Almond<br>Low-Almond<br>Control                                     | 25 NL-HC (14 M, 11 W)     | 41 (13)                                                | N/A                                                  | OP, USA          | Crossover       | Met      | Almond<br>Almond              | 83<br>42   | NCEP Step 1 diet                                   | 46:39:14<br>35:51:14<br>56:30:14             | Isocaloric | 4 wks             | 5                              | Agency-Industry |
| Wien et al, 2003 (8)               | Almond Control                                                           | 65 OW/DM2 (28 M, 37 W)    | 53 (2)<br>57 (2)                                       | 113 (5)<br>114 (5)                                   | OP, USA          | Parallel        | Supp     | Almond                        | 84         | CHO-LCD                                            | 53:18:29<br>32:39:29                         | Isocaloric | 24 wks            | 8                              | Agency          |
| Tapsell et al, 2004 (39)           | Walnut Control                                                           | 37 DM2                    | 57.7 (9)<br>59.3 (7.1)                                 | 87.6 (12.8)<br>81.9 (11.2)                           | OP, Australia    | Parallel        | Supp     | Walnut                        | 30         | Modified Fat                                       | 44:32:22<br>41:33:23                         | Isocaloric | 6 months          | 6                              | Agency          |
| Tamizifar et al, 2005 (40)         | Almond Control                                                           | 30 HC (17 M, 13 W)        | 56 (6.1)                                               | 63 (8.9)                                             | OP, Iran         | Crossover       | Supp     | Almond                        | 25         | NCEP Step 1 diet                                   | 47:37:17<br>45:29:15                         | Isocaloric | 4 wks             | 5                              | N/A             |
| Kocyyigit et al, 2006 (16)         | Pistachio Control                                                        | 44 (24 M, 20 W)           | 32.8 (6.7)                                             | 24.2 (6.1)<br>24.6 (5.6)                             | OP, Turkey       | Parallel        | DA       | Pistachio                     | 69         | Regular diet                                       | N/A                                          | Isocaloric | 3 wks             | 8                              | Agency          |
| Kurlandsky et al, 2006 (41)        | Almond<br>Almond + Dark Chocolate<br>Dark chocolate<br>Control           | 47 (47 W)                 | 41.8 (11.7)<br>46.2 (7.8)<br>36.5 (11.9)<br>51.3 (6.3) | 25.3 (3.5)<br>27.2 (4.2)<br>23.9 (3.3)<br>26.1 (4.1) | OP, USA          | Parallel        | Supp     | Almond<br>Almond              | 60         | NCEP ATP III diet + Chocolate<br>NCEP ATP III diet | 51:34:15<br>46:39:15<br>55:30:15<br>57:27:16 | Isocaloric | 6 wks             | 5                              | Agency-Industry |
| Schutte et al, 2006 (53)*          | Walnut<br>Cashew<br>Control                                              | 62 MetS                   | 45.5<br>45.7<br>44.4                                   | 35.9<br>34.7<br>35.5                                 | OP, South Africa | Parallel        | Met      | Walnut<br>Cashew              | 85.5       | Control diet                                       | 47:36:17<br>47:36:17<br>50:33:18             | Isocaloric | 8 wks             | 7                              | Agency-Industry |
| Mukuddem-Petersen et al, 2007 (42) | Walnut<br>Cashew<br>Control                                              | 64 MetS                   | 45 (10)                                                | 107<br>99<br>106                                     | OP, South Africa | Parallel        | Met      | Walnut<br>Cashew              | 85.5¶      | Habitual diet                                      | 49:35:16<br>44:37:19<br>47:33:20             | Isocaloric | 8 wks             | 7                              | Agency-Industry |
| Sheridan et al, 2007 (17)          | Pistachio Control                                                        | 15 HC                     | 60 (11.2)                                              | 175 (26)                                             | OP, USA          | Crossover       | Supp     | Pistachio                     | 35         | Regular diet                                       | 52:31:17<br>53:31:16                         | Isocaloric | 4 wks             | 6                              | Agency          |

Table 1 Cont'd

| Study, year (Reference)            | Participants           | Mean Age (SD or range), y | Mean Body Weight or BMI (SD or range) <sup>§</sup> | Setting         | Design    | Feeding Control | Nut type   | Nuts Dose (g/d) <sup>  </sup> | Comparator                | Diet ††                | Energy Balance | Follow-Up | MQS §§ | Funding Sources <sup>   </sup> |
|------------------------------------|------------------------|---------------------------|----------------------------------------------------|-----------------|-----------|-----------------|------------|-------------------------------|---------------------------|------------------------|----------------|-----------|--------|--------------------------------|
| Gebauer et al, 2008 (43)           |                        |                           |                                                    |                 |           |                 |            |                               |                           |                        |                |           |        |                                |
| 1 PD                               |                        |                           |                                                    |                 |           |                 | Pistachio  | 37                            |                           | 53:34:16               |                |           |        |                                |
| 2 PD                               | 28 HLP (10 M, 18 W)    | 48 (7.9)                  | 76.6 (13.2)                                        | OP, USA         | Crossover | Met             | Pistachio  | 74                            | NCEP Step 1 diet          | 57:29:16               | Isocaloric     | 4 wks     | 5      | Agency                         |
| Control                            |                        |                           |                                                    |                 |           |                 |            |                               |                           | 62:25:15               |                |           |        |                                |
| Griel et al, 2008 (44)             |                        |                           |                                                    |                 |           |                 |            |                               |                           |                        |                |           |        |                                |
| Macadamia                          | 25 HC                  | 50.2 (8.4)                | 26.3 (3.3)                                         | OP, USA         | Crossover | Met             | Macadamia  | 42.5**                        | AAD                       | 50:33:19               | Isocaloric     | 5 wks     | 8      | Agency-Industry                |
| Control                            |                        |                           |                                                    |                 |           |                 |            |                               |                           | 52:33:17               |                |           |        |                                |
| Jenkins et al, 2008 (54)*          |                        |                           |                                                    |                 |           |                 |            |                               |                           |                        |                |           |        |                                |
| Almond                             | 27 HLP (15 M, 12 W)    | 64 (9)                    | 71.2 (2.5)                                         | OP, Canada      | Crossover | Supp            | Almond     | 73                            | NCEP Step 2 diet + Muffin | 47:36:17               | Isocaloric     | 4 wks     | 6      | Agency                         |
| Control                            |                        |                           | 71.0 (2.4)                                         |                 |           |                 |            |                               |                           | 57:26:18               |                |           |        |                                |
| Rajaram et al, 2009 (45)           |                        |                           |                                                    |                 |           |                 |            |                               |                           |                        |                |           |        |                                |
| Walnut                             | 25 NL-HLP (14 M, 11 W) | 23-65                     | 71.9 (15.5)                                        | OP, USA         | Crossover | Met             | Walnut     | 42.5                          | AAD                       | 60:31:15               | Isocaloric     | 4 wks     | 5      | Agency                         |
| Control                            |                        |                           | 71.7 (15.5)                                        |                 |           |                 |            |                               |                           | 57:30:14               |                |           |        |                                |
| Tapsell et al, 2009 (46)           |                        |                           |                                                    |                 |           |                 |            |                               |                           |                        |                |           |        |                                |
| Walnut                             | 35 DM2†                | 54 (8.7)                  | 92.3 (15.7)                                        | OP, Australia   | Parallel  | Supp            | Walnut     | 30                            | Low Fat diet              | 42:29:24               | Isocaloric     | 12 months | 7      | Agency                         |
| Control                            |                        |                           | 93.4 (3)                                           |                 |           |                 |            |                               |                           | 41:34:20               |                |           |        |                                |
| Li et al, 2010 (11)                |                        |                           |                                                    |                 |           |                 |            |                               |                           |                        |                |           |        |                                |
| Almond                             | 52 OW†                 | 45.4 (2.0)                | 86 (26.8)                                          | OP, USA         | Parallel  | Supp            | Pistachio  | 53                            | Pretzel                   | 55:30:15               | Hypocaloric    | 12 wks    | 7      | Agency                         |
| Control                            |                        | 47.3 (2.3)                | 85.5 (40.2)                                        |                 |           |                 |            |                               |                           | 65:20:15               | Hypocaloric    |           |        |                                |
| Ma et al, 2010 (47)                |                        |                           |                                                    |                 |           |                 |            |                               |                           |                        |                |           |        |                                |
| Walnut                             | 22 DM2†                | 58.1 (9.2)                | 89 (15.5)                                          | OP, USA         | Crossover | Supp            | Walnut     | 56                            | Ad libitum diet           | 39:44:17               | Isocaloric     | 8 wks     | 5      | N/A                            |
| Control                            |                        |                           |                                                    |                 |           |                 |            |                               |                           | 43:38:19               |                |           |        |                                |
| Torabian et al, 2010 (12)          |                        |                           |                                                    |                 |           |                 |            |                               |                           |                        |                |           |        |                                |
| Walnut                             | 87 (38 M, 49 W)        | 54 (10.2)                 | 75.6 (13.2)                                        | OP, USA         | Crossover | Supp            | Walnut     | 46                            | Habitual diet             | N/A                    | Isocaloric     | 6 months  | 6      | Agency                         |
| Control                            |                        |                           |                                                    |                 |           |                 |            |                               |                           |                        |                |           |        |                                |
| Wien et al, 2010 (48)              |                        |                           |                                                    |                 |           |                 |            |                               |                           |                        |                |           |        |                                |
| Almond                             | 65 PD (17 M, 48 W)     | 53 (9)                    | 82.9 (14.4)                                        | OP, USA         | Parallel  | Supp            | Almond     | 58                            | AAD                       | 42:39:19               | Isocaloric     | 16 wks    | 9      | Agency                         |
| Control                            |                        | 54 (11)                   | 80.5 (14.4)                                        |                 |           |                 |            |                               |                           | 48:30:21               |                |           |        |                                |
| Wu et al, 2010 (49)                |                        |                           |                                                    |                 |           |                 |            |                               |                           |                        |                |           |        |                                |
| Walnut                             | 189 MetS               | 48.2 (8.4)                | 72.2 (11.4)                                        | OP, USA         | Parallel  | Supp            | Walnut     | 30                            | AHA                       | 48:37:15               | Isocaloric     | 12 wks    | 9      | Agency                         |
| Control                            |                        | 48.6 (8)                  | 70.6 (10.9)                                        |                 |           |                 |            |                               |                           | 51:34:15               |                |           |        |                                |
| Casas-Agustench et al, 2011 (50)   |                        |                           |                                                    |                 |           |                 |            |                               |                           |                        |                |           |        |                                |
| Mixed Nuts                         | 50 MetS (28 M, 22 W)   | 52.9 (8.4)                | 31.6 (2.8)                                         | OP, Spain       | Parallel  | Supp            | Mixed Nuts | 30                            | Prudent diet              | 41:36:19               | Isocaloric     | 12 wks    | 6      | Agency                         |
| Control                            |                        | 50.6 (8.4)                | 30.0 (3.3)                                         |                 |           |                 |            |                               |                           | 42:36:19               |                |           |        |                                |
| Cohen et al, 2011 (19)             |                        |                           |                                                    |                 |           |                 |            |                               |                           |                        |                |           |        |                                |
| Almond                             | 13 DM2 (7 M, 6 W)      | 66 (11.9)                 | 96.1 (40.4)                                        | OP, USA         | Parallel  | Supp            | Almond     | 28                            | Cheese sticks             | N/A                    | Isocaloric     | 12 wks    | 7      | Agency                         |
| Control                            |                        |                           | 105.1 (32.1)                                       |                 |           |                 |            |                               |                           |                        |                |           |        |                                |
| Jenkins et al, 2011 (20)           |                        |                           |                                                    |                 |           |                 |            |                               |                           |                        |                |           |        |                                |
| Mixed Nuts                         | 79 DM2 (52 M, 27 W)    | 63 (9)                    | 80 (15)                                            | OP, Canada      | Parallel  | Supp            | Mixed nuts | 75 <sup>  </sup>              | NCEP Step 2 diet + Muffin | 41:41:18               | Isocaloric     | 12 wks    | 8      | Agency                         |
| Control                            |                        | 61 (10)                   | 83 (15)                                            |                 |           |                 |            |                               |                           | 46:35:19               |                |           |        |                                |
| Li et al, 2011 (21)                |                        |                           |                                                    |                 |           |                 |            |                               |                           |                        |                |           |        |                                |
| Almond                             | 20 DM2 (9 M, 11 W)     | 58 (8.9)                  | 26 (3.1)                                           | OP, Taiwan      | Crossover | Met             | Almond     | 56                            | NCEP step 2 diet          | 47:37:17               | Isocaloric     | 4 wks     | 5      | Agency                         |
| Control                            |                        |                           |                                                    |                 |           |                 |            |                               |                           | 57:27:17               |                |           |        |                                |
| Tey et al, 2011 (51)               |                        |                           |                                                    |                 |           |                 |            |                               |                           |                        |                |           |        |                                |
| Hazelnut                           | 61                     | 38.9 (14.3)               | 72 (11.1)                                          | OP, New Zealand | Parallel  | Supp            | Hazelnut   | 42                            | Regular diet              | 45:39:16 <sup>##</sup> | Isocaloric     | 12 wks    | 9      | Agency                         |
| Control                            |                        | 36.1 (15.2)               | 67.3 (9.5)                                         |                 |           |                 |            |                               |                           | 50:33:17               |                |           |        |                                |
| Darvish Damavandi et al, 2012 (18) |                        |                           |                                                    |                 |           |                 |            |                               |                           |                        |                |           |        |                                |
| Cashew                             | 43 DM2 (9 M, 34 W)     | 51 (7.9)                  | 72.1 (13.1)                                        | OP, Iran        | Parallel  | Supp            | Cashew     | 30                            | Regular diet              | 53:32:16               | Isocaloric     | 8 wks     | 3      | N/A                            |
| Control                            |                        | 56 (5.7)                  | 71.9 (9.7)                                         |                 |           |                 |            |                               |                           | 57:27:16               |                |           |        |                                |
| Foster et al, 2012 (52)            |                        |                           |                                                    |                 |           |                 |            |                               |                           |                        |                |           |        |                                |
| Almond                             | 123 OW (11 M, 112 W)   | 47 (12)                   | 94 (13.1)                                          | OP, USA         | Parallel  | Supp            | Almond     | 56                            | Nut free diet             | N/A                    | Hypocaloric    | 18 months | 9      | Agency                         |
| Control                            |                        | 46.7 (13)                 | 91.5 (11.9)                                        |                 |           |                 |            |                               |                           |                        | Hypocaloric    |           |        |                                |
| Wang et al, 2012 (22)              |                        |                           |                                                    |                 |           |                 |            |                               |                           |                        |                |           |        |                                |
| Pistachios                         | 86 MetS                | 51.9 (8.8)                | 28.1 (3.2)                                         | OP, China       | Parallel  | Supp            | Pistachio  | 42                            | AHA Step 1 diet           | N/A                    | Isocaloric     | 12 wks    | 5      | Industry                       |
| High pistachios                    |                        | 51.8 (9.4)                | 28 (4.5)                                           |                 |           |                 | Pistachio  | 70                            |                           |                        |                |           |        |                                |
| Control                            |                        | 50.7 (9.9)                | 28 (4.4)                                           |                 |           |                 |            |                               |                           |                        |                |           |        |                                |
| West et al, 2012 (55)*             |                        |                           |                                                    |                 |           |                 |            |                               |                           |                        |                |           |        |                                |
| 1 Pistachio                        | 28 HLP (10 M, 18 W)    | 48 (7.9)                  | 76.6 (13.2)                                        | OP, USA         | Crossover | Met             | Pistachio  | 37                            | NCEP Step 1 diet          | 53:34:16               | Isocaloric     | 4 wks     | 5      | Agency                         |
| 2 Pistachio                        |                        |                           |                                                    |                 |           |                 | Pistachio  | 74                            |                           | 57:29:16               |                |           |        |                                |
| Control                            |                        |                           |                                                    |                 |           |                 |            |                               |                           | 62:25:15               |                |           |        |                                |
| Somers et al, 2013 (9)             |                        |                           |                                                    |                 |           |                 |            |                               |                           |                        |                |           |        |                                |
| Macadamia                          | 64 OW (10 M, 54 W)     | 43.7 (8.4)                | 95 (14.7)                                          | OP, Australia   | Parallel  | DA              | Macadamia  | 46                            | Regular diet              | 36:38:21               | Isocaloric     | 10 wks    | 9      | Agency                         |
| Control                            |                        | 43.2 (10.9)               | 99.6 (15.2)                                        |                 |           |                 |            |                               |                           | 41:38:17               |                |           |        |                                |

**Table 1.** Characteristics of RCTs Investigating the effect of Tree Nuts on Criteria of the MetS

MetS: metabolic syndrome; DM2: type 2 diabetes mellitus; OW: overweight; HLP: hyperlipidemic; NL-HLP: normal to mildly hyperlipidemic; HC: Hypercholesterolemic; NL-HC: normal to hypercholesterolemic; M: men; W: women; BMI: body mass index; OP: out-patient; IP: In-patient; USA: United States of America; SUPP: supplement; Met: metabolic; DA: dietary advice; N/A: not available; AHA: American Heart Association; AAD: Average American Diet; NCEP: National Cholesterol Education Program; CHO-LCD: Self-selected Complex Carbohydrate diet; WKS: weeks; MQS: Heyland Methodological Quality Score.

\* Companion reports: Jenkins et al, 2008 for Jenkins et al, 2002; Schutte et al, 2006 for Mukuddem-Petersen et al, 2007; Wang et al, 2012 for Gebauer et al, 2008.

† Baseline characteristics were given based on the number of randomized participants for Li et al, 2010 n=70; Ma et al, 2010 n=24; Zambon et al, 2000 n=55 and for recruited subjects for Tapsell et al. 2009 (n=50).

‡ Mean age was given separately for men and women.

§ Body weight is reported in kg and BMI is reported in kg/m<sup>2</sup>. BMI is reported only when no data on weight were available.

|| Nut dose is given based on grams (g) per day, 1oz = 28 g.

¶ Median was taken from a range given. Iwamoto et al, 2010 range 50-54 g/d; Jenkins et al, 2011 range 50-75 g/d; Lovejoy et al, 2002 range 57-113 g/d; Mukuddem-Petersen et al, 2007 range 63-108 g/d; Torabian et al, 2010 range 28-64 g/d; Zambon et al, 2000 range 41-56 g/d.

\*\* Based on 2100 kcal.

†† Energy from carbohydrate:fat:protein.

‡‡ Values for carbohydrates are given in geometric means.

§§ Trials with scores ≥8 were considered to be of high quality.

||| Agency funding is that from government, university, or not-for-profit health agency sources.

**FIGURE LEGENDS**

**Figure 1.** Summary of evidence search and selection

**Figure 2.** Forest plot of the RCTs investigating the effect of Tree Nuts on Triglycerides. Pooled effect estimates are shown as diamonds, one each for trials conducted in otherwise healthy, dyslipidemia, metabolic syndrome criteria, diabetes and their combination (total). Paired analyses were applied to all crossover trials (15) and one substudy. Data are expressed as mean differences (MD) with 95% CI, using generic inverse-variance random-effects models. Interstudy heterogeneity was tested by using the Cochrane's Q statistic ( $I^2$ ) at a significance level of  $P < 0.10$  and quantified by  $I^2$ , levels  $\geq 50\%$  considerable heterogeneity and  $\geq 75\%$ , substantial heterogeneity. TG = Triglycerides, mmol/L = mill moles per liter, A = Almond, AC = Almond + Chocolate, HF = High Fat, LF = Low Fat.

1  
2  
3 **Figure 1.** Summary of evidence search and selection

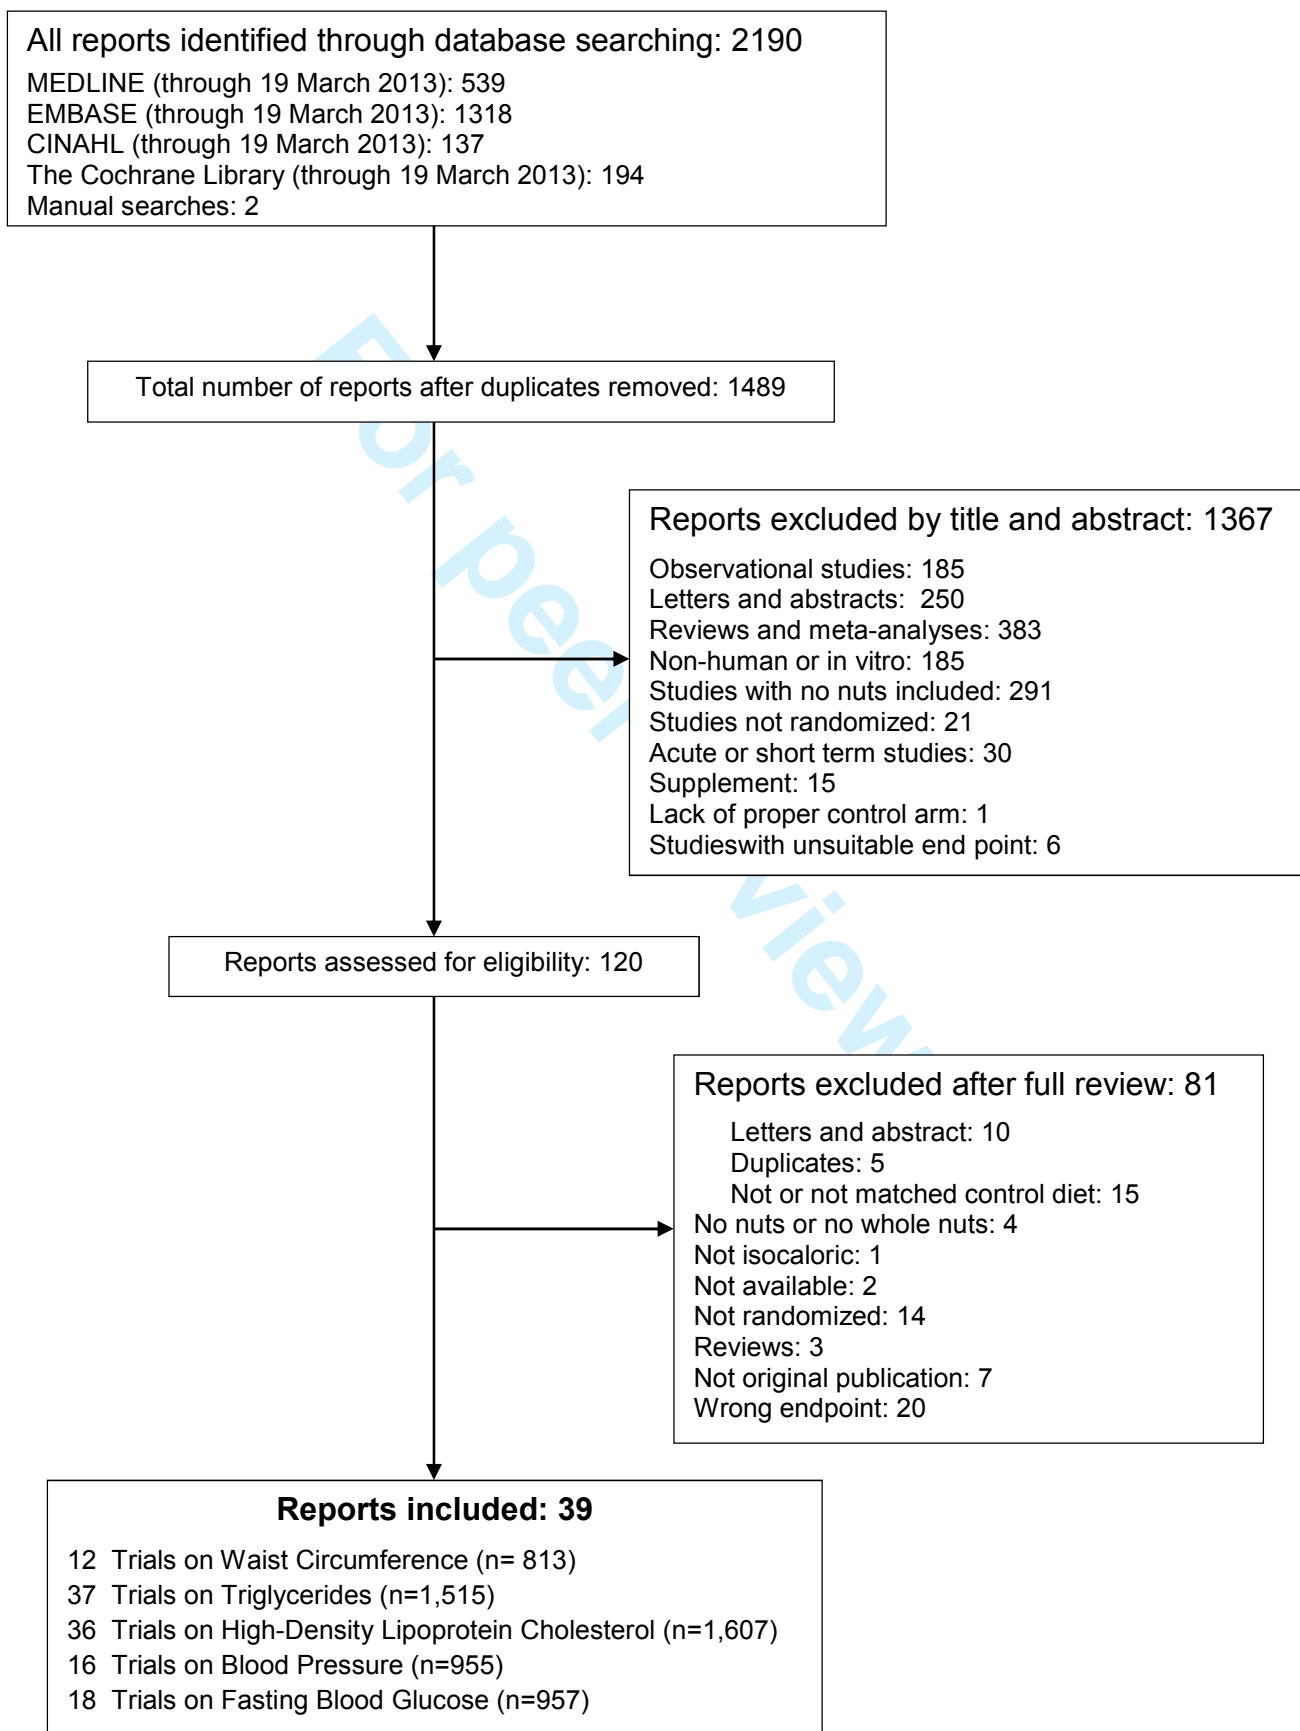

Figure 2. Forest plot of the RCTs investigating the effect of Tree Nuts on Triglycerides

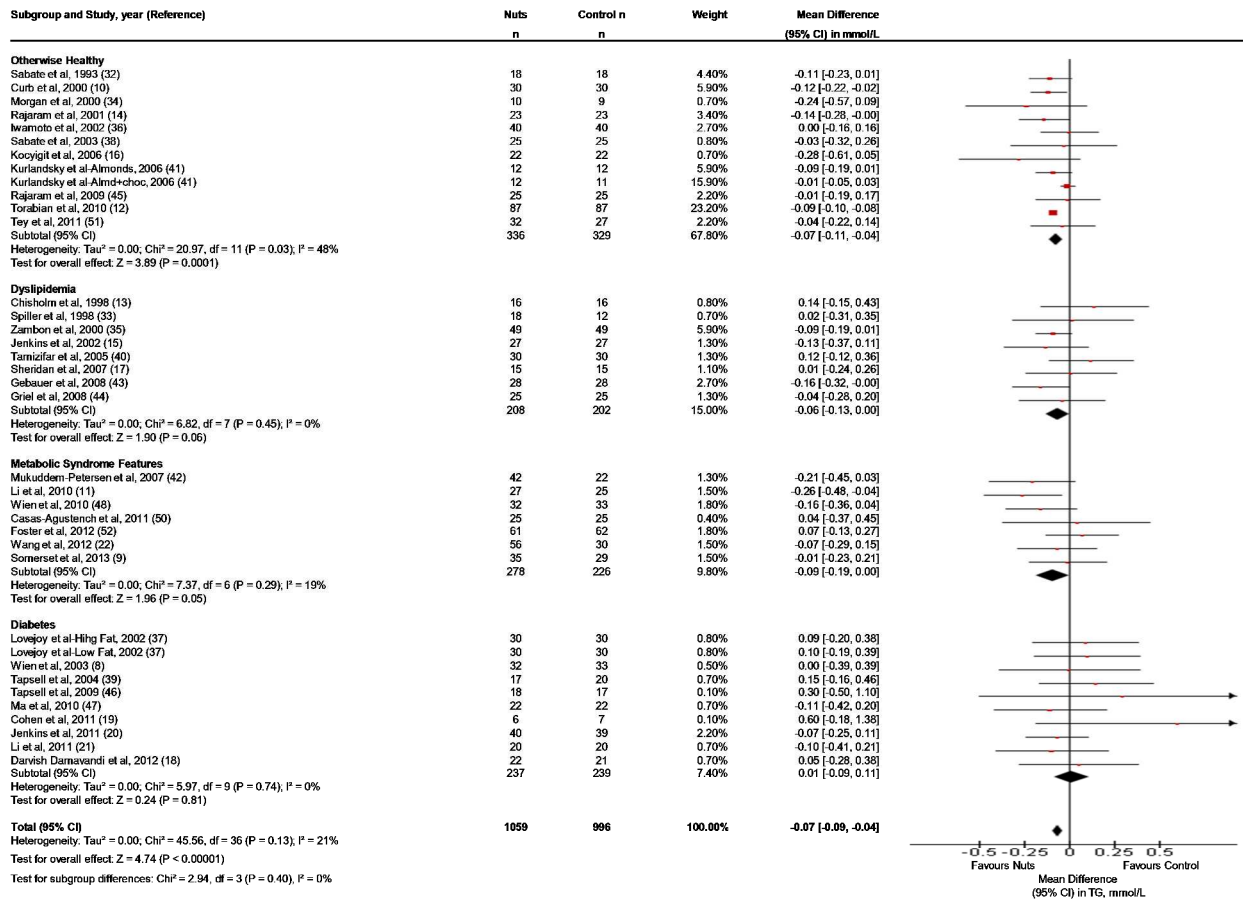

Appendix Table 1. Search Strategy for Studies Assessing the Effect of Tree Nut consumption on Metabolic Syndrome Criteria in RCTs.

| Database | SearchPeriod              | Search                                                                                                                                                                                                                                                                                                                                                                                                                                                                                                                                                                                                                                                                                                                                                                                                                                                                                                                                                                                                                                                                                                                                                                                                                                                                                                                                                                                                                                                                                                                                                                                                                                                                                                                                                |
|----------|---------------------------|-------------------------------------------------------------------------------------------------------------------------------------------------------------------------------------------------------------------------------------------------------------------------------------------------------------------------------------------------------------------------------------------------------------------------------------------------------------------------------------------------------------------------------------------------------------------------------------------------------------------------------------------------------------------------------------------------------------------------------------------------------------------------------------------------------------------------------------------------------------------------------------------------------------------------------------------------------------------------------------------------------------------------------------------------------------------------------------------------------------------------------------------------------------------------------------------------------------------------------------------------------------------------------------------------------------------------------------------------------------------------------------------------------------------------------------------------------------------------------------------------------------------------------------------------------------------------------------------------------------------------------------------------------------------------------------------------------------------------------------------------------|
| MEDLINE  | 1946 to March Week 1 2013 | <ol style="list-style-type: none"> <li>1. exp nut/ Or nuts.mp. Or nut.mp. Or expbertholletia/ Or walnut*.mp. Or expJuglans/ Or almond*.mp. Or expPrunus/ Or pecan*.mp. Or expCarya/ Or pistachio*.mp. Or expPistacia/ Or cashew*.mp. Or expAnacardium/ Or hazelnut*.mp. Or expCorylus/ Or macadamia*.mp. Or exp Macadamia/</li> <li>2. ogtt.mp. Or exp Glucose Tolerance Test/ Or "glucose tolerance test".mp. Or hba1c.mp. Or fructosamine*.mp. Or expFructosamine/ Or insulin*.mp. Or exp Insulin/ Or glycemia*.mp. Or glycaemia*.mp. Or hyperinsulin*.mp. Or expHyperinsulinism/ Or dysglycemia*.mp. Or dysglycaemia*.mp. Or gly* albumin.mp. Or expHemoglobin A, Glycosylated/ Or "blood glucose".mp. Or exp Blood Glucose/ Or hyperglycemia*.mp. Or 39. hyperglycaemia*.mp. Or expHyperglycemia/ Or "homeo* model assessment".mp. Or homa.mp. Or diabetes.mp. Or exp Diabetes Mellitus/</li> <li>3. exp Hypertension/ Or exp Blood Pressure/ Or "systolic blood pressure".mp. Or "diastolic blood pressure".mp. Or hypertension.mp. Or SBP.mp. Or DBP.mp. Or "mean arterial pressure".mp.</li> <li>4. exp Triglycerides/ Or exp Hypertriglyceridemia/ Or hypertriglyceridemia*.mp. Or triglyceride*.mp. Or triacylglycerol*.mp. Or dyslipidemia*.mp. Or dyslipidaemia*.mp. Or exp Dyslipidemias/</li> <li>5. exp Cholesterol, HDL/ Or "high density lipoprotein cholesterol".mp. Or hdl.mp.</li> <li>6. "abdominal obesity".mp. Or exp Obesity, Abdominal/ Or "waist circumference".mp. Or exp waist circumference/ Or "abdominal fat*".mp. Or exp Abdominal Fat/</li> <li>7. exp Insulin Resistance/ Or "metabolic syndrome".mp.</li> <li>8. 1 and (2 or 3 or 4 or 5 or 6 or 7)</li> <li>9. limit 8 to animals†</li> <li>10. 8 not 9</li> </ol> |
| EMBASE   | 1946 to 2013 Week 11      | <ol style="list-style-type: none"> <li>1. exp nut/ Or nuts.mp. Or nut.mp. Or expbertholletia/ Or walnut*.mp. Or expJuglans/ Or almond*.mp. Or expPrunus/ Or pecan*.mp. Or expCarya/ Or pistachio*.mp. Or expPistacia/ Or cashew*.mp. Or expAnacardium/ Or hazelnut*.mp. Or expCorylus/ Or macadamia*.mp. Or exp Macadamia/</li> <li>2. ogtt.mp. Or exp Glucose Tolerance Test/ Or "glucose tolerance test".mp. Or hba1c.mp. Or fructosamine*.mp. Or expFructosamine/ Or insulin*.mp. Or exp Insulin/ Or glycemia*.mp. Or glycaemia*.mp. Or hyperinsulin*.mp. Or expHyperinsulinism/ Or dysglycemia*.mp. Or dysglycaemia*.mp. Or gly* albumin.mp. Or expHemoglobin A, Glycosylated/ Or "blood glucose".mp. Or exp Blood Glucose/ Or hyperglycemia*.mp. Or 39. hyperglycaemia*.mp. Or expHyperglycemia/ Or "homeo* model assessment".mp. Or homa.mp. Or diabetes.mp. Or exp Diabetes Mellitus/</li> <li>3. exp Hypertension/ Or exp Blood Pressure/ Or "systolic blood pressure".mp. Or "diastolic blood pressure".mp. Or hypertension.mp. Or SBP.mp. Or DBP.mp. Or "mean arterial pressure".mp.</li> <li>4. exp Triglycerides/ Or exp Hypertriglyceridemia/ Or hypertriglyceridemia*.mp. Or triglyceride*.mp. Or triacylglycerol*.mp. Or dyslipidemia*.mp. Or dyslipidaemia*.mp. Or exp Dyslipidemias/</li> <li>5. exp Cholesterol, HDL/ Or "high density lipoprotein cholesterol".mp. Or hdl.mp.</li> <li>6. "abdominal obesity".mp. Or exp Obesity, Abdominal/ Or "waist circumference".mp. Or exp waist circumference/ Or "abdominal fat*".mp. Or exp Abdominal Fat/</li> <li>7. exp Insulin Resistance/ Or "metabolic syndrome".mp.</li> <li>8. 1 and (2 or 3 or 4 or 5 or 6 or 7)</li> <li>9. limit 8 to animals†</li> <li>10. 8 not 9</li> </ol> |



|                      |                         |                                                                                                                                                                                                                                                                                                                                                                                                                                                                                                                                                                                                                                                                                                                                                                                                                                                                                                                                                                                                                                                                                                       |
|----------------------|-------------------------|-------------------------------------------------------------------------------------------------------------------------------------------------------------------------------------------------------------------------------------------------------------------------------------------------------------------------------------------------------------------------------------------------------------------------------------------------------------------------------------------------------------------------------------------------------------------------------------------------------------------------------------------------------------------------------------------------------------------------------------------------------------------------------------------------------------------------------------------------------------------------------------------------------------------------------------------------------------------------------------------------------------------------------------------------------------------------------------------------------|
| CINHAL               | 1982 to 19 March 2013   | <ol style="list-style-type: none"> <li>1. (MH "Nuts+") Or "pistachio" Or "hazelnut" Or "macadamia" Or "brazil nut" Or "brazil nuts" Or "pine nut" Or "pine nuts".</li> <li>2. "ogtt" Or (MM "Hemoglobin A, Glycosylated") Or "HbA1c" Or "fructosamine" Or "Insulin" Or "glycemia" Or "hyprinsulin" Or "dysglycemia" Or "gly* albumin" Or "blood glucose" Or "hyperglycemia" Or "homa" Or (MH "Diabetes Mellitus") Or "diabetes mellitus".</li> <li>3. (MH "Hypertension") Or "hypertension" Or "SBP" Or "DBP" Or "mean arterial pressure" Or "MAP".</li> <li>4. "triglycerides" Or "hypertriglyceridemia" Or "TG" Or "TAG" Or "dyslipidemia".</li> <li>5. "HDL" Or (MH "Lipoproteins, HDL Cholesterol") Or "hypercholesterolemia".</li> <li>6. "abdominal obesity" Or "abdominal fat" Or "waist circumference".</li> <li>7. "Insulin resistance" Or "metabolic syndrome".</li> <li>8. 1 and (2 or 3 or 4 or 5 or 6 or 7).</li> </ol>                                                                                                                                                                  |
| The Cochrane Library | Through March 19th 2013 | <ol style="list-style-type: none"> <li>1. nuts.mp. Or nut.mp. Or brazil nut.mp. Or brazil nuts.mp. Or pine nut.mp. Or walnut*.mp. Or almond*.mp. Or pecan*.mp. Or pistachio*.mp. Or cashew*.mp. Or hazelnut*.mp. Or macadamia.mp.</li> <li>2. ogtt.mp. Or hba1c.mp. Or fuctosamine*.mp. Or Insulin*.mp. Or glycemia.mp. Hyperinsulin*.mp. Or dysglycemia.mp. Or gly* albumin.mp. Or exp Blood Glucose/ Or blood glucose.mp. Or expHyperglycemia/ Or homa.mp. Or exp Diabetes Mellitus/ Or diabetes mellitus.mp.</li> <li>3. hypertension.mp. Or /blood pressure.mp. Or systolic blood pressure.mp. Or diastolic blood pressure.mp. Or hypertension.mp. Or SBP.mp. Or DBP.mp. Or mean arterial pressure.mp. Or MAP.mp.</li> <li>4. triglycerides.mp. Or hypertriglyceridemia.mp. Or TG.mp. Or triacylglycerol*.mp. Or TAG.mp. Or dyslipidemia.mp.</li> <li>5. HDL.mp. Or HDL cholesterol.mp. Or hypercholesterolemia.mp.</li> <li>6. abdominal obesity.mp. Or abdominal fat.mp.</li> <li>7. insulin resistance.mp. Or metabolic syndrome.mp.</li> <li>8. 1 and (2 or 3 or 4 or 5 or 6 or 7)</li> </ol> |

\* The symbol at the end of each search term is used in order to capture all possible endings with that word.

Original search date for all databases was May 25th 2012; update search date for all databases was March 19th 2013.

† Searches were limited to animals and then extracted from the general search.

Appendix Table 2 – Study Quality Assessment by Using the Heyland MQS\*

| Study, Year (Reference)              | Design†             |                |                | Sample‡         |                     |                 | Intervention§  |                        |                  | MQS (n/13) |
|--------------------------------------|---------------------|----------------|----------------|-----------------|---------------------|-----------------|----------------|------------------------|------------------|------------|
|                                      | Randomization (n/2) | Blinding (n/1) | Analysis (n/2) | Selection (n/1) | Comparability (n/1) | Follow-up (n/1) | Protocol (n/1) | Co-interventions (n/2) | Crossovers (n/2) |            |
| 9 Sabate et al, 1993 (32)            | 1                   | 0              | 0              | 1               | 1                   | 0               | 1              | 2                      | 0                | 6          |
| 10 Chisholm et al, 1998 (13)         | 1                   | 0              | 0              | 0               | 1                   | 0               | 0              | 2                      | 0                | 4          |
| 11 Spiller et al, 1998 (33)          | 1                   | 0              | 0              | 1               | 1                   | 0               | 1              | 2                      | 0                | 6          |
| 12 Curb et al, 2000 (10)             | 1                   | 0              | 0              | 0               | 1                   | 0               | 0              | 2                      | 0                | 4          |
| 13 Morgan et al, 2000 (34)           | 1                   | 0              | 0              | 1               | 1                   | 0               | 1              | 2                      | 0                | 6          |
| 14 Zambon et al, 2000 (35)           | 2                   | 0              | 0              | 0               | 1                   | 0               | 1              | 2                      | 0                | 6          |
| 15 Rajaram et al, 2001 (14)          | 2                   | 0              | 0              | 1               | 1                   | 1               | 1              | 2                      | 0                | 8          |
| 16 Iwamoto et al, 2002 (36)          | 1                   | 0              | 2              | 0               | 1                   | 1               | 1              | 2                      | 0                | 8          |
| 17 Jenkins et al, 2002 (15)          | 1                   | 0              | 0              | 1               | 1                   | 0               | 1              | 2                      | 0                | 6          |
| 18 Lovejoy et al, 2002 (37)          | 1                   | 1              | 0              | 0               | 1                   | 0               | 0              | 2                      | 0                | 5          |
| 19 Sabate et al, 2003 (38)           | 1                   | 0              | 0              | 0               | 1                   | 0               | 1              | 2                      | 0                | 5          |
| 20 Wien et al, 2003 (8)              | 2                   | 0              | 2              | 0               | 1                   | 0               | 1              | 2                      | 0                | 8          |
| 21 Tapsell et al, 2004 (39)          | 1                   | 0              | 2              | 1               | 1                   | 0               | 0              | 1                      | 0                | 6          |
| 22 Tamizifar et al, 2005 (40)        | 1                   | 0              | 0              | 0               | 1                   | 0               | 1              | 2                      | 0                | 5          |
| 23 Kocyigit et al, 2006 (16)         | 1                   | 0              | 2              | 0               | 1                   | 1               | 1              | 2                      | 0                | 8          |
| 24 Kurlandsky et al, 2006 (41)       | 1                   | 0              | 0              | 0               | 1                   | 0               | 1              | 2                      | 0                | 5          |
| 25 Schutte et al, 2006 (53)          | 2                   | 0              | 0              | 1               | 1                   | 0               | 1              | 2                      | 0                | 7          |
| 26 Mukuddem-Petersen et al, 2007(42) | 2                   | 0              | 0              | 1               | 1                   | 0               | 1              | 2                      | 0                | 7          |
| 27 Sheridan et al, 2007 (17)         | 1                   | 0              | 0              | 1               | 1                   | 0               | 1              | 2                      | 0                | 6          |
| 28 Gebauer et al, 2008 (43)          | 1                   | 0              | 0              | 1               | 1                   | 0               | 1              | 1                      | 0                | 5          |
| 29 Griel et al, 2008 (44)            | 1                   | 0              | 2              | 0               | 1                   | 1               | 1              | 2                      | 0                | 8          |
| 30 Jenkins et al, 2008 (54)          | 1                   | 0              | 0              | 1               | 1                   | 0               | 1              | 2                      | 0                | 6          |
| 31 Rajaram et al, 2009 (45)          | 1                   | 0              | 0              | 1               | 1                   | 0               | 0              | 2                      | 0                | 5          |
| 32 Tapsell et al, 2009 (46)          | 2                   | 0              | 0              | 1               | 1                   | 0               | 1              | 2                      | 0                | 7          |
| 33 Li et al, 2010 (11)               | 2                   | 0              | 0              | 1               | 1                   | 0               | 1              | 2                      | 0                | 7          |
| 34 Ma et al, 2010 (47)               | 1                   | 0              | 0              | 1               | 1                   | 0               | 1              | 1                      | 0                | 5          |
| 35 Torabian et al, 2010 (12)         | 1                   | 0              | 0              | 1               | 1                   | 0               | 1              | 2                      | 0                | 6          |
| 36 Wien et al, 2010 (48)             | 2                   | 0              | 2              | 1               | 1                   | 0               | 1              | 2                      | 0                | 9          |
| 37 Wu et al, 2010 (49)               | 2                   | 0              | 2              | 1               | 1                   | 0               | 1              | 2                      | 0                | 9          |
| 38 Casas-Agustench et al, 2011 (50)  | 1                   | 0              | 0              | 1               | 1                   | 0               | 1              | 2                      | 0                | 6          |
| 39 Cohen et al, 2011 (19)            | 1                   | 0              | 2              | 0               | 1                   | 1               | 0              | 2                      | 0                | 7          |
| 40 Jenkins et al, 2011 (20)          | 1                   | 0              | 2              | 1               | 1                   | 0               | 1              | 2                      | 0                | 8          |
| 41 Li et al, 2011 (21)               | 1                   | 0              | 0              | 0               | 1                   | 0               | 1              | 2                      | 0                | 5          |
| 42 Tey et al, 2011 (51)              | 2                   | 0              | 2              | 1               | 1                   | 0               | 1              | 2                      | 0                | 9          |
| 43 DarvishDamavandi et al, 2012 (18) | 1                   | 0              | 0              | 0               | 0                   | 0               | 1              | 1                      | 0                | 3          |

|   |                          |   |   |   |   |   |   |   |   |   |   |
|---|--------------------------|---|---|---|---|---|---|---|---|---|---|
| 1 | Foster et al, 2012 (52)  | 2 | 0 | 2 | 0 | 1 | 1 | 1 | 2 | 0 | 9 |
| 1 | Wang et al, 2012 (22)    | 1 | 0 | 0 | 0 | 1 | 0 | 1 | 2 | 0 | 5 |
| 2 | West et al, 2012 (55)    | 1 | 0 | 0 | 1 | 1 | 0 | 1 | 1 | 0 | 5 |
| 3 | Somerset et al, 2013 (9) | 1 | 0 | 2 | 1 | 1 | 1 | 1 | 2 | 0 | 9 |

4  
5 MQS=Heyland Methodological Quality Score; n/ = total score per category and total MQS score.

6 \* The Heyland MQS assigns a score of 0 or 1 or from 0 to 2 over 9 categories of quality related to study design, sampling procedures, and  
7 interventions, for a total of 13 points. Trials that scored  $\geq 8$  were considered to be of higher quality (11).

8 † Randomization was scored 2 points for being randomized with the methods described, 1 point for being randomized without the methods  
9 described, or 0 points for being neither randomized nor having the methods described. Blinding was scored 1 point for being double-blind or 0 points  
10 for "other." Analysis was scored 2 points for being intention-to-treat; all other types of analyses scored 0 points.

11 ‡ Sample selection was scored 1 point for being consecutive eligible or 0 points for being preselected or indeterminate. Sample comparability was  
12 scored 1 point for being comparable or 0 points for not being comparable at baseline. Follow-up was scored 1 point for being 100% or 0 points for  
13 <100%.

14 § Treatment protocol was scored 1 point for being reproducibly described or 0 points for being poorly described. Co-interventions were scored 2  
15 points for being described and equal, 1 point for being described but unequal or indeterminate, or 0 points for not being described. Treatment  
16 crossovers (where participants were switched from the control treatment to the experimental treatment) were scored 2 points for being <10%, 1 point  
17 for being >10%, and 0 points for not being described.

19

20

21

22

23

24

25

26

27

28

29

30

31

32

33

34

35

36

37

38

39

40

41

42

43

44

45

46

47

48

49

Appendix Table 3. A priori subgroup analyses of continuous variables for criteria of the Metabolic Syndrome

| A. Waist Circumference                  |               |     |                        |                    |         | D. Systolic Blood Pressure              |               |     |                         |                    |         |
|-----------------------------------------|---------------|-----|------------------------|--------------------|---------|-----------------------------------------|---------------|-----|-------------------------|--------------------|---------|
| Subgroups                               | No. of Trials | N   | $\beta$ [95% CI]       | Residual $I^2$ (%) | P-value | Subgroups                               | No. of Trials | N   | $\beta$ [95% CI]        | Residual $I^2$ (%) | P-value |
| Nuts Dose (g/d)                         | 12            | 813 | -0.020 [-0.099, 0.060] | 66.8               | 0.60    | Nuts Dose (g/d)                         | 16            | 955 | -0.076 [-0.188, 0.037]  | 55.1               | 0.17    |
| Duration (weeks)                        | 12            | 813 | -0.136 [-0.451, 0.179] | 64.4               | 0.36    | Duration (weeks)                        | 16            | 955 | -0.031 [-0.160, 0.097]  | 55.6               | 0.61    |
| Saturated Fat (%)                       | 11            | 727 | 0.178 [-0.385, 0.741]  | 69                 | 0.49    | Saturated Fat (%)                       | 14            | 746 | 0.791 [-0.091, 1.672]   | 54.8               | 0.07    |
| Change in Saturated Fat (%)             | 9             | 551 | 0.633 [-0.463, 1.729]  | 48.6               | 0.21    | Change in Saturated Fat (%)             | 10            | 621 | -0.333 [-1.115, 0.449]  | 0                  | 0.36    |
| Difference in Saturated Fat (%)         | 11            | 727 | 0.764 [-0.852, 2.380]  | 70.4               | 0.31    | Difference in Saturated Fat (%)         | 14            | 746 | -1.261 [-2.666, 0.145]  | 44.7               | 0.07    |
| Fiber Intake (g/d)                      | 11            | 786 | 0.006 [-0.206, 0.217]  | 70.8               | 0.95    | Fiber Intake (g/d)                      | 14            | 746 | -0.273 [-0.522, -0.023] | 48.1               | 0.04    |
| Change in Fiber Intake (g/d)            | 7             | 637 | 0.022 [-0.374, 0.418]  | 67.1               | 0.89    | Change in Fiber Intake (g/d)            | 7             | 490 | -0.008 [-0.248, 0.233]  | 0                  | 0.94    |
| Difference in Fiber Intake (g/d)        | 11            | 721 | -0.050 [-0.343, 0.243] | 71                 | 0.71    | Difference in Fiber Intake (g/d)        | 14            | 746 | -0.291 [-0.698, 0.117]  | 52.5               | 0.15    |
| Baseline (cm)                           | 10            | 727 | -0.006 [-0.071, 0.059] | 70.7               | 0.84    | Baseline (mmHg)                         | 13            | 786 | -0.108 [-0.442, 0.226]  | 59.7               | 0.49    |
| Difference in Carbohydrate intake (%/d) | 11            | 727 | 0.255 [0.062, 0.448]   | 41.4               | 0.02    | Difference in Carbohydrate intake (%/d) | 14            | 746 | 0.546 [0.194, 0.895]    | 24                 | < 0.01  |

  

| B. Triglycerides                        |               |      |                        |                    |         | E. Diastolic Blood Pressure             |               |     |                        |                    |         |
|-----------------------------------------|---------------|------|------------------------|--------------------|---------|-----------------------------------------|---------------|-----|------------------------|--------------------|---------|
| Subgroups                               | No. of Trials | N    | $\beta$ [95% CI]       | Residual $I^2$ (%) | P-value | Subgroups                               | No. of Trials | N   | $\beta$ [95% CI]       | Residual $I^2$ (%) | P-value |
| Nuts Dose (g/d)                         | 37            | 1523 | -0.001 [-0.003, 0.001] | 19.7               | 0.35    | Nuts Dose (g/d)                         | 16            | 955 | -0.012 [-0.042, 0.019] | 14.82              | 0.43    |
| Duration (weeks)                        | 37            | 1523 | 0.002 [-0.001, 0.005]  | 17.5               | 0.15    | Duration (weeks)                        | 16            | 955 | 0.014 [-0.029, 0.057]  | 15.3               | 0.50    |
| Saturated Fat (%)                       | 32            | 1162 | 0.006 [-0.008, 0.020]  | 0                  | 0.41    | Saturated Fat (%)                       | 14            | 746 | 0.047 [-0.273, 0.367]  | 21.5               | 0.75    |
| Change in Saturated Fat (%)             | 17            | 786  | -0.003 [-0.026, 0.021] | 0                  | 0.81    | Change in Saturated Fat (%)             | 10            | 621 | -0.275 [-0.703, 0.152] | 0                  | 0.18    |
| Difference in Saturated Fat (%)         | 32            | 1162 | 0.005 [-0.011, 0.020]  | 0                  | 0.53    | Difference in Saturated Fat (%)         | 14            | 746 | -0.064 [-0.335, 0.201] | 20                 | 0.61    |
| Fiber Intake (g/d)                      | 29            | 1024 | -0.001 [-0.006, 0.004] | 0                  | 0.70    | Fiber Intake (g/d)                      | 14            | 746 | -0.070 [-0.164, 0.023] | 12.2               | 0.13    |
| Change in Fiber Intake (g/d)            | 13            | 594  | -0.003 [-0.014, 0.008] | 0                  | 0.60    | Change in Fiber Intake (g/d)            | 7             | 490 | 0.057 [-0.075, 0.188]  | 0                  | 0.32    |
| Difference in Fiber Intake (g/d)        | 28            | 1008 | 0.001 [-0.008, 0.010]  | 0                  | 0.81    | Difference in Fiber Intake (g/d)        | 14            | 746 | -0.023 [-0.146, 0.101] | 20.7               | 0.70    |
| Baseline (mmol/L)                       | 29            | 1151 | 0.093 [0.000, 0.187]   | 4.4                | 0.05    | Baseline (mmHg)                         | 13            | 786 | 0.047 [-0.153, 0.246]  | 25.5               | 0.62    |
| Difference in Carbohydrate intake (%/d) | 32            | 1170 | 0.003 [-0.005, 0.011]  | 0.0                | 0.51    | Difference in Carbohydrate intake (%/d) | 14            | 746 | 0.052 [-0.049, 0.152]  | 13.5               | 0.28    |

  

| C. High-Density Lipoprotein Cholesterol |               |      |                        |                    |         | F. Fasting Glucose                      |               |     |                        |                    |         |
|-----------------------------------------|---------------|------|------------------------|--------------------|---------|-----------------------------------------|---------------|-----|------------------------|--------------------|---------|
| Subgroups                               | No. of Trials | N    | $\beta$ [95% CI]       | Residual $I^2$ (%) | P-value | Subgroups                               | No. of Trials | N   | $\beta$ [95% CI]       | Residual $I^2$ (%) | P-value |
| Nuts Dose (g/d)                         | 36            | 1613 | -0.001 [-0.002, 0.001] | 87                 | 0.4     | Nuts Dose (g/d)                         | 18            | 955 | 0.005 [-0.006, 0.015]  | 58.1               | 0.35    |
| Duration (weeks)                        | 36            | 1613 | 0.000 [-0.002, 0.002]  | 87                 | 0.91    | Duration (weeks)                        | 18            | 955 | 0.004 [-0.027, 0.035]  | 59                 | 0.78    |
| Saturated Fat (%)                       | 32            | 1321 | 0.004 [-0.008, 0.015]  | 84.7               | 0.50    | Saturated Fat (%)                       | 15            | 746 | 0.028 [-0.053, 0.109]  | 52.4               | 0.46    |
| Change in Saturated Fat (%)             | 17            | 926  | 0.008 [-0.011, 0.026]  | 79.7               | 0.4     | Change in Saturated Fat (%)             | 9             | 621 | -0.145 [-0.353, 0.064] | 48.1               | 0.15    |
| Difference in Saturated Fat (%)         | 32            | 1321 | 0.000 [-0.008, 0.009]  | 84.6               | 0.95    | Difference in Saturated Fat (%)         | 15            | 746 | -0.097 [-0.265, 0.072] | 50.4               | 0.24    |
| Fiber Intake (g/d)                      | 30            | 1137 | -0.000 [-0.004, 0.004] | 89.1               | 0.97    | Fiber Intake (g/d)                      | 14            | 746 | 0.001 [-0.028, 0.031]  | 57.9               | 0.92    |
| Change in Fiber Intake (g/d)            | 14            | 734  | -0.000 [-0.007, 0.007] | 85.6               | 0.97    | Change in Fiber Intake (g/d)            | 6             | 490 | 0.005 [-0.035, 0.045]  | 42.1               | 0.74    |
| Difference in Fiber Intake (g/d)        | 29            | 1177 | 0.002 [-0.003, 0.007]  | 87.3               | 0.33    | Difference in Fiber Intake (g/d)        | 14            | 746 | 0.000 [-0.038, 0.038]  | 57.9               | 0.99    |
| Baseline (mmol/L)                       | 30            | 1271 | 0.030 [-0.103, 0.163]  | 88.5               | 0.65    | Baseline (mmol/L)                       | 18            | 786 | -0.070 [-0.186, 0.045] | 53.9               | 0.21    |
| Difference in Carbohydrate intake (%/d) | 33            | 1359 | -0.001 [-0.006, 0.004] | 83.1               | 0.78    | Difference in Carbohydrate intake (%/d) | 16            | 746 | 0.022 [-0.030, 0.074]  | 54.5               | 0.38    |

N: number of participants in each subgroup.

Residual  $I^2$  was reported as a percent value, where  $I^2 \geq 50\%$  indicated "substantial" heterogeneity and  $\geq 75\%$  indicated "considerable" heterogeneity. P-value significance for heterogeneity was set as  $p < 0.10$ .

Appendix Figure 1. Cochrane risk of bias.

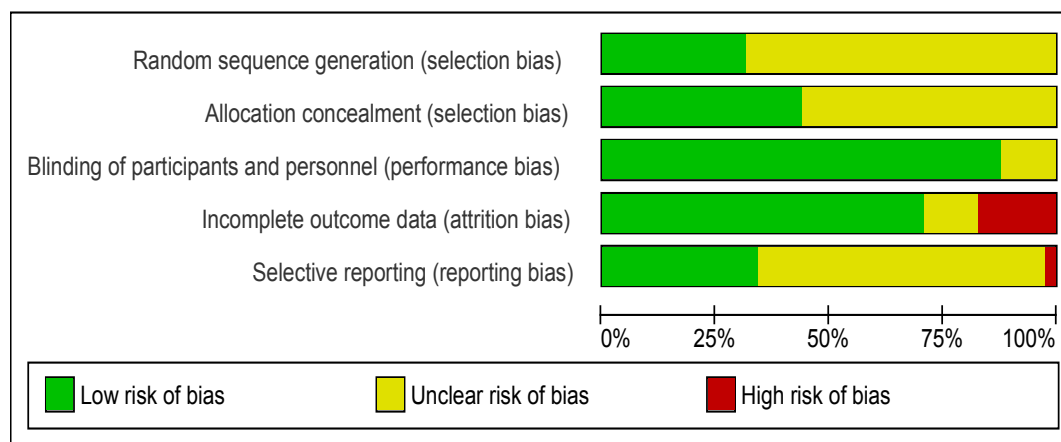

Review authors' judgements about each risk of bias item presented as percentages across all included studies.

## Appendix Figure 2. Forest plot of the RCTs of the effect of Tree Nuts on Waist Circumference

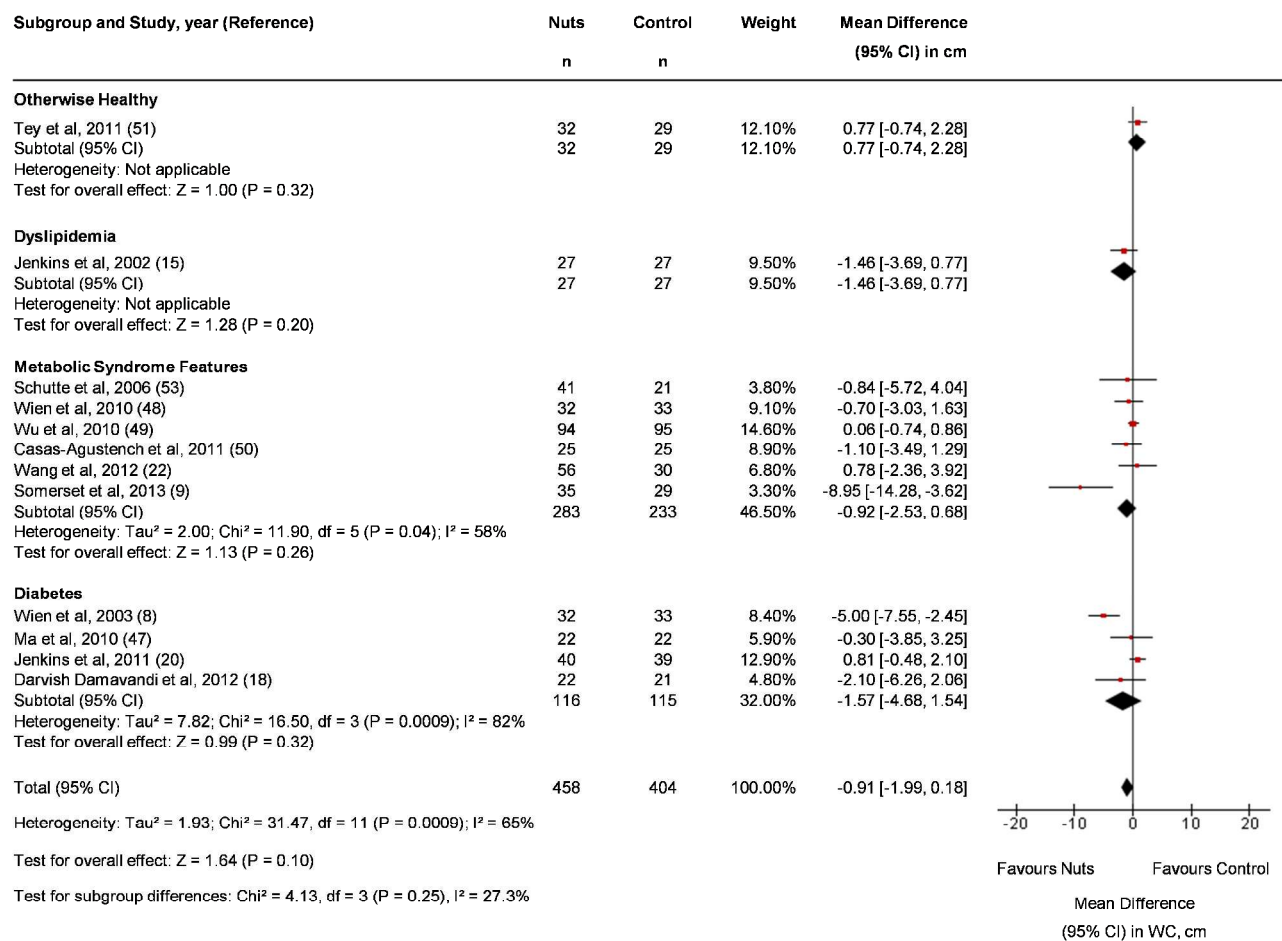

Pooled effect estimates are shown as diamonds, one each for trials conducted in otherwise healthy, dyslipidemia, metabolic syndrome criteria, diabetes and their combination (total). Paired analyses were applied to all crossover trials (2). Data are expressed as mean differences (MD) with 95% CI, using generic inverse-variance random-effects models. Interstudy heterogeneity was tested by using the Cochrane's Q statistic ( $I^2$ ) at a significance level of  $P < 0.10$  and quantified by  $I^2$ , levels  $\geq 50\%$  represent considerable heterogeneity and  $\geq 75\%$ , substantial heterogeneity. WC = waist circumference, cm = centimeters.

Appendix Figure 3. Forest plot of subgroup analyses for categorical variables for Waist Circumference

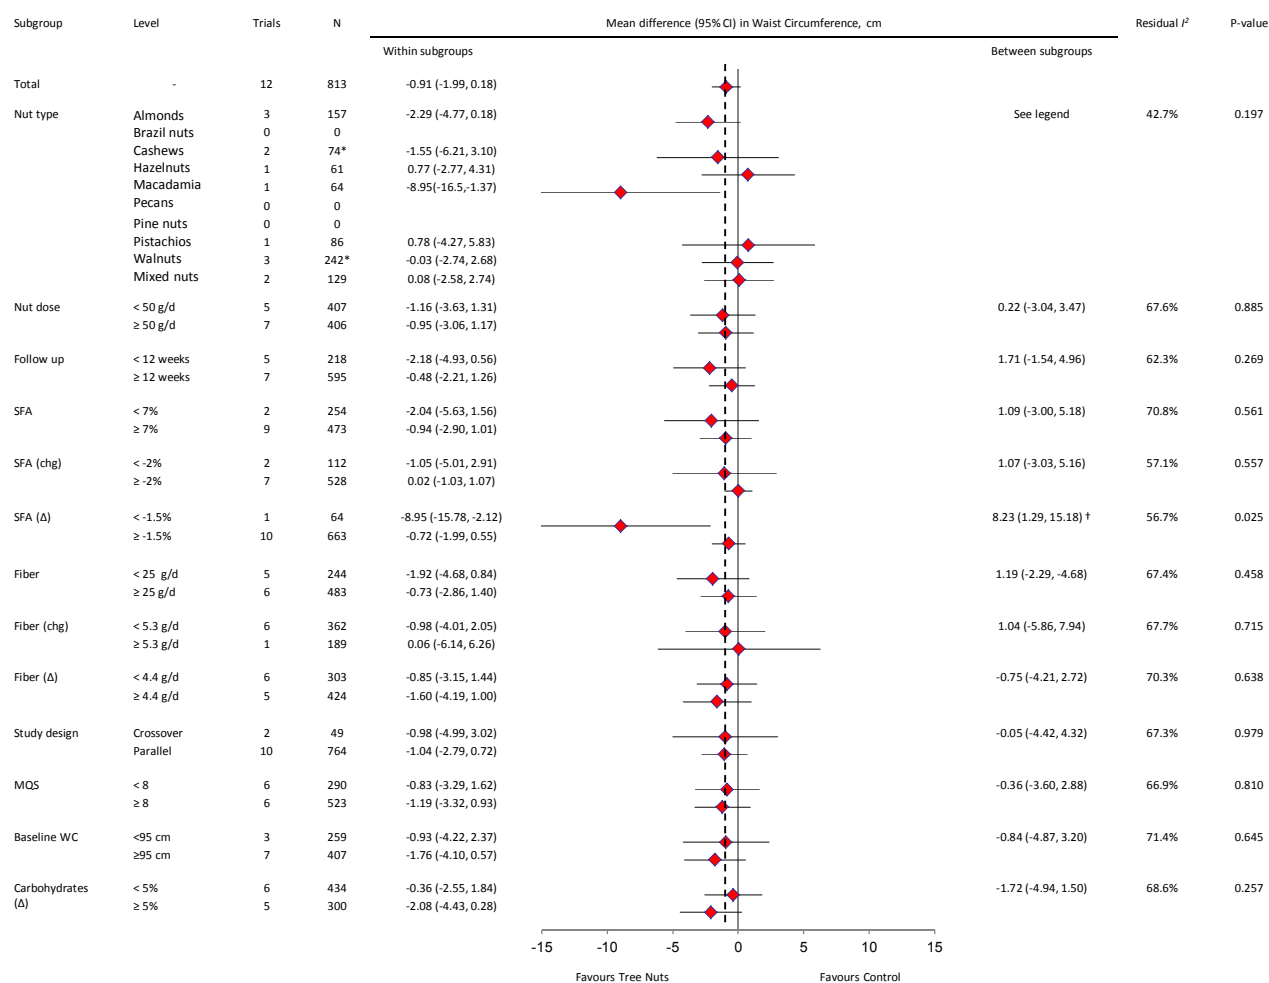

Point estimates for each subgroup level are the pooled effect estimates and are represented by diamonds. The dashed line represents the pooled effect estimate for the overall analysis. The residual I<sup>2</sup> value indicates the interstudy heterogeneity unexplained by the subgrouping. Pairwise between-subgroup mean differences (95% CIs) for nut type are not shown due to lack of statistical significance between groups. SFA = Saturated Fatty Acids, SFA (chg) = change within treatment diet for SFA, SFA (Δ) = difference between groups for SFA, Fiber (chg) = change within treatment diet for Fiber, Fiber (Δ) = difference between groups for SFA, MQS = Heyland Methodological Quality Score, WC = waist circumference, Carbohydrates (Δ) = difference between groups for carbohydrates.

\* Both nut types were studied within the same trial, for the sole purposes of number of participants, the control group was divided in half.



Appendix Figure 4. Forest plot of subgroup analyses for categorical variables for Triglycerides.

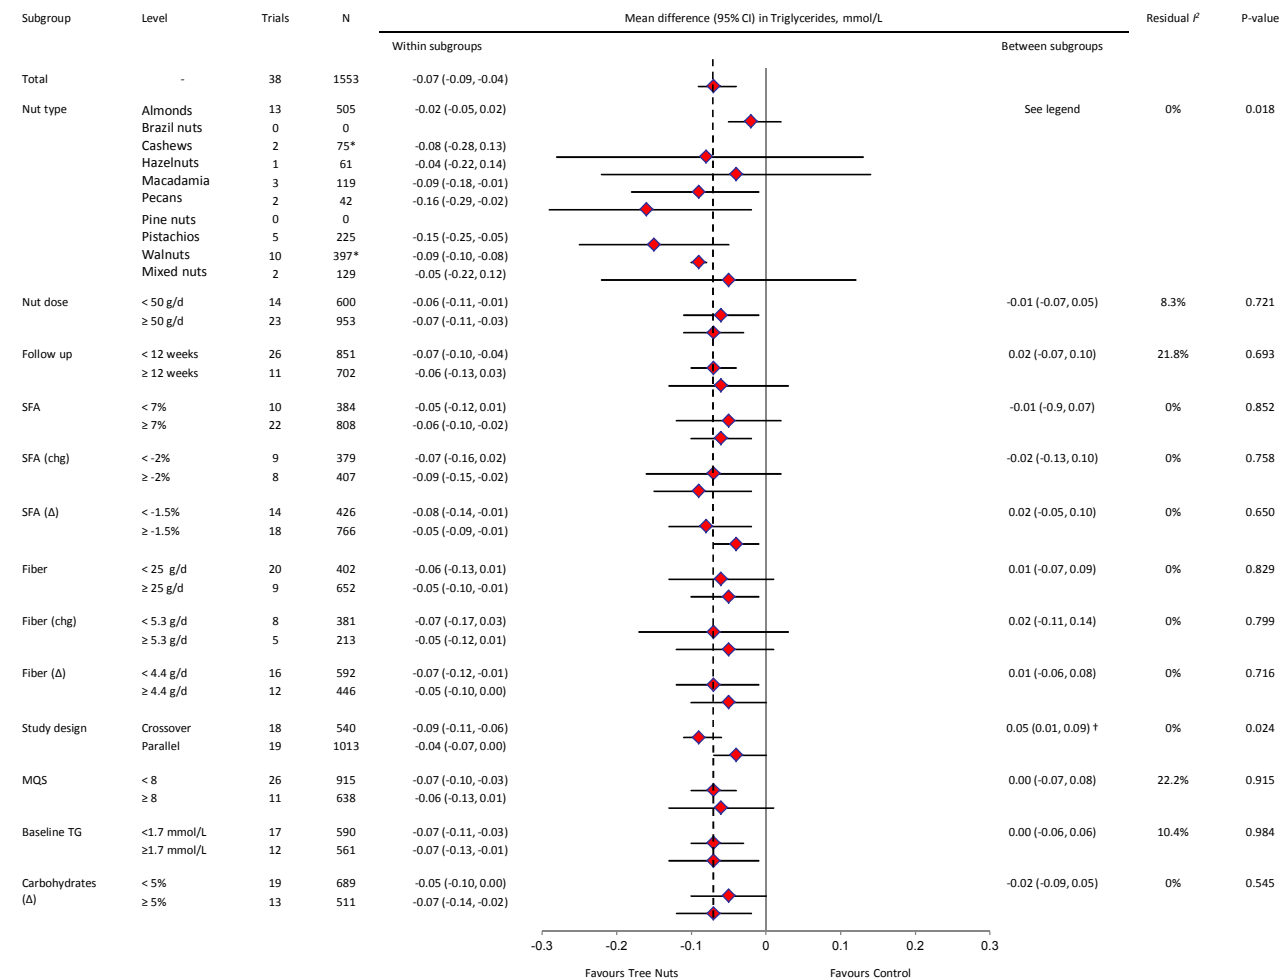

Point estimates within each subgroup level are the pooled effect estimates and are represented by diamonds. The dashed line represents the pooled effect estimate for the overall analysis. The residual I<sup>2</sup> value indicates the interstudy heterogeneity unexplained by the subgrouping. Significant pairwise between-subgroup mean differences (95% CIs) for nut types as follows: almonds vs. walnuts -0.07 mmol/L (-0.11, -0.04 mmol/L)†, almonds vs. pistachio -0.13 mmol/L (-0.24, -0.03 mmol/L)†, almonds vs. pecan -0.14 mmol/L (-0.28, -0.001 mmol/L) †|| others non-significant (P>0.05),. SFA = Saturated Fatty Acids, SFA (chg) = change within treatment diet for SFA, SFA (Δ) = difference between groups for SFA, Fiber (chg) = change within treatment diet for Fiber, Fiber (Δ) = difference between groups for SFA, MQS = Heyland Methodological Quality Score, TG = Triglycerides.

\* Both nut types were studied within the same trial, for the sole purposes of number of participants, the control group was divided in half.

† Statistically significant pairwise subgroup effect modification by meta-regression analysis (p< 0.05)

Appendix Figure 5. Forest plot of the RCTs investigating the effect of Tree Nuts on HDL-C.

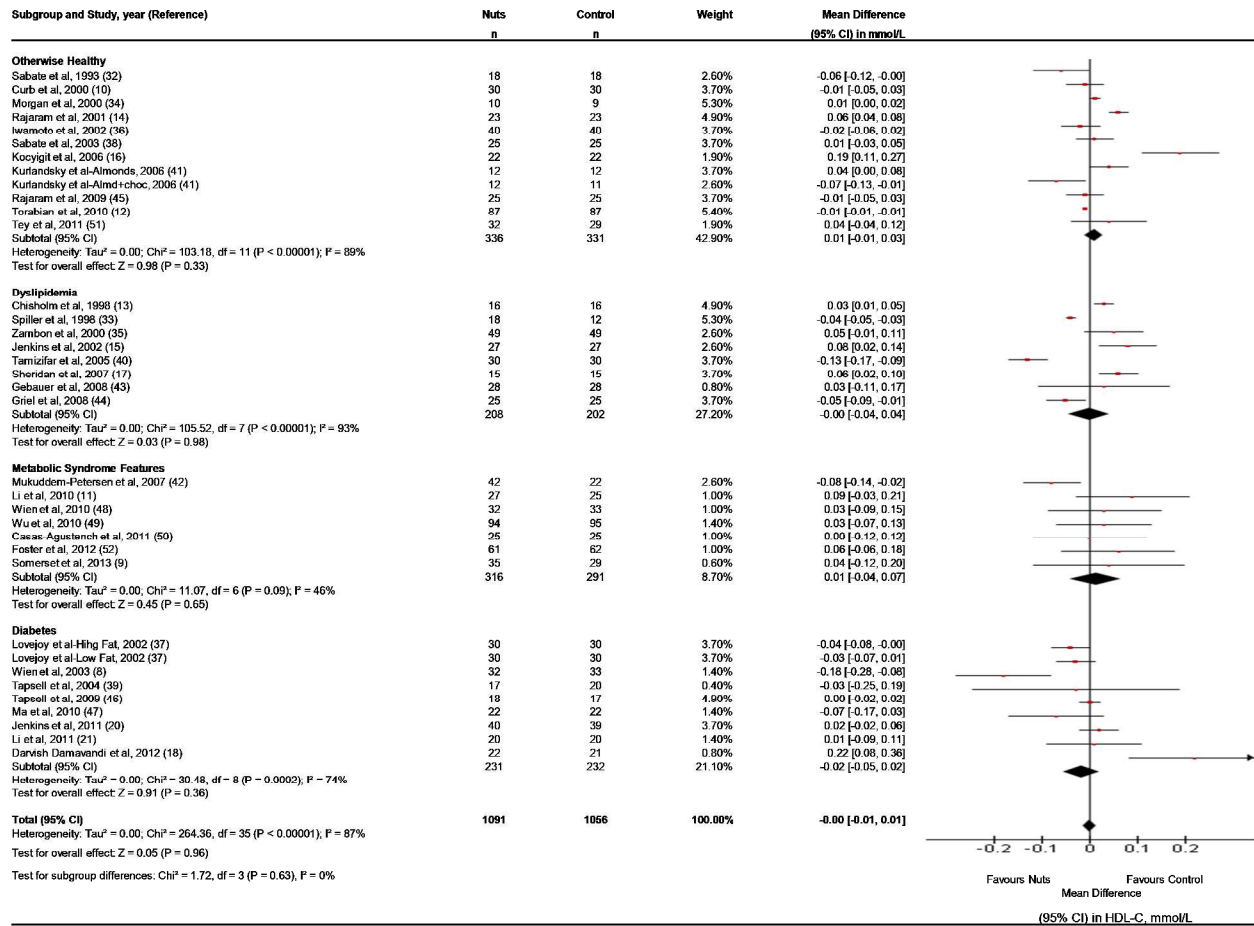

Pooled effect estimates are shown as diamonds, one each for trials conducted in otherwise healthy, dyslipidemia, metabolic syndrome criteria, diabetes and their combination (total). Paired analyses were applied to all crossover trials (15) and one substudy. Data are expressed as mean differences (MD) with 95% CI, using generic inverse-variance random-effects models. Interstudy heterogeneity was tested by using the Cochrane's Q statistic ( $I^2$ ) at a significance level of  $P < 0.10$  and quantified by  $I^2$ , levels  $\geq 50\%$  represent considerable heterogeneity and  $\geq 75\%$ , substantial heterogeneity. HDL-C = High-Density Lipoprotein Cholesterol, mmol/L = millimoles per liter, A = Almond, AC = Almond + Chocolate, HF = High Fat, LF = Low Fat.

Appendix Figure 6. Forest plot of subgroup analyses for categorical variables for HDL-C.

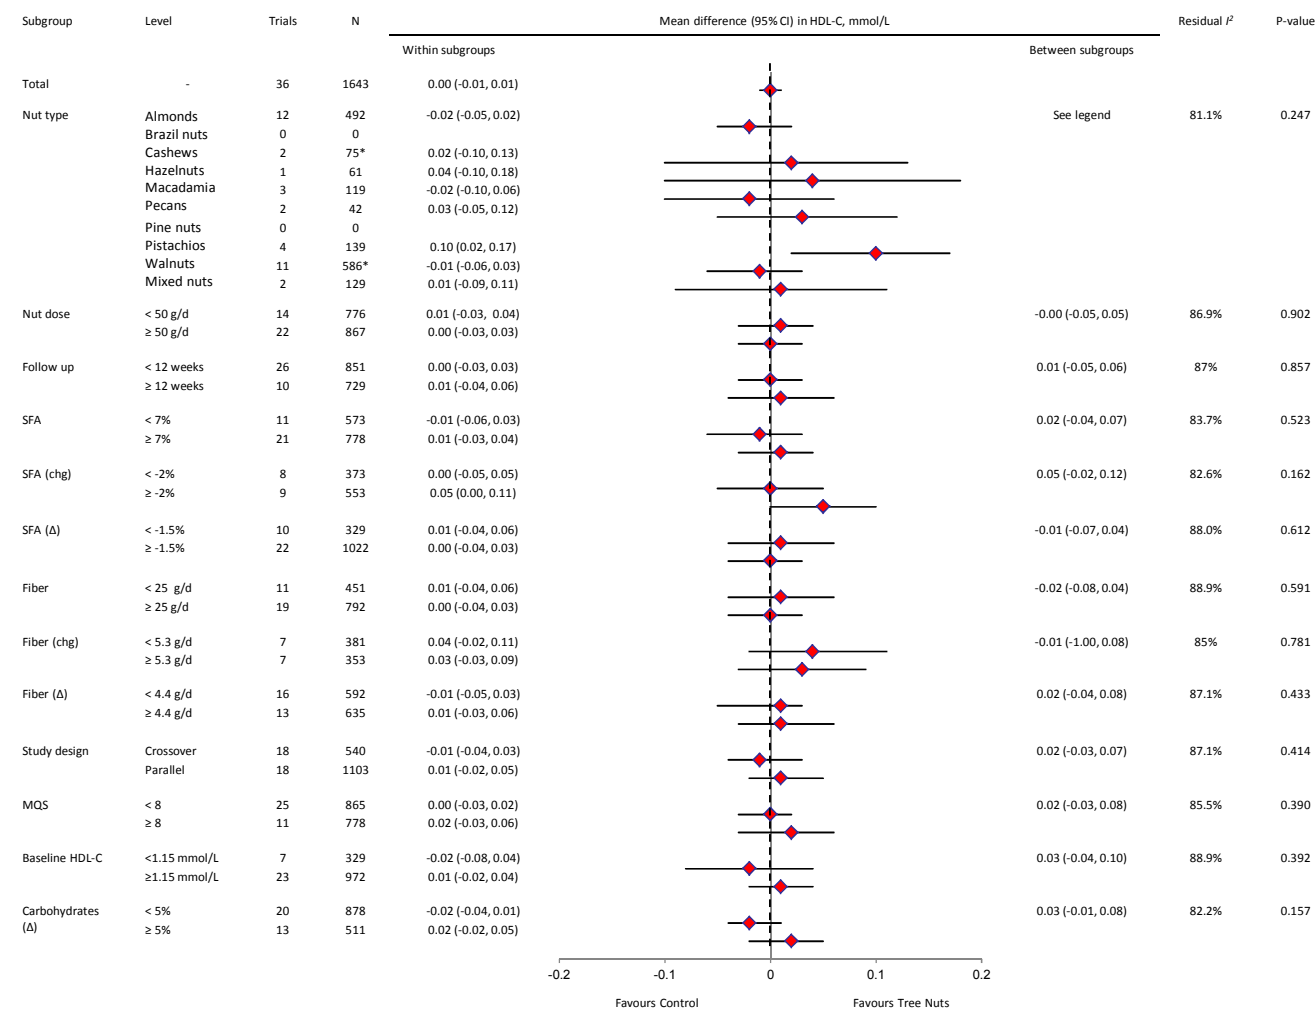

Point estimates for each subgroup level are the pooled effect estimates and are represented by diamonds. The dashed line represents the pooled effect estimate for the overall analysis. The residual I<sup>2</sup> value indicates the interstudy heterogeneity unexplained by the subgrouping. Pairwise between-subgroup mean differences (95% CIs) for nut type are not shown due to lack of statistical significance between groups. SFA = Saturated Fatty Acids, SFA (chg) = change within treatment diet for SFA, SFA (Δ) = difference between groups for SFA, Fiber (chg) = change within treatment diet for Fiber, Fiber (Δ) = difference between groups for Fiber, MQS = Heyland Methodological Quality Score, HDL-C = high-density lipoprotein cholesterol.

\* Both nut types were studied within the same trial, for the sole purposes of number of participants, the control group was divided in half.

**Appendix Figure 7A.** Forest plot of the RCTs investigating the effect of Tree Nuts on Systolic Blood Pressure.

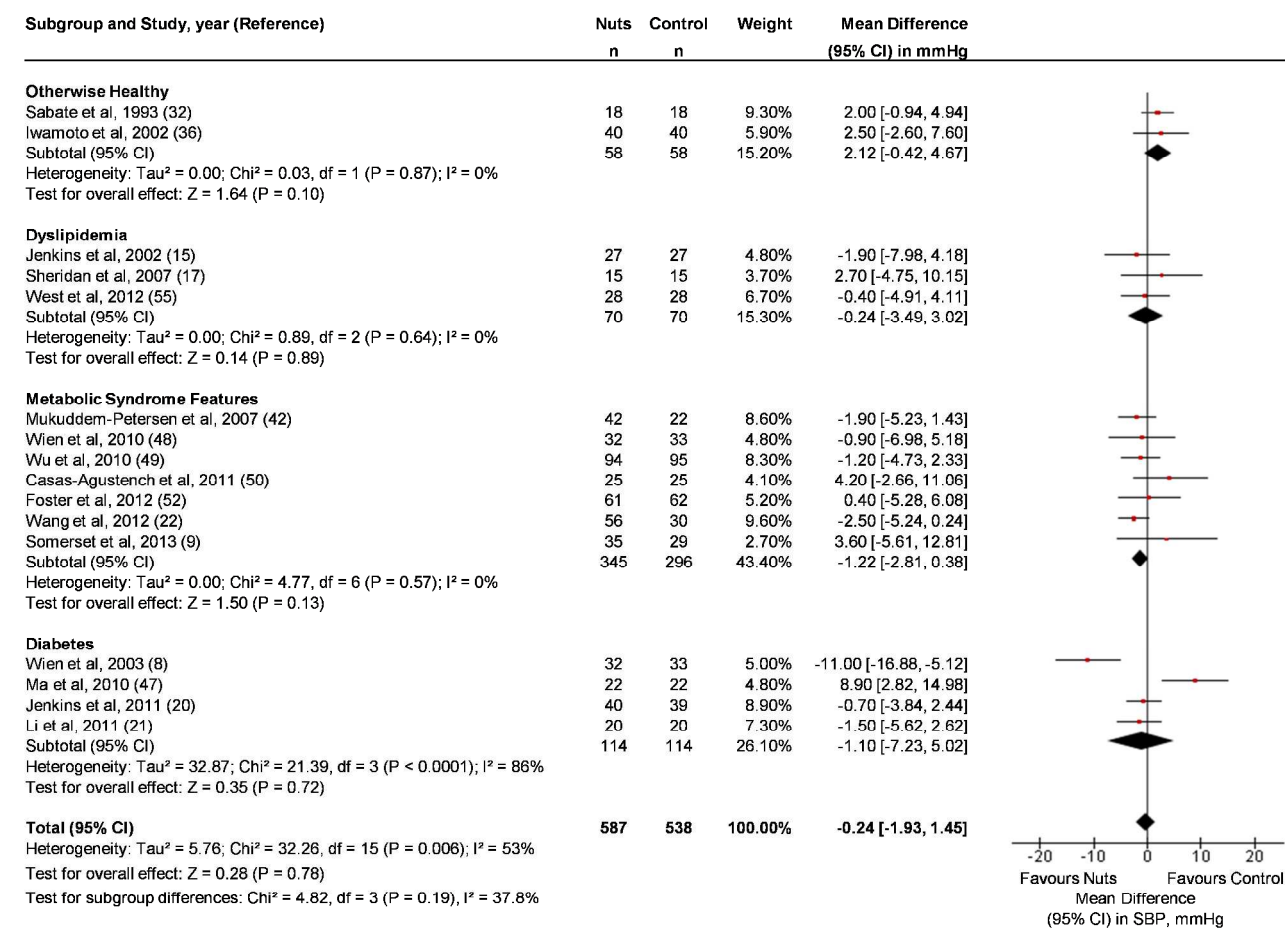

Pooled effect estimates are shown as diamonds, one each for trials conducted in otherwise healthy, dyslipidemia, metabolic syndrome criteria, diabetes and their combination (total). Paired analyses were applied to all crossover trials (7). Pooled effects are mean differences (MD) with 95% CI, using generic inverse-variance random-effects models. Interstudy heterogeneity was tested by using the Cochrane's Q statistic (I<sup>2</sup>) at a significance level of P<0.10 and quantified by I<sup>2</sup>, levels ≥50 % represent considerable heterogeneity and ≥75%, substantial heterogeneity. SBP = Systolic Blood Pressure, mmHg = millimeters of mercury.

## Appendix Figure 7B. Forest plot of the RCTs investigating the effect of Tree Nuts on Diastolic Blood Pressure.

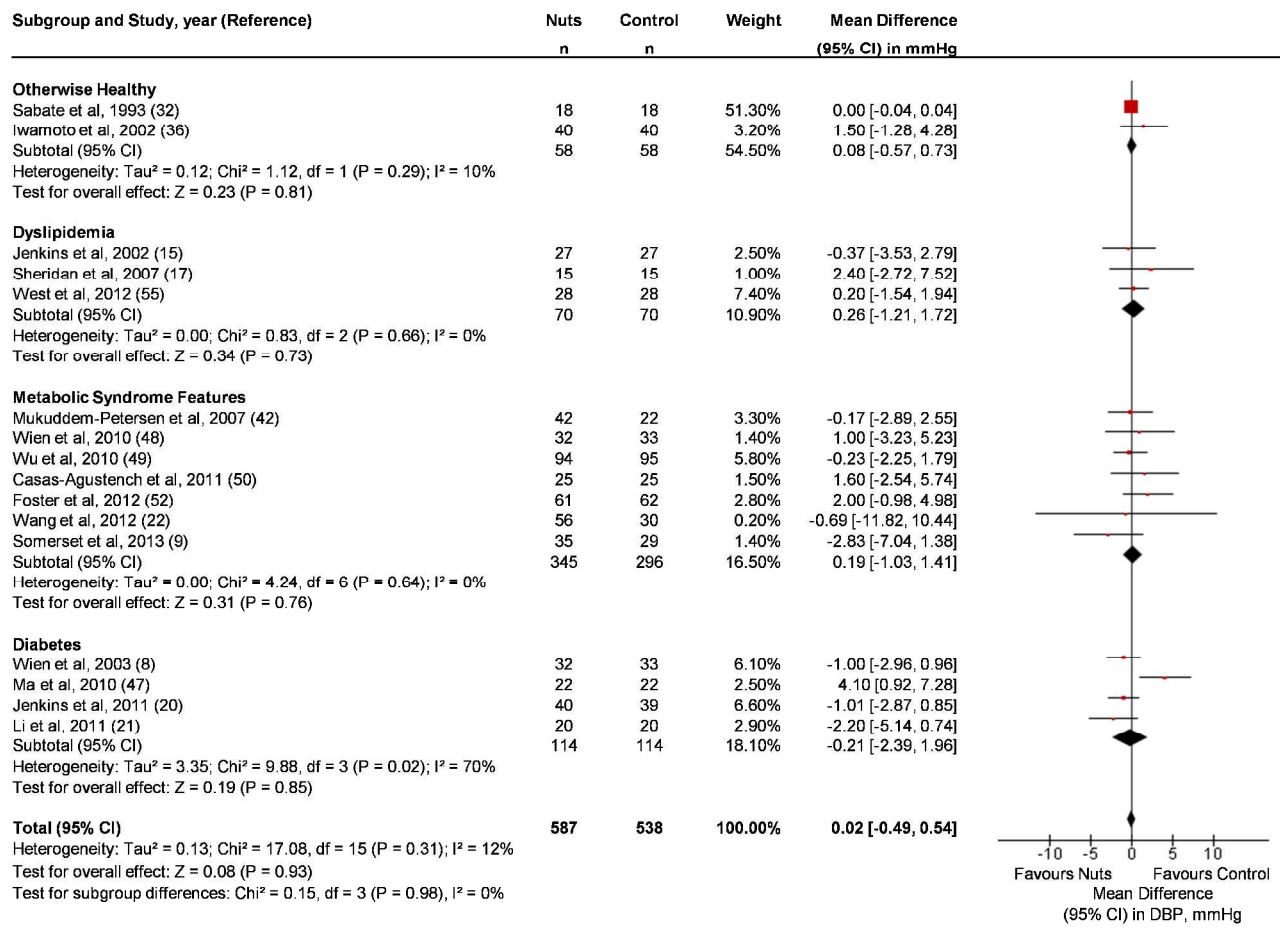

Pooled effect estimates are shown as diamonds, one each for trials conducted in otherwise healthy, dyslipidemia, metabolic syndrome criteria, diabetes and their combination (total). Paired analyses were applied to all crossover trials (7). Pooled effects are mean differences (MD) with 95% CI, using generic inverse-variance random-effects models. Interstudy heterogeneity was tested by using the Cochrane's Q statistic ( $I^2$ ) at a significance level of  $P < 0.10$  and quantified by  $I^2$ , levels  $\geq 50\%$  representing considerable heterogeneity and  $\geq 75\%$ , substantial heterogeneity. SBP = Systolic Blood Pressure, mmHg = millimeters of mercury.

Appendix Figure 8A. Forest plot of subgroup analyses for categorical variables for Systolic Blood Pressure.

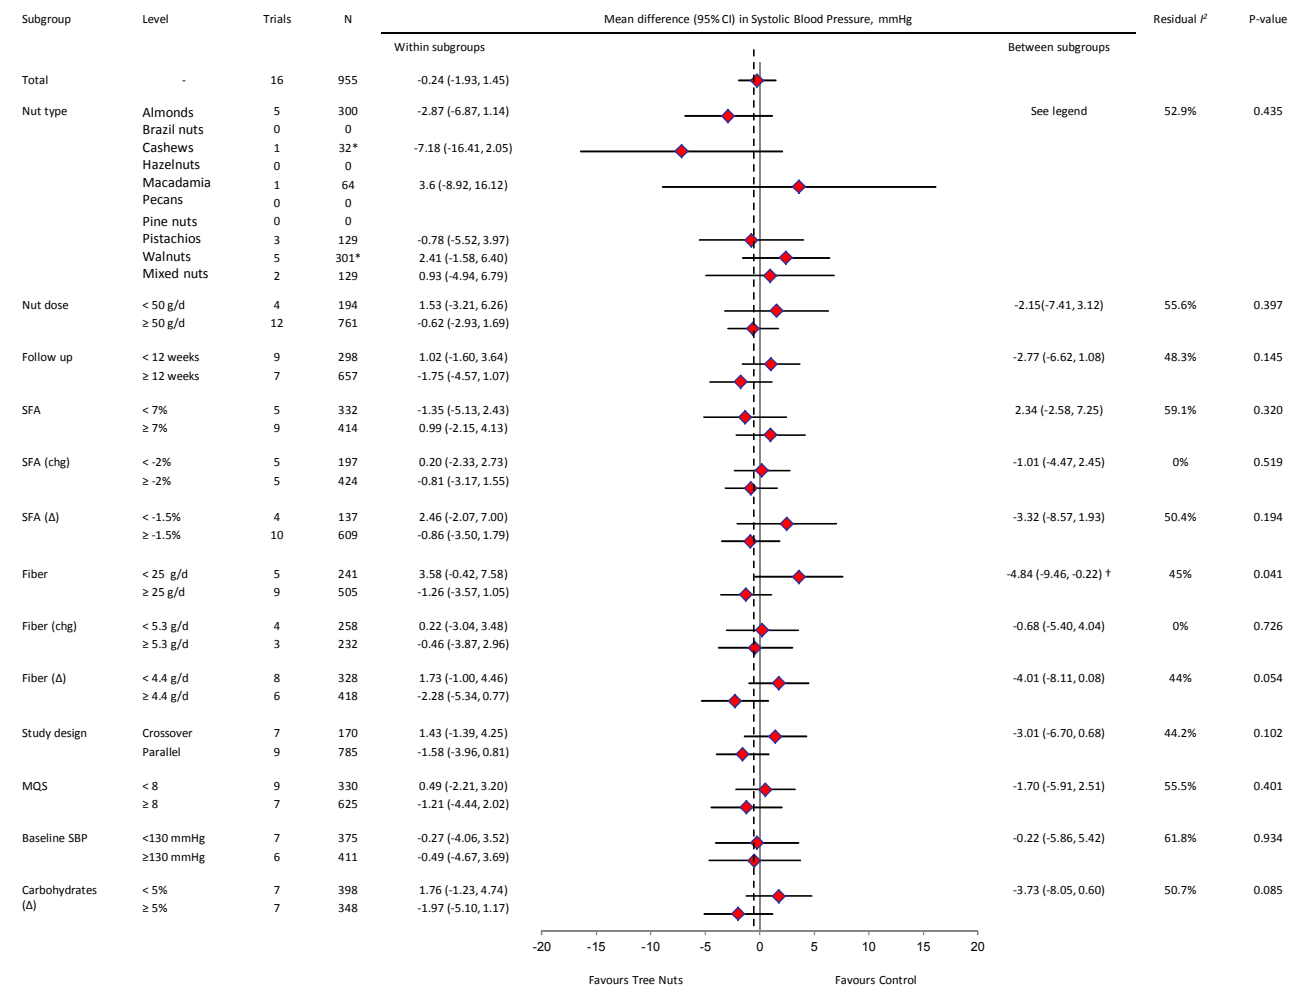

Point estimates for each subgroup level are the pooled effect estimates and are represented by diamonds. The dashed line represents the pooled effect estimate for the overall analysis. The residual I<sup>2</sup> value indicates the interstudy heterogeneity unexplained by the subgrouping. Pairwise between-subgroup mean differences (95% CIs) for nut type are not shown due to lack of statistical significance between groups. SFA = Saturated Fatty Acids, SFA (chg) = change within treatment diet for SFA, SFA (Δ) = difference between groups for SFA, Fiber (chg) = change within treatment diet for Fiber, Fiber (Δ) = difference between groups for SFA, MQS = Heyland Methodological Quality Score, SBP = systolic blood pressure.

\* Both nut types were studied within the same trial, for the sole purposes of number of participants, the control group was divided in half.

† Statistically significant pairwise subgroup effect modification by meta-regression analysis (p < 0.05).

## Appendix Figure 8B. Forest plot of subgroup analyses for categorical variables for Diastolic Blood Pressure.

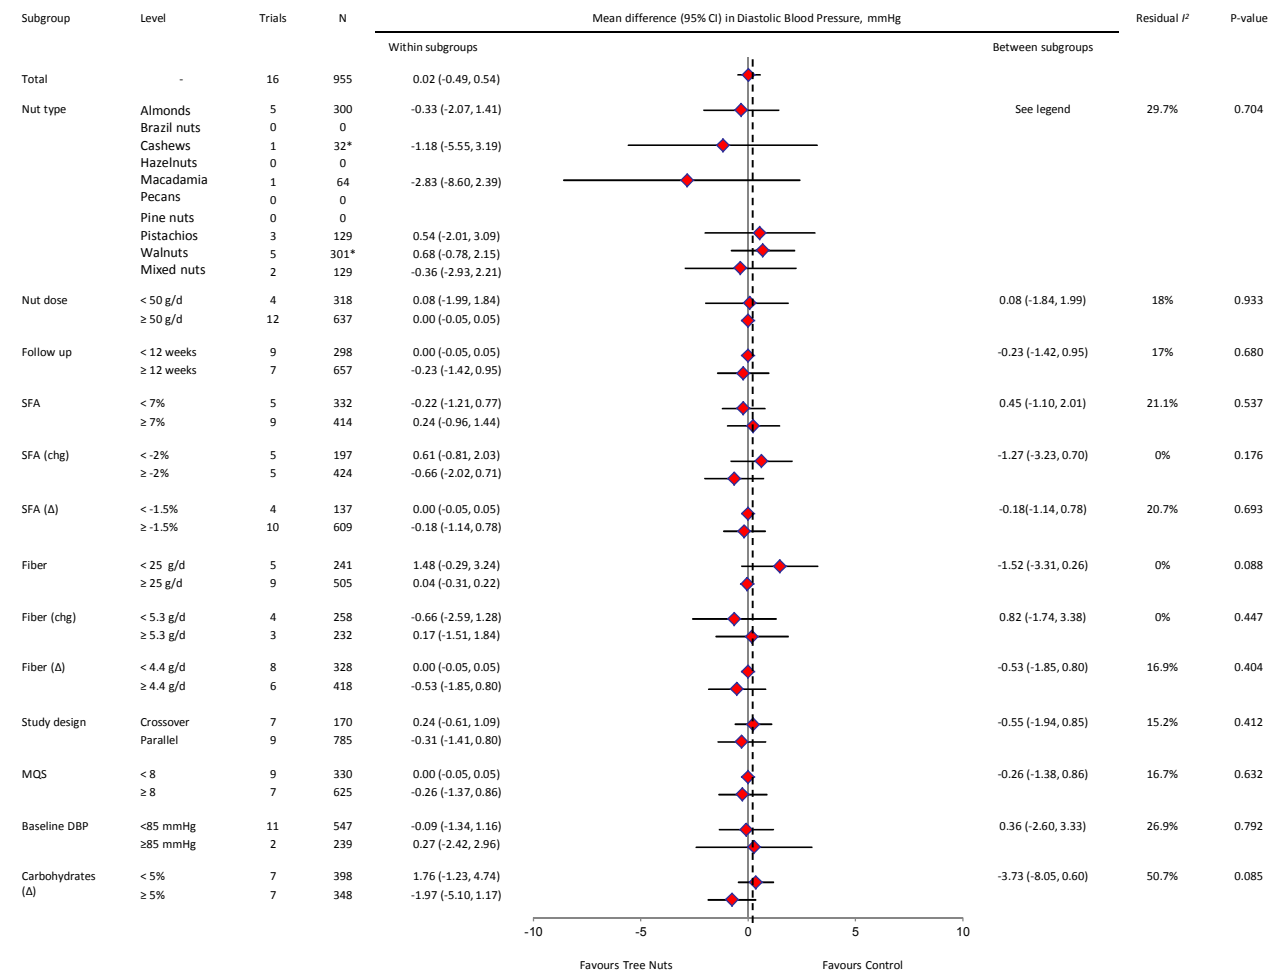

Point estimates for each subgroup level are the pooled effect estimates and are represented by diamonds. The dashed line represents the pooled effect estimate for the overall analysis. The residual  $I^2$  value indicates the interstudy heterogeneity unexplained by the subgrouping. Pairwise between-subgroup mean differences (95% CIs) for nut type are not shown due to lack of statistical significance between groups. SFA = Saturated Fatty Acids, SFA (chg) = change within treatment diet for SFA, SFA (Δ) = difference between groups for SFA, Fiber (chg) = change within treatment diet for Fiber, Fiber (Δ) = difference between groups for SFA, MQS = Heyland Methodological Quality Score, DBP = diastolic blood pressure.

\* Both nut types were studied within the same trial, for the sole purposes of number of participants, the control group was divided in half.



**Appendix Figure 9.** Forest plot of the RCTs investigating the effect of Tree Nuts on Fasting Blood Glucose.

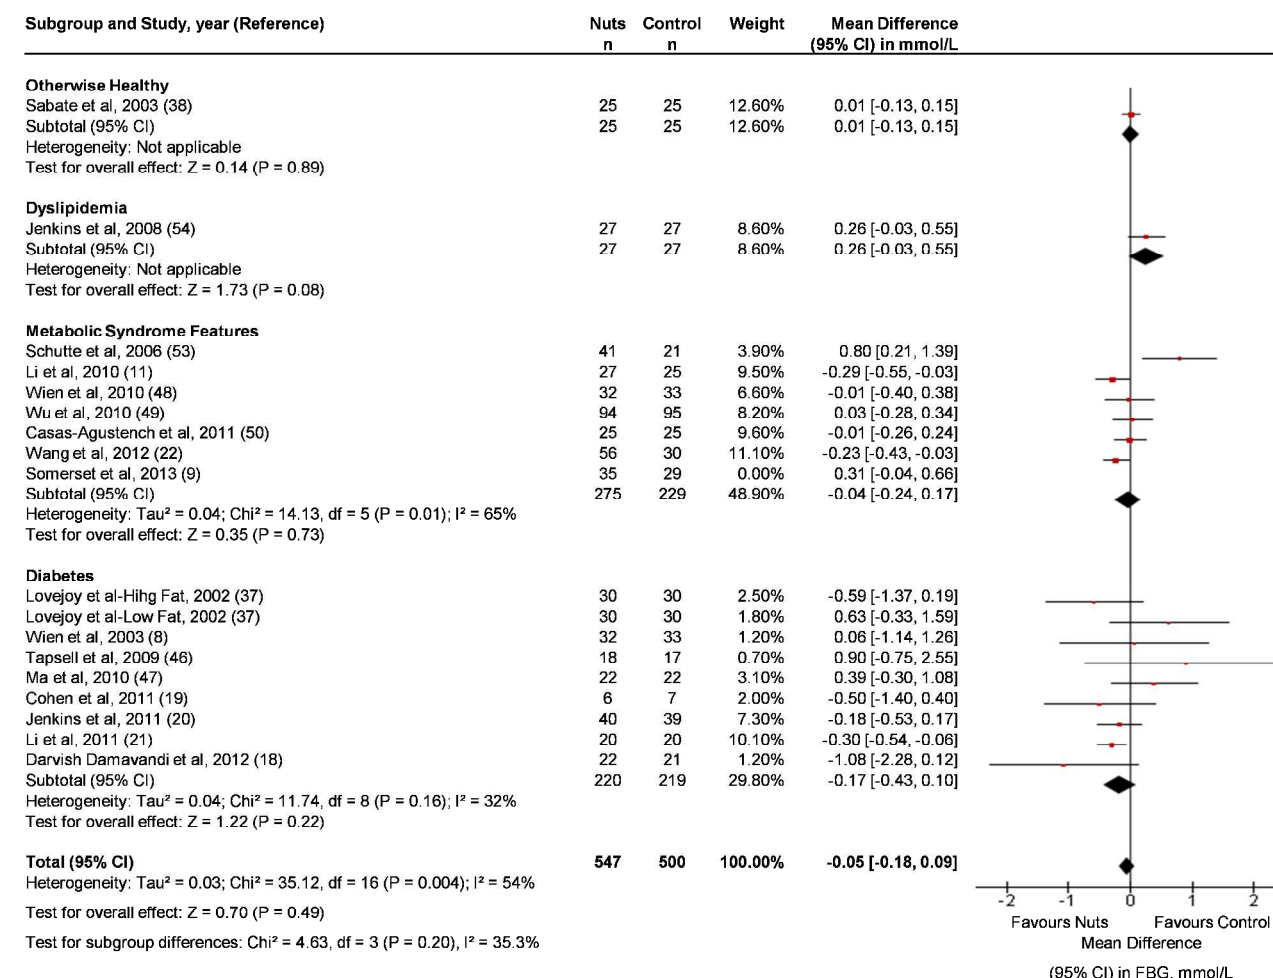

Pooled effect estimates are shown as diamonds, one each for trials conducted in otherwise healthy, dyslipidemia, metabolic syndrome criteria, diabetes and their combination (total). Paired analyses were applied to all crossover trials (5) and one substudy. Data are expressed as mean differences (MD) with 95% CI, using generic inverse-variance random-effects models. Interstudy heterogeneity was tested by using the Cochrane's Q statistic (I<sup>2</sup>) at a significance level of P<0.10 and quantified by I<sup>2</sup>, levels ≥50 % represent considerable heterogeneity and ≥75%, substantial heterogeneity. FBG = Fasting Blood Glucose; mmol/L = mill moles per liter; HF = High Fat; LF = Low Fat.

## Appendix Figure 10. Forest plot of subgroup analyses for categorical variables.

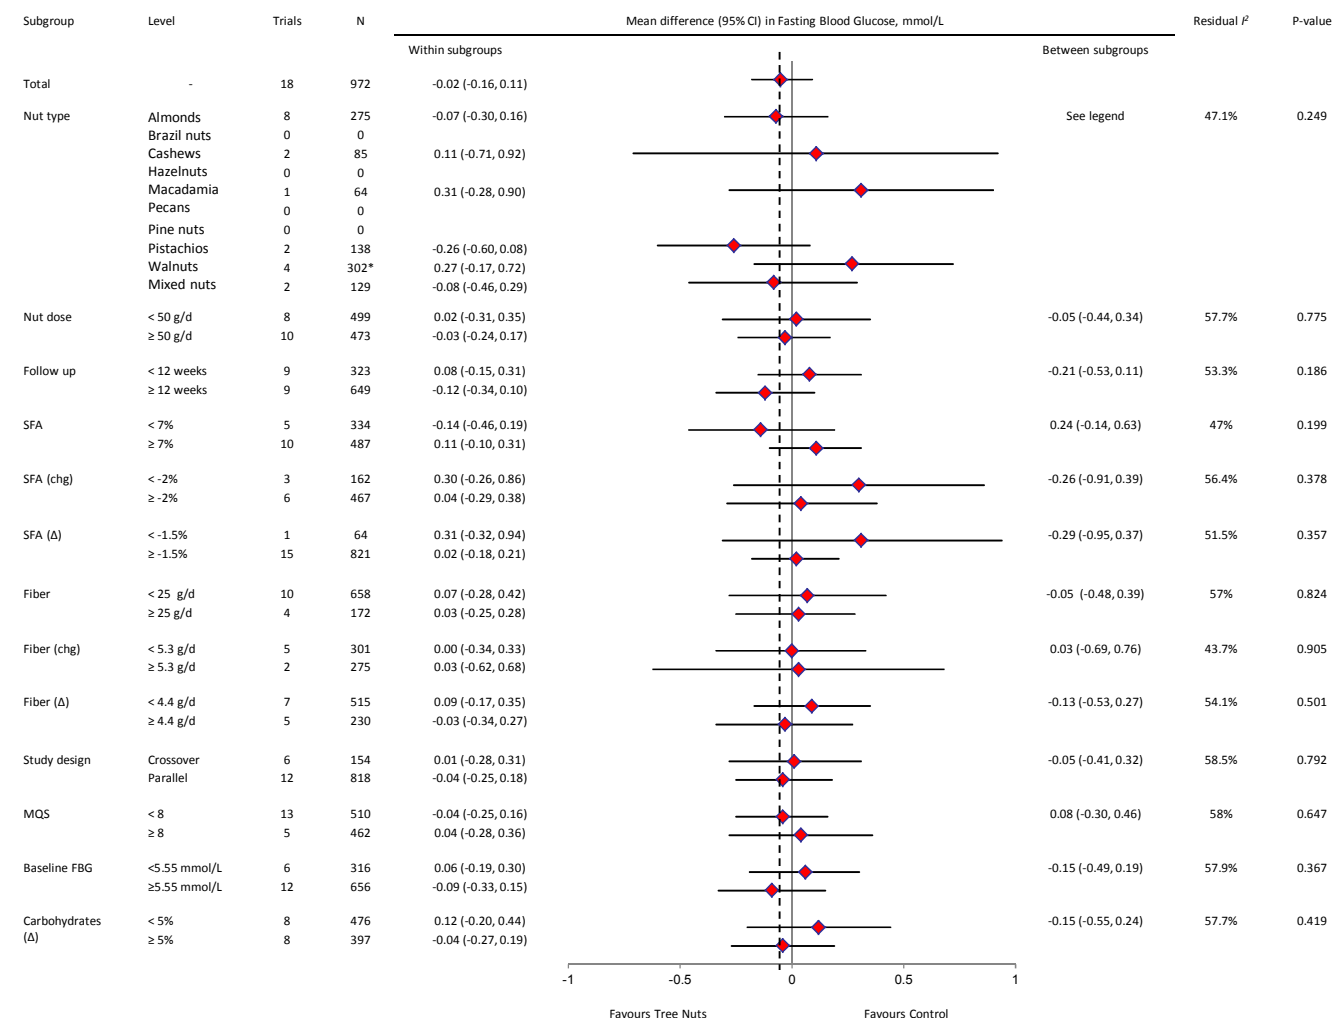

Point estimates for each subgroup level are the pooled effect estimates and are represented by diamonds. The dashed line represents the pooled effect estimate for the overall analysis. The residual I<sup>2</sup> value indicates the interstudy heterogeneity unexplained by the subgrouping. Pairwise between-subgroup mean differences (95% CIs) for nut are not shown due to lack of statistical significance. SFA = Saturated Fatty Acids, SFA (chg) = change within treatment diet for SFA, SFA (Δ) = difference between groups for SFA, Fiber (chg) = change within treatment diet for Fiber, Fiber (Δ) = difference between groups for SFA, MQS = Heyland Methodological Quality Score, FG = fasting glucose.

\* Both nut types were studied within the same trial, for the sole purposes of number of participants, the control group was divided in half.

Appendix Figure 11. Funnel plots for evidence of publication bias.

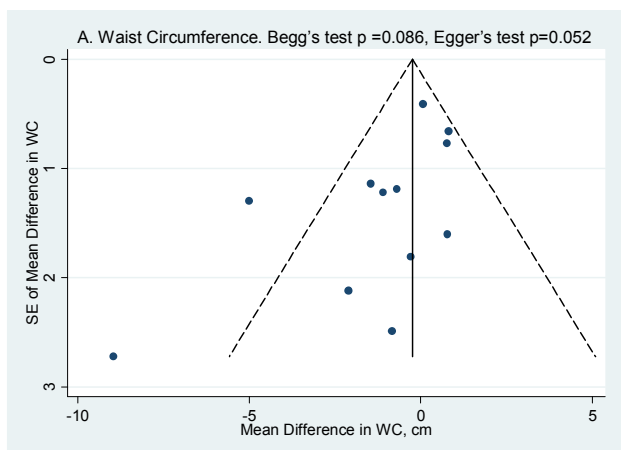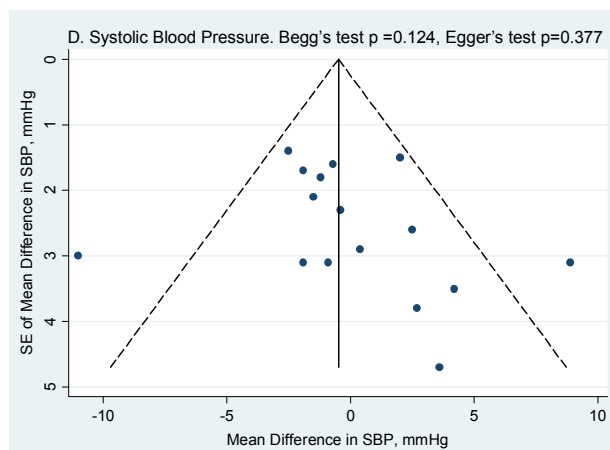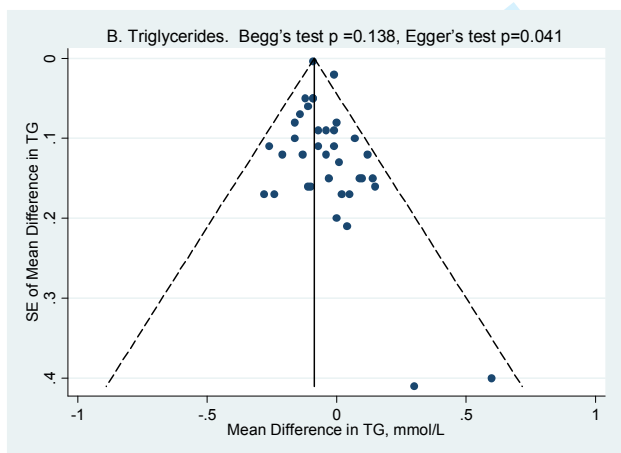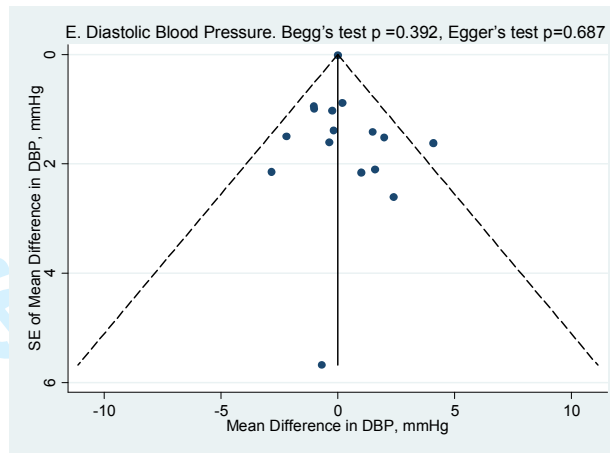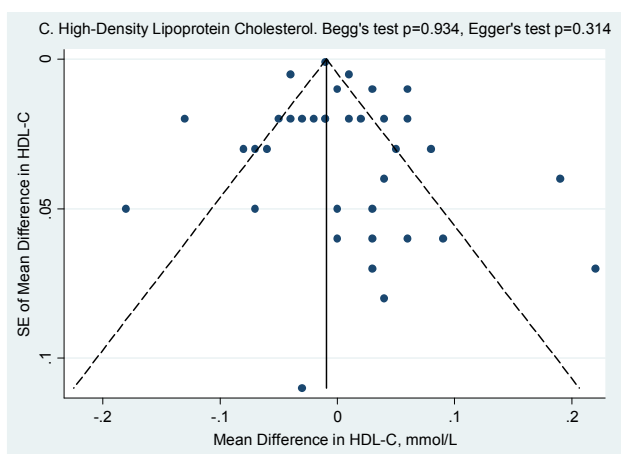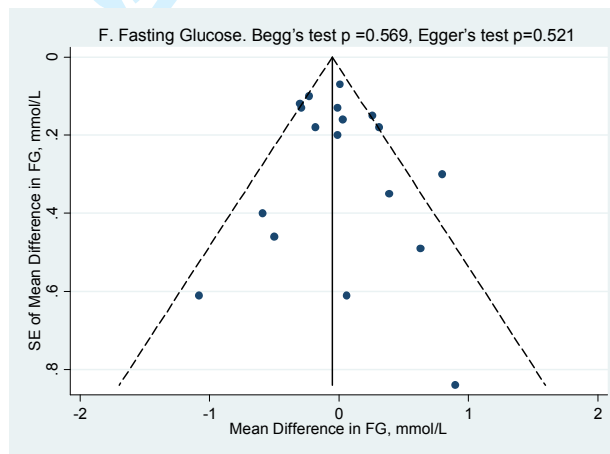

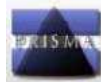

# PRISMA 2009 Checklist

1  
2  
3  
4  
5  
6  
7  
8  
9  
10  
11  
12  
13  
14  
15  
16  
17  
18  
19  
20  
21  
22  
23  
24  
25  
26  
27  
28  
29  
30  
31  
32  
33  
34  
35  
36  
37  
38  
39  
40  
41  
42  
43  
44  
45  
46  
47  
48  
49

| Section/topic                      | #  | Checklist item                                                                                                                                                                                                                                                                                              | Reported on page # |
|------------------------------------|----|-------------------------------------------------------------------------------------------------------------------------------------------------------------------------------------------------------------------------------------------------------------------------------------------------------------|--------------------|
| <b>TITLE</b>                       |    |                                                                                                                                                                                                                                                                                                             |                    |
| Title                              | 1  | Identify the report as a systematic review, meta-analysis, or both.                                                                                                                                                                                                                                         | 1                  |
| <b>ABSTRACT</b>                    |    |                                                                                                                                                                                                                                                                                                             |                    |
| Structured summary                 | 2  | Provide a structured summary including, as applicable: background; objectives; data sources; study eligibility criteria, participants, and interventions; study appraisal and synthesis methods; results; limitations; conclusions and implications of key findings; systematic review registration number. | 2                  |
| <b>INTRODUCTION</b>                |    |                                                                                                                                                                                                                                                                                                             |                    |
| Rationale                          | 3  | Describe the rationale for the review in the context of what is already known.                                                                                                                                                                                                                              | 3                  |
| Objectives                         | 4  | Provide an explicit statement of questions being addressed with reference to participants, interventions, comparisons, outcomes, and study design (PICOS).                                                                                                                                                  | 3                  |
| <b>METHODS</b>                     |    |                                                                                                                                                                                                                                                                                                             |                    |
| Protocol and registration          | 5  | Indicate if a review protocol exists, if and where it can be accessed (e.g., Web address), and, if available, provide registration information including registration number.                                                                                                                               | 4                  |
| Eligibility criteria               | 6  | Specify study characteristics (e.g., PICOS, length of follow-up) and report characteristics (e.g., years considered, language, publication status) used as criteria for eligibility, giving rationale.                                                                                                      | 4                  |
| Information sources                | 7  | Describe all information sources (e.g., databases with dates of coverage, contact with study authors to identify additional studies) in the search and date last searched.                                                                                                                                  | 4                  |
| Search                             | 8  | Present full electronic search strategy for at least one database, including any limits used, such that it could be repeated.                                                                                                                                                                               | 4                  |
| Study selection                    | 9  | State the process for selecting studies (i.e., screening, eligibility, included in systematic review, and, if applicable, included in the meta-analysis).                                                                                                                                                   | 4                  |
| Data collection process            | 10 | Describe method of data extraction from reports (e.g., piloted forms, independently, in duplicate) and any processes for obtaining and confirming data from investigators.                                                                                                                                  | 5                  |
| Data items                         | 11 | List and define all variables for which data were sought (e.g., PICOS, funding sources) and any assumptions and simplifications made.                                                                                                                                                                       | 5                  |
| Risk of bias in individual studies | 12 | Describe methods used for assessing risk of bias of individual studies (including specification of whether this was done at the study or outcome level), and how this information is to be used in any data synthesis.                                                                                      | 5                  |
| Summary measures                   | 13 | State the principal summary measures (e.g., risk ratio, difference in means).                                                                                                                                                                                                                               | 6                  |
| Synthesis of results               | 14 | Describe the methods of handling data and combining results of studies, if done, including measures of consistency (e.g., $I^2$ for each meta-analysis).                                                                                                                                                    | 6                  |

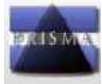

# PRISMA 2009 Checklist

Page 1 of 2

| Section/topic                 | #  | Checklist item                                                                                                                                                                                           | Reported on page # |
|-------------------------------|----|----------------------------------------------------------------------------------------------------------------------------------------------------------------------------------------------------------|--------------------|
| Risk of bias across studies   | 15 | Specify any assessment of risk of bias that may affect the cumulative evidence (e.g., publication bias, selective reporting within studies).                                                             | 6                  |
| Additional analyses           | 16 | Describe methods of additional analyses (e.g., sensitivity or subgroup analyses, meta-regression), if done, indicating which were pre-specified.                                                         | 7                  |
| <b>RESULTS</b>                |    |                                                                                                                                                                                                          |                    |
| Study selection               | 17 | Give numbers of studies screened, assessed for eligibility, and included in the review, with reasons for exclusions at each stage, ideally with a flow diagram.                                          | 7                  |
| Study characteristics         | 18 | For each study, present characteristics for which data were extracted (e.g., study size, PICOS, follow-up period) and provide the citations.                                                             | 8                  |
| Risk of bias within studies   | 19 | Present data on risk of bias of each study and, if available, any outcome level assessment (see item 12).                                                                                                | 9                  |
| Results of individual studies | 20 | For all outcomes considered (benefits or harms), present, for each study: (a) simple summary data for each intervention group (b) effect estimates and confidence intervals, ideally with a forest plot. | 9                  |
| Synthesis of results          | 21 | Present results of each meta-analysis done, including confidence intervals and measures of consistency.                                                                                                  | 9                  |
| Risk of bias across studies   | 22 | Present results of any assessment of risk of bias across studies (see Item 15).                                                                                                                          | 12                 |
| Additional analysis           | 23 | Give results of additional analyses, if done (e.g., sensitivity or subgroup analyses, meta-regression [see Item 16]).                                                                                    | 9                  |
| <b>DISCUSSION</b>             |    |                                                                                                                                                                                                          |                    |
| Summary of evidence           | 24 | Summarize the main findings including the strength of evidence for each main outcome; consider their relevance to key groups (e.g., healthcare providers, users, and policy makers).                     | 12                 |
| Limitations                   | 25 | Discuss limitations at study and outcome level (e.g., risk of bias), and at review-level (e.g., incomplete retrieval of identified research, reporting bias).                                            | 15                 |
| Conclusions                   | 26 | Provide a general interpretation of the results in the context of other evidence, and implications for future research.                                                                                  | 16                 |
| <b>FUNDING</b>                |    |                                                                                                                                                                                                          |                    |
| Funding                       | 27 | Describe sources of funding for the systematic review and other support (e.g., supply of data); role of funders for the systematic review.                                                               | 16                 |

From: Moher D, Liberati A, Tetzlaff J, Altman DG, The PRISMA Group (2009). Preferred Reporting Items for Systematic Reviews and Meta-Analyses: The PRISMA Statement. PLoS Med 6(6): e1000097. doi:10.1371/journal.pmed1000097

For more information, visit: [www.prisma-statement.org](http://www.prisma-statement.org).

Page 2 of 2

For peer review only - <http://bmjopen.bmj.com/site/about/guidelines.xhtml>

# BMJ Open

## EFFECT OF TREE NUTS ON METABOLIC SYNDROME CRITERIA: A SYSTEMATIC REVIEW AND META-ANALYSIS OF RANDOMIZED CONTROLLED TRIALS

|                               |                                                                                                                                                                                                                                                                                                                                                                                                                                                                                                                                                                                                                                                                                                                                                                                                                                                                                                                                                                                                                                                                                                                                                                                                                                                                                                                                                                                                                                                                                                                                                                                                                                                                                                                                                                                                                                                                                                                                                                                                                                                                                                                                                                                                                                                                                                                                                                                                                                                            |
|-------------------------------|------------------------------------------------------------------------------------------------------------------------------------------------------------------------------------------------------------------------------------------------------------------------------------------------------------------------------------------------------------------------------------------------------------------------------------------------------------------------------------------------------------------------------------------------------------------------------------------------------------------------------------------------------------------------------------------------------------------------------------------------------------------------------------------------------------------------------------------------------------------------------------------------------------------------------------------------------------------------------------------------------------------------------------------------------------------------------------------------------------------------------------------------------------------------------------------------------------------------------------------------------------------------------------------------------------------------------------------------------------------------------------------------------------------------------------------------------------------------------------------------------------------------------------------------------------------------------------------------------------------------------------------------------------------------------------------------------------------------------------------------------------------------------------------------------------------------------------------------------------------------------------------------------------------------------------------------------------------------------------------------------------------------------------------------------------------------------------------------------------------------------------------------------------------------------------------------------------------------------------------------------------------------------------------------------------------------------------------------------------------------------------------------------------------------------------------------------------|
| Journal:                      | <i>BMJ Open</i>                                                                                                                                                                                                                                                                                                                                                                                                                                                                                                                                                                                                                                                                                                                                                                                                                                                                                                                                                                                                                                                                                                                                                                                                                                                                                                                                                                                                                                                                                                                                                                                                                                                                                                                                                                                                                                                                                                                                                                                                                                                                                                                                                                                                                                                                                                                                                                                                                                            |
| Manuscript ID:                | bmjopen-2013-004660.R1                                                                                                                                                                                                                                                                                                                                                                                                                                                                                                                                                                                                                                                                                                                                                                                                                                                                                                                                                                                                                                                                                                                                                                                                                                                                                                                                                                                                                                                                                                                                                                                                                                                                                                                                                                                                                                                                                                                                                                                                                                                                                                                                                                                                                                                                                                                                                                                                                                     |
| Article Type:                 | Research                                                                                                                                                                                                                                                                                                                                                                                                                                                                                                                                                                                                                                                                                                                                                                                                                                                                                                                                                                                                                                                                                                                                                                                                                                                                                                                                                                                                                                                                                                                                                                                                                                                                                                                                                                                                                                                                                                                                                                                                                                                                                                                                                                                                                                                                                                                                                                                                                                                   |
| Date Submitted by the Author: | 13-Jun-2014                                                                                                                                                                                                                                                                                                                                                                                                                                                                                                                                                                                                                                                                                                                                                                                                                                                                                                                                                                                                                                                                                                                                                                                                                                                                                                                                                                                                                                                                                                                                                                                                                                                                                                                                                                                                                                                                                                                                                                                                                                                                                                                                                                                                                                                                                                                                                                                                                                                |
| Complete List of Authors:     | <p>Blanco Mejia, Sonia; University of Toronto, Department of Nutritional Sciences, Faculty of Medicine; St. Michael's Hospital, Toronto 3D Knowledge Synthesis and Clinical Trials Unit, Clinical Nutrition and Risk Factor Modification Centre</p> <p>Kendall, Cyril; University of Toronto, Department of Nutritional Sciences, Faculty of Medicine; University of Saskatchewan, College of Pharmacy and Nutrition</p> <p>Viguioliouk, Effie; University of Toronto, Department of Nutritional Sciences, Faculty of Medicine; St. Michael's Hospital, Toronto 3D Knowledge Synthesis and Clinical Trials Unit, Clinical Nutrition and Risk Factor Modification Centre</p> <p>Augustin, Livia; University of Toronto, Department of Nutritional Sciences, Faculty of Medicine; St. Michael's Hospital, Toronto 3D Knowledge Synthesis and Clinical Trials Unit, Clinical Nutrition and Risk Factor Modification Centre</p> <p>Ha, Vanessa; University of Toronto, Department of Nutritional Sciences, Faculty of Medicine; University of Toronto, Department of Nutritional Sciences, Faculty of Medicine</p> <p>Cozma, Adrian; University of Toronto, Department of Nutritional Sciences, Faculty of Medicine; St. Michael's Hospital, Toronto 3D Knowledge Synthesis and Clinical Trials Unit, Clinical Nutrition and Risk Factor Modification Centre</p> <p>Mirrahimi, Arash; University of Toronto, Department of Nutritional Sciences, Faculty of Medicine; St. Michael's Hospital, Toronto 3D Knowledge Synthesis and Clinical Trials Unit, Clinical Nutrition and Risk Factor Modification Centre</p> <p>Maroleanu, Adriana; St. Michael's Hospital, Toronto 3D Knowledge Synthesis and Clinical Trials Unit, Clinical Nutrition and Risk Factor Modification Centre</p> <p>Chiavaroli, Laura; University of Toronto, Department of Nutritional Sciences, Faculty of Medicine; St. Michael's Hospital, Toronto 3D Knowledge Synthesis and Clinical Trials Unit, Clinical Nutrition and Risk Factor Modification Centre</p> <p>Leiter, Lawrence; St. Michael's Hospital, Division of Endocrinology and Metabolism; University of Toronto, Department of Medicine, Faculty of Medicine</p> <p>de Souza, Russell; McMaster University, Clinical Epidemiology &amp; Biostatistics; University of Toronto, Department of Nutritional Sciences, Faculty of Medicine</p> <p>Jenkins, David; University of Toronto, Department of Medicine, Faculty of</p> |

|                                      |                                                                                                                                                                                                                                                                                                                        |
|--------------------------------------|------------------------------------------------------------------------------------------------------------------------------------------------------------------------------------------------------------------------------------------------------------------------------------------------------------------------|
|                                      | Medicine; St. Michael's Hospital, Division of Endocrinology and Metabolism<br>Sievenpiper, John; McMaster University, Department of Pathology and<br>Molecular Medicine; St. Michael's Hospital, Toronto 3D Knowledge<br>Synthesis and Clinical Trials Unit, Clinical Nutrition and Risk Factor<br>Modification Centre |
| <b>Primary Subject<br/>Heading</b> : | Nutrition and metabolism                                                                                                                                                                                                                                                                                               |
| <b>Secondary Subject Heading</b> :   | Nutrition and metabolism, Diabetes and endocrinology                                                                                                                                                                                                                                                                   |
| <b>Keywords</b> :                    | Lipid disorders < DIABETES & ENDOCRINOLOGY, Diabetes & endocrinology<br>< INTERNAL MEDICINE, NUTRITION & DIETETICS                                                                                                                                                                                                     |
|                                      |                                                                                                                                                                                                                                                                                                                        |

SCHOLARONE™  
Manuscripts



1  
2  
3 1 **EFFECT OF TREE NUTS ON METABOLIC SYNDROME CRITERIA: A**  
4 2 **SYSTEMATIC REVIEW AND META-ANALYSIS OF RANDOMIZED CONTROLLED**  
5 3 **TRIALS**  
6  
7  
8 4

9 5 **Running Title:** Tree Nuts and Metabolic Syndrome  
10 6

11  
12 7 **Sonia Blanco Mejia MD,<sup>1,2</sup> Cyril WC Kendall PhD,<sup>1,2,3</sup> Effie Viguiliouk HBSc,<sup>1,2</sup> Livia S**  
13 8 **Augustin PhD,<sup>1,2</sup> Vanessa Ha MSc,<sup>1,2</sup> Adrian I Cozma HBSc,<sup>1,2</sup> Arash Mirrahimi MSc,<sup>1,2,4</sup>**  
14 9 **Adriana Maroleanu BPH,<sup>2</sup> Laura Chiavaroli MSc,<sup>1,2</sup> Lawrence A Leiter MD,<sup>1,2,5,6,7</sup> Russell**  
15 10 **J de Souza ScD RD,<sup>1,2,8</sup> David JA Jenkins MD PhD DSc,<sup>1,2,5,6,7</sup> John L Sievenpiper MD**  
16 11 **PhD.<sup>2,5,6,9</sup>**  
17  
18  
19  
20  
21  
22

23 13 <sup>1</sup>Department of Nutritional Sciences, Faculty of Medicine, University of Toronto, Toronto,  
24 14 Canada; <sup>2</sup>Toronto 3D Knowledge Synthesis and Clinical Trials Unit, Clinical Nutrition and  
25 15 Risk Factor Modification Centre, St. Michael's Hospital, Toronto, Canada; <sup>3</sup>College of  
26 16 Pharmacy and Nutrition, University of Saskatchewan, Saskatoon, Saskatchewan, Canada;  
27 17 <sup>4</sup>School of Medicine, Faculty of Health Sciences, Queen's University, Kingston, Ontario,  
28 18 Canada; <sup>5</sup>Li Ka Shing Knowledge Institute, St. Michael's Hospital, Toronto, Canada,  
29 19 <sup>6</sup>Division of Endocrinology and Metabolism, St. Michael's Hospital, Toronto, Canada;  
30 20 <sup>7</sup>Department of Medicine, Faculty of Medicine, University of Toronto, Toronto, Canada;  
31 21 <sup>8</sup>Department of Clinical Epidemiology & Biostatistics, Faculty of Health Sciences, McMaster  
32 22 University, Hamilton, Canada; <sup>9</sup>Department of Pathology and Molecular Medicine, Faculty of  
33 23 Health Sciences, McMaster University, Hamilton, Canada.  
34  
35  
36  
37  
38  
39  
40  
41  
42  
43  
44  
45  
46  
47  
48  
49  
50  
51  
52  
53  
54  
55  
56  
57  
58  
59  
60

26 **Corresponding author:**

27 [Dr. Cyril Kendall](#)

28 Department of Nutritional Sciences Faculty of Medicine, University of Toronto, Toronto, ON,  
29 Canada. [cyril.kendall@utoronto.ca](mailto:cyril.kendall@utoronto.ca)

30 **Text word count:** 4,658

31 **Abstract Word Count:** 297

32 **Tables:** 1

33 **Figures:** 3

34 **References:** 83

35 **Appendices:** 3 Tables & 10 Figures  
36

**ABSTRACT**

**Objective:** To provide a broader evidence summary to inform dietary guidelines of the effect of tree nuts on criteria of the metabolic syndrome (MetS).

**Design:** We conducted a systematic review and meta-analysis of the effect of tree nuts on criteria of the MetS.

**Data sources:** We searched MEDLINE, EMBASE, CINAHL, and the Cochrane Library (through April 4, 2014).

**Eligibility criteria for selecting studies:** We included relevant randomized controlled trials (RCTs) of  $\geq 3$  weeks reporting at least one criterion of the MetS.

**Data extraction:** Two or more independent reviewers extracted all relevant data. Data were pooled using the generic inverse variance method using random effects models and expressed as mean differences (MD) with 95% confidence intervals (CI). Heterogeneity was assessed by the Cochran Q statistic and quantified by the  $I^2$  statistic. Study quality and risk of bias were assessed.

**Results:** Eligibility criteria were met by 49 RCTs including 2,226 participants who were otherwise healthy or had dyslipidemia, MetS or diabetes mellitus. Tree nut interventions lowered triglycerides (MD = -0.06 mmol/L [95% CI, -0.09, -0.03 mmol/L]), and fasting blood glucose (MD = -0.08 mmol/L [95% CI, -0.16, -0.01 mmol/L]) compared with control diet interventions. There was no effect on waist circumference, HDL-C, or blood pressure with the direction of effect favouring tree nuts for waist circumference. There was evidence of significant unexplained heterogeneity in all analyses ( $P < 0.05$ ).

**Conclusion:** Pooled analyses show a MetS benefit of tree nuts through modest decreases in triglycerides and fasting blood glucose with no adverse effects on other criteria across nut types. As our conclusions are limited by the short duration and poor quality of the majority of trials, as well as significant unexplained between-study heterogeneity, there remains a need for larger, longer, high quality trials.

**Protocol Registration:** ClinicalTrials.gov identifier, NCT01630980

1  
2  
3 65 **Strengths and limitations of this study**  
4

- 5 66 • This is the first systematic review and meta-analysis to look at the effect of tree nuts  
6 on metabolic syndrome criteria.  
7  
8  
9 68 • This systematic review and meta-analysis involved a large number of trials (47  
10 RCTs) in participants with a range of metabolic conditions.  
11  
12  
13 70 • Most of the trials (74.4%) were of low quality (MQS < 8).  
14  
15 71 • Most of the trials (68.8%) were of short duration (< 12 weeks).  
16  
17  
18 72 • Substantial inter-study heterogeneity remained unexplained.  
19  
20  
21  
22 74

## INTRODUCTION

Dietary patterns including tree nuts have received particular attention for their cardiovascular benefits, and the Food and Drug Administration (FDA) have granted a qualified health claim to tree nuts for cardiovascular risk reduction.<sup>1</sup> General dietary guidelines<sup>2</sup> and heart health guidelines<sup>3 4</sup> also continue to recommend tree nuts alone or as part of the Mediterranean, Portfolio, and Dietary Approaches to Stop Hypertension (DASH) dietary patterns for cardiovascular disease prevention and management.

Although these recommendations are based primarily on the LDL-C lowering benefits of tree nuts<sup>4</sup>, the cardiovascular risk reduction seen with tree nuts is beyond that which would be predicted by this effect alone. The Prevención con Dieta Mediterránea (PREDIMED) trial showed that despite a non-significant effect on LDL-C early on in the trial<sup>5</sup> a Mediterranean diet supplemented with mixed nuts (30 g/day) compared with a low-fat control diet reduced major cardiovascular events by 30% in high cardiovascular risk participants.<sup>6</sup> Nut consumption of > 3 servings/week was also associated with other metabolic advantages such as a decreased risk of obesity, MetS, and diabetes.<sup>7</sup> Individual large trials of tree nuts have also shown that nuts improve criteria of the metabolic syndrome: waist circumference,<sup>8 9</sup> triglycerides,<sup>5 10-12</sup> HDL-C,<sup>13-18</sup> blood pressure<sup>5 8</sup> and glycemic control.<sup>19-22</sup>

The overall evidence for these additional metabolic benefits, however, remains uncertain. Guidelines have not recommended tree nuts directly for managing these risk factors. Although the Canadian Diabetes Association 2013 clinical practice guidelines for nutrition therapy<sup>23</sup> did acknowledge some of these metabolic benefits, the evidence was deemed insufficient for making a recommendation. Tree nut consumption was recommended only in so far as part of Mediterranean or DASH dietary patterns.<sup>23</sup> To synthesize the evidence on which recommendations are based for the metabolic benefits of tree nuts beyond LDL-C lowering, we conducted a systematic review and meta-analysis of randomized controlled dietary trials of the effect of tree nuts on criteria of the metabolic syndrome.

1  
2  
3 1034  
5 104

## METHODS

### 105 Protocol and Registration

106 We followed the guidelines of the Cochrane Handbook for Systematic Reviews of  
107 Intervention for the planning and conduct of this meta-analysis.<sup>24</sup> Reporting of results  
108 followed the Preferred Reporting Items for Systematic Reviews and Meta-Analyses  
109 (PRISMA) guidelines.<sup>25</sup> The review protocol is available at ClinicalTrials.gov (registration  
110 number: NCT01630980).

111

### 112 Study Selection

113 We searched MEDLINE, EMBASE, CINAHL, and the Cochrane Library (through April  
114 4, 2014) to identify randomized controlled dietary trials of tree nuts. Details of the search  
115 strategy are presented in **Appendix Table 1**. The electronic database searches were  
116 supplemented by manual searches of the reference list of included trials and reviews. No  
117 language restriction was used.

118 We included randomized dietary trials that reported the effect of diets rich in tree nuts  
119 (almonds, Brazil nuts, cashews, hazelnuts, macadamia nuts, pecans, pine nuts, pistachios,  
120 walnuts and mixed nuts)<sup>1</sup> as a whole compared to diets without tree nuts, but matched for  
121 energy, on at least one of the five criteria of the MetS: waist circumference, triglycerides,  
122 high-density lipoprotein cholesterol (HDL-C), blood pressure and fasting blood glucose.  
123 Included trials were  $\geq 3$  weeks duration, a duration that satisfies the minimum follow-up  
124 requirement for lipid-lowering health claims by the FDA used in the scientific evaluation of  
125 lipid-lowering health claims.<sup>26</sup> We excluded trials that incorporated tree nuts as paste, oil or  
126 skin nuts into the treatment diets and also those trials that added tree nuts as part of a  
127 dietary pattern and did not have a matched control group. The former exclusion was  
128 intended to eliminate contamination from the other nutritional aspects, and to isolate the  
129 effect of tree nuts. Where multiple intervention or control groups were presented, we only  
130 included those groups which allowed us to isolate the effect of tree nuts. When multiple

1  
2  
3 131 publications existed for the same trial, data from the most recent report were included.  
4  
5 132 Publications including additional relevant data were used as companion reports. The MetS  
6  
7 133 endpoints were selected according to the 2009 harmonized definition for MetS.<sup>27</sup>  
8  
9 134

#### 11 135 **Data Extraction**

12  
13 136 Studies that met the inclusion criteria were extracted in full by two independent  
14  
15 137 reviewers (SBM and one of EV, LSA, VH or AM) for study characteristics and data for  
16  
17 138 endpoints. Study characteristics included: study design (crossover or parallel), participant  
18  
19 139 characteristics, comparator, nut dose, nut type, duration of follow-up, dietary adherence  
20  
21 140 measures, macronutrient profile, statistical analysis and funding sources. All disagreements  
22  
23 141 amongst reviewers were resolved by consensus.  
24

25 142 The Heyland Methodological Quality Score (MQS) was used for assessment of study  
26  
27 143 quality.<sup>28</sup> Scores from 0-2 points were given for each of the following evaluated criteria:  
28  
29 144 methods (randomization, blinding and analysis), sample (selection, compatibility and follow-  
30  
31 145 up), and intervention (protocol, co-intervention and crossovers). This scale gave a maximum  
32  
33 146 MQS of 13 points. Studies with a score of  $\geq 8$  were considered of high quality.  
34

35 147 The Cochrane Collaboration Risk of Bias Tool was used to assess the study risk of  
36  
37 148 bias.<sup>24</sup> Trials were classified as “unclear risk of bias” when insufficient information was  
38  
39 149 provided to permit judgment, “high risk of bias” when the methodological flaw was likely to  
40  
41 150 have affected the true outcome and “low risk of bias” when a methodological flaw was  
42  
43 151 deemed inconsequential to determine the true effect within a study. As blinding of  
44  
45 152 participants in dietary trials is difficult to achieve, we scored the trials based on the intensity  
46  
47 153 of the dietary advice given to the randomized groups. If treatment intensity was judged to be  
48  
49 154 more intensive in one intervention over another, then trials were classified as “high risk”. If  
50  
51 155 both interventions were emphasized equally, then trials were classified as “low risk of bias”.  
52  
53 156 Trials reported in abstract format only were not included in assessments of MQS or of bias  
54  
55 157 owing to a lack of information.  
56  
57  
58  
59  
60

1  
2  
3 158 Means (SD) for baseline values, end values, change-from baseline differences, end-  
4  
5 159 differences, and mean differences were recorded for primary endpoints (waist  
6  
7 160 circumference, triglycerides, HDL-C, blood pressure and fasting blood glucose). Reported *t*-  
8  
9 161 values or *F*-statistics, and *P*-values for differences were also recorded. Missing information  
10  
11 162 for any endpoint data or study details were requested directly from authors. Where SDs were  
12  
13 163 not reported or given directly by authors, we attempted to calculate these missing SDs from  
14  
15 164 the available statistics using methods recommended by the Cochrane Collaboration.<sup>24</sup> If this  
16  
17 165 was not possible, then we imputed these missing SDs using a pooled correlation coefficient  
18  
19 166 derived from a meta-analysis of correlation coefficients from those trials reporting sufficient  
20  
21 167 data.<sup>24</sup> These correlation coefficients were then transformed into z-scores and meta-  
22  
23 168 analyzed using inverse-variance weighing. The pooled effect estimate from the z-scores was  
24  
25 169 then back transformed to impute the missing SDs. We used a derived pooled correlation  
26  
27 170 coefficient of 0.635 for triglycerides, 0.856 for HDL-C, 0.327 for systolic blood pressure,  
28  
29 171 0.508 for diastolic blood pressure and 0.446 for fasting blood glucose.  
30  
31  
32

### 33 173 **Statistical Analyses**

34  
35 174 Data were analyzed using Review Manager (RevMan) 5.2 (The Nordic Cochrane  
36  
37 175 Centre, The Cochrane Collaboration, Copenhagen, Denmark) for primary analyses and  
38  
39 176 Stata (version 12, College Station, USA) for subgroup analyses. Pooled analyses were  
40  
41 177 conducted using the Generic Inverse Variance method with random effects models. Data  
42  
43 178 were expressed as mean differences (MD) with 95% CI and considered significant at *P* <  
44  
45 179 0.05. Paired analyses were applied to all crossover trials.<sup>29</sup> In cases where there were  
46  
47 180 multiple intervention or control groups, we combined either intervention or control groups to  
48  
49 181 create single pairwise comparisons with the aim of diminishing the unit-of-analysis error.<sup>24</sup>  
50  
51

52 182 The presence of between-studies-heterogeneity was assessed by the Cochran Q  
53  
54 183 statistic (significance set at *P* < 0.10) and quantified by the *I*<sup>2</sup> statistic. An *I*<sup>2</sup> ≤ 50% indicated  
55  
56 184 “moderate” heterogeneity, ≥ 50% indicated “substantial” heterogeneity and ≥ 75% indicated  
57  
58 185 “considerable” heterogeneity.<sup>24</sup> Analyses were stratified by participant health status:  
59  
60



1  
2  
3 186 otherwise healthy, dyslipidemia, MetS criteria and type 2 diabetes based on trial entry  
4  
5 187 criteria. Sources of heterogeneity were explored using sensitivity and subgroup analyses.  
6  
7 188 To determine if any single trial exerted an undue influence on the overall results, sensitivity  
8  
9 189 analyses were preformed, in which each individual trial was removed from the meta-  
10  
11 190 analysis, and the effect size re-calculated with the remaining trials. Sensitivity analyses  
12  
13 191 were also undertaken using correlation coefficients of 0.25, 0.50 and 0.75 to determine  
14  
15 192 whether the overall results were robust to the use of different derived correlation coefficients  
16  
17 193 in paired analyses of crossover trials. A priori subgroup analyses were done for baseline  
18  
19 194 values (according to MetS diagnostic criteria),<sup>27</sup> absolute fibre intake (treatment diet < 25  
20  
21 195 g/day vs.  $\geq 25$  g/day<sup>23</sup> and change in [within and between the diets]), absolute saturated fatty  
22  
23 196 acid (SFA) intake (treatment diet < 7% vs.  $\geq 7%$  of total energy<sup>23</sup> and change in [within and  
24  
25 197 between the diets]), tree nut dose (< 50 g/day vs.  $\geq 50$  g/day), tree nut type (almonds, Brazil  
26  
27 198 nuts, cashews, hazelnuts, macadamia nuts, pecans, pine nuts, pistachios, walnuts and  
28  
29 199 mixed nuts), duration of follow-up (< 3 months vs.  $\geq 3$  months), study design (crossover vs.  
30  
31 200 parallel), and study quality (MQS < 8 vs.  $\geq 8$ ). *Post-hoc* subgroup analyses were conducted  
32  
33 201 for the difference in percent carbohydrate intake between the control and intervention arm  
34  
35 202 (carbohydrate displacement). The significance of between-subgroup differences were  
36  
37 203 assessed using meta-regression ( $P < 0.05$ ). Publication bias was assessed by visual  
38  
39 204 inspection of funnel plots and formally complemented by Begg's and Egger's tests.  
40  
41  
42  
43

## 206 RESULTS

### 207 Trial Selection

47  
48 **Figure 1** shows flow of studies through the search and selection process. We  
49  
50 209 identified a total of 2,531 reports, from which 752 reports were duplicates and 1,631 reports  
51  
52 210 were deemed irrelevant (determined by review of title and abstract). The remaining 146  
53  
54 211 reports were reviewed in full, of which 97 reports were excluded for not meeting inclusion  
55  
56 212 criteria. A total of 49 reports on 47 trials<sup>8-23 30-59</sup> as well as four companion reports<sup>60-63</sup> that  
57  
58 213 addressed at least one criterion of the metabolic syndrome (waist circumference [15 trials,  $n$

214 = 1050], triglycerides [44 trials,  $n = 1,690$ ], HDL-C [45 trials,  $n = 2,142$ ], blood pressure [20  
215 trials,  $n = 1,267$ ], and fasting blood glucose [26 trials,  $n = 1,360$ ] were included).

216

## 217 Trial Characteristics

218 **Table 1** presents characteristics of the included trials. There were 47 trials involving  
219 49 comparisons in 2,211 participants. Twelve trials (26.7%)<sup>10 12 14 16 30 32 34 39 43 49 59</sup> were  
220 conducted in otherwise healthy participants. Two of these trials contained a minority of  
221 participants with dyslipidemia who had been classified as otherwise healthy.<sup>36 43</sup> Eleven trials  
222 (24.4%)<sup>8 18-21 35 37 44 45 54 55</sup> were conducted in participants with type 2 diabetes or a mix of  
223 patients with overweight and type 2 diabetes in one case<sup>8</sup>. The remaining trials were  
224 conducted in people with dyslipidemia (9 trials [20%]<sup>13 15 17 31 33 38 41 42 53</sup>), MetS [5 trials<sup>22 40 47</sup>  
225 <sup>48 58</sup>], some MetS criteria (13 trials [28.9%]: overweight 7 trials<sup>9 11 50-52 56 57</sup>, or prediabetes [1  
226 trial<sup>46</sup>]). Median age for participants was 50.2 years (IQR: 42.5 to 55.8 years). Median body  
227 weight for participants was 81.4 kg (IQR: 72.1 to 91.7 kg).

228 Trials tended to be of considerable size, with a median number of 40 participants  
229 (IQR: 25 to 61 participants). The majority were conducted in the United States of America (24  
230 trials [53.3%]) with the rest conducted in various other countries: 3 trials (6.7%) each in  
231 Australia, New Zealand, and Iran; 2 trials (4.4%) each in Canada, and Spain; and 1 trial  
232 (2.2%) each in Japan, Turkey, Italy, China, Taiwan, Germany, India and South Africa. A  
233 similar number of trials used parallel (24 trials [53.3%]) and crossover (21 trials [46.7%])  
234 designs. All trials were conducted in an outpatient setting.

235 Control diets included usual diets (9 trials, 20%), a National Cholesterol Education  
236 Program step 1 diet (5 trials, 11.1%), an average American Diet (3 trials, 6.7%), a low fat diet  
237 (3 trials, 6.7%), among others. Twenty-seven trials (60%) provided test food supplements,  
238 12 trials (26.7%) provided all study foods under metabolic feeding control conditions, and 4  
239 trials provided dietary advice (8.9%). Five trials (11.1%) used a control diet in which a muffin  
240 or pretzel<sup>11 15 20 53</sup> or cheese sticks<sup>19</sup> were exchanged for nuts. The test and control diets  
241 were matched for energy in all cases; however 2 of the trials<sup>11 50</sup> featured a negative energy

1  
2  
3 242 balance tree nut diet compared with a matched negative energy balance control diet. Tree  
4  
5 243 nut types included almonds (13 trials, 28.3%), cashews (2 trials, 4.3%), hazelnuts (3 trials,  
6  
7 244 6.5%), macadamia nuts (3 trials, 6.5%), pecans (2 trials, 4.3%), pistachios (8 trials, 17.4%),  
8  
9 245 walnuts (13 trials, 28.3%), and mixed nuts (2 trials, 4.3%). We were unable to find studies on  
10  
11 246 Brazil nuts or pine nuts. Median nut dose intake was 49.3 g/day (IQR: 42 to 70.5 g/day).  
12  
13 247 Median follow-up was 8 weeks (IQR: 4 to 12 weeks).

14  
15 248       Macronutrient profiles varied across studies and between treatment and control  
16  
17 249 groups, median values reported for carbohydrate intake were 48% (IQR: of 44 to 51%) for  
18  
19 250 the treatment group and 50.5% (IQR: 46 to 57%) for the control group. Median values for fat  
20  
21 251 intake were 35% (IQR: 31 to 39%) and 30% (IQR: 27.3 to 34%) for tree nut and control  
22  
23 252 group respectively. Median values for protein intake were 16% (IQR: 15 to 17%) and 17%  
24  
25 253 (IQR: 15 to 18.8%) for tree nut and control group correspondingly.

26  
27 254       **Appendix Table 2 and Appendix Figure 1** present the assessment and summary of  
28  
29 255 the risk of bias by using The Heyland MQS and The Cochrane Risk of Bias Tool. The  
30  
31 256 Heyland MQS ranged from 3 to 9. Thirty-two trials (74.4%) were considered to be low quality  
32  
33 257 (MQS < 8) and 11 trials (25.6%) high quality (MQS ≥ 8). The main contributors of low scores  
34  
35 258 were absence of double-blinding, loss of participants to follow up, and poor description of  
36  
37 259 crossovers in the control group. The Cochrane Risk of Bias Tool showed that 34 trials  
38  
39 260 (70.8%) were unclear risk and 14 trials (29.2%) were low risk for random sequence  
40  
41 261 generation; 29 trials (60.4%) were unclear risk and 19 trials (39.6%) were low risk for  
42  
43 262 allocation concealment; 26 trials (54.2%) were unclear risk and 22 trials (45.8%) were low  
44  
45 263 risk for blinding of participants and personnel; 5 trials (10.4%) were unclear risk, 35 trials  
46  
47 264 (72.9%) were low risk, and 8 trials (16.7%) were high risk for incomplete outcome data; and  
48  
49 265 28 trials (58.3%) were unclear risk, 19 trials (39.6%) were low risk, and 1 trial (2.1%) was  
50  
51 266 high risk for selective reporting.

52  
53  
54 267       Most of the trials reported research funding from an agency 28/45 (62.2%), while  
55  
56 268 others were funded from a combination of agency and industry 5/45 (11.1%) or industry

269 alone 6/45 (13.3%). One trial (2.2%) reported no funding. Five trials<sup>18 38 45 52 53</sup> did not report  
270 their funding source (11.1%).

271

## 272 **Waist Circumference**

273 **Appendix Figure 2** presents data on the effect of tree nuts on waist circumference.

274 Tree nuts did not significantly decrease waist circumference (MD = -0.62 cm [95% CI, -1.54,

275 0.30 cm]) in the overall analyses with evidence of substantial heterogeneity ( $I^2 = 67%$ ,  $P <$

276 0.001). Stratification by health status failed to demonstrate a significant effect for any of the

277 sub samples. Sensitivity analyses did not alter the results (data not shown).

278 **Appendix Table 3-A and Appendix Figure 3** present the *a priori* continuous and

279 categorical subgroup analyses, respectively, for waist circumference. There was evidence

280 of statistically significant effect modification by the difference in carbohydrate intake in the

281 continuous subgroup analyses ( $P < 0.05$ ) between tree nut and control interventions. Trials

282 with lower carbohydrate intakes in the tree nut intervention arms showed larger reductions in

283 waist circumference. No other subgroup analyses were statistically significant.

284

## 285 **Triglycerides**

286 **Figure 2** presents data on the effect of tree nuts on triglycerides. Tree nuts showed a

287 significant triglyceride-lowering effect (MD = -0.06 mmol/L, [95% CI, -0.09, -0.03 mmol/L]) in

288 the overall analysis with evidence of moderate heterogeneity ( $I^2 = 34%$ ,  $P = 0.02$ ). The same

289 effect was seen with evidence of moderate heterogeneity ( $I^2 = 42%$ ,  $P = 0.05$ ) in the

290 subsample of participants who were otherwise healthy (MD = -0.07 mmol/L [95% CI, -0.11, -

291 0.04 mmol/L]). Although the reductions were not statistically significant in people with

292 dyslipidemia MetS criteria or diabetes, they did not significantly differ from the reductions in

293 participants who were otherwise healthy. Sensitivity analyses did not alter the results (data

294 not shown).

295 **Appendix Table 3-B and Appendix Figure 4** present data from the *a priori*

296 continuous and categorical subgroup analyses, respectively, for triglycerides. There was

1  
2  
3 297 significant effect modification by nut type in categorical analyses ( $P < 0.05$ ). Pairwise  
4  
5 298 comparisons showed that pecan, walnut, and pistachio interventions all significantly  
6  
7 299 decreased triglycerides more than almond interventions ( $P < 0.05$ ) and almond, macadamia,  
8  
9 300 pecan, pistachio and walnut more than hazelnut ( $P < 0.05$ ). No other subgroup analyses  
10  
11 301 were statistically significant.  
12

### 13 302

### 14 303 HDL-C

15  
16  
17 304 **Appendix Figure 5** presents the effect of tree nuts on HDL-C. Tree nuts did not  
18  
19 305 significantly affect HDL-C (MD = 0.00 mmol/L [95% CI, -0.01, 0.01 mmol/L]) in the overall  
20  
21 306 analysis with evidence of considerable heterogeneity ( $I^2 = 86%$ ,  $P < 0.001$ ). Stratification by  
22  
23 307 health status failed to demonstrate a significant effect for any of the subsamples. Sensitivity  
24  
25 308 analyses did not alter the results (data not shown).  
26

27 309 **Appendix Table 3-C and Appendix Figure 6** present the *a priori* continuous and  
28  
29 310 categorical subgroup analyses, respectively, for HDL-C. None of the subgroup analyses  
30  
31 311 were significant.  
32

### 33 312

### 34 313 Blood Pressure

35  
36  
37 314 **Appendix Figures 7-A and 7-B** present the effect of tree nuts on systolic and  
38  
39 315 diastolic blood pressure, respectively. Tree nuts did not significantly increase either systolic  
40  
41 316 (MD = 0.07 mmHg [95% CI, -1.54, 1.69 mmHg]) or diastolic blood pressure (MD = 0.23  
42  
43 317 mmHg [95% CI, -0.38, 0.83 mmHg]) in the overall analysis with evidence of substantial  
44  
45 318 heterogeneity in the systolic blood pressure analysis ( $I^2 = 64%$ ,  $P < 0.001$ ) and evidence of  
46  
47 319 moderate heterogeneity in the diastolic blood pressure analysis ( $I^2 = 34%$ ,  $P = 0.07$ ).  
48  
49 320 Stratification by health status failed to demonstrate an effect for any of the subsamples.  
50  
51 321 Sensitivity analyses did not alter the results (data not shown).  
52

53  
54 322 **Appendix Tables 3-D and 3-E** present the *a priori* continuous subgroup analyses  
55  
56 323 and **Appendix Figures 8-A and 8-B** present the *a priori* categorical subgroup analyses for  
57  
58 324 systolic and diastolic blood pressure, respectively. There was evidence of statistically  
59  
60

1  
2  
3 325 significant effect modification by difference in fibre intake and by the difference in  
4  
5 326 carbohydrate intake in the continuous subgroup analyses, both for systolic blood pressure ( $P$   
6  
7 327  $< 0.05$  and  $P < 0.01$  respectively) between tree nut and control interventions. Trials with  
8  
9 328 higher fibre intakes in the tree nut intervention arms showed larger reductions in systolic  
10  
11 329 blood pressure. Trials in which tree nuts displaced more carbohydrates or contained lower  
12  
13 330 levels of SFA intake leading to larger differences between the tree nut and control  
14  
15 331 interventions were more likely to favour the Tree nut diet in systolic blood pressure. Tree nut  
16  
17 332 intervention arms with higher fibre intake showed reductions in diastolic blood pressure and  
18  
19 333 also explained the heterogeneity in the overall analyses reducing the residual- $I^2$  to 1.6%. No  
20  
21 334 other subgroup analyses were statistically significant for either systolic or diastolic blood  
22  
23 335 pressure.  
24  
25  
26 336

### 27 337 **Fasting Blood Glucose**

28  
29 338 **Figure 3** presents the effect of tree nuts on fasting blood glucose. Tree nuts showed  
30  
31 339 a significant fasting blood glucose-lowering effect (MD = -0.08 mmol/L [95% CI, -0.16, -0.01  
32  
33 340 mmol/L]) in the overall analysis, with evidence of moderate heterogeneity ( $I^2 = 41\%$ ,  $P <$   
34  
35 341 0.05). Stratification by health status failed to demonstrate an effect for any of the  
36  
37 342 subsamples. Sensitivity analyses did not alter the results (data not shown).

38  
39 343 **Appendix Table 3-F and Appendix Figure 9** present *a priori* continuous and  
40  
41 344 categorical subgroup analyses, respectively, for fasting blood glucose. None of the subgroup  
42  
43 345 analyses were significant.  
44  
45  
46 346

### 47 347 **Publication Bias**

48  
49 348 **Appendix Figure 10** presents the funnel plots for publication bias for each endpoint.  
50  
51 349 Visual inspection of the funnel plots revealed some evidence of asymmetry in several of the  
52  
53 350 endpoints. There was a small trial with larger effect estimate favoring tree nuts than control  
54  
55 351 for waist circumference, which argues that the “small-study” effect was actually not a source  
56  
57 352 of potential bias (i.e. smaller studies that favoured control were published). On the other  
58  
59  
60

1  
2  
3 353 hand, there were more small trials with larger effect estimates favouring control than tree  
4  
5 354 nuts for triglycerides. Egger's test confirmed these small study effects for triglycerides ( $P <$   
6  
7 355 0.05). No other evidence of small study effects was detected by Egger's test and Begg's  
8  
9 356 tests.

357

358

## DISCUSSION

359 To our knowledge, this is the first systematic review and meta-analysis to look at the  
360 effect of tree nuts on MetS criteria. Our systematic review and meta-analysis included 47  
361 randomized trials in 2,211 participants who were otherwise healthy or had MetS criteria,  
362 dyslipidemia, or type 2 diabetes. Tree nut consumption at a median dose of ~50 g/day was  
363 found to decrease triglycerides significantly by ~0.06 mmol/L, and to decrease fasting blood  
364 glucose significantly by ~0.08 mmol/L over a median follow-up of 8-weeks. No adverse  
365 effects were seen on waist circumference, HDL-C, or blood, suggesting an overall net  
366 metabolic benefit of tree nuts.

367

### Results in relation to other studies

369 Our findings of a reduction in triglycerides without the expected reciprocal increase in  
370 HDL-C are in accordance with previous evidence. Although Sabate et al<sup>64</sup> did not show a  
371 triglyceride lowering effect of nut interventions (nonspecific to tree nuts) in overall pooled  
372 analyses in an patient-level meta-analysis of controlled feeding trials, he did show that nut  
373 interventions lowered triglycerides when analyses were restricted to a subsample of  
374 participants with baseline triglycerides  $\geq 1.7$ mmol/L, without an increase in HDL-C. A  
375 triglyceride benefit has also been seen in individual trials and meta-analyses of trials  
376 investigating the effect of a Mediterranean dietary pattern containing tree nuts in people with  
377 diabetes.<sup>65 66</sup> This triglyceride-lowering effect, however, was accompanied by an HDL-C  
378 increasing effect.<sup>65 66</sup> Our findings add to these data by showing a similar triglyceride-  
379 lowering effect, especially for walnuts, pistachios, macadamia and pecans, in the absence of  
380 an HDL-C increasing effect, across all subsamples of participants, without differences in



1  
2  
3 381 triglycerides by baseline levels. The lipid benefits of tree nuts can be attributed to numerous  
4  
5 382 cardioprotective nutrients such as unsaturated fatty acids, plant protein, fibre and  
6  
7 383 phytochemicals.<sup>67</sup> The fibre content and high unsaturated fat content with its ability to  
8  
9 384 displace high glycemic index carbohydrate from the diet and so effect a lower glycemic load  
10  
11 385 diet are likely the main factors in lowering triglycerides.<sup>20</sup>

12  
13 386 Our results of a reduction in fasting blood glucose are in accordance with an  
14  
15 387 evidence-based review for the 2013 CDA guidelines that found evidence to support small  
16  
17 388 improvements in overall glycemic control in people with diabetes.<sup>23</sup> Individual trials have  
18  
19 389 shown evidence of improvements in other aspects of glycemic control.<sup>19-22</sup> A fasting blood  
20  
21 390 glucose-decreasing effect has also been seen in long-term glycemic control as assessed by  
22  
23 391 HbA1c for tree nuts as part of Mediterranean<sup>65 66 68</sup> and DASH<sup>69</sup> dietary patterns in people  
24  
25 392 with diabetes.<sup>70</sup> The ability of tree nuts to decrease fasting blood glucose in our analyses  
26  
27 393 may relate to the proposed displacement mechanism by which tree nuts reduce the glycemic  
28  
29 394 load of the diet, as this mechanism would be expected to improve long-term glycemic control  
30  
31 395 through a reduction in postprandial glycaemia,<sup>71</sup> and possibly decrease insulin resistance,<sup>48</sup>  
32  
33 396 neither of which were assessed in our review.

34  
35 397 The lack of effect we observed on waist circumference reinforces the view that tree  
36  
37 398 nuts do not have an adverse effect on body weight. Dietary guidelines have raised concerns  
38  
39 399 about the potential of tree nuts to contribute to weight gain,<sup>2</sup> owing to their high energy  
40  
41 400 density; however prospective cohort studies and randomized trials have shown the opposite.  
42  
43 401 A pooled analysis of Harvard cohorts showed an increase in one serving per day of nuts was  
44  
45 402 associated with significant weight loss.<sup>72</sup> Controlled trials of tree nuts alone or as part of  
46  
47 403 Mediterranean,<sup>65 66 68</sup> Portfolio,<sup>73</sup> or DASH<sup>69</sup> dietary patterns have shown neutral or weight  
48  
49 404 loss effects, and no influence on body fat mass or body fat percentage.<sup>74</sup> Dietary patterns  
50  
51 405 that incorporated nuts have reported weight loss under isocaloric conditions or no weight  
52  
53 406 gain under hypercaloric feeding conditions,<sup>75</sup> perhaps because of the metabolically-available  
54  
55 407 energy from nuts is less than the calculated value, as incomplete digestion of nuts leading to  
56  
57 408 energy excretion in the feces.<sup>76</sup> Our findings further suggest that tree nuts do not have a

1  
2  
3 409 significant effect on the most metabolically adverse weight gain involving an increase in  
4  
5 410 waist circumference. We observed a tendency for a reduction in waist circumference,  
6  
7 411 especially where nuts displaced high glycemic index carbohydrate to effect a lower-glycemic  
8  
9 412 load diet (as opposed to where tree nuts were used to displace saturated fat). These data  
10  
11 413 suggest that the inclusion of a greater number of long-term trials in which tree nuts are used  
12  
13 414 to displace high-glycemic index carbohydrate to effect a low-glycemic load diet may yet  
14  
15 415 demonstrate a waist circumference benefit in future meta-analyses.

16  
17 416 We were surprised not to see an improvement in blood pressure. Individual trials  
18  
19 417 have shown evidence of improvements in blood pressure<sup>5 8</sup> A blood pressure-decreasing  
20  
21 418 effect of tree nuts has also been seen in the context of Portfolio<sup>73</sup> and DASH<sup>69 77 78</sup> dietary  
22  
23 419 patterns across a range of participant types. As elevated blood pressure in the metabolic  
24  
25 420 syndrome often relates to the underlying insulin resistance, the lack of effect on BP may also  
26  
27 421 be explained by a lack of trials using tree nuts to displace high-glycemic index carbohydrate  
28  
29 422 to decrease the low-glycemic load of the diet (trials taking advantage of this mechanism  
30  
31 423 were more likely to show reductions than trials that did not in subgroup analyses).  
32  
33 424 Alternatively, it may be explained by the need for tree nuts to be combined with the other  
34  
35 425 aspects of a DASH dietary pattern, which collectively result in larger amounts of potassium,  
36  
37 426 calcium, magnesium, dietary fibre, and protein.

38  
39 427

### 40 41 428 **Limitations**

42  
43 429 There are some limitations to our work. First, the majority of trials (74.4%) were of  
44  
45 430 low quality (MQS < 8). Factors that contributed the most to low quality scores were  
46  
47 431 incomplete outcome data and poor reporting. However, in our *a priori* subgroup analyses  
48  
49 432 there was no effect modification by study quality. Second, the risk of bias remains uncertain  
50  
51 433 for most of the available trials owing to poor reporting. This point is particularly concerning  
52  
53 434 given that the majority of the trials were conducted after the Consolidated Standards of  
54  
55 435 Reporting Trials (CONSORT) guidelines were first reported in 1993 and published in 1996.<sup>79</sup>  
56  
57 436 Third, the majority of the available trials were < 3 months, which is perhaps, too short a time  
58  
59  
60

1  
2  
3 437 to observe an effect for some outcomes (waist circumference, blood pressure). This also  
4  
5 438 made it difficult to assess the sustainability of the observed effects over the long term. We  
6  
7 439 did not, however, observe significant effect modification by follow-up in categorical or  
8  
9 440 continuous subgroup analyses for any of the endpoints. Finally, our analyses were  
10  
11 441 complicated by significant unexplained heterogeneity for waist circumference and HDL-C, ,  
12  
13 442 which we attempted to accommodate using of random effects models, remains a source of  
14  
15 443 uncertainty in the summary effect estimates for these endpoints.  
16  
17 444

### 18 19 445 **Practical Implications**

20  
21 446 Tree nuts are a high-energy food that contain cardioprotective nutrients.<sup>67</sup> Even  
22  
23 447 though the median fat intake (33.6%) of the tree nut containing diets was above that of the  
24  
25 448 control (30.5%), but both within the recommended (20-35%) by dietary guidelines,<sup>23</sup> a  
26  
27 449 beneficial effect was seen only in the tree nut containing diets. The median dose of ~50  
28  
29 450 g/day tree nuts can be easily integrated as a snack, into a dietary pattern or as a substitution  
30  
31 451 for animal fats or carbohydrates. No increase in side effects compared with control diets  
32  
33 452 were reported in any of the trials, suggesting diets which emphasize tree nuts are as safe as  
34  
35 453 conventional diets (except in individuals with tree nut allergies).  
36  
37 454

### 38 39 455 **Conclusion**

40  
41 456 In conclusion, our pooled analyses indicate that daily tree nut consumption has an  
42  
43 457 overall metabolic benefit, through modest decreases in triglycerides and fasting blood  
44  
45 458 glucose while preserving waist circumference, HDL-C, and blood pressure in people who are  
46  
47 459 otherwise healthy or have dyslipidemia, MetS criteria, or type 2 diabetes. These data support  
48  
49 460 recommendations to consume tree nuts alone or as part of heart healthy dietary patterns  
50  
51 461 such as the Mediterranean, Portfolio, Vegetarian, and DASH dietary patterns as a means for  
52  
53 462 improving metabolic control.<sup>69 80-83</sup> Careful interpretation of the results is advised, as our  
54  
55 463 conclusions are limited by the short duration and poor quality of the majority of trials, as well  
56  
57 464 as the presence of significant unexplained heterogeneity in our analyses. These limitations  
58  
59  
60

1  
2  
3 465 highlight the need for larger, longer, high quality trials. Trials in which tree nuts are used to  
4  
5 466 displace high-glycemic index carbohydrate to decrease the glycemic load of the diet will be  
6  
7 467 especially relevant to understand the role of tree nuts in reducing cardiometabolic risk  
8  
9 468 associated with the metabolic syndrome.

469

## 470 **Contributions**

471 **Conception and design:** S Blanco Mejia, CWC Kendall, LS Augustin, JL Sievenpiper.

472 **Analysis or interpretation of the data:** S Blanco Mejia, CWC Kendall, E Viguiouk, LS

473 Augustin, V Ha, A Cozma, A Mirrahimi, A Maroleanu, L Chiavaroli, LA Leiter, RJ de Souza,

474 DJA Jenkins, JL Sievenpiper.

475 **Drafting of the article:** S Blanco Mejia, JL Sievenpiper.

476 **Critical revision of the article for important intellectual content:** S Blanco Mejia, CWC

477 Kendall, E Viguiouk, LS Augustin, V Ha, A Cozma, A Mirrahimi, A Maroleanu, L Chiavaroli,

478 LA Leiter, RJ de Souza, DJA Jenkins, JL Sievenpiper.

479 **Final approval of the article:** S Blanco Mejia, CWC Kendall, E Viguiouk, LS Augustin, V

480 Ha, A Cozma, A Mirrahimi, A Maroleanu, L Chiavaroli, LA Leiter, RJ de Souza, DJA

481 Jenkins, JL Sievenpiper.

482 **Statistical expertise:** RJ de Souza.

483 **Obtaining of funding:** CWC Kendall, DJA Jenkins, JL Sievenpiper.

484 **Administrative, technical, or logistic support:** CWC Kendall, E Viguiouk, LS Augustin, V

485 Ha, A Cozma, A Mirrahimi, A Maroleanu, L Chiavaroli.

486 **Collection and assembly of data:** S Blanco Mejia, E Viguiouk, LS Augustin, V Ha, A

487 Cozma, A Maroleanu.

488 **Guarantors:** CWC Kendall and JL Sievenpiper.

489

## 490 **Transparency declaration**

491 The manuscript's guarantors affirms that the manuscript is an honest, accurate, and

492 transparent account of the study being reported; no important aspects of the study have

1  
2  
3 493 been omitted; and any discrepancies from the study as planned (and, if relevant, registered)  
4  
5 494 have been explained.  
6

7 495

### 9 496 **Acknowledgements**

10  
11 497 This work was supported by the International Tree Nut Council Nutrition Research &  
12  
13 498 Education Foundation (Davis, CA), and the Canadian Institutes of Health Research (funding  
14  
15 499 reference number, 129920) through the Canada-Wide Human Nutrition Trialists' Network  
16  
17 500 (NTN). The Diet, Digestive tract, and Disease (3-D) Centre, funded through the Canada  
18  
19 501 Foundation for Innovation (CFI) and the Ministry of Research and Innovation's Ontario  
20  
21 502 Research Fund (ORF), provided the infrastructure for the conduct of this project. **VH** and  
22  
23 503 **AIC** were funded by Province of Ontario Graduate Scholarships. **AIC** was also funded by a  
24  
25 504 Canadian Institutes of Health Research (CIHR)-Fredrick Banting and Charles Best Canada  
26  
27 505 Graduate Scholarship and Banting and Best Diabetes Centre (BBDC)-Novo Nordisk  
28  
29 506 Studentship. **RJdS** was funded by a CIHR Postdoctoral Fellowship Award. **DJAJ** was  
30  
31 507 funded by the Government of Canada through the Canada Research Chair Endowment.  
32  
33 508 None of the sponsors had a role in any aspect of the present study, including design and  
34  
35 509 conduct of the study; collection, management, analysis, and interpretation of the data; and  
36  
37 510 preparation, review, decision to publish or approval of the manuscript.

38  
39 511 We wish to thank Teruko Kishibe for her help in the development of search terms  
40  
41 512 used.  
42

43 513

### 44 514 **Exclusive Licence**

45  
46  
47 515 The Corresponding Author on behalf of all authors grants an exclusive licence on a  
48  
49 516 worldwide basis to the BMJ Publishing Group Ltd and its Licensees to permit this article to  
50  
51 517 be published in BMJ editions and any other BMJ PGL products and sublicences to exploit all  
52  
53 518 subsidiary rights, as set out in the licence ([http://resources.bmj.com/bmj/authors/checklists-](http://resources.bmj.com/bmj/authors/checklists-forms/licence-for-publication)  
54  
55 519 [forms/licence-for-publication](http://resources.bmj.com/bmj/authors/checklists-forms/licence-for-publication)).  
56

57 520  
58  
59  
60

1  
2  
3 521 **Ethical Approval**

4  
5 522 Not required.

6  
7 523

8  
9 524 **Potential Conflicts of Interest**

10  
11 525 All authors have completed the Unified Competing Interest form at  
12  
13 526 [www.icmje.org/coi\\_disclosure.pdf](http://www.icmje.org/coi_disclosure.pdf) (available on request from the corresponding author) and  
14  
15 527 declare: **SBM, LSA, AM, AIC, EV, AM and LAL declare** no conflicts of interest related to  
16  
17 528 this paper. **CWCK** has received research support from the Advanced Foods and Material  
18  
19 529 Network, Agrifoods and Agriculture Canada, the Almond Board of California, the American  
20  
21 530 Pistachio Growers, Barilla, the California Strawberry Commission, the Calorie Control  
22  
23 531 Council, CIHR, the Canola Council of Canada, the Coca-Cola Company (investigator  
24  
25 532 initiated, unrestricted grant), Hain Celestial, the International Tree Nut Council Nutrition  
26  
27 533 Research and Education Foundation, Kellogg, Kraft, Loblaw Companies Ltd., Orafti, Pulse  
28  
29 534 Canada, Saskatchewan Pulse Growers, Solae and Unilever. He has received travel funding,  
30  
31 535 consultant fees and/or honoraria from Abbott Laboratories, the Almond Board of California,  
32  
33 536 the American Peanut Council, the American Pistachio Growers, Barilla, Bayer, the Canola  
34  
35 537 Council of Canada, the Coca-Cola Company, Danone, General Mills, the International Tree  
36  
37 538 Nut Council Nutrition Research and Education Foundation, Kellogg, Loblaw Companies Ltd.,  
38  
39 539 the Nutrition Foundation of Italy, Oldways Preservation Trust, Orafti, Paramount Farms, the  
40  
41 540 Peanut Institute, PepsiCo, Pulse Canada, Sabra Dipping Co., Saskatchewan Pulse Growers,  
42  
43 541 Solae, Sun-Maid, Tate and Lyle, and Unilever. He is on the Dietary Guidelines Committee  
44  
45 542 for the Diabetes Nutrition Study Group of the European Association for the Study of Diabetes  
46  
47 543 and has served on the scientific advisory board for the Almond Board of California, the  
48  
49 544 International Tree Nut Council, Oldways Preservation Trust, Paramount Farms and Pulse  
50  
51 545 Canada. **VH** has received research support from the CIHR and the World Health  
52  
53 546 Organization (WHO) for work on a systematic review and meta-analysis commissioned by  
54  
55 547 WHO of the relation of saturated fatty acids with health outcomes. She received a travel  
56  
57 548 award to attend a science day hosted by PepsiCo Inc. and the New York Academy of  
58  
59  
60

1  
2  
3 549 Sciences. **LC** has received research support from the CIHR and the Agricultural Bioproducts  
4  
5 550 Innovation Program through the Pulse Research Network (PURENet), and Saskatchewan  
6  
7 551 Pulse Growers. She is also a casual clinical research coordinator at Glycemic Index  
8  
9 552 Laboratories. **RJdS** is funded by a CIHR Postdoctoral Fellowship Award and has received  
10  
11 553 research support from the CIHR, the Calorie Control Council, the Canadian Foundation for  
12  
13 554 Dietetic Research and the Coca-Cola Company (investigator initiated, unrestricted grant). He  
14  
15 555 has served as an external resource person to WHO's Nutrition Guidelines Advisory Group  
16  
17 556 and received travel support from WHO to attend group meetings. He is the lead author of 2  
18  
19 557 systematic reviews and meta-analyses commissioned by WHO of the relation of saturated  
20  
21 558 fatty acids and trans fatty acids with health outcomes. **DJAJ** has received research grants  
22  
23 559 from Saskatchewan Pulse Growers, the Agricultural Bioproducts Innovation Program  
24  
25 560 through the Pulse Research Network, the Advanced Foods and Material Network, Loblaw  
26  
27 561 Companies Ltd., Unilever, Barilla, the Almond Board of California, the Coca-Cola Company  
28  
29 562 (investigator initiated, unrestricted grant), Solae, Haine Celestial, the Sanitarium Company,  
30  
31 563 Orafiti, the International Tree Nut Council Nutrition Research and Education Foundation, the  
32  
33 564 Peanut Institute, the Canola and Flax Councils of Canada, the Calorie Control Council, the  
34  
35 565 CIHR, the Canada Foundation for Innovation and the Ontario Research Fund. He has been  
36  
37 566 on the speaker's panel, served on the scientific advisory board, and/or received travel  
38  
39 567 support and/or honoraria from the Almond Board of California, Canadian Agriculture Policy  
40  
41 568 Institute, Loblaw Companies Ltd, the Griffin Hospital (for the development of the NuVal  
42  
43 569 scoring system), the Coca-Cola Company, Saskatchewan Pulse Growers, Sanitarium  
44  
45 570 Company, Orafiti, the Almond Board of California, the American Peanut Council, the  
46  
47 571 International Tree Nut Council Nutrition Research and Education Foundation, the Peanut  
48  
49 572 Institute, Herbalife International, Pacific Health Laboratories, Nutritional Fundamental for  
50  
51 573 Health, Barilla, Metagenics, Bayer Consumer Care, Unilever Canada and Netherlands,  
52  
53 574 Solae, Kellogg, Quaker Oats, Procter & Gamble, the Coca-Cola Company, the Griffin  
54  
55 575 Hospital, Abbott Laboratories, the Canola Council of Canada, Dean Foods, the California  
56  
57 576 Strawberry Commission, Haine Celestial, PepsiCo, the Alpro Foundation, Pioneer Hi- Bred  
58  
59  
60



1  
2  
3 577 International, DuPont Nutrition and Health, Spherix Consulting and WhiteWave Foods, the  
4  
5 578 Advanced Foods and Material Network, the Canola and Flax Councils of Canada, the  
6  
7 579 Nutritional Fundamentals for Health, Agri-Culture and Agri-Food Canada, the Canadian Agri-  
8  
9 580 Food Policy Institute, Pulse Canada, the Saskatchewan Pulse Growers, the Soy Foods  
10  
11 581 Association of North America, the Nutrition Foundation of Italy (NFI), Nutra- Source  
12  
13 582 Diagnostics, the McDougall Program, the Toronto Knowledge Translation Group (St.  
14  
15 583 Michael's Hospital), the Canadian College of Naturopathic Medicine, The Hospital for Sick  
16  
17 584 Children, the Canadian Nutrition Society (CNS), the American Society of Nutrition (ASN),  
18  
19 585 Arizona State University, Paolo Sorbini Foundation and the Institute of Nutrition, Metabolism  
20  
21 586 and Diabetes. He received an honorarium from the US Department of Agriculture to present  
22  
23 587 the 2013 W.O. Atwater Memorial Lecture. He received the 2013 Award for Excellence in  
24  
25 588 Research from the International Nut and Dried Fruit Council. He received funding and travel  
26  
27 589 support from the Canadian Society of Endocrinology and Metabolism to produce mini cases  
28  
29 590 for the Canadian Diabetes Association. His wife is a director and partner of Glycemic Index  
30  
31 591 Laboratories, and his sister received funding through a grant from the St. Michael's Hospital  
32  
33 592 Foundation to develop a cookbook for one of his studies. **JLS** has received research support  
34  
35 593 from the CIHR, Calorie Control Council, the Coca-Cola Company (investigator initiated,  
36  
37 594 unrestricted grant), Pulse Canada, and the International Tree Nut Council Nutrition Research  
38  
39 595 and Education Foundation. He has received travel funding, speaker fees, and/or honoraria  
40  
41 596 from the American Heart Association, the American Society for Nutrition, the National  
42  
43 597 Institute of Diabetes and Digestive and Kidney Diseases, the Canadian Diabetes  
44  
45 598 Association, the Canadian Nutrition Society, the Calorie Control Council, the Diabetes and  
46  
47 599 Nutrition Study Group of the European Association for the Study of Diabetes, the  
48  
49 600 International Life Sciences Institute North America, the International Life Sciences Institute  
50  
51 601 Brazil, the University of South Carolina, the University of Alabama at Birmingham, the  
52  
53 602 Canadian Sugar Institute, Oldways Preservation Trust, the Nutrition Foundation of Italy,  
54  
55 603 Abbott Laboratories, Pulse Canada, Dr. Pepper Snapple Group, Corn Refiners Association,  
56  
57 604 and the Coca-Cola Company. He is on the Clinical Practice Guidelines Expert Committee for  
58  
59  
60

1  
2  
3 605 Nutrition Therapy of both the Canadian Diabetes Association and the European Association  
4  
5 606 for the Study of Diabetes, and he is on the American Society for Nutrition writing panel for a  
6  
7 607 scientific statement on the metabolic and nutritional effects of fructose, sucrose and high-  
8  
9 608 fructose corn syrup. He is a member of the Carbohydrate Quality Consortium and an unpaid  
10  
11 609 scientific advisor for the Food, Nutrition and Safety Program of the International Life Science  
12  
13 610 Institute North America. His wife is an employee of Unilever Canada.  
14

15  
16 611

17  
18 612 **Data Sharing**

19  
20 613 No additional data available.  
21  
22  
23  
24  
25  
26  
27  
28  
29  
30  
31  
32  
33  
34  
35  
36  
37  
38  
39  
40  
41  
42  
43  
44  
45  
46  
47  
48  
49  
50  
51  
52  
53  
54  
55  
56  
57  
58  
59  
60

## REFERENCES

1. US Food and Drug Administration. Qualified Health Claims: Letter of Enforcement Discretion - Nuts and Coronary Heart Disease (Docket No 02P-0505), 2003.
2. U.S. Department of Agriculture and U.S. Department of Health and Human Services. Dietary Guidelines for Americans. 7th Edition ed. Washington, DC: US Government Printing Office, 2010.
3. American Heart Association Nutrition C, Lichtenstein AH, Appel LJ, Brands M, Carnethon M, Daniels S, et al. Diet and lifestyle recommendations revision 2006: a scientific statement from the American Heart Association Nutrition Committee. *Circulation* 2006;114(1):82-96.
4. McKelvie RS, Moe GW, Ezekowitz JA, et al. The 2012 Canadian Cardiovascular Society heart failure management guidelines update: focus on acute and chronic heart failure. *The Canadian journal of cardiology* 2013;29(2):168-81.
5. Estruch R, Martinez-Gonzalez MA, Corella D, et al. Effects of a Mediterranean-style diet on cardiovascular risk factors: a randomized trial. *Annals of internal medicine* 2006;145(1):1-11.
6. Estruch R, Ros E, Salas-Salvado J, Covas MI, et al. Primary prevention of cardiovascular disease with a Mediterranean diet. *The New England journal of medicine* 2013;368(14):1279-90.
7. Ibarrola-Jurado N, Bullo M, Guasch-Ferre M, et al. Cross-sectional assessment of nut consumption and obesity, metabolic syndrome and other cardiometabolic risk factors: the PREDIMED study. *PLoS One* 2013;8(2):e57367.
8. Wien MA, Sabate JM, Ikle DN, et al. Almonds vs complex carbohydrates in a weight reduction program. *Int J Obes Relat Metab Disord* 2003;27(11):1365-72.
9. Somers SM, Graham L, Markwell K. Isoenergetic replacement of dietary saturated with monounsaturated fat via macadamia nuts enhances endothelial function in overweight subjects: e-SPEN Journal, 2013.
10. Curb JD, Wergowske G, Dobbs JC, et al. Serum lipid effects of a high-monounsaturated fat diet based on macadamia nuts. *Arch Intern Med* 2000;160(8):1154-8.
11. Li Z, Song R, Nguyen C, et al. Pistachio nuts reduce triglycerides and body weight by comparison to refined carbohydrate snack in obese subjects on a 12-week weight loss program. *Journal of the American College of Nutrition* 2010;29(3):198-203.
12. Torabian S, Haddad E, Cordero-MacIntyre Z, et al. Long-term walnut supplementation without dietary advice induces favorable serum lipid changes in free-living individuals. *European journal of clinical nutrition* 2010;64(3):274-9.
13. Chisholm A, Mann J, Skeaff M, et al. A diet rich in walnuts favourably influences plasma fatty acid profile in moderately hyperlipidaemic subjects. *European journal of clinical nutrition* 1998;52(1):12-6.
14. Rajaram S, Burke K, Connell B, et al. A monounsaturated fatty acid-rich pecan-enriched diet favorably alters the serum lipid profile of healthy men and women. *The Journal of nutrition* 2001;131(9):2275-9.

15. Jenkins DJ, Kendall CW, Marchie A, et al. Dose response of almonds on coronary heart disease risk factors: blood lipids, oxidized low-density lipoproteins, lipoprotein(a), homocysteine, and pulmonary nitric oxide: a randomized, controlled, crossover trial. *Circulation* 2002;106(11):1327-32.
16. Kocyigit A, Koçlu AA, Keleş H. Effects of pistachio nuts consumption on plasma lipid profile and oxidative status in healthy volunteers. *Nutrition, metabolism, and cardiovascular diseases : NMCD* 2006;16(3):202-9.
17. Sheridan MJ, Cooper JN, Erario M, et al. Pistachio nut consumption and serum lipid levels. *Journal of the American College of Nutrition* 2007;26(2):141-8.
18. Darvish Damavandi R. The Effects of Cashew Consumption on Serum Glucose, Insulin and Lipoprotein in Type 2 Diabetic Patients. *Iranian Journal of Endocrinology and Metabolism* 2012;14(4):325-34.
19. Cohen AE, Johnston CS. Almond ingestion at mealtime reduces postprandial glycemia and chronic ingestion reduces hemoglobin A(1c) in individuals with well-controlled type 2 diabetes mellitus. *Metabolism: clinical and experimental* 2011;60(9):1312-7.
20. Jenkins DJ, Kendall CW, Banach MS, et al. Nuts as a replacement for carbohydrates in the diabetic diet. *Diabetes care* 2011;34(8):1706-11.
21. Li SC, Liu YH, Liu JF, et al. Almond consumption improved glycemic control and lipid profiles in patients with type 2 diabetes mellitus. *Metabolism: clinical and experimental* 2011;60(4):474-9.
22. Wang X, Li Z, Liu Y, et al. Effects of pistachios on body weight in Chinese subjects with metabolic syndrome. *Nutr J* 2012;11:20.
23. Dworatzek PD, Arcudi K, Gougeon R, et al. Clinical Practice Guidelines Nutrition Therapy. *Can J Diabetes* 2013;37(Supplement 1):S45-S55.
24. Higgins JPaG, Sally. Cochrane Handbook for Systematic Reviews of Interventions. In: collaboration TC, editor, 2011.
25. Graf C, Battisti WP, Bridges D, et al. Research Methods & Reporting. Good publication practice for communicating company sponsored medical research: the GPP2 guidelines. *Bmj* 2009;339:b4330.
26. US Food and Drug Administration. Guidance for Industry: Evidence-Based Review System for the Scientific Evaluation of Health Claims - Final, 2009.
27. Alberti KG, Eckel RH, Grundy SM, et al. Harmonizing the metabolic syndrome: a joint interim statement of the International Diabetes Federation Task Force on Epidemiology and Prevention; National Heart, Lung, and Blood Institute; American Heart Association; World Heart Federation; International Atherosclerosis Society; and International Association for the Study of Obesity. *Circulation* 2009;120(16):1640-5.
28. Heyland DK, Novak F, Drover JW, J et al. Should immunonutrition become routine in critically ill patients? A systematic review of the evidence. *JAMA : the journal of the American Medical Association* 2001;286(8):944-53.
29. Elbourne DR, Altman DG, Higgins JP, et al. Meta-analyses involving cross-over trials: methodological issues. *International journal of epidemiology* 2002;31(1):140-9.

- 1
  - 2
  - 3
  - 4
  - 5
  - 6
  - 7
  - 8
  - 9
  - 10
  - 11
  - 12
  - 13
  - 14
  - 15
  - 16
  - 17
  - 18
  - 19
  - 20
  - 21
  - 22
  - 23
  - 24
  - 25
  - 26
  - 27
  - 28
  - 29
  - 30
  - 31
  - 32
  - 33
  - 34
  - 35
  - 36
  - 37
  - 38
  - 39
  - 40
  - 41
  - 42
  - 43
  - 44
  - 45
  - 46
  - 47
  - 48
  - 49
  - 50
  - 51
  - 52
  - 53
  - 54
  - 55
  - 56
  - 57
  - 58
  - 59
  - 60
30. Sabate J, Fraser GE, Burke K, et al. Effects of walnuts on serum lipid levels and blood pressure in normal men. *The New England journal of medicine* 1993;328(9):603-7.
31. Spiller GA, Jenkins DA, Bosello O, et al. Nuts and plasma lipids: an almond-based diet lowers LDL-C while preserving HDL-C. *Journal of the American College of Nutrition* 1998;17(3):285-90.
32. Morgan WA, Clayshulte BJ. Pecans lower low-density lipoprotein cholesterol in people with normal lipid levels. *J Am Diet Assoc* 2000;100(3):312-8.
33. Zambon D, Sabate J, Munoz S, et al. Substituting walnuts for monounsaturated fat improves the serum lipid profile of hypercholesterolemic men and women. A randomized crossover trial. *Annals of internal medicine* 2000;132(7):538-46.
34. Iwamoto M, Imaizumi K, Sato M, et al. Serum lipid profiles in Japanese women and men during consumption of walnuts. *European journal of clinical nutrition* 2002;56(7):629-37.
35. Lovejoy JC, Most MM, Lefevre M, et al. Effect of diets enriched in almonds on insulin action and serum lipids in adults with normal glucose tolerance or type 2 diabetes. *The American journal of clinical nutrition* 2002;76(5):1000-6.
36. Sabate J, Haddad E, Tanzman JS, et al. Serum lipid response to the graduated enrichment of a Step I diet with almonds: a randomized feeding trial. *The American journal of clinical nutrition* 2003;77(6):1379-84.
37. Tapsell LC, Gillen LJ, Patch CS, et al. Including walnuts in a low-fat/modified-fat diet improves HDL cholesterol-to-total cholesterol ratios in patients with type 2 diabetes. *Diabetes care* 2004;27(12):2777-83.
38. Tamizifar B, Rismankarzadeh, M., Vosoughi, A., et al. A low-dose almond-based diet decreases LDL-C while preserving HDL-C. *Archives of Iranian Medicine* 2005;8(1):45-51.
39. Kurlandsky SBaS, Kim S. Cardioprotective effects of chocolate and almond consumption in healthy women. *Nutrition Research* 2006;26:509-16.
40. Mukuddem-Petersen J, Stonehouse Oosthuizen W, et al. Effects of a high walnut and high cashew nut diet on selected markers of the metabolic syndrome: a controlled feeding trial. *The British journal of nutrition* 2007;97(6):1144-53.
41. Gebauer SK, West SG, Kay CD, et al. Effects of pistachios on cardiovascular disease risk factors and potential mechanisms of action: a dose-response study. *The American journal of clinical nutrition* 2008;88(3):651-9.
42. Griel AE, Cao Y, Bagshaw DD, et al. A macadamia nut-rich diet reduces total and LDL-cholesterol in mildly hypercholesterolemic men and women. *The Journal of nutrition* 2008;138(4):761-7.
43. Rajaram S, Haddad EH, Mejia A, et al. Walnuts and fatty fish influence different serum lipid fractions in normal to mildly hyperlipidemic individuals: a randomized controlled study. *The American journal of clinical nutrition* 2009;89(5):1657S-63S.
44. Tapsell LC, Batterham MJ, Teuss G, et al. Long-term effects of increased dietary polyunsaturated fat from walnuts on metabolic parameters in type II diabetes. *European journal of clinical nutrition* 2009;63(8):1008-15.
45. Ma Y, Njike VY, Millet J, et al. Effects of walnut consumption on endothelial function in type 2 diabetic subjects: a randomized controlled crossover trial. *Diabetes care* 2010;33(2):227-32.



- 1  
2  
3  
4  
5  
6  
7  
8  
9  
10  
11  
12  
13  
14  
15  
16  
17  
18  
19  
20  
21  
22  
23  
24  
25  
26  
27  
28  
29  
30  
31  
32  
33  
34  
35  
36  
37  
38  
39  
40  
41  
42  
43  
44  
45  
46  
47  
48  
49  
50  
51  
52  
53  
54  
55  
56  
57  
58  
59  
60
46. Wien M, Bleich D, Raghuwanshi M, et al. Almond consumption and cardiovascular risk factors in adults with prediabetes. *Journal of the American College of Nutrition* 2010;29(3):189-97.
  47. Wu H, Pan A, Yu Z, et al. Lifestyle counseling and supplementation with flaxseed or walnuts influence the management of metabolic syndrome. *The Journal of nutrition* 2010;140(11):1937-42.
  48. Casas-Agustench P, Lopez-Uriarte P, Bullo M, et al. Effects of one serving of mixed nuts on serum lipids, insulin resistance and inflammatory markers in patients with the metabolic syndrome. *Nutrition, metabolism, and cardiovascular diseases : NMCD* 2011;21(2):126-35.
  49. Tey SL, Brown R, Gray A, et al. Nuts improve diet quality compared to other energy-dense snacks while maintaining body weight. *J Nutr Metab* 2011;2011:357350.
  50. Foster GD, Shantz KL, Vander Veur SS, et al. A randomized trial of the effects of an almond-enriched, hypocaloric diet in the treatment of obesity. *The American journal of clinical nutrition* 2012;96(2):249-54.
  51. Katz DL, Davidhi A, Ma Y, et al. Effects of walnuts on endothelial function in overweight adults with visceral obesity: a randomized, controlled, crossover trial. *Journal of the American College of Nutrition* 2012;31(6):415-23.
  52. Anderson ADA, M. M. Jacobson, J. L. Popko, M. R. et al.. Metabolic effects of bedtime pistachio consumption for 6 weeks in overweight persons. *FASEB* 2013;27.
  53. Berryman CEW, S. G. Bordi, P. L. Fleming, J. A. et al. Daily inclusion of almonds (1.5 ounces) in a cholesterol-lowering diet maintains HDL-cholesterol and HDL subclasses in mildly hypercholesterolemic adults. *Annals of Nutrition and Metabolism* 2013;63:1338.
  54. Damavandi RD, Eghtesadi S, Shidfar F, et al. Effects of hazelnuts consumption on fasting blood sugar and lipoproteins in patients with type 2 diabetes. *Journal of research in medical sciences : the official journal of Isfahan University of Medical Sciences* 2013;18(4):314-21.
  55. Sauder KAM, C. E. Kris-Etherton, P. M. Ulbrecht, J. S. et al. Effect of pistachios on lipids, lipoproteins, glucose metabolism, and insulin sensitivity in type 2 diabetes. *FASEB* 2013;27.
  56. Tan SY, Mattes RD. Appetitive, dietary and health effects of almonds consumed with meals or as snacks: a randomized, controlled trial. *European journal of clinical nutrition* 2013;67(11):1205-14.
  57. Tey SL, Gray AR, Chisholm AW, et al. The dose of hazelnuts influences acceptance and diet quality but not inflammatory markers and body composition in overweight and obese individuals. *The Journal of nutrition* 2013;143(8):1254-62.
  58. Gulati S, Misra A, Pandey RM, et al. Effects of pistachio nuts on body composition, metabolic, inflammatory and oxidative stress parameters in Asian Indians with metabolic syndrome: a 24-wk, randomized control trial. *Nutrition* 2014;30(2):192-7.
  59. Wu L, Piotrowski K, Rau T, et al. Walnut-enriched diet reduces fasting non-HDL-cholesterol and apolipoprotein B in healthy Caucasian subjects: a randomized

- 1  
2  
3 controlled cross-over clinical trial. *Metabolism: clinical and experimental*  
4 2014;63(3):382-91.
- 5  
6 60. Schutte AE, Van Rooyen JM, Huisman HW, et al. Modulation of baroreflex sensitivity  
7 by walnuts versus cashew nuts in subjects with metabolic syndrome. *American*  
8 *journal of hypertension* 2006;19(6):629-36.
- 9  
10 61. Jenkins DJ, Kendall CW, Marchie A, et al. Almonds reduce biomarkers of lipid  
11 peroxidation in older hyperlipidemic subjects. *The Journal of nutrition*  
12 2008;138(5):908-13.
- 13  
14 62. West SG, Gebauer SK, Kay CD, et al. Diets containing pistachios reduce systolic  
15 blood pressure and peripheral vascular responses to stress in adults with  
16 dyslipidemia. *Hypertension* 2012;60(1):58-63.
- 17  
18 63. Holligan SW, S. G. Gebauer, S. K. Kay, C. D. et al. A moderate-fat diet with  
19 pistachios lowers small-dense LDL and improves markers of insulin sensitivity in  
20 subjects with moderately-elevated cholesterol levels. *FASEB* 2013;27.
- 21  
22 64. Sabate J, Oda K, Ros E. Nut consumption and blood lipid levels: a pooled analysis  
23 of 25 intervention trials. *Arch Intern Med* 2010;170(9):821-7.
- 24  
25 65. Esposito K, Maiorino MI, Ciotola M, et al. Effects of a Mediterranean-style diet on the  
26 need for antihyperglycemic drug therapy in patients with newly diagnosed type 2  
27 diabetes: a randomized trial. *Annals of internal medicine* 2009;151(5):306-14.
- 28  
29 66. Esposito K, Maiorino MI, Ceriello A, et al. Prevention and control of type 2 diabetes  
30 by Mediterranean diet: a systematic review. *Diabetes research and clinical*  
31 *practice* 2010;89(2):97-102.
- 32  
33 67. Kris-Etherton PM, Hu FB, Ros E, et al. The role of tree nuts and peanuts in the  
34 prevention of coronary heart disease: multiple potential mechanisms. *The*  
35 *Journal of nutrition* 2008;138(9):1746S-51S.
- 36  
37 68. Shai I, Schwarzfuchs D, Henkin Y, et al. Weight loss with a low-carbohydrate,  
38 Mediterranean, or low-fat diet. *The New England journal of medicine*  
39 2008;359(3):229-41.
- 40  
41 69. Azadbakht L, Fard NR, Karimi M, et al. Effects of the Dietary Approaches to Stop  
42 Hypertension (DASH) eating plan on cardiovascular risks among type 2 diabetic  
43 patients: a randomized crossover clinical trial. *Diabetes care* 2011;34(1):55-7.
- 44  
45 70. Sievenpiper JL, Dworatzek PD. Food and Dietary Pattern-Based  
46 Recommendations: An Emerging Approach to Clinical Practice Guidelines for  
47 Nutrition Therapy in Diabetes. *Canadian Journal of Diabetes* 2013;37:51-57.
- 48  
49 71. Josse AR, Kendall CW, Augustin LS, et al. Almonds and postprandial glycemia--a  
50 dose-response study. *Metabolism: clinical and experimental* 2007;56(3):400-4.
- 51  
52 72. Mozaffarian D, Capewell S. United Nations' dietary policies to prevent  
53 cardiovascular disease. *Bmj* 2011;343:d5747.
- 54  
55 73. Jenkins DJ, Jones PJ, Lamarche B, et al. Effect of a dietary portfolio of cholesterol-  
56 lowering foods given at 2 levels of intensity of dietary advice on serum lipids in  
57 hyperlipidemia: a randomized controlled trial. *JAMA : the journal of the American*  
58 *Medical Association* 2011;306(8):831-9.
- 59  
60 74. Sabate J, Cordero-Macintyre Z, Siapco G, et al. Does regular walnut consumption  
lead to weight gain? *The British journal of nutrition* 2005;94(5):859-64.



- 1  
2  
3  
4  
5  
6  
7  
8  
9  
10  
11  
12  
13  
14  
15  
16  
17  
18  
19  
20  
21  
22  
23  
24  
25  
26  
27  
28  
29  
30  
31  
32  
33  
34  
35  
36  
37  
38  
39  
40  
41  
42  
43  
44  
45  
46  
47  
48  
49  
50  
51  
52  
53  
54  
55  
56  
57  
58  
59  
60
75. Almario RU, Vonghavaravat V, Wong R, et al. Effects of walnut consumption on plasma fatty acids and lipoproteins in combined hyperlipidemia. *The American journal of clinical nutrition* 2001;74(1):72-9.
76. Jenkins DJ, Kendall CW, Popovich DG, et al. Effect of a very-high-fiber vegetable, fruit, and nut diet on serum lipids and colonic function. *Metabolism: clinical and experimental* 2001;50(4):494-503.
77. Appel LJ, Moore TJ, Obarzanek E, et al. A clinical trial of the effects of dietary patterns on blood pressure. DASH Collaborative Research Group. *The New England journal of medicine* 1997;336(16):1117-24.
78. Sacks FM, Svetkey LP, Vollmer WM, et al. Effects on blood pressure of reduced dietary sodium and the Dietary Approaches to Stop Hypertension (DASH) diet. DASH-Sodium Collaborative Research Group. *The New England journal of medicine* 2001;344(1):3-10.
79. Begg C, Cho M, Eastwood S, et al. Improving the quality of reporting of randomized controlled trials. The CONSORT statement. *JAMA : the journal of the American Medical Association* 1996;276(8):637-9.
80. Barnard ND, Cohen J, Jenkins DJ, et al. A low-fat vegan diet and a conventional diabetes diet in the treatment of type 2 diabetes: a randomized, controlled, 74-wk clinical trial. *The American journal of clinical nutrition* 2009;89(5):1588S-96S.
81. Rizzo NS, Sabate J, Jaceldo-Siegl K, et al. Vegetarian dietary patterns are associated with a lower risk of metabolic syndrome: the adventist health study 2. *Diabetes care* 2011;34(5):1225-7.
82. Jenkins DJ, Kendall CW, Marchie A, et al. The effect of combining plant sterols, soy protein, viscous fibers, and almonds in treating hypercholesterolemia. *Metabolism: clinical and experimental* 2003;52(11):1478-83.
83. Jenkins DJ, Kendall CW, Marchie A, et al. Direct comparison of a dietary portfolio of cholesterol-lowering foods with a statin in hypercholesterolemic participants. *The American journal of clinical nutrition* 2005;81(2):380-7.

**Table 1.** Characteristics of RCTs Investigating the effect of Tree Nuts on Criteria of the MetS  
 MetS: metabolic syndrome; DM2: type 2 diabetes mellitus; OW: overweight; HLP: hyperlipidemic; NL-HLP: normal to mildly hyperlipidemic; HC: Hypercholesterolemic; NL-HC: normal to hypercholesterolemic; M: men; W: women; BMI: body mass index; OP: out-patient; IP: In-patient; USA: United States of America; SUPP: supplement; Met: metabolic; DA: dietary advice; N/A: not available; AHA: American Heart Association; AAD: Average American Diet; NCEP: National Cholesterol Education Program; CHO-LCD: Self-selected Complex Carbohydrate diet; WKS: weeks; MQS: Heyland Methodological Quality Score.

\* Companion reports: Jenkins et al, 2008 for Jenkins et al, 2002; Schutte et al, 2006 for Mukuddem-Petersen et al, 2007; West et al, 2012 and Holligan et al, 2013 for Gebauer et al, 2008.

† Baseline characteristics were given based on the number of randomized participants for Li et al, 2010  $n = 70$ ; Ma et al, 2010  $n = 24$ ; Zambon et al, 2000  $n = 55$ ; Katz et al, 2012  $n = 46$ ; Sauder et al, 2013  $n = 30$ ; Gulati et al, 2014  $n = 68$  for recruited subjects for Tapsell et al. 2009 ( $n = 50$ ), and for age for Darvish Damavandi et al, 2013 ( $n = 50$ ).

‡ Mean age was given separately for men and women.

§ Body weight is reported in kg and BMI is reported in  $\text{kg/m}^2$ . BMI is reported only when no data on weight were available.

|| Nut dose is given based on g/day, 1oz = 28 g.

¶ Median was taken from a range given. Iwamoto et al, 2010 range 50-54 g/day; Jenkins et al, 2011 range 50-75 g/day; Lovejoy et al, 2002 range 57-113 g/day; Mukuddem-Petersen et al, 2007 range 63-108 g/day; Torabian et al, 2010 range 28-64 g/day; Zambon et al, 2000 range 41-56 g/day.

\*\* Based on 2100 kcal for Griel et al, 2008 and based on 1400 kcal (~60 kg) for Gulati et al, 2014.

†† Energy from carbohydrate:fat:protein.

‡‡ Values for carbohydrates are given in geometric means.

§§ Trials with scores  $\geq 8$  were considered to be of high quality.

||| Agency funding is that from government, university, or not-for-profit health agency sources.

## FIGURE LEGENDS

**Figure 1.** Summary of evidence search and selection

**Figure 2.** Forest plot of the RCTs investigating the effect of Tree Nuts on Triglycerides. Pooled effect estimates are shown as diamonds, one each for trials conducted in otherwise healthy, dyslipidemia, metabolic syndrome criteria, diabetes and their combination (total). Paired analyses were applied to all crossover trials (20) and one substudy. Data are expressed as mean differences (MD) with 95% CI, using generic inverse-variance random-effects models. Interstudy heterogeneity was tested by using the Cochrane's Q statistic ( $I^2$ ) at a significance level of  $P < 0.10$  and quantified by  $I^2$ , levels  $\leq 50\%$  represent moderate heterogeneity,  $\geq 50\%$  represent substantial heterogeneity and  $\geq 75\%$ , considerable heterogeneity. TG = Triglycerides, mmol/L = mill moles per liter, A = Almond, AC = Almond + Chocolate, HF = High Fat, LF = Low Fat.

**Figure 3.** Pooled effect estimates are shown as diamonds, one each for trials conducted in otherwise healthy, dyslipidemia, metabolic syndrome criteria, diabetes and their combination (total). Paired analyses were applied to all crossover trials (10) and one substudy. Data are expressed as mean differences (MD) with 95% CI, using generic inverse-variance random-effects models. Interstudy heterogeneity was tested by using the Cochrane's Q statistic ( $I^2$ ) at a significance level of  $P < 0.10$  and quantified by  $I^2$ , levels  $\geq 50\%$  represent substantial heterogeneity and  $\geq 75\%$ , considerable heterogeneity. FBG = Fasting Blood Glucose; mmol/L = mill moles per liter; HF = High Fat; LF = Low Fat.

**Table 1.- Characteristics of RCTs Investigating the effect of Tree Nuts on Criteria of the MetS**

| Study, year (Reference)   | Participants        | Mean Age (SD or range), y  | Mean Body Weight or BMI (SD or range)§ | Setting         | Design    | Feeding Control | Nut type  | Nuts Dose (g/day)¶ |
|---------------------------|---------------------|----------------------------|----------------------------------------|-----------------|-----------|-----------------|-----------|--------------------|
| Sabate et al, 1993 (30)   |                     |                            |                                        |                 |           |                 |           |                    |
| Walnut Control            | 18 (18 M)           | 30                         | 73                                     | OP, USA         | Crossover | Met             | Walnut    | 84                 |
| Chisholm et al, 1998 (13) |                     |                            |                                        |                 |           |                 |           |                    |
| Walnut Control            | 16 HLP              | 45 (6.8)                   | 28.4 (4.3)                             | OP, New Zealand | Crossover | DA              | Walnut    | 78                 |
| Spiller et al, 1998 (31)  |                     |                            |                                        |                 |           |                 |           |                    |
| Almond Control            | 30 HLP              | 53 (10)                    | 66 (13)                                | OP, Italy       | Parallel  | Supp            | Almond    | 100                |
| Curb et al, 2000 (10)     |                     |                            |                                        |                 |           |                 |           |                    |
| Macadamia Control         | 30 (15 M, 15 W)     | 35.25 (18-53)              | 23 (19.1 - 28.3)                       | OP, USA         | Crossover | Met             | Macadamia | 46                 |
| Morgan et al, 2000 (32)   |                     |                            |                                        |                 |           |                 |           |                    |
| Pecan Control             | 19 (4 M, 15 W)      | 37 (12)<br>45(10)          | 24 (5)<br>24 (4)                       | OP, USA         | Parallel  | Supp            | Pecan     | 68                 |
| Zambon et al, 2000 (33)   |                     |                            |                                        |                 |           |                 |           |                    |
| Walnut Control            | 49 HC (26 M, 23 W)  | 56 (11)                    | 70.6 (12.1)                            | OP, Spain       | Crossover | Supp            | Walnut    | 48.5               |
| Rajaram et al, 2001 (14)  |                     |                            |                                        |                 |           |                 |           |                    |
| Pecan Control             | 23 (14 M, 9 W)      | 25-55                      | 74.4 (16.7)                            | OP, USA         | Crossover | Met             | Pecan     | 72                 |
| Iwamoto et al, 2002 (34)  |                     |                            |                                        |                 |           |                 |           |                    |
| Walnut Control            | 40 (20 M, 20 W)     | 23.8 (3.1)‡<br>23.6 (4.6)‡ | 22.2 (0.5)<br>20.7 (0.5)               | OP, Japan       | Crossover | Met             | Walnut    | 52¶                |
| Jenkins et al, 2002 (15)  |                     |                            |                                        |                 |           |                 |           |                    |
| Almond Control            | 27 HLP (15 M, 12 W) | 64 (9)                     | 71.2 (2.5)<br>71.0 (2.4)               | OP, Canada      | Crossover | Supp            | Almond    | 73                 |

|    |                                    |                       |             |             |                  |           |      |           |      |
|----|------------------------------------|-----------------------|-------------|-------------|------------------|-----------|------|-----------|------|
| 1  |                                    |                       |             |             |                  |           |      |           |      |
| 2  |                                    |                       |             |             |                  |           |      |           |      |
| 3  |                                    |                       |             |             |                  |           |      |           |      |
| 4  | Lovejoy et al, 2002 (35)           |                       |             |             |                  |           |      |           |      |
| 5  | High Fat Almond                    |                       |             |             |                  |           |      | Almond    |      |
| 6  | Low Fat Almond                     | 30 DM2 (13 M, 17 W)   | 53.8 (10.4) | 33.0 (5.5)  | OP, USA          | Crossover | Met  | Almond    | 85.1 |
| 7  | High Fat Control                   |                       |             |             |                  |           |      |           |      |
| 8  | Low Fat Control                    |                       |             |             |                  |           |      |           |      |
| 9  |                                    |                       |             |             |                  |           |      |           |      |
| 10 | Sabate et al, 2003 (36)            |                       |             |             |                  |           |      |           |      |
| 11 | High-Almond                        |                       |             |             |                  |           |      | Almond    | 83   |
| 12 | Low-Almond                         | 25 NL-HC (14 M, 11 W) | 41 (13)     | N/A         | OP, USA          | Crossover | Met  | Almond    | 42   |
| 13 | Control                            |                       |             |             |                  |           |      |           |      |
| 14 |                                    |                       |             |             |                  |           |      |           |      |
| 15 | Wien et al, 2003 (8)               |                       |             |             |                  |           |      |           |      |
| 16 | Almond                             | 65 OW/DM2 (28 M, 37   | 53 (2)      | 113 (5)     | OP, USA          | Parallel  | Supp | Almond    | 84   |
| 17 | Control                            | W)                    | 57 (2)      | 114 (5)     |                  |           |      |           |      |
| 18 |                                    |                       |             |             |                  |           |      |           |      |
| 19 | Tapsell et al, 2004 (37)           |                       |             |             |                  |           |      |           |      |
| 20 | Walnut                             | 37 DM2                | 57.7 (9)    | 87.6 (12.8) | OP, Australia    | Parallel  | Supp | Walnut    | 30   |
| 21 | Control                            |                       | 59.3 (7.1)  | 81.9 (11.2) |                  |           |      |           |      |
| 22 |                                    |                       |             |             |                  |           |      |           |      |
| 23 | Tamizifar et al, 2005 (38)         |                       |             |             |                  |           |      |           |      |
| 24 | Almond                             | 30 HC (17 M, 13 W)    | 56 (6.1)    | 63 (8.9)    | OP, Iran         | Crossover | Supp | Almond    | 25   |
| 25 | Control                            |                       |             |             |                  |           |      |           |      |
| 26 |                                    |                       |             |             |                  |           |      |           |      |
| 27 | Kocyigit et al, 2006 (16)          |                       |             |             |                  |           |      |           |      |
| 28 | Pistachio                          | 44 (24 M, 20 W)       | 32.8 (6.7)  | 24.2 (6.1)  | OP, Turkey       | Parallel  | DA   | Pistachio | 69   |
| 29 | Control                            |                       |             | 24.6 (5.6)  |                  |           |      |           |      |
| 30 |                                    |                       |             |             |                  |           |      |           |      |
| 31 | Kurlandsky et al, 2006 (39)        |                       |             |             |                  |           |      |           |      |
| 32 | Almond                             |                       | 41.8 (11.7) | 25.3 (3.5)  |                  |           |      | Almond    |      |
| 33 | Almond + Dark Chocolate            |                       | 46.2 (7.8)  | 27.2 (4.2)  |                  |           |      | Almond    | 60   |
| 34 | Dark chocolate                     | 47 (47 W)             | 36.5 (11.9) | 23.9 (3.3)  | OP, USA          | Parallel  | Supp |           |      |
| 35 | Control                            |                       | 51.3 (6.3)  | 26.1 (4.1)  |                  |           |      |           |      |
| 36 |                                    |                       |             |             |                  |           |      |           |      |
| 37 | Schutte et al, 2006 (60)*          |                       |             |             |                  |           |      |           |      |
| 38 | Walnut                             |                       | 45.5        | 35.9        |                  |           |      | Walnut    |      |
| 39 | Cashew                             | 62 MetS               | 45.7        | 34.7        | OP, South Africa | Parallel  | Met  | Cashew    | 85.5 |
| 40 | Control                            |                       | 44.4        | 35.5        |                  |           |      |           |      |
| 41 |                                    |                       |             |             |                  |           |      |           |      |
| 42 | Mukuddem-Petersen et al, 2007 (40) |                       |             |             |                  |           |      |           |      |
| 43 | Walnut                             | 64 MetS               | 45 (10)     | 107         | OP, South Africa | Parallel  | Met  | Walnut    | 85.5 |
| 44 |                                    |                       |             |             |                  |           |      |           |      |
| 45 |                                    |                       |             |             |                  |           |      |           |      |
| 46 |                                    |                       |             |             |                  |           |      |           |      |
| 47 |                                    |                       |             |             |                  |           |      |           |      |
| 48 |                                    |                       |             |             |                  |           |      |           |      |
| 49 |                                    |                       |             |             |                  |           |      |           |      |

|    |                           |                        |            |             |               |           |        |                  |
|----|---------------------------|------------------------|------------|-------------|---------------|-----------|--------|------------------|
| 1  |                           |                        |            |             |               |           |        |                  |
| 2  |                           |                        |            |             |               |           |        |                  |
| 3  | Cashew                    |                        |            | 99          |               |           | Cashew |                  |
| 4  | Control                   |                        |            | 106         |               |           |        |                  |
| 5  |                           |                        |            |             |               |           |        |                  |
| 6  | Sheridan et al, 2007 (17) |                        |            |             |               |           |        |                  |
| 7  | Pistachio                 | 15 HC                  | 60 (11.2)  | 175 (26)    | OP, USA       | Crossover | Supp   | Pistachio 35     |
| 8  | Control                   |                        |            |             |               |           |        |                  |
| 9  |                           |                        |            |             |               |           |        |                  |
| 10 | Gebauer et al, 2008 (41)  |                        |            |             |               |           |        |                  |
| 11 | 1 Pistachio               |                        |            |             |               |           |        | Pistachio 37     |
| 12 | 2 Pistachio               | 28 HLP (10 M, 18 W)    | 48 (7.9)   | 76.6 (13.2) | OP, USA       | Crossover | Met    | Pistachio 74     |
| 13 | Control                   |                        |            |             |               |           |        |                  |
| 14 |                           |                        |            |             |               |           |        |                  |
| 15 | Griel et al, 2008 (42)    |                        |            |             |               |           |        |                  |
| 16 | Macadamia                 | 25 HC                  | 50.2 (8.4) | 26.3 (3.3)  | OP, USA       | Crossover | Met    | Macadamia 42.5** |
| 17 | Control                   |                        |            |             |               |           |        |                  |
| 18 | Jenkins et al, 2008 (61)* |                        |            |             |               |           |        |                  |
| 19 | Almond                    | 27 HLP (15 M, 12 W)    | 64 (9)     | 71.2 (2.5)  | OP, Canada    | Crossover | Supp   | Almond 73        |
| 20 | Control                   |                        |            | 71.0 (2.4)  |               |           |        |                  |
| 21 |                           |                        |            |             |               |           |        |                  |
| 22 | Rajaram et al, 2009 (43)  |                        |            |             |               |           |        |                  |
| 23 | Walnut                    | 25 NL-HLP (14 M, 11 W) | 23-65      | 71.9 (15.5) | OP, USA       | Crossover | Met    | Walnut 42.5      |
| 24 | Control                   |                        |            | 71.7 (15.5) |               |           |        |                  |
| 25 |                           |                        |            |             |               |           |        |                  |
| 26 | Tapsell et al, 2009 (44)  |                        |            |             |               |           |        |                  |
| 27 | Walnut                    | 35 DM2†                | 54 (8.7)   | 92.3 (15.7) | OP, Australia | Parallel  | Supp   | Walnut 30        |
| 28 | Control                   |                        |            | 93.4 (3)    |               |           |        |                  |
| 29 |                           |                        |            |             |               |           |        |                  |
| 30 | Li et al, 2010 (11)       |                        |            |             |               |           |        |                  |
| 31 | Almond                    | 52 OW†                 | 45.4 (2.0) | 86 (26.8)   | OP, USA       | Parallel  | Supp   | Pistachio 53     |
| 32 | Control                   |                        | 47.3 (2.3) | 85.5 (40.2) |               |           |        |                  |
| 33 |                           |                        |            |             |               |           |        |                  |
| 34 | Ma et al, 2010 (45)       |                        |            |             |               |           |        |                  |
| 35 | Walnut                    | 22 DM2†                | 58.1 (9.2) | 89 (15.5)   | OP, USA       | Crossover | Supp   | Walnut 56        |
| 36 | Control                   |                        |            |             |               |           |        |                  |
| 37 |                           |                        |            |             |               |           |        |                  |
| 38 | Torabian et al, 2010 (12) |                        |            |             |               |           |        |                  |
| 39 | Walnut                    | 87 (38 M, 49 W)        | 54 (10.2)  | 75.6 (13.2) | OP, USA       | Crossover | Supp   | Walnut 46        |
| 40 | Control                   |                        |            |             |               |           |        |                  |
| 41 |                           |                        |            |             |               |           |        |                  |
| 42 | Wien et al, 2010 (46)     |                        |            |             |               |           |        |                  |
| 43 | Almond                    | 65 PD (17 M, 48 W)     | 53 (9)     | 82.9 (14.4) | OP, USA       | Parallel  | Supp   | Almond 58        |
| 44 | Control                   |                        | 54 (11)    | 80.5 (14.4) |               |           |        |                  |
| 45 |                           |                        |            |             |               |           |        |                  |

|    |                                    |                      |             |              |                 |           |      |            |
|----|------------------------------------|----------------------|-------------|--------------|-----------------|-----------|------|------------|
| 1  |                                    |                      |             |              |                 |           |      |            |
| 2  |                                    |                      |             |              |                 |           |      |            |
| 3  |                                    |                      |             |              |                 |           |      |            |
| 4  | Wu et al, 2010 (47)                |                      |             |              |                 |           |      |            |
| 5  | Walnut                             | 189 MetS             | 48.2 (8.4)  | 72.2 (11.4)  | OP, USA         | Parallel  | Supp | Walnut     |
| 6  | Control                            |                      | 48.6 (8)    | 70.6 (10.9)  |                 |           |      | 30         |
| 7  | Casas-Agustench et al, 2011 (48)   |                      |             |              |                 |           |      |            |
| 8  | Mixed Nuts                         | 50 MetS (28 M, 22 W) | 52.9 (8.4)  | 31.6 (2.8)   | OP, Spain       | Parallel  | Supp | Mixed Nuts |
| 9  | Control                            |                      | 50.6 (8.4)  | 30.0 (3.3)   |                 |           |      | 30         |
| 10 |                                    |                      |             |              |                 |           |      |            |
| 11 | Cohen et al, 2011 (19)             |                      |             |              |                 |           |      |            |
| 12 | Almond                             | 13 DM2 (7 M, 6 W)    | 66 (11.9)   | 96.1 (40.4)  | OP, USA         | Parallel  | Supp | Almond     |
| 13 | Control                            |                      |             | 105.1 (32.1) |                 |           |      | 28         |
| 14 | Jenkins et al, 2011 (20)           |                      |             |              |                 |           |      |            |
| 15 | Mixed Nuts                         | 79 DM2 (52 M, 27 W)  | 63 (9)      | 80 (15)      | OP, Canada      | Parallel  | Supp | Mixed nuts |
| 16 | Control                            |                      | 61 (10)     | 83 (15)      |                 |           |      | 75         |
| 17 |                                    |                      |             |              |                 |           |      |            |
| 18 | Li et al, 2011 (21)                |                      |             |              |                 |           |      |            |
| 19 | Almond                             | 20 DM2 (9 M, 11 W)   | 58 (8.9)    | 26 (3.1)     | OP, Taiwan      | Crossover | Met  | Almond     |
| 20 | Control                            |                      |             |              |                 |           |      | 56         |
| 21 |                                    |                      |             |              |                 |           |      |            |
| 22 | Tey et al, 2011 (49)               |                      |             |              |                 |           |      |            |
| 23 | Hazelnut                           | 61                   | 38.9 (14.3) | 72 (11.1)    | OP, New Zealand | Parallel  | Supp | Hazelnut   |
| 24 | Control                            |                      | 36.1 (15.2) | 67.3 (9.5)   |                 |           |      | 42         |
| 25 |                                    |                      |             |              |                 |           |      |            |
| 26 | Darvish Damavandi et al, 2012 (18) |                      |             |              |                 |           |      |            |
| 27 | Cashew                             | 43 DM2 (9 M, 34 W)   | 51 (7.9)    | 72.1 (13.1)  | OP, Iran        | Parallel  | Supp | Cashew     |
| 28 | Control                            |                      | 56 (5.7)    | 71.9 (9.7)   |                 |           |      | 30         |
| 29 |                                    |                      |             |              |                 |           |      |            |
| 30 | Foster et al, 2012 (50)            |                      |             |              |                 |           |      |            |
| 31 | Almond                             | 123 OW (11 M, 112 W) | 47 (12)     | 94 (13.1)    | OP, USA         | Parallel  | Supp | Almond     |
| 32 | Control                            |                      | 46.7 (13)   | 91.5 (11.9)  |                 |           |      | 56         |
| 33 |                                    |                      |             |              |                 |           |      |            |
| 34 | Katz et al, 2012 (51)              |                      |             |              |                 |           |      |            |
| 35 | Walnut                             | 40 OW†               | 57.4 (11.9) | 33.2 (4.4)   | OP, USA         | Crossover | Supp | Walnut     |
| 36 | Control                            |                      |             |              |                 |           |      | 56         |
| 37 |                                    |                      |             |              |                 |           |      |            |
| 38 | Wang et al, 2012 (22)              |                      |             |              |                 |           |      |            |
| 39 | Pistachios                         | 86 MetS              | 51.9 (8.8)  | 28.1 (3.2)   | OP, China       |           | Supp | Pistachio  |
| 40 | High pistachios                    |                      | 51.8 (9.4)  | 28 (4.5)     |                 |           |      | 42         |
| 41 | Control                            |                      | 50.7 (9.9)  | 28 (4.4)     |                 |           |      | 70         |
| 42 |                                    |                      |             |              |                 |           |      |            |
| 43 | West et al, 2012 (62)*             |                      |             |              |                 |           |      |            |
| 44 | 1 Pistachio                        | 28 HLP (10 M, 18 W)  | 48 (7.9)    | 76.6 (13.2)  | OP, USA         | Crossover | Met  | Pistachio  |
| 45 |                                    |                      |             |              |                 |           |      | 37         |



1  
2  
3  
4  
5  
6  
7  
8  
9  
10  
11  
12  
13  
14  
15  
16  
17  
18  
19  
20  
21  
22  
23  
24  
25  
26  
27  
28  
29  
30  
31  
32  
33  
34  
35  
36  
37  
38  
39  
40  
41  
42  
43  
44  
45  
46  
47  
48  
49

|                                    |                      |             |             |                 |           |      |           |      |
|------------------------------------|----------------------|-------------|-------------|-----------------|-----------|------|-----------|------|
| 2 Pistachio                        |                      |             |             |                 |           |      | Pistachio | 74   |
| Control                            |                      |             |             |                 |           |      |           |      |
| Anderson et al, 2013 (52)          |                      |             |             |                 |           |      |           |      |
| Pistachio                          | 22 OW                | 55 (2)      | 90 (3.6)    | OP, USA         | Parallel  | N/A  | Pistachio | 35.4 |
| Control                            |                      |             |             |                 |           |      |           |      |
| Berryman et al, 2013 (53)          |                      |             |             |                 |           |      |           |      |
| Almond                             | 53 HC                | N/A         | N/A         | OP, USA         | Crossover | N/A  | Almond    | 42.5 |
| Control                            |                      |             |             |                 |           |      |           |      |
| Darvish Damavandi et al, 2013 (54) |                      |             |             |                 |           |      |           |      |
| Hazelnut                           | 48 DM2†              | 55.7 (7.7)  | 72.1 (10.3) | OP, Iran        | Parallel  | Supp | Hazelnut  | 29   |
| Control                            |                      |             | 72 (9.6)    |                 |           |      |           |      |
| Holligan et al, 2013 (63)*         |                      |             |             |                 |           |      |           |      |
| 1 Pistachio                        |                      |             |             |                 |           |      | Pistachio | 37   |
| 2 Pistachio                        | 28 HLP (10 M, 18 W)  | 48 (7.9)    | 76.6 (13.2) | OP, USA         | Crossover | Met  | Pistachio | 74   |
| Control                            |                      |             |             |                 |           |      |           |      |
| Sauder et al, 2013 (55)            |                      |             |             |                 |           |      |           |      |
| Pistachio                          | 30 DM2 (15 M, 15 W)† | 56.1 (1.4)  | 31.2 (1.1)  | OP, USA         | Crossover | Met  | Pistachio | 73.4 |
| Control                            |                      |             |             |                 |           |      |           |      |
| Somerset et al, 2013 (9)           |                      |             |             |                 |           |      |           |      |
| Macadamia                          | 64 OW (10 M, 54 W)   | 43.7 (8.4)  | 95 (14.7)   | OP, Australia   | Parallel  | DA   | Macadamia | 46   |
| Control                            |                      | 43.2 (10.9) | 99.6 (15.2) |                 |           |      |           |      |
| Tan et al, 2014 (56)               |                      |             |             |                 |           |      |           |      |
| Almond (Breakfast)                 |                      | 32.9 (11.5) | 80.5 (15)   |                 |           |      | Almond    | 43   |
| Almond (Morning snack)             |                      | 27.8 (10.7) | 83.2 (21.1) |                 |           |      | Almond    | 43   |
| Almond (Lunch)                     | 137 OW (48 M, 89 W)  | 29.3 (13.5) | 84.8 (13.7) | OP, USA         | Parallel  | Supp | Almond    | 43   |
| Almond (Afternoon snack)           |                      | 29 (11.9)   | 81.8 (14.6) |                 |           |      | Almond    | 43   |
| Control                            |                      | 28.7 (9.6)  | 77.2 (16.8) |                 |           |      |           |      |
| Tey et al, 2013 (57)               |                      |             |             |                 |           |      |           |      |
| Hazelnut 30 g                      |                      | 43.8 (13.5) | 86.2 (11.8) |                 |           |      | Hazelnut  | 30   |
| Hazelnut 60 g                      | 107 OW (46 M, 61W)   | 42.8 (10.6) | 92 (19.6)   | OP, New Zealand | Parallel  | Supp | Hazelnut  | 60   |
| Control                            |                      | 41.1 (13.1) | 88.7 (16.7) |                 |           |      |           |      |
| Gulati et al, 2014 (58)            |                      |             |             |                 |           |      |           |      |
| Pistachio                          | 68 MetS (37 M, 31 W) | 41.6 (8.4)  | 81.6 (12.9) | OP, India       | Parallel  | DA   | Pistachio | 50** |

|    |                     |                 |            |             |             |           |      |        |
|----|---------------------|-----------------|------------|-------------|-------------|-----------|------|--------|
| 1  |                     |                 |            |             |             |           |      |        |
| 2  |                     |                 |            |             |             |           |      |        |
| 3  |                     |                 |            |             |             |           |      |        |
| 4  | Control             |                 | 43.3 (8.1) | 80.3 (10.3) |             |           |      |        |
| 5  | Wu et al, 2014 (59) |                 |            |             |             |           |      |        |
| 6  | Walnut              | 40 (10 M, 30 W) | 60 (1)     | 24.9 (0.6)  | OP, Germany | Crossover | Supp | Walnut |
| 7  | Control             |                 |            |             |             |           |      | 43     |
| 8  |                     |                 |            |             |             |           |      |        |
| 9  | <hr/>               |                 |            |             |             |           |      |        |
| 10 |                     |                 |            |             |             |           |      |        |
| 11 |                     |                 |            |             |             |           |      |        |
| 12 |                     |                 |            |             |             |           |      |        |
| 13 |                     |                 |            |             |             |           |      |        |
| 14 |                     |                 |            |             |             |           |      |        |
| 15 |                     |                 |            |             |             |           |      |        |
| 16 |                     |                 |            |             |             |           |      |        |
| 17 |                     |                 |            |             |             |           |      |        |
| 18 |                     |                 |            |             |             |           |      |        |
| 19 |                     |                 |            |             |             |           |      |        |
| 20 |                     |                 |            |             |             |           |      |        |
| 21 |                     |                 |            |             |             |           |      |        |
| 22 |                     |                 |            |             |             |           |      |        |
| 23 |                     |                 |            |             |             |           |      |        |
| 24 |                     |                 |            |             |             |           |      |        |
| 25 |                     |                 |            |             |             |           |      |        |
| 26 |                     |                 |            |             |             |           |      |        |
| 27 |                     |                 |            |             |             |           |      |        |
| 28 |                     |                 |            |             |             |           |      |        |
| 29 |                     |                 |            |             |             |           |      |        |
| 30 |                     |                 |            |             |             |           |      |        |
| 31 |                     |                 |            |             |             |           |      |        |
| 32 |                     |                 |            |             |             |           |      |        |
| 33 |                     |                 |            |             |             |           |      |        |
| 34 |                     |                 |            |             |             |           |      |        |
| 35 |                     |                 |            |             |             |           |      |        |
| 36 |                     |                 |            |             |             |           |      |        |
| 37 |                     |                 |            |             |             |           |      |        |
| 38 |                     |                 |            |             |             |           |      |        |
| 39 |                     |                 |            |             |             |           |      |        |
| 40 |                     |                 |            |             |             |           |      |        |
| 41 |                     |                 |            |             |             |           |      |        |
| 42 |                     |                 |            |             |             |           |      |        |
| 43 |                     |                 |            |             |             |           |      |        |
| 44 |                     |                 |            |             |             |           |      |        |
| 45 |                     |                 |            |             |             |           |      |        |
| 46 |                     |                 |            |             |             |           |      |        |
| 47 |                     |                 |            |             |             |           |      |        |
| 48 |                     |                 |            |             |             |           |      |        |
| 49 |                     |                 |            |             |             |           |      |        |

peer review only

1  
2  
3  
4  
5  
6  
7  
8  
9  
10  
11  
12  
13  
14  
15  
16  
17  
18  
19  
20  
21  
22  
23  
24  
25  
26  
27  
28  
29  
30  
31  
32  
33  
34  
35  
36  
37  
38  
39  
40  
41  
42  
43  
44  
45  
46  
47  
48  
49

Peer review only

1

1 **EFFECT OF TREE NUTS ON METABOLIC SYNDROME CRITERIA: A**  
 2 **SYSTEMATIC REVIEW AND META-ANALYSIS OF RANDOMIZED CONTROLLED**  
 3 **TRIALS**

4 **Running Title:** Tree Nuts and Metabolic Syndrome

5  
 6  
 7 **Sonia Blanco Mejia MD**<sup>1,2,3</sup>; **Cyril WC Kendall PhD**<sup>1,2,3,3,4</sup>; **Effie Vigiliouk HBSc**<sup>1,2,2,3</sup>;  
 8 **Livia S Augustin PhD**<sup>1,2,3</sup>; **Vanessa Ha MSc**<sup>1,2,3</sup>; **Adrian I Cozma HBSc**<sup>1,2,3</sup>; **Arash**  
 9 **Mirrahimi MSc**<sup>1,2,3,4,5</sup>; **Adriana Maroleanu BPH**<sup>3,2</sup>; **Laura Chiavaroli MSc**<sup>1,2,3</sup>; **Lawrence A**  
 10 **Leiter MD**<sup>1,2,3,5,6,5,6,7,7,8</sup>; **Russell J de Souza ScD RD**<sup>1,2,3,8,9,8</sup>; **David JA Jenkins MD PhD**  
 11 **DSc**<sup>1,2,3,5,6,5,6,7,7,8</sup>; **John L Sievenpiper MD PhD**<sup>2,-3,5,6,9-10,9</sup>

12  
 13 <sup>1</sup>Department of Nutritional Sciences, Faculty of Medicine, University of Toronto, Toronto,  
 14 Canada,-; <sup>2</sup>~~Clinical Nutrition and Risk Factor Modification Centre, St. Michael's Hospital,~~  
 15 ~~Toronto, Canada,-~~<sup>3</sup>~~Toronto~~<sup>2</sup>~~Toronto~~ 3D Knowledge Synthesis and Clinical Trials Unit,  
 16 ~~Clinical Nutrition and Risk Factor Modification Centre,~~ St. Michael's Hospital, Toronto,  
 17 Canada,-; <sup>4</sup>~~College~~<sup>3</sup>~~College~~ of Pharmacy and Nutrition, University of Saskatchewan,  
 18 Saskatoon, Saskatchewan, Canada,-; <sup>5</sup>~~School~~<sup>4</sup>~~School~~ of Medicine, Faculty of Health  
 19 ~~Sciences, Queen's University, Kingston, Ontario, Canada,-;~~<sup>6,5</sup>~~Keenan Research Center of the~~  
 20 ~~Li Ka Shing Knowledge Institute, St. Michael's Hospital, Toronto, Canada,~~<sup>6,7,6</sup>Division of  
 21 ~~Endocrinology and Metabolism,~~ St. Michael's Hospital, Toronto, Canada,-; <sup>8,7,7</sup>Department of  
 22 ~~Medicine,~~ Faculty of Medicine, University of Toronto, Toronto, Canada,-; <sup>9,8,8</sup>Department of  
 23 ~~Clinical Epidemiology & Biostatistics, Faculty of Health Sciences, McMaster University,~~  
 24 ~~Hamilton, Canada,-;~~<sup>10,9,9</sup>Department of Pathology and Molecular Medicine, Faculty of Health  
 25 ~~Sciences, McMaster University, Hamilton, Canada.~~

26  
 27  
 28 **Corresponding author:**

29 [Dr. Cyril Kendall](mailto:cyril.kendall@utoronto.ca)

30 Department of Nutritional Sciences Faculty of Medicine, University of Toronto, Toronto, ON,  
 31 Canada. [cyril.kendall@utoronto.ca](mailto:cyril.kendall@utoronto.ca)

Field Code Changed

Field Code Changed

32  
 33 **Text word count:** 45924,658

34 **Abstract Word Count:** 284300243957

35 **Tables:** 1

36 **Figures:** 32

37  
 38  
 39  
 40  
 41  
 42  
 43  
 44  
 45  
 46  
 47  
 48  
 49  
 50  
 51  
 52  
 53  
 54  
 55  
 56 Blanco Mejia et al./TreeNuts and Metabolic Syndrome/BMJ/Page | 1  
 57  
 58  
 59  
 60

37 **References:** ~~748~~35

38 **Appendices:** 3 Tables & ~~104~~ Figures

Formatted: French (France)

## ABSTRACT

41 **Objective:** To provide a broader evidence summary to inform dietary guidelines of the effect  
42 of tree nuts on criteria of the metabolic syndrome (MetS).

43 **Design:** We conducted a systematic review and meta-analysis of the effect of tree nuts on  
44 criteria of the MetS.

45 **Data sources:** We searched MEDLINE, EMBASE, CINAHL, and the Cochrane Library  
46 (through April 4, 2014).

47 **Eligibility criteria for selecting studies:** We included relevant randomized controlled trials  
48 (RCTs) of  $\geq 3$  weeks reporting at least one criterion of the MetS.

49 **Data extraction:** Two or more independent reviewers extracted all relevant data. Data were  
50 pooled using the generic inverse variance method using random effects models and  
51 expressed as mean differences (MD) with 95% confidence intervals (CI). Heterogeneity was  
52 assessed by the Cochran Q statistic  $\chi^2$  and quantified by the  $I^2$  statistic. Study quality and  
53 risk of bias were assessed.

54 **Background:** ~~Chronic disease guidelines support tree nut consumption alone or as part of~~  
55 ~~the Mediterranean, Dietary Approaches to Stop Hypertension (DASH), or Portfolio dietary~~  
56 ~~patterns to reduce cardiovascular risk, based on their favourable LDL-C lowering effect. The~~  
57 ~~effects of nuts on metabolic risk factors other than LDL-C, however, remain uncertain. We~~  
58 ~~conducted a systematic review and meta-analysis of the effect of tree nuts on criteria~~  
59 ~~metabolic syndrome (MetS) components to provide a broader evidence summary to inform~~  
60 ~~dietary guidelines.~~

61 **Methods:** ~~We searched MEDLINE, EMBASE, CINAHL, and the Cochrane Library (through~~  
62 ~~March 19, 2013~~April 4, 2014). ~~We included relevant randomized controlled trials (RCTs) of  $\geq$~~   
63 ~~3 weeks reporting at least 1 one criterion of metabolic syndrome~~MetS. ~~Two or more~~  
64 ~~independent reviewers extracted all relevant data. Data were pooled using the generic~~

~~inverse variance method using random effects models and expressed as mean differences (MD) with 95% confidence intervals (CI). Heterogeneity was assessed by Chi<sup>2</sup> and quantified by I<sup>2</sup>. Study quality was assessed.~~

**Results:** Eligibility criteria were met by ~~39 RCTs including~~ 149 RCTs including 2,226,676 participants who were otherwise healthy or had dyslipidemia, ~~metabolic syndrome~~ MetS or diabetes mellitus. Tree nut interventions lowered triglycerides ~~and fasting blood glucose compared with control diet interventions~~ (triglycerides MD = ~~-0.07-06~~ mmol/L [95% CI, ~~-0.0944~~, ~~-0.034~~ mmol/L]), ~~and fasting blood glucose (MD = -0.08 mmol/L [95% CI, -0.16, -0.01 mmol/L]) compared with control diet interventions, but had.~~ There was no effect ~~s~~ on waist circumference, HDL-C, ~~or~~ blood pressure, ~~or fasting blood glucose~~ with the direction of effect favouring tree nuts for ~~all except HDL-C waist circumference.~~ There was evidence of significant unexplained heterogeneity in all analyses (P < 0.05).

**Limitations:** ~~Most of the trials were of short duration (< 12 weeks) and of poor quality (MQS < 8). Substantial unexplained heterogeneity remained in most analyses.~~

**Conclusion:** Pooled analyses show a ~~MetS net~~ benefit of tree nuts ~~for metabolic syndrome~~ ~~MetS with through modest~~ decreases in triglycerides ~~and fasting blood glucose across nut types and with~~ no adverse effects on other criteria ~~across nut types.~~ As our conclusions are limited by the short duration and poor quality of the majority of trials, as well as significant unexplained between-study heterogeneity, there remains a need for larger, longer, high quality trials. Longer and higher quality trials are needed.

**Protocol Registration:** ClinicalTrials.gov identifier, NCT01630980

88 ~~Key words: systematic review, meta analysis, randomized trials, tree nuts, metabolic~~  
89 ~~syndrome.~~

90 **Strengths and limitations of this study**

- 91 • This is the first systematic review and meta-analysis to look at the effect of tree nuts  
92 on metabolic syndrome criteria.
- 93 • This systematic review and meta-analysis involved a large number of trials (~~36-47~~  
94 RCTs) in participants with a range of metabolic conditions.
- 95 • Most of the trials (~~69.474.4~~%) were of low quality (MQS ~~<~~ 8).
- 96 • Most of the trials (~~66.78.8~~%) were of short duration (< 12 weeks).
- 97 — Substantial inter-study heterogeneity remained unexplained.

98 ~~•~~

**Formatted:** List Paragraph, Justified, Line spacing: Double, Bulleted + Level: 1 + Aligned at: 0.25" + Indent at: 0.5", Don't hyphenate

**Formatted:** Space After: 10 pt, Line spacing: Multiple 1.15 li

**Formatted:** Font: (Default) Arial

**Formatted:** Left, Space After: 10 pt, Line spacing: Multiple 1.15 li, Hyphenate

**Formatted:** Space After: 10 pt, Line spacing: Multiple 1.15 li



**INTRODUCTION**

Dietary patterns including tree nuts have received particular attention for their cardiovascular benefits, and the Food and Drug Administration (FDA) have granted a qualified health claim to tree nuts for cardiovascular risk reduction.<sup>1</sup> General dietary guidelines<sup>2</sup> and heart health guidelines<sup>3,4</sup> also continue to recommend tree nuts alone or as part of the Mediterranean, Portfolio, and Dietary Approaches to Stop Hypertension (DASH) dietary patterns for cardiovascular disease prevention and management.

Although these recommendations are based primarily on the LDL-C lowering benefits of tree nuts,<sup>4</sup> the cardiovascular risk reduction seen with tree nuts is beyond that which would be predicted by this effect alone. The Prevención con Dieta Mediterránea (PREDIMED) trial showed that despite a non-significant effect on LDL-C early on in the trial<sup>5</sup> a Mediterranean diet supplemented with mixed nuts (30 g/day) compared with a low-fat control diet reduced major cardiovascular events by 30% in high cardiovascular risk participants.<sup>6</sup> Nut consumption of > 3 servings/week was also associated with other metabolic advantages such as a decreased risk of obesity, MetS, and diabetes.<sup>7</sup> Individual large trials of tree nuts have also shown that nuts improve criteria of the metabolic syndrome: waist circumference,<sup>8,9</sup> triglycerides,<sup>5,10-12</sup> HDL-C,<sup>13-18</sup> blood pressure,<sup>5,8</sup> and glycemic control.<sup>19-22</sup>

The overall evidence for these additional metabolic benefits, however, remains uncertain. Guidelines have not recommended tree nuts directly for managing these risk factors. Although the Canadian Diabetes Association 2013 clinical practice guidelines for nutrition therapy<sup>23</sup> did acknowledge some of these metabolic benefits, the evidence was deemed insufficient for making a recommendation. Tree nut consumption was recommended only in so far as part of Mediterranean or DASH dietary patterns.<sup>23</sup> To synthesize the evidence on which recommendations are based for the metabolic benefits of tree nuts beyond LDL-C lowering, we conducted a systematic review and meta-analysis of randomized controlled dietary trials of the effect of tree nuts on criteria of the metabolic syndrome.

Field Code Changed

130

131

## METHODS

### Protocol and Registration

We followed the guidelines of the Cochrane Handbook for Systematic Reviews of Intervention for the planning and conduct of this meta-analysis.<sup>24</sup> Reporting of results followed the Preferred Reporting Items for Systematic Reviews and Meta-Analyses (PRISMA) guidelines.<sup>25</sup> The review protocol is available at ClinicalTrials.gov (registration number: NCT01630980).

Field Code Changed

Field Code Changed

138

### Study Selection

We searched MEDLINE, EMBASE, CINAHL, and the Cochrane Library (through ~~March 19, 2013~~ April 4, 2014) to identify randomized controlled dietary trials of tree nuts. Details of the search strategy are presented in **Appendix Table 1**. The electronic database searches were supplemented by manual searches of the reference list of included trials and reviews. No language restriction was used.

We included randomized dietary trials that reported the effect of diets rich in tree nuts (almonds, Brazil nuts, cashews, hazelnuts, macadamia nuts, pecans, pine nuts, pistachios, walnuts and mixed nuts)<sup>1</sup> as a whole compared to diets without tree nuts, but matched for energy, on at least ~~4~~ one of the ~~five~~ 5 criteria of the MetS: waist circumference, triglycerides, high-density lipoprotein cholesterol (HDL-C), blood pressure and fasting blood glucose. Included trials were  $\geq 3$  weeks duration, a duration that satisfies the minimum follow-up requirement for lipid-lowering health claims by the FDA used in the scientific evaluation of lipid-lowering health claims.<sup>26</sup> We excluded trials that incorporated tree nuts as paste, oil or

Field Code Changed

Field Code Changed

skin nuts into the treatment diets and also those trials that added tree nuts as part of a dietary pattern and did not have a matched control group. The former exclusion was intended to eliminate contamination from the other nutritional aspects, and to isolate the effect of tree nuts. Where multiple intervention or control groups were presented, we only included those groups which allowed us to isolate the effect of tree nuts. When multiple

7

158 publications existed for the same trial, data from the most recent report were included.  
159 Publications including additional relevant data were used as companion reports. The MetS  
160 endpoints were selected according to the 2009 harmonized definition for MetS.<sup>27</sup>

Field Code Changed

## 162 Data Extraction

163 — Studies that met the inclusion criteria were extracted in full by **2independent**  
164 **two independent** reviewers (SBM and one of EV, LSA, VH or AM) for study characteristics  
165 and data for endpoints. Study characteristics included: study design (crossover or parallel),  
166 participant characteristics, comparator, nut dose, nut type, duration of follow-up, dietary  
167 adherence measures, macronutrient profile, statistical analysis and funding sources. All  
168 disagreements amongst reviewers were resolved by consensus.

169 The Heyland Methodological Quality Score (MQS) was used for assessment of study  
170 quality.<sup>28</sup> Scores from 0-2 points were given for each of the following evaluated criteria:  
171 methods (randomization, blinding and analysis), sample (selection, compatibility and follow-  
172 up), and intervention (protocol, co-intervention and crossovers). This scale gave a maximum  
173 MQS of 13 points. Studies with a score of  $\geq 8$  were considered of high quality.

Field Code Changed

174 The Cochrane Collaboration Risk of Bias Tool was used to assess the study risk of  
175 bias.<sup>24</sup> Trials were classified as “unclear risk of bias” when insufficient information was  
176 provided to permit judgment, “high risk of bias” when the methodological flaw was likely to  
177 have affected the true outcome and “low risk of bias” when a methodological flaw was  
178 deemed inconsequential to determine the true effect within a study. As blinding of  
179 participants in dietary trials is difficult to achieve, we scored the trials based on the intensity  
180 of the dietary advice given to the randomized groups. If treatment intensity was judged to be  
181 more intensive in one intervention over another, then trials were classified as “high risk”. If  
182 both interventions were emphasized equally, then trials were classified as “low risk of bias”.  
183 **Trials reported in an abstract format only -were not included for reporting in assessments of**  
184 **study quality scores due MQS or of bias owing to a lack of data information.”**

Field Code Changed

1  
2  
3  
4  
5  
6  
7 185 Means (SD) for baseline values, end values, change-from baseline differences, end-  
8 186 differences, and mean differences were recorded for primary endpoints (waist  
9  
10 187 circumference, triglycerides, HDL-C, blood pressure and fasting blood glucose). Reported *t*-  
11 188 values or *F*-statistics, and *P*-values for differences were also recorded. Missing information  
12 189 for any endpoint data or study details were requested directly from authors. Where SDs were  
13 190 not reported or given directly by authors, we attempted to calculate these missing SDs from  
14 191 the available statistics using methods recommended by the Cochrane Collaboration.<sup>24</sup> If this  
15 192 was not possible, then we imputed these missing SDs using a pooled correlation coefficient  
16 193 derived from a meta-analysis of correlation coefficients from those trials reporting sufficient  
17 194 data.<sup>24</sup> These correlation coefficients were then transformed into *z*-scores  $\pm$  and meta-  
18 195 analyzed using inverse-variance weighing. The pooled effect estimate from the *z*-scores was  
19 196 then back transformed to impute the missing SDs. We used a derived pooled correlation  
20 197 coefficient of 0.664-635 for triglycerides, 0.903-856 for HDL-C, 0.282-32749 for systolic blood  
21 198 pressure, 0.604-508 for diastolic blood pressure and 0.658-446 for fasting blood glucose.  
22 199 Sensitivity analyses were undertaken with correlation values of 0.25, 0.50 and 0.75 to  
23 200 determine whether the overall result of the analyses is robust to the use of a derived pooled  
24 201 correlation coefficient.

### 202 203 **Statistical Analyses**

204 Data were analyzed using Review Manager (RevMan) 5.2 (The Nordic Cochrane  
205 Centre, The Cochrane Collaboration, Copenhagen, Denmark) for primary analyses and  
206 Stata (version 12, College Station, USA) for subgroup analyses. Pooled analyses were  
207 conducted using the Generic Inverse Variance method with random effects models. Data  
208 were expressed as mean differences (MD) with 95% CI and considered significant at *P* <  
209 0.05. Paired analyses were applied to all crossover trials.<sup>29</sup> In cases where there were  
210 multiple intervention or control groups, we combined either intervention or control groups to  
211 create single pairwise comparisons with the aim of diminishing the unit-of-analysis error.<sup>24</sup>

Formatted: Font: Italic

Formatted: Font: Italic

Formatted: Font: Italic

Field Code Changed

Field Code Changed

Field Code Changed

Formatted: Font: Italic

Formatted: Font: Italic

Field Code Changed

Field Code Changed

Formatted: Font: Italic

Field Code Changed

Field Code Changed

9

212 The presence of between-studies-heterogeneity was assessed ~~(by the Cochran Q-~~  
213 ~~statistic (;~~ ~~significant significance set at  $P < 0.10$ ) and quantified by the quantified ( $I^2$~~   
214 ~~statistic)~~. An  $I^2 \leq 50\%$  ~~even though indicated “moderate” heterogeneity, but it might not be~~  
215 ~~important~~,  $\geq 50\%$  indicated “substantial” heterogeneity and  $\geq 75\%$  indicated “considerable”  
216 heterogeneity.<sup>24</sup> Analyses were stratified by participant health status: otherwise healthy,  
217 dyslipidemia, MetS criteria and type 2 diabetes based on trial entry criteria. Sources of  
218 heterogeneity were explored using sensitivity ~~analyses~~ and ~~a priori~~ subgroup analyses. ~~To~~  
219 ~~determine if any single trial exerted an undue influence on the overall results, sensitivity~~  
220 ~~analyses were preformed, in which each individual trial was removed from the meta-~~  
221 ~~analysis, and the effect size re-calculated with the remaining trials. Sensitivity analyses~~  
222 ~~were also undertaken using -different correlation coefficients of 0.25, 0.50 and 0.75 to~~  
223 ~~determine whether the overall results were robust to the use of different derived-pooled~~  
224 ~~correlation coefficients in paired analyses of crossover trials. for~~ A priori subgroup analyses  
225 ~~were done for~~ baseline values (according to MetS diagnostic criteria)<sup>27</sup>; absolute fiber  
226 intake (treatment diet  $< 25$  g/day vs.  $\geq 25$  g/day<sup>23</sup> and change in [within and between the  
227 diets]), absolute saturated fatty acid (SFA) intake (treatment diet  $< 7\%$  vs.  $\geq 7\%$  of total  
228 energy<sup>23</sup> and change in [within and between the diets]), tree nut dose ( $< 50$  g/day vs.  $\geq 50$   
229 g/day), tree nut type (almonds, Brazil nuts, cashews, hazelnuts, macadamia nuts, pecans,  
230 pine nuts, pistachios, walnuts and mixed nuts), duration of follow-up ( $< 3$  ~~months~~ vs.  $\geq 3$   
231 months), study design (crossover vs. parallel), and study quality (MQS  $< 8$  vs.  $\geq 8$ ). *Post-hoc*  
232 subgroup analyses were conducted for the difference in percent carbohydrate intake  
233 between the control and intervention arm (carbohydrate displacement). The significance of  
234 between-subgroup differences were assessed using meta-regression ( $P < 0.05$ ). ~~To~~  
235 ~~determine if any single trial exerted an undue influence on the overall results, sensitivity~~  
236 ~~analyses were preformed, in which each individual trial was removed from the meta-~~  
237 ~~analysis, and the effect size re-calculated with the remaining trials.~~ Publication bias was  
238 assessed by visual inspection of funnel plots and formally complemented by Begg's and  
239 Egger's tests.

Formatted: Font: Italic

Field Code Changed

Field Code Changed

Field Code Changed

Field Code Changed

Formatted: Font: Italic

## RESULTS

### Trial Selection

**Figure 1** shows flow of studies through the search and selection process. We identified a total of 2,490,531 reports, from which 704,752 reports were duplicates and 1,367,631 reports were deemed irrelevant (determined by review of title and abstract). The remaining 420,146 reports were reviewed in full, of which 8497 reports were excluded for not meeting inclusion criteria. A total of 3949 reports on 3847 trials<sup>8-23 30-59</sup> as well as 3-four companion reports<sup>60-63</sup> that addressed at least one criterion of the metabolic syndrome (waist circumference ~~[(125 trials, n = 1050813)],~~ triglycerides ~~[(4437 trials, n = 1,545690)],~~ HDL-C ~~[(4536 trials, n = 1,6072,142)],~~ blood pressure ~~[(2046 trials, n = 1,267955)],~~ and fasting blood glucose ~~[(4826 trials, n = 9571,360)]~~ were included).

Field Code Changed ... [1]

Formatted ... [2]

### Trial Characteristics

**Table 1** presents characteristics of the included trials. There were 3847 trials involving 3849 comparisons in 1706 in 2,211 participants. ~~Eleven-Twelve~~ trials (30.626.7%)<sup>10</sup> ~~were conducted in~~ otherwise healthy participants. Two of these trials contained a minority of participants with dyslipidemia who had been classified as otherwise healthy<sup>36 43</sup>. ~~Nine-Eleven~~ trials (2524.4%)<sup>8 18-21 35 37 44 45 54 55</sup> were conducted in participants with type 2 diabetes or a mix of patients with overweight and type 2 diabetes in one case<sup>8</sup>. The remaining trials were conducted in people with dyslipidemia (8-9 trials [22-20%]<sup>13 15 17 31 33 38 41 42 53</sup>), MetS [5 trials<sup>22 40 47 48 58</sup>], or with criteria of some MetS criteria (8-13 trials [22-228.9%]: overweight 3-7 trials<sup>9 11 50-52 56 57</sup>, full MetS [4-5 trials<sup>22, 42, 49, 50, 60</sup>], and/or prediabetes [1 trial<sup>46</sup>]). Median age for participants was 50.2 years (IQR: 42.53-7 to 55.58 years). Median body weight for participants was 81.47 kg (IQR: 72.1 to 91.75-3 kg). Most trials tended to be of considerable size, with a small (median number of participants 40 participants, ?? [(IQR: 25 to 61?? participants) to ??])(1924 [52.83.3%]) were included. The majority were conducted in the United States of America (24 trials [53.3%]). The with

Field Code Changed ... [3]

Formatted ... [4]

11

the rest were conducted in various other countries: 3 trials (8.36.7%) each in Australia, New Zealand, and Iran; 2 trials (54.4.6%) each in Canada, and Spain, Iran, and New Zealand; and 1 trial (2.28%) each in Japan, Turkey, Italy, China, Taiwan, Germany, India and South Africa. A similar number of trials used parallel (49.24 trials [53.32.8%]) and crossover (47.21 trials [46.77.2%]) designs. All trials were conducted in an outpatient setting.

Control diets included usual diets, (98 trials, 22.20%), a National Cholesterol Education Program (NCEP)-step 1 diet (5 trials, 13.91.1%), an average American Diet (3 trials, 8.36.7%), a low fat diet (2.3 trials, 5.6.7%), among others. Twenty-two-seven trials (64.60%) provided test food supplements, 124 trials (31.26.7%) provided all study foods under metabolic feeding control conditions, and 3.4 trials provided dietary advice (8.9%). Four-Five trials (11.1%) used a control diet in which a muffin or pretzel<sup>11 15 20 53</sup> or cheese sticks<sup>19</sup> were exchanged for nuts. The test and control diets were matched for energy in all cases; however 2 of the trials<sup>11 50</sup> featured a negative energy balance tree nut diet compared with a matched negative energy balance control diet. Tree nut types included almonds (13.4 trials, 28.330.6%), cashews (2 trials, 4.35.6%), hazelnuts (23 trials, 5.66.5%), macadamia nuts (3 trials, 8.36.5%), pecans (2 trials, 5.64.3%), pistachios (5.8 trials, 12.817.4%), walnuts (40.13 trials, 27.828.3%), and mixed nuts (2 trials, 5.64.3%). We were unable to find studies on Brazil nuts or pine nuts. Median nut dose intake was 53.49.3 g/day (IQR: 42 to 72.570.5 g/day). Median follow-up was 7.8 weeks (IQR: 4 to 12 weeks).

Macronutrient profiles varied across studies and between treatment and control groups, median values reported for carbohydrate intake were 48.47% (IQR: of 44 to 52.351%) for the treatment group and 50.5% (IQR: 46 to 56.857%) for the control group. Median values for fat intake were 36.535% (IQR: 34.831 to 39%) and 30.530% (IQR: 28.27.3 to 34.834%) for tree nut and control group respectively. Median values for protein intake were 16% (IQR: 15 to 48.17%) and 17% (IQR: 15 to 49.18.8%) for tree nut and control group correspondingly.

Appendix Table 2 and Appendix Figure 1 present the assessment and summary of the risk of bias by using The Heyland MQS and The Cochrane Risk of Bias Tool. The

Blanco Mejia et al./TreeNuts and Metabolic Syndrome/BMJ/Page | 11

Field Code Changed



Heyland MQS ranged from 3 to 9. ~~TwentyThirty-fivetwo~~ trials (~~69.474.4~~%) were considered to be low quality (MQS < 8) and 11 trials (~~30.625.6~~%) high quality (MQS ≥ 8). The main contributors of low scores were ~~absence of double-blinding~~ blinding of participants, and crossovers between intervention treatments, followed by sample comparability and loss of participants to follow up, and poor description of crossovers in the control group. The Cochrane Risk of Bias Tool showed that ~~in our study, for allocation concealment, 34 trials (70.8%) were unclear risk and 14 trials (29.2%) were low risk for random sequence generation; 297/48 trials (60.456.3%) were unclear risk and 192/48 trials (39.643.8%) were low risk for allocation concealment; for blinding of participants and personnel, 268/48 trials (54.28.3%) were unclear risk and 220/48 trials (45.81.7%) were low risk for blinding of participants and personnel; 5 trials (10.4%) were unclear risk, for incomplete outcome data, 35/48 trials (72.9%) were low risk, and 8/48 trials (16.7%) were high risk and 5/48 trials (10.4%) were unclear risk for incomplete outcome data; and for selective reporting, 28/47 trials (59.68.3%) were unclear risk, 189/47 trials (38.339.6%) were low risk, and 1/47 trials (2.1%) were high risk for selective reporting.~~ was considered mainly “low risk of bias” (~~blinding of participants and crossovers in our included dietary trials are not feasible is very difficult to achieve~~) and that a few studies ~~trials~~ were considered “high risk of bias” due to ~~incomplete outcome data and selective reporting.~~

Most of the trials reported research funding from an agency ~~27/3628/45 (62.275%),~~ while others were funded from a combination of agency and industry ~~5/3645 (43.911.1%) or industry alone 6/45 (13.3%).~~ One trial (2.82%) ~~was funded exclusively by industry reported no funding. Three-Five~~ trials<sup>18 38 45 52 53</sup> did not report their funding source (~~8.311.1~~%).

## Waist Circumference

**Appendix Figure 2** presents data on the effect of tree nuts on waist circumference. Tree nuts did not significantly decrease waist circumference ~~in the overall analyses~~ (MD ~~≡~~, -0.94-62 cm [95% CI, -1.9954, 0.48-30 cm]) ~~in the overall analyses~~ with evidence of ~~significant substantial~~ heterogeneity ( $I^2 = 6567\%$ ,  $P < 0.001$ ). Stratification by health status

Field Code Changed

Formatted: Font: Italic

324 failed to demonstrate a significant effect for any of the sub samples. Sensitivity analyses did  
325 not alter the results (data not shown).

326 **Appendix Table 3-A and Appendix Figure 3** present the *a priori* continuous and  
327 categorical subgroup analyses, respectively, for waist circumference. There was evidence  
328 of statistically significant effect modification by the difference in ~~SFA intake in the categorical~~  
329 ~~subgroup analyses ( $P < 0.05$ ) and by the difference in~~ carbohydrate intake in the continuous  
330 subgroup analyses ( $P < 0.05$ ) between tree nut and control interventions. ~~Trials in which tree~~  
331 ~~nuts displaced more SFA leading to larger differences between the tree nut and control~~  
332 ~~interventions were more likely to favor the control diet.~~ Trials with lower carbohydrate intakes  
333 in the tree nut intervention arms showed larger reductions in waist circumference. ~~No other~~  
334 ~~subgroup analyses were statistically significant.~~

335

### 336 Triglycerides

337 **Figure 2** presents data on the effect of tree nuts on triglycerides. Tree nuts showed a  
338 significant triglyceride-lowering effect (MD ~~=~~ -0.067 mmol/L, [95% CI, -0.043 mmol/L])  
339 in the overall analysis ~~without with evidence of moderate evidence of significant~~  
340 heterogeneity ( $I^2 = 2134\%$ ,  $P = 0.1302$ ). ~~The same effect was seen with evidence of~~  
341 ~~significant evidence of moderate~~ heterogeneity ( $I^2 = 4842\%$ ,  $P = 0.0305$ ) in the subsample of  
342 participants who were otherwise healthy (MD ~~=~~ -0.07 mmol/L [95% CI, -0.11, -0.04 mmol/L])  
343 ~~and without evidence of heterogeneity in the subsample of participants with MetS criteria (MD,~~  
344 ~~-0.09 mmol/L [95% CI, -0.18, 0.00 mmol/L]).~~ Although the reductions were not statistically  
345 significant in people with dyslipidemia ~~MetS criteria~~ or diabetes, they did not significantly  
346 differ from the reductions in participants who were otherwise healthy ~~or with MetS~~.  
347 Sensitivity analyses did not alter the results (data not shown).

348 **Appendix Table 3-B and Appendix Figure 4** present data from the *a priori*  
349 continuous and categorical subgroup analyses, respectively, for triglycerides. There was  
350 significant effect modification by nut type in categorical analyses ( $P < 0.05$ ). Pairwise  
351 comparisons showed that pecan, walnut, and pistachio interventions all significantly

Formatted: Font: Italic

352 decreased triglycerides more than almond interventions ( $P < 0.05$ ) and almond, macadamia,  
353 pecan, pistachio and walnut more than hazelnut ( $P < 0.05$ ). No other subgroup analyses  
354 were statistically significant.

### 356 HDL-C

357 **Appendix Figure 5** presents the effect of tree nuts on HDL-C. Tree nuts did not  
358 significantly affect HDL-C in the overall analysis (MD =, 0.00 mmol/L [95% CI, -0.01, 0.01  
359 mmol/L]) in the overall analysis with evidence of considerable heterogeneity ( $I^2 = 867\%$ ,  $P <$   
360 0.001). Stratification by health status failed to demonstrate a significant effect for any of the  
361 subsamples. Sensitivity analyses did not alter the results (data not shown).

362 **Appendix Table 3-C and Appendix Figure 6** present the a priori continuous and  
363 categorical subgroup analyses, respectively, for HDL-C. None of the subgroup analyses  
364 were significant.

### 366 Blood Pressure

367 **Appendix Figures 7-A and 7-B** present the effect of tree nuts on systolic and  
368 diastolic blood pressure, respectively. Tree nuts did not significantly decrease/increase  
369 either systolic (MD =, -0.240.07 mmHg [95% CI, -1.9354, 1.6945 mmHg]) or diastolic blood  
370 pressure (MD =, 0.023 mmHg [95% CI, -0.3849, 0.8354 mmHg]) in the overall analysis with  
371 evidence of substantial heterogeneity in the systolic blood pressure analysis ( $I^2 = 6453\%$ ,  $P$   
372  $< 0.001$ ) and evidence of moderate heterogeneity in the diastolic blood pressure analysis ( $I^2$   
373  $= 34\%$ ,  $P = 0.07$ ). Stratification by health status failed to demonstrate an effect for any of the  
374 subsamples. Sensitivity analyses did not alter the results (data not shown).

375 **Appendix Tables 3-D and 3-E** present the a priori continuous subgroup analyses  
376 and **Appendix Figures 8-A and 8-B** present the a priori categorical subgroup analyses for  
377 systolic and diastolic blood pressure, respectively. There was evidence of statistically  
378 significant effect modification by difference in fibre intake in both the continuous and  
379 categorical subgroup analyses and by the difference in carbohydrate intake in the

15

380 continuous subgroup analyses, both for systolic blood pressure ( $P < 0.05$  and  $P < 0.01$   
 381 respectively) between tree nut and control interventions. Trials with higher fibre intakes in the  
 382 tree nut intervention arms showed larger reductions in systolic blood pressure. Trials in  
 383 which tree nuts displaced more carbohydrates or contained lower levels of SFA intake  
 384 leading to larger differences between the tree nut and control interventions were more likely  
 385 to favour the Tree nut diet in systolic blood pressure. Change in SFA or fibre intake in the  
 386 tree nut intervention arms Tree nut intervention arms with higher fibre intake showed  
 387 reductions in diastolic blood pressure and also explained the heterogeneity in the overall  
 388 analyses reducing the residual- $I^2$  to 0.1.6%. No other subgroup analyses were statistically  
 389 significant for either systolic or diastolic blood pressure.

### 391 Fasting Blood Glucose

392 **Appendix Figure 9-3** presents the effect of tree nuts on fasting blood glucose. Tree  
 393 nuts ~~did not show a significantly decrease~~ fasting blood glucose-lowering effect in the  
 394 overall analysis (MD = -0.082 mmol/L [95% CI, -0.16, -0.041 mmol/L]); in the overall  
 395 analysis, with ~~evidence of significant~~ evidence of moderate heterogeneity ( $I^2 = 57.41\%$ ,  $pP$   
 396 < 0.0405). Stratification by health status failed to demonstrate an effect for any of the  
 397 subsamples. Sensitivity analyses did not alter the results (data not shown).

398 **Appendix Table 3-F and Appendix Figure 10-9** present *a priori* continuous and  
 399 categorical subgroup analyses, respectively, for fasting blood glucose. There was evidence  
 400 that the attained difference in SFA intake between tree nut and control interventions (in both  
 401 continuous and categorical subgroup analyses ( $P < 0.05$ )) influenced the effect of nuts on  
 402 blood glucose. Trials in which tree nuts displaced less SFA leading to smaller differences in  
 403 SFA between the tree nut and control interventions were more likely to favor the control  
 404 diet None of the subgroup analyses were significant.

### 406 Publication Bias

1  
2  
3  
4  
5  
6  
7 407 **Appendix Figure 104** presents the funnel plots for publication bias for each  
8 408 endpoint. Visual inspection of the funnel plots revealed some evidence of asymmetry in  
9  
10 409 several of the endpoints. There ~~were was a more~~ small trials with larger effect estimates  
11  
12 410 favoring tree nuts than control for waist circumference, which argues that the “small-study”  
13  
14 411 effect was actually not a source of potential bias (i.e. ~~2~~ smaller studies that favoured control  
15  
16 412 were published). On the other hand, there were more small trials with larger effect estimates  
17  
18 413 favoring control than tree nuts for triglycerides. Egger’s test confirmed these small study  
19 414 effects for triglycerides ( $P < 0.05$ ). No other evidence of small study effects was detected by  
20  
21 415 Egger’s test and Begg’s tests.

Formatted: Font: Italic

## DISCUSSION

22 416  
23  
24 417  
25  
26 418 To our knowledge, this is the first systematic review and meta-analysis to look at the  
27  
28 419 effect of tree nuts on [MetS](#) criteria ~~of the MetS~~. Our systematic review and meta-analysis  
29  
30 420 included ~~36-47~~ randomized trials in ~~1691-2,211~~ participants who were otherwise healthy or  
31  
32 421 ~~met had~~ MetS criteria, dyslipidemia, or type 2 diabetes. Tree nut consumption at a median  
33  
34 422 dose of ~50 g/day was found to decrease triglycerides significantly by ~0.~~07-06~~ mmol/L, ~~and~~  
35  
36 423 ~~to decrease fasting blood glucose significantly by ~0.08 mmol/L~~ over a median follow-up of  
37  
38 424 ~~78~~ weeks. No adverse effects were seen on waist circumference, HDL-C, ~~or blood pressure~~  
39  
40 425 ~~or fasting blood glucose~~. ~~However the direction of effect favoured tree nuts in the case of~~  
41  
42 426 ~~waist circumference, blood pressure, and fasting blood glucose~~, suggesting an overall net  
43  
44 427 metabolic benefit [of tree nuts](#).

### Results in relation to other studies

45 428  
46 429  
47 430 Our findings of a reduction in triglycerides without the expected reciprocal increase in  
48  
49 431 HDL-C are in accordance with previous evidence. Although Sabate et al<sup>64</sup> did not show a  
50  
51 432 triglyceride lowering effect of nut interventions (nonspecific to tree nuts) in overall pooled  
52  
53 433 analyses in an patient-level meta-analysis of controlled feeding trials, he did show that nut  
54  
55 434 interventions lowered triglycerides when analyses were restricted to a subsample of

Field Code Changed

435 participants with baseline triglycerides  $\geq 1.7$ mmol/L, without an increase in HDL-C. A  
 436 triglyceride benefit has also been seen in individual trials and meta-analyses of trials  
 437 investigating the effect of a Mediterranean dietary pattern containing tree nuts in people with  
 438 diabetes.<sup>65 66</sup> This triglyceride-lowering effect, however, was accompanied by an HDL-C  
 439 increasing effect.<sup>65 66</sup> Our findings add to these data by showing a similar triglyceride-  
 440 lowering effect, especially for walnuts, pistachios, **macadamia** and pecans, in the absence of  
 441 an HDL-C increasing effect, across all subsamples of participants, without differences in  
 442 triglycerides by baseline levels. The lipid benefits of tree nuts can be attributed to numerous  
 443 cardioprotective nutrients such as unsaturated fatty acids, plant protein, fibre and  
 444 phytochemicals.<sup>67</sup> The fibre content and high unsaturated fat content with its ability to  
 445 displace high glycemic index carbohydrate from the diet and so effect a lower glycemic load  
 446 diet are likely the main factors in lowering triglycerides.<sup>20</sup>

Field Code Changed  
 Field Code Changed  
 Field Code Changed  
 Field Code Changed

Field Code Changed

Field Code Changed

448 Our results of a reduction in fasting blood glucose are in accordance with an  
 449 evidence-based review for the 2013 CDA guidelines that found evidence to support small  
 450 improvements in overall glycemic control in people with diabetes.<sup>23</sup> Individual trials have  
 451 shown evidence of improvements in other aspects of glycemic control.<sup>19-22</sup> A fasting blood  
 452 glucose-decreasing effect of tree nuts has also been seen in long-term glycemic control as  
 453 assessed by HbA1c for tree nuts as part of Mediterranean<sup>65 66 68</sup> and DASH<sup>69</sup> dietary patterns  
 454 in people with diabetes.<sup>70</sup> However, the diabetes subgroup in our analyses did not show a  
 455 statistical decrease in fasting blood glucose, this may relate to the statistical approach used  
 456 for missing values in the crossover studies, where the constant correlation used to calculate  
 457 CIs was derived from all health subgroups. Therefore, CIs were slightly wider than if the  
 458 correlation value was derived only from trials on participants with diabetes (in press by  
 459 Viguiouk et al). The ability of tree nuts to decrease fasting blood glucose in our analyses  
 460 may relate to the proposed displacement mechanism by which tree nuts reduce the glycemic  
 461 load of the diet, as this mechanism would be expected to improve long-term glycemic control

Field Code Changed  
 Field Code Changed  
 Field Code Changed

Field Code Changed  
 Field Code Changed  
 Field Code Changed  
 Field Code Changed  
 Field Code Changed

462 ~~through a reduction in postprandial glycaemia,<sup>71</sup> and possibly decrease insulin resistance,<sup>48</sup>~~  
 463 ~~neither of which were not-assessed in our review.~~

Field Code Changed  
 Field Code Changed

464 The lack of effect we observed on waist circumference reinforces the view that tree  
 465 nuts do not have an adverse effect on body weight. Dietary guidelines have raised concerns  
 466 about the potential of tree nuts to contribute to weight gain,<sup>2</sup> owing to their high energy  
 467 density; however prospective cohort studies and randomized trials have shown the opposite.  
 468 A pooled analysis of Harvard cohorts showed an increase in one serving per day of nuts was  
 469 associated with significant weight loss.<sup>72</sup> Controlled trials of tree nuts alone or as part of  
 470 Mediterranean,<sup>65 66 68</sup> Portfolio,<sup>73</sup> or DASH<sup>69</sup> dietary patterns have shown neutral or weight  
 471 loss effects, and no influence on body fat mass or body fat percentage.<sup>74</sup> Dietary patterns  
 472 that incorporated nuts have reported weight loss under isocaloric conditions or no weight  
 473 gain under hypercaloric feeding conditions,<sup>75</sup> perhaps because of the metabolically-available  
 474 energy from nuts is less than the calculated value, as incomplete digestion of nuts leading to  
 475 energy excretion in the feces.<sup>76</sup> Our findings further suggest that tree nuts do not have a  
 476 significant effect on the most metabolically adverse weight gain involving an increase in  
 477 waist circumference. We observed a tendency for a reduction in waist circumference,  
 478 especially where nuts displaced high glycemic index carbohydrate to effect a lower-glycemic  
 479 load diet (as opposed to where tree nuts were used to displace saturated fat). These data  
 480 suggest that the inclusion of a greater number of long-term trials in which tree nuts are used  
 481 to displace high-glycemic index carbohydrate to effect a low-glycemic load diet may yet  
 482 demonstrate a waist circumference benefit in future meta-analyses.

Field Code Changed

Formatted: Font: (Default) Arial

Field Code Changed

483 We were surprised not to see an improvement in blood pressure ~~and fasting blood~~  
 484 ~~glucose.~~ Individual trials have shown evidence of improvements in blood pressure<sup>5 8</sup> ~~and~~  
 485 ~~other aspects of glycemic control.<sup>19-22</sup> An evidence-based review for the 2013 CDA~~  
 486 ~~guidelines also found evidence to support small improvements in overall glycemic control in~~  
 487 ~~people with diabetes.<sup>79</sup> A blood pressure-decreasing effect of tree nuts has also been seen~~  
 488 in the context of Portfolio<sup>73</sup> and DASH<sup>69 77 78</sup> dietary patterns across a range of participant  
 489 types. ~~The same is true for improvements in long-term glycemic control as assessed by~~

Field Code Changed



19

490 ~~HbA1c for tree nuts as part of Mediterranean<sup>67, 68, 72</sup> and DASH<sup>74</sup> dietary patterns in people~~  
 491 ~~with diabetes. The inability of tree nuts to decrease fasting blood glucose in our analyses~~  
 492 ~~may relate to the proposed displacement mechanism by which tree nuts reduce the glycemic~~  
 493 ~~load of the diet, as this mechanism would be expected to improve long term glycemic control~~  
 494 ~~through a reduction in postprandial glycaemia, which was not assessed.~~ As elevated ~~the~~  
 495 blood pressure in the metabolic syndrome often relates to the underlying insulin resistance,  
 496 the lack of effect on BP may also be explained by a lack of trials using tree nuts to displace  
 497 high-glycemic index carbohydrate to decrease the low-glycemic load of the diet (trials taking  
 498 advantage of this mechanism were more likely to show reductions than trials that did not in  
 499 subgroup analyses). Alternatively, it may be explained by the need for tree nuts to be  
 500 combined with the other aspects of a DASH ~~diet~~dietary pattern, which collectively result in  
 501 larger amounts of potassium, calcium, magnesium, dietary fibre, and protein.

Field Code Changed

### 503 Limitations

504 There are some limitations to our work. First, the majority of trials (~~69.4~~74.4%) were  
 505 of low quality (MQS < 8). Factors that contributed the most to low quality scores were  
 506 incomplete outcome data and poor reporting. However, in our *a priori* subgroup analyses  
 507 there was no effect modification by study quality. Second, the risk of bias remains uncertain  
 508 for most of the available trials owing to poor reporting. This point is particularly concerning  
 509 given that the majority of the trials were conducted after the Consolidated Standards of  
 510 Reporting Trials (CONSORT) guidelines were first reported in 1993 and published in 1996.<sup>79</sup>  
 511 Third, the majority of the available trials were < 3 months, which is perhaps, too short a time  
 512 to observe an effect for some outcomes (waist circumference, ~~fasting glucose~~blood  
 513 pressure). This also made it difficult to assess the sustainability of the observed effects over  
 514 the long term. We did not, however, observe significant effect modification by follow-up in  
 515 categorical or continuous subgroup analyses for any of the endpoints. Finally, our analyses  
 516 were complicated by significant unexplained heterogeneity for waist circumference, ~~and~~  
 517 HDL-C, ~~and fasting blood glucose~~, which we attempted to accommodate using of random

Formatted: Font: Italic

Field Code Changed

518 effects models, remains a source of uncertainty in the summary effect estimates for these  
519 endpoints.

520

## 521 Practical Implications

522 Tree nuts are a high-energy food that contain cardioprotective nutrients.<sup>67</sup> Even  
523 though the median fat intake (~~36~~~~33.6~~% of the tree nut containing diets was above that of the  
524 ~~control (30.5%), but both within the~~ recommended (20-35%) by dietary guidelines,<sup>23</sup> a  
525 beneficial effect was seen ~~when compared to a control diet that tended to meet~~  
526 ~~macronutrient recommendations only in the tree nut containing diets~~. The median dose of  
527 ~50 g/day tree nuts can be easily integrated as a snack, into a dietary pattern or as a  
528 substitution for animal fats or carbohydrates. No increase in side effects compared with  
529 control diets were reported in any of the trials, suggesting diets which emphasize tree nuts  
530 are as safe as conventional diets (except in individuals with tree nut allergies).

531

## 532 Conclusion

533 In conclusion, our pooled analyses indicate that daily tree nut consumption has an  
534 overall ~~net modest~~ metabolic benefit, through ~~modest~~ decreases ~~in~~ triglycerides ~~and~~  
535 ~~fasting blood glucose~~ while preserving waist circumference, HDL-C, ~~and~~ blood pressure ~~and~~  
536 ~~fasting blood glucose~~ in people who are otherwise healthy or have -dyslipidemia, ~~criteria of~~  
537 ~~the~~-MetS ~~criteria~~, or -type 2 diabetes. These data support recommendations to consume tree  
538 nuts alone or as part of heart healthy dietary patterns such as the Mediterranean, Portfolio,  
539 Vegetarian, and DASH ~~dietary patterns~~ as a means for improving metabolic control.<sup>69 80-83</sup>  
540 ~~Careful interpretation of the results is advised, as~~ Our conclusions are limited by ~~the small~~  
541 ~~sample sizes, the~~ -short duration, ~~and~~ poor quality of the majority of trials, ~~as well as~~ the  
542 presence of significant unexplained heterogeneity in our analyses. These limitations  
543 highlight the need for larger, longer, high quality trials. Trials in which tree nuts are used to  
544 displace high-glycemic index carbohydrate to decrease the glycemic load of the diet will be

Field Code Changed

Field Code Changed

Field Code Changed

Field Code Changed

545 especially relevant to understand the role of tree nuts in reducing cardiometabolic risk  
546 associated with the metabolic syndrome.

547

#### 548 **Contributions**

549 **Conception and design:** S Blanco Mejia, CWC Kendall, LS Augustin, JL Sievenpiper.

550 **Analysis or interpretation of the data:** S Blanco Mejia, CWC Kendall, E Viguiouk, LS

551 Augustin, V Ha, A Cozma, A Mirrahimi, A Maroleanu, L Chiavaroli, LA Leiter, RJ de Souza,  
552 DJA Jenkins, JL Sievenpiper.

553 **Drafting of the article:** S Blanco Mejia, JL Sievenpiper.

554 **Critical revision of the article for important intellectual content:** S Blanco Mejia, CWC

555 Kendall, E Viguiouk, LS Augustin, V Ha, A Cozma, A Mirrahimi, A Maroleanu, L Chiavaroli,  
556 LA Leiter, RJ de Souza, DJA Jenkins, JL Sievenpiper.

557 **Final approval of the article:** S Blanco Mejia, CWC Kendall, E Viguiouk, LS Augustin, V

558 Ha, A Cozma, A Mirrahimi, A Maroleanu, L Chiavaroli, LA Leiter, RJ de Souza, DJA  
559 Jenkins, JL Sievenpiper.

560 **Statistical expertise:** RJ de Souza.

Formatted: French (France)

561 **Obtaining of funding:** CWC Kendall, DJA Jenkins, JL Sievenpiper.

562 **Administrative, technical, or logistic support:** CWC Kendall, E Viguiouk, LS Augustin, V  
563 Ha, A Cozma, A Mirrahimi, A Maroleanu, L Chiavaroli.

564 **Collection and assembly of data:** S Blanco Mejia, E Viguiouk, LS Augustin, V Ha, A  
565 Cozma, A Maroleanu.

566 **Guarantors:** CWC Kendall and JL Sievenpiper.

567

#### 568 **Transparency declaration**

569 The manuscript's guarantors affirms that the manuscript is an honest, accurate, and  
570 transparent account of the study being reported; no important aspects of the study have  
571 been omitted; and any discrepancies from the study as planned (and, if relevant, registered)  
572 have been explained.

573

**Acknowledgements**

This work was supported by the International Tree Nut Council Nutrition Research & Education Foundation (Davis, CA), [and the Canadian Institutes of Health Research \(funding reference number, 129920\) through the Canada-Wide Human Nutrition Trialists' Network \(NTN\). The Diet, Digestive tract, and Disease \(3-D\) Centre, funded through the Canada Foundation for Innovation \(CFI\) and the Ministry of Research and Innovation's Ontario Research Fund \(ORF\), provided the infrastructure for the conduct of this project.](#) **VH** and **AIC** were funded by Province of Ontario Graduate Scholarships. **AIC** was also funded by a Canadian Institutes of Health Research (CIHR)-Fredrick Banting and Charles Best Canada Graduate Scholarship and Banting and Best Diabetes Centre (BBDC)-Novo Nordisk Studentship. **RJdS** was funded by a CIHR Postdoctoral Fellowship Award. **DJAJ** was funded by the Government of Canada through the Canada Research Chair Endowment. None of the sponsors had a role in any aspect of the present study, including design and conduct of the study; collection, management, analysis, and interpretation of the data; and preparation, review, [decision to publish](#) or approval of the manuscript.

We wish to thank Teruko Kishibe for her help in the development of search terms used.

**Exclusive Licence**

The Corresponding Author on behalf of all authors grants an exclusive licence on a worldwide basis to the BMJ Publishing Group Ltd and its Licensees to permit this article to be published in BMJ editions and any other BMJ PGL products and sublicences to exploit all subsidiary rights, as set out in the licence (<http://resources.bmj.com/bmj/authors/checklists-forms/licence-for-publication>).

Field Code Changed

**Ethical Approval**

Not required.

1  
2  
3  
4  
5  
6  
7  
8  
9  
10  
11  
12  
13  
14  
15  
16  
17  
18  
19  
20  
21  
22  
23  
24  
25  
26  
27  
28  
29  
30  
31  
32  
33  
34  
35  
36  
37  
38  
39  
40  
41  
42  
43  
44  
45  
46  
47  
48  
49  
50  
51  
52  
53  
54  
55  
56  
57  
58  
59  
60

## Potential Conflicts of Interest

All authors have completed the Unified Competing Interest form at [www.icmje.org/coi\\_disclosure.pdf](http://www.icmje.org/coi_disclosure.pdf) (available on request from the corresponding author) and declare: **SBM, LSA, AM, AIC, EV, AM and LAL** declare; no conflicts of interest related to this paper. **CWCK** has received research support from the Advanced Foods and Material Network, Agrifoods and Agriculture Canada, the Almond Board of California, the American Pistachio Growers, Barilla, the California Strawberry Commission, the Calorie Control Council, CIHR, the Canola Council of Canada, the Coca-Cola Company (investigator initiated, unrestricted grant), Hain Celestial, the International Tree Nut Council Nutrition Research and Education Foundation, Kellogg, Kraft, Loblaw Companies Ltd., Orafiti, Pulse Canada, Saskatchewan Pulse Growers, Solae and Unilever. He has received travel funding, consultant fees and/or honoraria from Abbott Laboratories, the Almond Board of California, the American Peanut Council, the American Pistachio Growers, Barilla, Bayer, the Canola Council of Canada, the Coca-Cola Company, Danone, General Mills, the International Tree Nut Council Nutrition Research and Education Foundation, Kellogg, Loblaw Companies Ltd., the Nutrition Foundation of Italy, Oldways Preservation Trust, Orafiti, Paramount Farms, the Peanut Institute, PepsiCo, Pulse Canada, Sabra Dipping Co., Saskatchewan Pulse Growers, Solae, Sun-Maid, Tate and Lyle, and Unilever. He is on the Dietary Guidelines Committee for the Diabetes Nutrition Study Group of the European Association for the Study of Diabetes and has served on the scientific advisory board for the Almond Board of California, the International Tree Nut Council, Oldways Preservation Trust, Paramount Farms and Pulse Canada. **VH** has received research support from the CIHR and the World Health Organization (WHO) for work on a systematic review and meta-analysis commissioned by WHO of the relation of saturated fatty acids with health outcomes. She received a travel award to attend a science day hosted by PepsiCo Inc. and the New York Academy of Sciences. **LC** has received research support from the CIHR and the Agricultural Bioproducts Innovation Program through the Pulse Research Network (PURENet), and Saskatchewan

Formatted: Font: Bold

Formatted: Font: Bold

1  
2  
3  
4  
5  
6  
7 629 Pulse Growers. She is also a casual clinical research coordinator at Glycemic Index  
8 Laboratories. **RJdS** is funded by a CIHR Postdoctoral Fellowship Award and has received  
9 research support from the CIHR, the Calorie Control Council, the Canadian Foundation for  
10 631 Dietetic Research and the Coca-Cola Company (investigator initiated, unrestricted grant). He  
11 632 has served as an external resource person to WHO's Nutrition Guidelines Advisory Group  
12 633 and received travel support from WHO to attend group meetings. He is the lead author of 2  
13 634 systematic reviews and meta-analyses commissioned by WHO of the relation of saturated  
14 635 fatty acids and trans fatty acids with health outcomes. **DJAJ** has received research grants  
15 636 from Saskatchewan Pulse Growers, the Agricultural Bioproducts Innovation Program  
16 637 through the Pulse Research Network, the Advanced Foods and Material Network, Loblaw  
17 638 Companies Ltd., Unilever, Barilla, the Almond Board of California, the Coca-Cola Company  
18 639 (investigator initiated, unrestricted grant), Solae, Haine Celestial, the Sanitarium Company,  
19 640 Orafti, the International Tree Nut Council Nutrition Research and Education Foundation, the  
20 641 Peanut Institute, the Canola and Flax Councils of Canada, the Calorie Control Council, the  
21 642 CIHR, the Canada Foundation for Innovation and the Ontario Research Fund. He has been  
22 643 on the speaker's panel, served on the scientific advisory board, and/or received travel  
23 644 support and/or honoraria from the Almond Board of California, Canadian Agriculture Policy  
24 645 Institute, Loblaw Companies Ltd, the Griffin Hospital (for the development of the NuVal  
25 646 scoring system), the Coca-Cola Company, Saskatchewan Pulse Growers, Sanitarium  
26 647 Company, Orafti, the Almond Board of California, the American Peanut Council, the  
27 648 International Tree Nut Council Nutrition Research and Education Foundation, the Peanut  
28 649 Institute, Herbalife International, Pacific Health Laboratories, Nutritional Fundamental for  
29 650 Health, Barilla, Metagenics, Bayer Consumer Care, Unilever Canada and Netherlands,  
30 651 Solae, Kellogg, Quaker Oats, Procter & Gamble, the Coca-Cola Company, the Griffin  
31 652 Hospital, Abbott Laboratories, the Canola Council of Canada, Dean Foods, the California  
32 653 Strawberry Commission, Haine Celestial, PepsiCo, the Alpro Foundation, Pioneer Hi- Bred  
33 654 International, DuPont Nutrition and Health, Spherix Consulting and WhiteWave Foods, the  
34 655 Advanced Foods and Material Network, the Canola and Flax Councils of Canada, the  
35 656

Formatted: Font: Bold

Formatted: Font: Bold

1  
2  
3  
4  
5  
6  
7 657 [Nutritional Fundamentals for Health, Agri-Culture and Agri-Food Canada, the Canadian Agri-](#)  
8 658 [Food Policy Institute, Pulse Canada, the Saskatchewan Pulse Growers, the Soy Foods](#)  
9 659 [Association of North America, the Nutrition Foundation of Italy \(NFI\), Nutra- Source](#)  
10 660 [Diagnostics, the McDougall Program, the Toronto Knowledge Translation Group \(St.](#)  
11 661 [Michael's Hospital\), the Canadian College of Naturopathic Medicine, The Hospital for Sick](#)  
12 662 [Children, the Canadian Nutrition Society \(CNS\), the American Society of Nutrition \(ASN\),](#)  
13 663 [Arizona State University, Paolo Sorbini Foundation and the Institute of Nutrition, Metabolism](#)  
14 664 [and Diabetes. He received an honorarium from the US Department of Agriculture to present](#)  
15 665 [the 2013 W.O. Atwater Memorial Lecture. He received the 2013 Award for Excellence in](#)  
16 666 [Research from the International Nut and Dried Fruit Council. He received funding and travel](#)  
17 667 [support from the Canadian Society of Endocrinology and Metabolism to produce mini cases](#)  
18 668 [for the Canadian Diabetes Association. His wife is a director and partner of Glycemic Index](#)  
19 669 [Laboratories, and his sister received funding through a grant from the St. Michael's Hospital](#)  
20 670 [Foundation to develop a cookbook for one of his studies. \*\*JLS\*\* has received research support](#)  
21 671 [from the CIHR, Calorie Control Council, the Coca-Cola Company \(investigator initiated,](#)  
22 672 [unrestricted grant\), Pulse Canada, and the International Tree Nut Council Nutrition Research](#)  
23 673 [and Education Foundation. He has received travel funding, speaker fees, and/or honoraria](#)  
24 674 [from the American Heart Association, the American Society for Nutrition, the National](#)  
25 675 [Institute of Diabetes and Digestive and Kidney Diseases, the Canadian Diabetes](#)  
26 676 [Association, the Canadian Nutrition Society, the Calorie Control Council, the Diabetes and](#)  
27 677 [Nutrition Study Group of the European Association for the Study of Diabetes, the](#)  
28 678 [International Life Sciences Institute North America, the International Life Sciences Institute](#)  
29 679 [Brazil, the University of South Carolina, the University of Alabama at Birmingham, the](#)  
30 680 [Canadian Sugar Institute, Oldways Preservation Trust, the Nutrition Foundation of Italy,](#)  
31 681 [Abbott Laboratories, Pulse Canada, Dr. Pepper Snapple Group, Corn Refiners Association,](#)  
32 682 [and the Coca-Cola Company. He is on the Clinical Practice Guidelines Expert Committee for](#)  
33 683 [Nutrition Therapy of both the Canadian Diabetes Association and the European Association](#)  
34 684 [for the Study of Diabetes, and he is on the American Society for Nutrition writing panel for a](#)

Formatted: Font: Bold



1  
2  
3  
4  
5  
6  
7 685 ~~scientific statement on the metabolic and nutritional effects of fructose, sucrose and high-~~  
8 686 ~~fructose corn syrup. He is a member of the Carbohydrate Quality Consortium and an unpaid~~  
9  
10 687 ~~scientific advisor for the Food, Nutrition and Safety Program of the International Life Science~~  
11 688 ~~Institute North America. His wife is an employee of Unilever Canada, has received consultant~~  
12  
13 689 ~~fees, honoraria, travel funding, or research support from or served on the scientific advisory~~  
14  
15 690 ~~board for the CIHR, Calorie Control Council, The Coca Cola Company (investigator initiated,~~  
16  
17 691 ~~unrestricted), Abbott Laboratories, Advanced Food Materials Network, Almond Board of~~  
18  
19 692 ~~California, American Peanut Council, American Pistachio Growers, Barilla, California~~  
20  
21 693 ~~Strawberry Commission, Canola Council of Canada, Danone, General Mills, Hain Celestial,~~  
22  
23 694 ~~International Tree Nut Council, Kellogg, Loblaw Brands Ltd, Oldways, Orafiti, Paramount~~  
24  
25 695 ~~Farms, Pulse Canada, Saskatchewan Pulse Growers, Solae and Unilever. **VH, AM, LC** have~~  
26 696 ~~received research support from the Canadian Institutes of Health Research (CIHR). **RJdS**~~  
27  
28 697 ~~has received research support from the Canadian Institutes of Health Research (CIHR),~~  
29  
30 698 ~~Calorie Control Council, and The Coca Cola Company (investigator initiated, unrestricted).~~  
31  
32 699 ~~He has served as an external resource person to the World Health Organization's (WHO)~~  
33  
34 700 ~~Nutrition Guidelines Advisory Group (NUGAG), and was the lead author of systematic~~  
35  
36 701 ~~reviews and meta-analysis commissioned by the WHO of saturated and trans fatty acids and~~  
37  
38 702 ~~health outcomes. The WHO paid for his travel and accommodation to attend the 5th~~  
39  
40 703 ~~NUGAG Meeting in Hangzhou, China (4-7 Mar, 2013), and the 6<sup>th</sup> NUGAG Meeting in~~  
41  
42 704 ~~Copenhagen, Denmark (21-24 Oct, 2013). **DJAJ** has received consultant fees, honoraria,~~  
43  
44 705 ~~travel funding, or research support from or served on the scientific advisory board for~~  
45  
46 706 ~~the CIHR, Canadian Foundation for Innovation (CFI), Ontario Research Fund (ORF), and~~  
47  
48 707 ~~Advanced Foods and Material Network (AFMNet) Calorie Control Council, The Coca Cola~~  
49  
50 708 ~~Company (investigator initiated, unrestricted), Barilla, Solae, Unilever, Hain Celestial,~~  
51  
52 709 ~~Loblaws Supermarkets, Inc., Sanitarium Company, Herbalife International, Pacific Health~~  
53  
54 710 ~~Laboratories, Inc., Metagenics/MetaProteomics, Bayer Consumer Care, Oldways~~  
55  
56 711 ~~Preservation Trust, The International Tree Nut Council Nutrition Research & Education, The~~  
57  
58 712 ~~Peanut Institute, Procter and Gamble Technical Centre Limited, Griffin Hospital for the~~

Blanco Mejia et al./TreeNuts and Metabolic Syndrome/BMJ/Page | 26

1  
2  
3  
4  
5  
6  
7 713 ~~development of the NuVal System, Soy Advisory Board of Dean Foods, Alpro Soy~~  
8 714 ~~Foundation, Nutritional Fundamentals for Health, Pacific Health Laboratories, Kellogg's,~~  
9  
10 715 ~~Quaker Oats, The Coca-Cola Sugar Advisory Board, Pepsi Company, Agrifoods and~~  
11  
12 716 ~~Agriculture Canada (AAFC), Canadian Agriculture Policy Institute (CABI), The Almond Board~~  
13  
14 717 ~~of California, The California Strawberry Commission, Orafiti, the Canola and Flax Councils of~~  
15  
16 718 ~~Canada, Pulse Canada, the Saskatchewan Pulse Growers, and Abbott Laboratories. JLS~~  
17  
18 719 ~~has received research support from the Canadian Institutes of Health Research (CIHR),~~  
19  
20 720 ~~Calorie Control Council, The Coca-Cola Company (investigator initiated, unrestricted grant),~~  
21  
22 721 ~~Pulse Canada, and The International Tree Nut Council Nutrition Research & Education~~  
23  
24 722 ~~Foundation. He has received travel funding, speaker fees, and/or honoraria from the~~  
25  
26 723 ~~American Heart Association (AHA), American College of Physicians (ACP), American~~  
27  
28 724 ~~Society for Nutrition (ASN), National Institute of Diabetes and Digestive and Kidney~~  
29  
30 725 ~~Diseases (NIDDK) of the National Institutes of Health (NIH), Canadian Diabetes Association~~  
31  
32 726 ~~(CDA), Canadian Nutrition Society (CNS), Calorie Control Council, Diabetes and Nutrition~~  
33  
34 727 ~~Study Group (DNSG) of the European Association for the Study of Diabetes (EASD),~~  
35  
36 728 ~~International Life Sciences Institute (ILSI) North America, International Life Sciences Institute~~  
37  
38 729 ~~(ILSI) Brazil, Abbott Laboratories, Pulse Canada, Dr. Pepper Snapple Group, and The Coca-~~  
39  
40 730 ~~Gola Company. He is on the Clinical Practice Guidelines Expert Committee for Nutrition~~  
41  
42 731 ~~Therapy of both the Canadian Diabetes Association (CDA) and European Association for the~~  
43  
44 732 ~~study of Diabetes (EASD), as well as being on the American Society for Nutrition (ASN)~~  
45  
46 733 ~~writing panel for a scientific statement on the metabolic and nutritional effects of fructose,~~  
47  
48 734 ~~sucrose and high fructose corn syrup. He is an unpaid scientific advisor for the International~~  
49  
50 735 ~~Life Science Institute (ILSI) North America, Food, Nutrition, and Safety Program (FNSP).~~  
51  
52 736 ~~His wife is an employee of Unilever Canada.~~

737

**Data Sharing**738  
739 No additional data available.

## REFERENCES

1. US Food and Drug Administration. Qualified Health Claims: Letter of Enforcement Discretion - Nuts and Coronary Heart Disease (Docket No 02P-0505), 2003.
2. U.S. Department of Agriculture and U.S. Department of Health and Human Services. Dietary Guidelines for Americans. 7th Edition ed. Washington, DC: US Government Printing Office, 2010.
3. American Heart Association Nutrition C, Lichtenstein AH, Appel LJ, Brands M, Carnethon M, Daniels S, et al. Diet and lifestyle recommendations revision 2006: a scientific statement from the American Heart Association Nutrition Committee. *Circulation* 2006;114(1):82-96.
4. McKelvie RS, Moe GW, Ezekowitz JA, Heckman GA, Costigan J, Ducharme A, et al. The 2012 Canadian Cardiovascular Society heart failure management guidelines update: focus on acute and chronic heart failure. *The Canadian journal of cardiology* 2013;29(2):168-81.
5. Estruch R, Martinez-Gonzalez MA, Corella D, Salas-Salvado J, Ruiz-Gutierrez V, Covas MI, et al. Effects of a Mediterranean-style diet on cardiovascular risk factors: a randomized trial. *Annals of internal medicine* 2006;145(1):1-11.
6. Estruch R, Ros E, Salas-Salvado J, Covas MI, Corella D, Aros F, et al. Primary prevention of cardiovascular disease with a Mediterranean diet. *The New England journal of medicine* 2013;368(14):1279-90.
7. Ibarrola-Jurado N, Bullo M, Guasch-Ferre M, Ros E, Martinez-Gonzalez MA, Corella D, et al. Cross-sectional assessment of nut consumption and obesity, metabolic syndrome and other cardiometabolic risk factors: the PREDIMED study. *PLoS One* 2013;8(2):e57367.
8. Wien MA, Sabate JM, Ikle DN, Cole SE, Kandeel FR. Almonds vs complex carbohydrates in a weight reduction program. *Int J Obes Relat Metab Disord* 2003;27(11):1365-72.
9. Somers SM, Graham L, Markwell K. Isoenergetic replacement of dietary saturated with monounsaturated fat via macadamia nuts enhances endothelial function in overweight subjects: e-SPEN Journal, 2013.
10. Curb JD, Wergowske G, Dobbs JC, Abbott RD, Huang B. Serum lipid effects of a high-monounsaturated fat diet based on macadamia nuts. *Arch Intern Med* 2000;160(8):1154-8.
11. Li Z, Song R, Nguyen C, Zerlin A, Karp H, Naowamondhol K, et al. Pistachio nuts reduce triglycerides and body weight by comparison to refined carbohydrate snack in obese subjects on a 12-week weight loss program. *Journal of the American College of Nutrition* 2010;29(3):198-203.
12. Torabian S, Haddad E, Cordero-MacIntyre Z, Tanzman J, Fernandez ML, Sabate J. Long-term walnut supplementation without dietary advice induces favorable serum lipid changes in free-living individuals. *European journal of clinical nutrition* 2010;64(3):274-9.
13. Chisholm A, Mann J, Skeaff M, Frampton C, Sutherland W, Duncan A, et al. A diet rich in walnuts favourably influences plasma fatty acid profile in moderately hyperlipidaemic subjects. *European journal of clinical nutrition* 1998;52(1):12-6.

Field Code Changed

Formatted: English (Canada)

Formatted: Spanish (Mexico)

Formatted: English (Canada)

Formatted: Spanish (Mexico)

Formatted: English (Canada)

Formatted: Italian (Italy)

Formatted: English (Canada)

14. Rajaram S, Burke K, Connell B, Myint T, Sabate J. A monounsaturated fatty acid-rich pecan-enriched diet favorably alters the serum lipid profile of healthy men and women. *The Journal of nutrition* 2001;131(9):2275-9.
15. Jenkins DJ, Kendall CW, Marchie A, Parker TL, Connelly PW, Qian W, et al. Dose response of almonds on coronary heart disease risk factors: blood lipids, oxidized low-density lipoproteins, lipoprotein(a), homocysteine, and pulmonary nitric oxide: a randomized, controlled, crossover trial. *Circulation* 2002;106(11):1327-32.
16. Kocyigit A, Koylu AA, Keles H. Effects of pistachio nuts consumption on plasma lipid profile and oxidative status in healthy volunteers. *Nutrition, metabolism, and cardiovascular diseases : NMCD* 2006;16(3):202-9.
17. Sheridan MJ, Cooper JN, Erario M, Cheifetz CE. Pistachio nut consumption and serum lipid levels. *Journal of the American College of Nutrition* 2007;26(2):141-8.
18. Darvish Damavandi R. The Effects of Cashew Consumption on Serum Glucose, Insulin and Lipoprotein in Type 2 Diabetic Patients. *Iranian Journal of Endocrinology and Metabolism* 2012;14(4):325-34.
19. Cohen AE, Johnston CS. Almond ingestion at mealtime reduces postprandial glycemia and chronic ingestion reduces hemoglobin A(1c) in individuals with well-controlled type 2 diabetes mellitus. *Metabolism: clinical and experimental* 2011;60(9):1312-7.
20. Jenkins DJ, Kendall CW, Banach MS, Srichaikul K, Vidgen E, Mitchell S, et al. Nuts as a replacement for carbohydrates in the diabetic diet. *Diabetes care* 2011;34(8):1706-11.
21. Li SC, Liu YH, Liu JF, Chang WH, Chen CM, Chen CY. Almond consumption improved glycemic control and lipid profiles in patients with type 2 diabetes mellitus. *Metabolism: clinical and experimental* 2011;60(4):474-9.
22. Wang X, Li Z, Liu Y, Lv X, Yang W. Effects of pistachios on body weight in Chinese subjects with metabolic syndrome. *Nutr J* 2012;11:20.
23. Dworatzek PD, Arcudi K, Gougeon R, Husein N, Sievenpiper JL, Williams SL. Clinical Practice Guidelines Nutrition Therapy. *Can J Diabetes* 2013;37(Supplement 1):S45-S55.
24. Higgins JP, G, Sally. Cochrane Handbook for Systematic Reviews of Interventions. In: collaboration TC, editor, 2011.
25. Graf C, Battisti WP, Bridges D, Bruce-Winkler V, Conaty JM, Ellison JM, et al. Research Methods & Reporting. Good publication practice for communicating company sponsored medical research: the GPP2 guidelines. *Bmj* 2009;339:b4330.
26. US Food and Drug Administration. Guidance for Industry: Evidence-Based Review System for the Scientific Evaluation of Health Claims - Final, 2009.
27. Alberti KG, Eckel RH, Grundy SM, Zimmet PZ, Cleeman JI, Donato KA, et al. Harmonizing the metabolic syndrome: a joint interim statement of the International Diabetes Federation Task Force on Epidemiology and Prevention; National Heart, Lung, and Blood Institute; American Heart Association; World Heart Federation; International Atherosclerosis Society; and International Association for the Study of Obesity. *Circulation* 2009;120(16):1640-5.

28. Heyland DK, Novak F, Drover JW, Jain M, Su X, Suchner U. Should immunonutrition become routine in critically ill patients? A systematic review of the evidence. *JAMA : the journal of the American Medical Association* 2001;286(8):944-53.
29. Elbourne DR, Altman DG, Higgins JP, Curtin F, Worthington HV, Vail A. Meta-analyses involving cross-over trials: methodological issues. *International journal of epidemiology* 2002;31(1):140-9.
30. Sabate J, Fraser GE, Burke K, Knutsen SF, Bennett H, Lindsted KD. Effects of walnuts on serum lipid levels and blood pressure in normal men. *The New England journal of medicine* 1993;328(9):603-7.
31. Spiller GA, Jenkins DA, Bosello O, Gates JE, Cragen LN, Bruce B. Nuts and plasma lipids: an almond-based diet lowers LDL-C while preserving HDL-C. *Journal of the American College of Nutrition* 1998;17(3):285-90.
32. Morgan WA, Clayshulte BJ. Pecans lower low-density lipoprotein cholesterol in people with normal lipid levels. *J Am Diet Assoc* 2000;100(3):312-8.
33. Zambon D, Sabate J, Munoz S, Campero B, Casals E, Merlos M, et al. Substituting walnuts for monounsaturated fat improves the serum lipid profile of hypercholesterolemic men and women. A randomized crossover trial. *Annals of internal medicine* 2000;132(7):538-46.
34. Iwamoto M, Imaizumi K, Sato M, Hirooka Y, Sakai K, Takeshita A, et al. Serum lipid profiles in Japanese women and men during consumption of walnuts. *European journal of clinical nutrition* 2002;56(7):629-37.
35. Lovejoy JC, Most MM, Lefevre M, Greenway FL, Rood JC. Effect of diets enriched in almonds on insulin action and serum lipids in adults with normal glucose tolerance or type 2 diabetes. *The American journal of clinical nutrition* 2002;76(5):1000-6.
36. Sabate J, Haddad E, Tanzman JS, Jambazian P, Rajaram S. Serum lipid response to the graduated enrichment of a Step I diet with almonds: a randomized feeding trial. *The American journal of clinical nutrition* 2003;77(6):1379-84.
37. Tapsell LC, Gillen LJ, Patch CS, Batterham M, Owen A, Bare M, et al. Including walnuts in a low-fat/modified-fat diet improves HDL cholesterol-to-total cholesterol ratios in patients with type 2 diabetes. *Diabetes care* 2004;27(12):2777-83.
38. Tamizifar B, Rismankarzadeh, M., Vosoughi, A., Pharm, M., Tamizifar B, Aminzade, A. A low-dose almond-based diet decreases LDL-C while preserving HDL-C. *Archives of Iranian Medicine* 2005;8(1):45-51.
39. Kurlandsky SBaS, Kim S. Cardioprotective effects of chocolate and almond consumption in healthy women. *Nutrition Research* 2006;26:509-16.
40. Mukuddem-Petersen J, Stonehouse Oosthuizen W, Jerling JC, Hanekom SM, White Z. Effects of a high walnut and high cashew nut diet on selected markers of the metabolic syndrome: a controlled feeding trial. *The British journal of nutrition* 2007;97(6):1144-53.
41. Gebauer SK, West SG, Kay CD, Alaupovic P, Bagshaw D, Kris-Etherton PM. Effects of pistachios on cardiovascular disease risk factors and potential mechanisms of action: a dose-response study. *The American journal of clinical nutrition* 2008;88(3):651-9.

42. Griel AE, Cao Y, Bagshaw DD, Cifelli AM, Holub B, Kris-Etherton PM. A macadamia nut-rich diet reduces total and LDL-cholesterol in mildly hypercholesterolemic men and women. *The Journal of nutrition* 2008;138(4):761-7.
43. Rajaram S, Haddad EH, Mejia A, Sabate J. Walnuts and fatty fish influence different serum lipid fractions in normal to mildly hyperlipidemic individuals: a randomized controlled study. *The American journal of clinical nutrition* 2009;89(5):1657S-63S.
44. Tapsell LC, Batterham MJ, Teuss G, Tan SY, Dalton S, Quick CJ, et al. Long-term effects of increased dietary polyunsaturated fat from walnuts on metabolic parameters in type II diabetes. *European journal of clinical nutrition* 2009;63(8):1008-15.
45. Ma Y, Njike VY, Millet J, Dutta S, Doughty K, Treu JA, et al. Effects of walnut consumption on endothelial function in type 2 diabetic subjects: a randomized controlled crossover trial. *Diabetes care* 2010;33(2):227-32.
46. Wien M, Bleich D, Raghuvanshi M, Gould-Forgerite S, Gomes J, Monahan-Couch L, et al. Almond consumption and cardiovascular risk factors in adults with prediabetes. *Journal of the American College of Nutrition* 2010;29(3):189-97.
47. Wu H, Pan A, Yu Z, Qi Q, Lu L, Zhang G, et al. Lifestyle counseling and supplementation with flaxseed or walnuts influence the management of metabolic syndrome. *The Journal of nutrition* 2010;140(11):1937-42.
48. Casas-Agustench P, Lopez-Uriarte P, Bullo M, Ros E, Cabre-Vila JJ, Salas-Salvado J. Effects of one serving of mixed nuts on serum lipids, insulin resistance and inflammatory markers in patients with the metabolic syndrome. *Nutrition, metabolism, and cardiovascular diseases : NMCD* 2011;21(2):126-35.
49. Tey SL, Brown R, Gray A, Chisholm A, Delahunty C. Nuts improve diet quality compared to other energy-dense snacks while maintaining body weight. *J Nutr Metab* 2011;2011:357350.
50. Foster GD, Shantz KL, Vander Veur SS, Oliver TL, Lent MR, Virus A, et al. A randomized trial of the effects of an almond-enriched, hypocaloric diet in the treatment of obesity. *The American journal of clinical nutrition* 2012;96(2):249-54.
51. Katz DL, Davidhi A, Ma Y, Kavak Y, Bifulco L, Njike VY. Effects of walnuts on endothelial function in overweight adults with visceral obesity: a randomized, controlled, crossover trial. *Journal of the American College of Nutrition* 2012;31(6):415-23.
52. Anderson ADA, M. M. Jacobson, J. L. Popko, M. R. Young, J. R. Limburg, P. J. Wilson, T. Metabolic effects of bedtime pistachio consumption for 6 weeks in overweight persons. *FASEB* 2013;27.
53. Berryman CEW, S. G. Bordi, P. L. Fleming, J. A. Kris-Etherton, P. M. . Daily inclusion of almonds (1.5 ounces) in a cholesterol-lowering diet maintains HDL-cholesterol and HDL subclasses in mildly hypercholesterolemic adults. *Annals of Nutrition and Metabolism* 2013;63:1338.
54. Damavandi RD, Egtesadi S, Shidfar F, Heydari I, Foroushani AR. Effects of hazelnuts consumption on fasting blood sugar and lipoproteins in patients with type 2 diabetes. *Journal of research in medical sciences : the official journal of Isfahan University of Medical Sciences* 2013;18(4):314-21.



- 1  
2  
3  
4  
5  
6  
7  
8  
9  
10  
11  
12  
13  
14  
15  
16  
17  
18  
19  
20  
21  
22  
23  
24  
25  
26  
27  
28  
29  
30  
31  
32  
33  
34  
35  
36  
37  
38  
39  
40  
41  
42  
43  
44  
45  
46  
47  
48  
49  
50  
51  
52  
53  
54  
55  
56  
57  
58  
59  
60
55. Sauder KAM, C. E. Kris-Etherton, P. M. Ulbrecht, J. S. West, S. G. . Effect of pistachios on lipids, lipoproteins, glucose metabolism, and insulin sensitivity in type 2 diabetes. *FASEB* 2013;27.
56. Tan SY, Mattes RD. Appetitive, dietary and health effects of almonds consumed with meals or as snacks: a randomized, controlled trial. *European journal of clinical nutrition* 2013;67(11):1205-14.
57. Tey SL, Gray AR, Chisholm AW, Delahunty CM, Brown RC. The dose of hazelnuts influences acceptance and diet quality but not inflammatory markers and body composition in overweight and obese individuals. *The Journal of nutrition* 2013;143(8):1254-62.
58. Gulati S, Misra A, Pandey RM, Bhatt SP, Saluja S. Effects of pistachio nuts on body composition, metabolic, inflammatory and oxidative stress parameters in Asian Indians with metabolic syndrome: a 24-wk, randomized control trial. *Nutrition* 2014;30(2):192-7.
59. Wu L, Piotrowski K, Rau T, Waldmann E, Broedl UC, Demmelmair H, et al. Walnut-enriched diet reduces fasting non-HDL-cholesterol and apolipoprotein B in healthy Caucasian subjects: a randomized controlled cross-over clinical trial. *Metabolism: clinical and experimental* 2014;63(3):382-91.
60. Schutte AE, Van Rooyen JM, Huisman HW, Mukuddem-Petersen J, Oosthuizen W, Hanekom SM, et al. Modulation of baroreflex sensitivity by walnuts versus cashew nuts in subjects with metabolic syndrome. *American journal of hypertension* 2006;19(6):629-36.
61. Jenkins DJ, Kendall CW, Marchie A, Josse AR, Nguyen TH, Faulkner DA, et al. Almonds reduce biomarkers of lipid peroxidation in older hyperlipidemic subjects. *The Journal of nutrition* 2008;138(5):908-13.
62. West SG, Gebauer SK, Kay CD, Bagshaw DM, Savastano DM, Diefenbach C, et al. Diets containing pistachios reduce systolic blood pressure and peripheral vascular responses to stress in adults with dyslipidemia. *Hypertension* 2012;60(1):58-63.
63. Holligan SW, S. G. Gebauer, S. K. Kay, C. D. Kris-Etherton, P. M. A moderate-fat diet with pistachios lowers small-dense LDL and improves markers of insulin sensitivity in subjects with moderately-elevated cholesterol levels. *FASEB* 2013;27.
64. Sabate J, Oda K, Ros E. Nut consumption and blood lipid levels: a pooled analysis of 25 intervention trials. *Arch Intern Med* 2010;170(9):821-7.
65. Esposito K, Maiorino MI, Ciotola M, Di Palo C, Scognamiglio P, Gicchino M, et al. Effects of a Mediterranean-style diet on the need for antihyperglycemic drug therapy in patients with newly diagnosed type 2 diabetes: a randomized trial. *Annals of internal medicine* 2009;151(5):306-14.
66. Esposito K, Maiorino MI, Ceriello A, Giugliano D. Prevention and control of type 2 diabetes by Mediterranean diet: a systematic review. *Diabetes research and clinical practice* 2010;89(2):97-102.
67. Kris-Etherton PM, Hu FB, Ros E, Sabate J. The role of tree nuts and peanuts in the prevention of coronary heart disease: multiple potential mechanisms. *The Journal of nutrition* 2008;138(9):1746S-51S.

Formatted: Italian (Italy)

Formatted: English (Canada)



- 1  
2  
3  
4  
5  
6  
7  
8  
9  
10  
11  
12  
13  
14  
15  
16  
17  
18  
19  
20  
21  
22  
23  
24  
25  
26  
27  
28  
29  
30  
31  
32  
33  
34  
35  
36  
37  
38  
39  
40  
41  
42  
43  
44  
45  
46  
47  
48  
49  
50  
51  
52  
53  
54  
55  
56  
57  
58  
59  
60
68. Shai I, Schwarzfuchs D, Henkin Y, Shahar DR, Witkow S, Greenberg I, et al. Weight loss with a low-carbohydrate, Mediterranean, or low-fat diet. *The New England journal of medicine* 2008;359(3):229-41.
  69. Azadbakht L, Fard NR, Karimi M, Baghaei MH, Surkan PJ, Rahimi M, et al. Effects of the Dietary Approaches to Stop Hypertension (DASH) eating plan on cardiovascular risks among type 2 diabetic patients: a randomized crossover clinical trial. *Diabetes care* 2011;34(1):55-7.
  70. Sievenpiper JL, Dworatzek PD. Food and Dietary Pattern-Based Recommendations: An Emerging Approach to Clinical Practice Guidelines for Nutrition Therapy in Diabetes. *Canadian Journal of Diabetes* 2013;37:51-57.
  71. Josse AR, Kendall CW, Augustin LS, Ellis PR, Jenkins DJ. Almonds and postprandial glycemia--a dose-response study. *Metabolism: clinical and experimental* 2007;56(3):400-4.
  72. Mozaffarian D, Capewell S. United Nations' dietary policies to prevent cardiovascular disease. *Bmj* 2011;343:d5747.
  73. Jenkins DJ, Jones PJ, Lamarche B, Kendall CW, Faulkner D, Cermakova L, et al. Effect of a dietary portfolio of cholesterol-lowering foods given at 2 levels of intensity of dietary advice on serum lipids in hyperlipidemia: a randomized controlled trial. *JAMA : the journal of the American Medical Association* 2011;306(8):831-9.
  74. Sabate J, Cordero-Macintyre Z, Siapco G, Torabian S, Haddad E. Does regular walnut consumption lead to weight gain? *The British journal of nutrition* 2005;94(5):859-64.
  75. Almario RU, Vonghavaravat V, Wong R, Kasim-Karakas SE. Effects of walnut consumption on plasma fatty acids and lipoproteins in combined hyperlipidemia. *The American journal of clinical nutrition* 2001;74(1):72-9.
  76. Jenkins DJ, Kendall CW, Popovich DG, Vidgen E, Mehling CC, Vuksan V, et al. Effect of a very-high-fiber vegetable, fruit, and nut diet on serum lipids and colonic function. *Metabolism: clinical and experimental* 2001;50(4):494-503.
  77. Appel LJ, Moore TJ, Obarzanek E, Vollmer WM, Svetkey LP, Sacks FM, et al. A clinical trial of the effects of dietary patterns on blood pressure. DASH Collaborative Research Group. *The New England journal of medicine* 1997;336(16):1117-24.
  78. Sacks FM, Svetkey LP, Vollmer WM, Appel LJ, Bray GA, Harsha D, et al. Effects on blood pressure of reduced dietary sodium and the Dietary Approaches to Stop Hypertension (DASH) diet. DASH-Sodium Collaborative Research Group. *The New England journal of medicine* 2001;344(1):3-10.
  79. Begg C, Cho M, Eastwood S, Horton R, Moher D, Olkin I, et al. Improving the quality of reporting of randomized controlled trials. The CONSORT statement. *JAMA : the journal of the American Medical Association* 1996;276(8):637-9.
  80. Barnard ND, Cohen J, Jenkins DJ, Turner-McGrievy G, Gloede L, Green A, et al. A low-fat vegan diet and a conventional diabetes diet in the treatment of type 2 diabetes: a randomized, controlled, 74-wk clinical trial. *The American journal of clinical nutrition* 2009;89(5):1588S-96S.

- 1  
2  
3  
4  
5  
6  
7  
8  
9  
10  
11  
12  
13  
14  
15  
16  
17  
18  
19  
20  
21  
22  
23  
24  
25  
26  
27  
28  
29  
30  
31  
32  
33  
34  
35  
36  
37  
38  
39  
40  
41  
42  
43  
44  
45  
46  
47  
48  
49  
50  
51  
52  
53  
54  
55  
56  
57  
58  
59  
60
81. Rizzo NS, Sabate J, Jaceldo-Siegl K, Fraser GE. Vegetarian dietary patterns are associated with a lower risk of metabolic syndrome: the adventist health study 2. *Diabetes care* 2011;34(5):1225-7.
82. Jenkins DJ, Kendall CW, Marchie A, Faulkner D, Vidgen E, Lapsley KG, et al. The effect of combining plant sterols, soy protein, viscous fibers, and almonds in treating hypercholesterolemia. *Metabolism: clinical and experimental* 2003;52(11):1478-83.
83. Jenkins DJ, Kendall CW, Marchie A, Faulkner DA, Wong JM, de Souza R, et al. Direct comparison of a dietary portfolio of cholesterol-lowering foods with a statin in hypercholesterolemic participants. *The American journal of clinical nutrition* 2005;81(2):380-7.

35

Table 1

Formatted: Left: 0.5", Right: 1", Top: 0.66", Bottom: 0.79", Width: 8.5", Height: 11", Header distance from edge: 0.49", Footer distance from edge: 0.49"

| Study, year (Reference)            | Participants                                                             | Mean Age (SD or range), y | Mean Body Weight or BMI (SD or range)§                 | Setting                                              | Design           | Feeding Control | Nut type | Nuts Dose (g/day)¶ | Comparator | Diet ††                                            | En Bal                                       |            |          |   |                 |
|------------------------------------|--------------------------------------------------------------------------|---------------------------|--------------------------------------------------------|------------------------------------------------------|------------------|-----------------|----------|--------------------|------------|----------------------------------------------------|----------------------------------------------|------------|----------|---|-----------------|
| Sabate et al, 1993 (30)            | Walnut Control                                                           | 18 (18 M)                 | 30                                                     | 73                                                   | OP, USA          | Crossover       | Met      | Walnut             | 84         | NCEP Step 1 diet                                   | 55:31:14<br>56:30:14                         | Isocaloric | 4 wks    | 6 | Agency          |
| Chisholm et al, 1998 (13)          | Walnut Control                                                           | 16 HLP                    | 45 (6.8)                                               | 28.4 (4.3)                                           | OP, New Zealand  | Crossover       | DA       | Walnut             | 78         | Low Fat Diet                                       | 40:38:17<br>46:30:19                         | Isocaloric | 4 wks    | 4 | Agency          |
| Spiller et al, 1998 (31)           | Almond Control                                                           | 30 HLP                    | 53 (10)                                                | 66 (13)                                              | OP, Italy        | Parallel        | Supp     | Almond             | 100        | Matched macronutrient diet                         | 45:39:16<br>47:36:17                         | Isocaloric | 4 wks    | 6 | Agency          |
| Curb et al, 2000 (10)              | Macadamia Control                                                        | 30 (15 M, 15 W)           | 35.25 (18-53)                                          | 23 (19.1 - 28.3)                                     | OP, USA          | Crossover       | Met      | Macadamia          | 46         | AHA AAD                                            | 48:35:17<br>54:30:16<br>48:35:17             | Isocaloric | 4 wks    | 4 | Agency-Industry |
| Morgan et al, 2000 (32)            | Pecan Control                                                            | 19 (4 M, 15 W)            | 37 (12)<br>45(10)                                      | 24 (5)<br>24 (4)                                     | OP, USA          | Parallel        | Supp     | Pecan              | 68         | Self-selected diet                                 | 45:43:12<br>46:36:18                         | Isocaloric | 8 wks    | 6 | Agency          |
| Zambon et al, 2000 (33)            | Walnut Control                                                           | 49 HC (26 M, 23 W)        | 56 (11)                                                | 70.6 (12.1)                                          | OP, Spain        | Crossover       | Supp     | Walnut             | 48.5       | Mediterranean diet                                 | 48:34:18<br>50:31:19                         | Isocaloric | 6 wks    | 6 | Agency          |
| Rajaram et al, 2001 (14)           | Pecan Control                                                            | 23 (14 M, 9 W)            | 25-55                                                  | 74.4 (16.7)                                          | OP, USA          | Crossover       | Met      | Pecan              | 72         | NCEP Step 1 diet                                   | 47:40:13<br>57:28:15                         | Isocaloric | 4 wks    | 8 | Agency          |
| Iwamoto et al, 2002 (34)           | Walnut Control                                                           | 40 (20 M, 20 W)           | 23.8 (3.1)‡<br>23.6 (4.6)‡                             | 22.2 (0.5)<br>20.7 (0.5)                             | OP, Japan        | Crossover       | Met      | Walnut             | 52¶        | Average Japanese Diet                              | 60:26:14<br>62:24:14                         | Isocaloric | 4 wks    | 8 | Agency          |
| Jenkins et al, 2002 (15)           | Almond Control                                                           | 27 HLP (15 M, 12 W)       | 64 (9)                                                 | 71.2 (2.5)<br>71.0 (2.4)                             | OP, Canada       | Crossover       | Supp     | Almond             | 73         | NCEP Step 2 diet + Muffin                          | 47:36:17<br>57:26:18                         | Isocaloric | 4 wks    | 6 | Agency          |
| Lovejoy et al, 2002 (35)           | High Fat Almond<br>Low Fat Almond<br>High Fat Control<br>Low Fat Control | 30 DM2 (13 M, 17 W)       | 53.8 (10.4)                                            | 33.0 (5.5)                                           | OP, USA          | Crossover       | Met      | Almond<br>Almond   | 85¶        | High Fat diet<br>Low Fat diet                      | 48:37:15<br>60:25:15<br>48:37:15<br>60:25:15 | Isocaloric | 4 wks    | 5 | Agency          |
| Sabate et al, 2003 (36)            | High-Almond<br>Low-Almond<br>Control                                     | 25 NL-HC (14 M, 11 W)     | 41 (13)                                                | N/A                                                  | OP, USA          | Crossover       | Met      | Almond<br>Almond   | 83<br>42   | NCEP Step 1 diet                                   | 46:39:14<br>35:51:14<br>56:30:14             | Isocaloric | 4 wks    | 5 | Agency-Industry |
| Wien et al, 2003 (8)               | Almond Control                                                           | 65 OW/DM2 (28 M, 37 W)    | 53 (2)<br>57 (2)                                       | 113 (5)<br>114 (5)                                   | OP, USA          | Parallel        | Supp     | Almond             | 84         | CHO-LCD                                            | 53:18:29<br>32:39:29                         | Isocaloric | 24 wks   | 8 | Agency          |
| Tapsell et al, 2004 (37)           | Walnut Control                                                           | 37 DM2                    | 57.7 (9)<br>59.3 (7.1)                                 | 87.6 (12.8)<br>81.9 (11.2)                           | OP, Australia    | Parallel        | Supp     | Walnut             | 30         | Modified Fat                                       | 44:32:22<br>41:33:23                         | Isocaloric | 6 months | 6 | Agency          |
| Tamizifar et al, 2005 (38)         | Almond Control                                                           | 30 HC (17 M, 13 W)        | 56 (6.1)                                               | 63 (8.9)                                             | OP, Iran         | Crossover       | Supp     | Almond             | 25         | NCEP Step 1 diet                                   | 47:37:17<br>45:29:15                         | Isocaloric | 4 wks    | 5 | N/A             |
| Kocyyigit et al, 2006 (16)         | Pistachio Control                                                        | 44 (24 M, 20 W)           | 32.8 (6.7)                                             | 24.2 (6.1)<br>24.6 (5.6)                             | OP, Turkey       | Parallel        | DA       | Pistachio          | 69         | Regular diet                                       | N/A                                          | Isocaloric | 3 wks    | 8 | Agency          |
| Kurilandsky et al, 2006 (39)       | Almond<br>Almond + Dark Chocolate<br>Dark chocolate<br>Control           | 47 (47 W)                 | 41.8 (11.7)<br>46.2 (7.8)<br>36.5 (11.9)<br>51.3 (6.3) | 25.3 (3.5)<br>27.2 (4.2)<br>23.9 (3.3)<br>26.1 (4.1) | OP, USA          | Parallel        | Supp     | Almond<br>Almond   | 60         | NCEP ATP III diet + Chocolate<br>NCEP ATP III diet | 51:34:15<br>46:39:15<br>55:30:15<br>57:27:16 | Isocaloric | 6 wks    | 5 | Agency-Industry |
| Schutte et al, 2006 (60)*          | Walnut<br>Cashew<br>Control                                              | 62 MetS                   | 45.5<br>45.7<br>44.4                                   | 35.9<br>34.7<br>35.5                                 | OP, South Africa | Parallel        | Met      | Walnut<br>Cashew   | 85.5       | Control diet                                       | 47:36:17<br>47:36:17<br>50:33:18             | Isocaloric | 8 wks    | 7 | Agency-Industry |
| Mukuddem-Petersen et al, 2007 (40) | Walnut<br>Cashew<br>Control                                              | 64 MetS                   | 45 (10)                                                | 107<br>99<br>106                                     | OP, South Africa | Parallel        | Met      | Walnut<br>Cashew   | 85.5¶      | Habitual diet                                      | 49:35:16<br>44:37:19<br>47:33:20             | Isocaloric | 8 wks    | 7 | Agency-Industry |
| Sheridan et al, 2007 (17)          | Pistachio Control                                                        | 15 HC                     | 60 (11.2)                                              | 175 (26)                                             | OP, USA          | Crossover       | Supp     | Pistachio          | 35         | Regular diet                                       | 52:31:17<br>53:31:16                         | Isocaloric | 4 wks    | 6 | Agency          |

| Study, year (Reference)            | Participants                                                             | Mean Age (SD or range), y | Mean Body Weight or BMI (SD or range) <sup>§</sup>     | Setting                                              | Design           | Feeding Control | Nut type | Nuts Dose (g/d) <sup>  </sup> | Comparator        | Diet <sup>††</sup>                                 | Energy Balance                               | Follow-Up  | MQS <sup>§§</sup> | Funding Sources <sup>   </sup> |                 |
|------------------------------------|--------------------------------------------------------------------------|---------------------------|--------------------------------------------------------|------------------------------------------------------|------------------|-----------------|----------|-------------------------------|-------------------|----------------------------------------------------|----------------------------------------------|------------|-------------------|--------------------------------|-----------------|
| Sabate et al, 1993 (32)            | Walnut Control                                                           | 18 (18 M)                 | 30                                                     | 73                                                   | OP, USA          | Crossover       | Met      | Walnut                        | 84                | NCEP Step 1 diet                                   | 55:31:14<br>56:30:14                         | Isocaloric | 4 wks             | 6                              | Agency          |
| Chisholm et al, 1998 (13)          | Walnut Control                                                           | 16 HLP                    | 45 (6.8)                                               | 28.4 (4.3)                                           | OP, New Zealand  | Crossover       | DA       | Walnut                        | 78                | Low Fat Diet                                       | 40:38:17<br>46:30:19                         | Isocaloric | 4 wks             | 4                              | Agency          |
| Spiller et al, 1998 (33)           | Almond Control                                                           | 30 HLP                    | 53 (10)                                                | 66 (13)                                              | OP, Italy        | Parallel        | Supp     | Almond                        | 100               | Matched macronutrient diet                         | 45:39:16<br>47:36:17                         | Isocaloric | 4 wks             | 6                              | Agency          |
| Curb et al, 2000 (10)              | Macadamia Control                                                        | 30 (15 M, 15 W)           | 35.25 (18-53)                                          | 23 (19.1 - 28.3)                                     | OP, USA          | Crossover       | Met      | Macadamia                     | 46                | AHA AAD                                            | 48:35:17<br>54:30:16<br>48:35:17             | Isocaloric | 4 wks             | 4                              | Agency-Industry |
| Morgan et al, 2000 (34)            | Pecan Control                                                            | 19 (4 M, 15 W)            | 37 (12)<br>45(10)                                      | 24 (5)<br>24 (4)                                     | OP, USA          | Parallel        | Supp     | Pecan                         | 68                | Self-selected diet                                 | 45:43:12<br>46:36:18                         | Isocaloric | 8 wks             | 6                              | Agency          |
| Zambon et al, 2000 (35)            | Walnut Control                                                           | 49 HC (26 M, 23 W)        | 56 (11)                                                | 70.6 (12.1)                                          | OP, Spain        | Crossover       | Supp     | Walnut                        | 48.5              | Mediterranean diet                                 | 48:34:18<br>50:31:19                         | Isocaloric | 6 wks             | 6                              | Agency          |
| Rajaram et al, 2001 (14)           | Pecan Control                                                            | 23 (14 M, 9 W)            | 25-55                                                  | 74.4 (16.7)                                          | OP, USA          | Crossover       | Met      | Pecan                         | 72                | NCEP Step 1 diet                                   | 47:40:13<br>57:28:15                         | Isocaloric | 4 wks             | 8                              | Agency          |
| Iwamoto et al, 2002 (36)           | Walnut Control                                                           | 40 (20 M, 20 W)           | 23.8 (3.1) <sup>‡</sup><br>23.6 (4.6) <sup>‡</sup>     | 22.2 (0.5)<br>20.7 (0.5)                             | OP, Japan        | Crossover       | Met      | Walnut                        | 52 <sup>¶</sup>   | Average Japanese Diet                              | 60:26:14<br>62:24:14                         | Isocaloric | 4 wks             | 8                              | Agency          |
| Jenkins et al, 2002 (15)           | Almond Control                                                           | 27 HLP (15 M, 12 W)       | 64 (9)                                                 | 71.2 (2.5)<br>71.0 (2.4)                             | OP, Canada       | Crossover       | Supp     | Almond                        | 73                | NCEP Step 2 diet + Muffin                          | 47:36:17<br>57:26:18                         | Isocaloric | 4 wks             | 6                              | Agency          |
| Lovejoy et al, 2002 (37)           | High Fat Almond<br>Low Fat Almond<br>High Fat Control<br>Low Fat Control | 30 DM2 (13 M, 17 W)       | 53.8 (10.4)                                            | 33.0 (5.5)                                           | OP, USA          | Crossover       | Met      | Almond<br>Almond              | 85 <sup>¶</sup>   | High Fat diet<br>Low Fat diet                      | 48:37:15<br>60:25:15<br>48:37:15<br>60:25:15 | Isocaloric | 4 wks             | 5                              | Agency          |
| Sabate et al, 2003 (38)            | High-Almond<br>Low-Almond<br>Control                                     | 25 NL-HC (14 M, 11 W)     | 41 (13)                                                | N/A                                                  | OP, USA          | Crossover       | Met      | Almond<br>Almond              | 83<br>42          | NCEP Step 1 diet                                   | 46:39:14<br>35:51:14<br>56:30:14             | Isocaloric | 4 wks             | 5                              | Agency-Industry |
| Wien et al, 2003 (8)               | Almond Control                                                           | 65 OW/DM2 (28 M, 37 W)    | 53 (2)<br>57 (2)                                       | 113 (5)<br>114 (5)                                   | OP, USA          | Parallel        | Supp     | Almond                        | 84                | CHO-LCD                                            | 53:18:29<br>32:39:29                         | Isocaloric | 24 wks            | 8                              | Agency          |
| Tapsell et al, 2004 (39)           | Walnut Control                                                           | 37 DM2                    | 57.7 (9)<br>59.3 (7.1)                                 | 87.6 (12.8)<br>81.9 (11.2)                           | OP, Australia    | Parallel        | Supp     | Walnut                        | 30                | Modified Fat                                       | 44:32:22<br>41:33:23                         | Isocaloric | 6 months          | 6                              | Agency          |
| Tamizifar et al, 2005 (40)         | Almond Control                                                           | 30 HC (17 M, 13 W)        | 56 (6.1)                                               | 63 (8.9)                                             | OP, Iran         | Crossover       | Supp     | Almond                        | 25                | NCEP Step 1 diet                                   | 47:37:17<br>45:29:15                         | Isocaloric | 4 wks             | 5                              | N/A             |
| Kocyyigit et al, 2006 (16)         | Pistachio Control                                                        | 44 (24 M, 20 W)           | 32.8 (6.7)                                             | 24.2 (6.1)<br>24.6 (5.6)                             | OP, Turkey       | Parallel        | DA       | Pistachio                     | 69                | Regular diet                                       | N/A                                          | Isocaloric | 3 wks             | 8                              | Agency          |
| Kuriansky et al, 2006 (41)         | Almond<br>Almond + Dark Chocolate<br>Dark chocolate<br>Control           | 47 (47 W)                 | 41.8 (11.7)<br>46.2 (7.8)<br>36.5 (11.9)<br>51.3 (6.3) | 25.3 (3.5)<br>27.2 (4.2)<br>23.9 (3.3)<br>26.1 (4.1) | OP, USA          | Parallel        | Supp     | Almond<br>Almond              | 60                | NCEP ATP III diet + Chocolate<br>NCEP ATP III diet | 51:34:15<br>46:39:15<br>55:30:15<br>57:27:16 | Isocaloric | 6 wks             | 5                              | Agency-Industry |
| Schutte et al, 2006 (53)*          | Walnut<br>Cashew<br>Control                                              | 62 MetS                   | 45.5<br>45.7<br>44.4                                   | 35.9<br>34.7<br>35.5                                 | OP, South Africa | Parallel        | Met      | Walnut<br>Cashew              | 85.5              | Control diet                                       | 47:36:17<br>47:36:17<br>50:33:18             | Isocaloric | 8 wks             | 7                              | Agency-Industry |
| Mukuddem-Petersen et al, 2007 (42) | Walnut<br>Cashew<br>Control                                              | 64 MetS                   | 45 (10)                                                | 107<br>99<br>106                                     | OP, South Africa | Parallel        | Met      | Walnut<br>Cashew              | 85.5 <sup>¶</sup> | Habitual diet                                      | 49:35:16<br>44:37:19<br>47:33:20             | Isocaloric | 8 wks             | 7                              | Agency-Industry |
| Sheridan et al, 2007 (17)          | Pistachio Control                                                        | 15 HC                     | 60 (11.2)                                              | 175 (26)                                             | OP, USA          | Crossover       | Supp     | Pistachio                     | 35                | Regular diet                                       | 52:31:17<br>53:31:16                         | Isocaloric | 4 wks             | 6                              | Agency          |

Table 4 Cont'd

| Study, year (Reference)            | Participants           | Mean Age (SD or range), y  | Mean Body Weight or BMI (SD or range)§ | Setting         | Design    | Feeding Control | Nut type   | Nuts Dose (g/day)¶ | Comparator                | Diet ††                | Energy Balance             | Follow-Up | MQS §§ | Funding Sources |
|------------------------------------|------------------------|----------------------------|----------------------------------------|-----------------|-----------|-----------------|------------|--------------------|---------------------------|------------------------|----------------------------|-----------|--------|-----------------|
| Gebauer et al, 2008 (41)           |                        |                            |                                        |                 |           |                 |            |                    |                           |                        |                            |           |        |                 |
| 1 Pistachio                        |                        |                            |                                        |                 |           |                 | Pistachio  | 37                 |                           | 53:34:16               |                            |           |        |                 |
| 2 Pistachio                        | 28 HLP (10 M, 18 W)    | 48 (7.9)                   | 76.6 (13.2)                            | OP, USA         | Crossover | Met             | Pistachio  | 74                 | NCEP Step 1 diet          | 57:29:16<br>62:25:15   | Isocaloric                 | 4 wks     | 5      | Agency          |
| Control                            |                        |                            |                                        |                 |           |                 |            |                    |                           |                        |                            |           |        |                 |
| Griel et al, 2008 (42)             |                        |                            |                                        |                 |           |                 |            |                    |                           |                        |                            |           |        |                 |
| Macadamia                          | 25 HC                  | 50.2 (8.4)                 | 26.3 (3.3)                             | OP, USA         | Crossover | Met             | Macadamia  | 42.5**             | AAD                       | 50:33:19<br>52:33:17   | Isocaloric                 | 5 wks     | 8      | Agency-Industry |
| Control                            |                        |                            |                                        |                 |           |                 |            |                    |                           |                        |                            |           |        |                 |
| Jenkins et al, 2008 (61)*          |                        |                            |                                        |                 |           |                 |            |                    |                           |                        |                            |           |        |                 |
| Almond                             | 27 HLP (15 M, 12 W)    | 64 (9)                     | 71.2 (2.5)<br>71.0 (2.4)               | OP, Canada      | Crossover | Supp            | Almond     | 73                 | NCEP Step 2 diet + Muffin | 47:36:17<br>57:26:18   | Isocaloric                 | 4 wks     | 6      | Agency          |
| Control                            |                        |                            |                                        |                 |           |                 |            |                    |                           |                        |                            |           |        |                 |
| Rajaram et al, 2009 (43)           |                        |                            |                                        |                 |           |                 |            |                    |                           |                        |                            |           |        |                 |
| Walnut                             | 25 NL-HLP (14 M, 11 W) | 23-65                      | 71.9 (15.5)<br>71.7 (15.5)             | OP, USA         | Crossover | Met             | Walnut     | 42.5               | AAD                       | 60:31:15<br>57:30:14   | Isocaloric                 | 4 wks     | 5      | Agency          |
| Control                            |                        |                            |                                        |                 |           |                 |            |                    |                           |                        |                            |           |        |                 |
| Tapsell et al, 2009 (44)           |                        |                            |                                        |                 |           |                 |            |                    |                           |                        |                            |           |        |                 |
| Walnut                             | 35 DM2†                | 54 (8.7)                   | 92.3 (15.7)<br>93.4 (3)                | OP, Australia   | Parallel  | Supp            | Walnut     | 30                 | Low Fat diet              | 42:29:24<br>41:34:20   | Isocaloric                 | 12 months | 7      | Agency          |
| Control                            |                        |                            |                                        |                 |           |                 |            |                    |                           |                        |                            |           |        |                 |
| Li et al, 2010 (11)                |                        |                            |                                        |                 |           |                 |            |                    |                           |                        |                            |           |        |                 |
| Almond                             | 52 OW†                 | 45.4 (2.0)<br>47.3 (2.3)   | 86 (26.8)<br>85.5 (40.2)               | OP, USA         | Parallel  | Supp            | Pistachio  | 53                 | Pretzel                   | 55:30:15<br>65:20:15   | Hypocaloric<br>Hypocaloric | 12 wks    | 7      | Agency          |
| Control                            |                        |                            |                                        |                 |           |                 |            |                    |                           |                        |                            |           |        |                 |
| Ma et al, 2010 (45)                |                        |                            |                                        |                 |           |                 |            |                    |                           |                        |                            |           |        |                 |
| Walnut                             | 22 DM2†                | 58.1 (9.2)                 | 89 (15.5)                              | OP, USA         | Crossover | Supp            | Walnut     | 56                 | Ad libitum diet           | 39:44:17<br>43:38:19   | Isocaloric                 | 8 wks     | 5      | N/A             |
| Control                            |                        |                            |                                        |                 |           |                 |            |                    |                           |                        |                            |           |        |                 |
| Torabian et al, 2010 (12)          |                        |                            |                                        |                 |           |                 |            |                    |                           |                        |                            |           |        |                 |
| Walnut                             | 87 (38 M, 49 W)        | 54 (10.2)                  | 75.6 (13.2)                            | OP, USA         | Crossover | Supp            | Walnut     | 46                 | Habitual diet             | N/A                    | Isocaloric                 | 6 months  | 6      | Agency          |
| Control                            |                        |                            |                                        |                 |           |                 |            |                    |                           |                        |                            |           |        |                 |
| Wien et al, 2010 (46)              |                        |                            |                                        |                 |           |                 |            |                    |                           |                        |                            |           |        |                 |
| Almond                             | 65 PD (17 M, 48 W)     | 53 (9)<br>54 (11)          | 82.9 (14.4)<br>80.5 (14.4)             | OP, USA         | Parallel  | Supp            | Almond     | 58                 | AAD                       | 42:39:19<br>48:30:21   | Isocaloric                 | 16 wks    | 9      | Agency          |
| Control                            |                        |                            |                                        |                 |           |                 |            |                    |                           |                        |                            |           |        |                 |
| Wu et al, 2010 (47)                |                        |                            |                                        |                 |           |                 |            |                    |                           |                        |                            |           |        |                 |
| Walnut                             | 189 MetS               | 48.2 (8.4)<br>48.6 (8)     | 72.2 (11.4)<br>70.6 (10.9)             | OP, USA         | Parallel  | Supp            | Walnut     | 30                 | AHA                       | 48:37:15<br>51:34:15   | Isocaloric                 | 12 wks    | 9      | Agency          |
| Control                            |                        |                            |                                        |                 |           |                 |            |                    |                           |                        |                            |           |        |                 |
| Casas-Agustench et al, 2011 (48)   |                        |                            |                                        |                 |           |                 |            |                    |                           |                        |                            |           |        |                 |
| Mixed Nuts                         | 50 MetS (28 M, 22 W)   | 52.9 (8.4)<br>50.6 (8.4)   | 31.6 (2.8)<br>30.0 (3.3)               | OP, Spain       | Parallel  | Supp            | Mixed Nuts | 30                 | Prudent diet              | 41:36:19<br>42:36:19   | Isocaloric                 | 12 wks    | 6      | Agency          |
| Control                            |                        |                            |                                        |                 |           |                 |            |                    |                           |                        |                            |           |        |                 |
| Cohen et al, 2011 (19)             |                        |                            |                                        |                 |           |                 |            |                    |                           |                        |                            |           |        |                 |
| Almond                             | 13 DM2 (7 M, 6 W)      | 66 (11.9)                  | 96.1 (40.4)<br>105.1 (32.1)            | OP, USA         | Parallel  | Supp            | Almond     | 28                 | Cheese sticks             | N/A                    | Isocaloric                 | 12 wks    | 7      | Agency          |
| Control                            |                        |                            |                                        |                 |           |                 |            |                    |                           |                        |                            |           |        |                 |
| Jenkins et al, 2011 (20)           |                        |                            |                                        |                 |           |                 |            |                    |                           |                        |                            |           |        |                 |
| Mixed Nuts                         | 79 DM2 (52 M, 27 W)    | 63 (9)<br>61 (10)          | 80 (15)<br>83 (15)                     | OP, Canada      | Parallel  | Supp            | Mixed nuts | 75¶                | NCEP Step 2 diet + Muffin | 41:41:18<br>46:35:19   | Isocaloric                 | 12 wks    | 8      | Agency          |
| Control                            |                        |                            |                                        |                 |           |                 |            |                    |                           |                        |                            |           |        |                 |
| Li et al, 2011 (21)                |                        |                            |                                        |                 |           |                 |            |                    |                           |                        |                            |           |        |                 |
| Almond                             | 20 DM2 (9 M, 11 W)     | 58 (8.9)                   | 26 (3.1)                               | OP, Taiwan      | Crossover | Met             | Almond     | 56                 | NCEP step 2 diet          | 47:37:17<br>57:27:17   | Isocaloric                 | 4 wks     | 5      | Agency          |
| Control                            |                        |                            |                                        |                 |           |                 |            |                    |                           |                        |                            |           |        |                 |
| Trey et al, 2011 (49)              |                        |                            |                                        |                 |           |                 |            |                    |                           |                        |                            |           |        |                 |
| Hazelnut                           | 61                     | 38.9 (14.3)<br>36.1 (15.2) | 72 (11.1)<br>67.3 (9.5)                | OP, New Zealand | Parallel  | Supp            | Hazelnut   | 42                 | Regular diet              | 45:39:16††<br>50:33:17 | Isocaloric                 | 12 wks    | 9      | Agency          |
| Control                            |                        |                            |                                        |                 |           |                 |            |                    |                           |                        |                            |           |        |                 |
| Darvish Damavandi et al, 2012 (18) |                        |                            |                                        |                 |           |                 |            |                    |                           |                        |                            |           |        |                 |
| Cashew                             | 43 DM2 (9 M, 34 W)     | 51 (7.9)<br>56 (5.7)       | 72.1 (13.1)<br>71.9 (9.7)              | OP, Iran        | Parallel  | Supp            | Cashew     | 30                 | Regular diet              | 53:32:16<br>57:27:16   | Isocaloric                 | 8 wks     | 3      | N/A             |
| Control                            |                        |                            |                                        |                 |           |                 |            |                    |                           |                        |                            |           |        |                 |
| Foster et al, 2012 (50)            |                        |                            |                                        |                 |           |                 |            |                    |                           |                        |                            |           |        |                 |
| Almond                             | 123 OW (11 M, 112 W)   | 47 (12)<br>46.7 (13)       | 94 (13.1)<br>91.5 (11.9)               | OP, USA         | Parallel  | Supp            | Almond     | 56                 | Nut free diet             | N/A                    | Hypocaloric<br>Hypocaloric | 18 months | 9      | Agency          |
| Control                            |                        |                            |                                        |                 |           |                 |            |                    |                           |                        |                            |           |        |                 |
| Katz et al, 2012 (51)              |                        |                            |                                        |                 |           |                 |            |                    |                           |                        |                            |           |        |                 |
| Walnut                             | 40 OW†                 | 57.4 (11.9)                | 33.2 (4.4)                             | OP, USA         | Crossover | Supp            | Walnut     | 56                 | Ad libitum diet           | 41:41:17<br>45:34:20   | Isocaloric                 | 8 wks     | 7      | Industry        |
| Control                            |                        |                            |                                        |                 |           |                 |            |                    |                           |                        |                            |           |        |                 |

| Study, year (Reference)            | Participants           | Mean Age (SD or range), y  | Mean Body Weight or BMI (SD or range)§ | Setting         | Design    | Feeding Control | Nut type   | Nuts Dose (g/day)¶ | Comparator                | Diet ††                | Energy Balance             | Follow-Up | MQS §§ | Funding Sources ¶¶ |
|------------------------------------|------------------------|----------------------------|----------------------------------------|-----------------|-----------|-----------------|------------|--------------------|---------------------------|------------------------|----------------------------|-----------|--------|--------------------|
| Gebauer et al, 2008 (43)           |                        |                            |                                        |                 |           |                 |            |                    |                           |                        |                            |           |        |                    |
| 1 Pistachio                        |                        |                            |                                        |                 |           |                 | Pistachio  | 37                 |                           | 53:34:16               |                            |           |        |                    |
| 2 Pistachio                        | 28 HLP (10 M, 18 W)    | 48 (7.9)                   | 76.6 (13.2)                            | OP, USA         | Crossover | Met             | Pistachio  | 74                 | NCEP Step 1 diet          | 57:29:16<br>62:25:15   | Isocaloric                 | 4 wks     | 5      | Agency             |
| Control                            |                        |                            |                                        |                 |           |                 |            |                    |                           |                        |                            |           |        |                    |
| Griehl et al, 2008 (44)            |                        |                            |                                        |                 |           |                 |            |                    |                           |                        |                            |           |        |                    |
| Macadamia                          | 25 HC                  | 50.2 (8.4)                 | 26.3 (3.3)                             | OP, USA         | Crossover | Met             | Macadamia  | 42.5**             | AAD                       | 50:33:19<br>52:33:17   | Isocaloric                 | 5 wks     | 8      | Agency-Industry    |
| Control                            |                        |                            |                                        |                 |           |                 |            |                    |                           |                        |                            |           |        |                    |
| Jenkins et al, 2008 (64)*          |                        |                            |                                        |                 |           |                 |            |                    |                           |                        |                            |           |        |                    |
| Almond                             | 27 HLP (15 M, 12 W)    | 64 (9)                     | 71.2 (2.5)<br>71.0 (2.4)               | OP, Canada      | Crossover | Supp            | Almond     | 73                 | NCEP Step 2 diet + Muffin | 47:36:17<br>57:26:18   | Isocaloric                 | 4 wks     | 6      | Agency             |
| Control                            |                        |                            |                                        |                 |           |                 |            |                    |                           |                        |                            |           |        |                    |
| Rajaram et al, 2009 (45)           |                        |                            |                                        |                 |           |                 |            |                    |                           |                        |                            |           |        |                    |
| Walnut                             | 25 NL-HLP (14 M, 11 W) | 23-65                      | 71.9 (15.5)<br>71.7 (15.5)             | OP, USA         | Crossover | Met             | Walnut     | 42.5               | AAD                       | 60:31:15<br>57:30:14   | Isocaloric                 | 4 wks     | 5      | Agency             |
| Control                            |                        |                            |                                        |                 |           |                 |            |                    |                           |                        |                            |           |        |                    |
| Tapsell et al, 2009 (46)           |                        |                            |                                        |                 |           |                 |            |                    |                           |                        |                            |           |        |                    |
| Walnut                             | 35 DM2†                | 54 (8.7)                   | 92.3 (15.7)<br>93.4 (3)                | OP, Australia   | Parallel  | Supp            | Walnut     | 30                 | Low Fat diet              | 42:29:24<br>41:34:20   | Isocaloric                 | 12 months | 7      | Agency             |
| Control                            |                        |                            |                                        |                 |           |                 |            |                    |                           |                        |                            |           |        |                    |
| Li et al, 2010 (11)                |                        |                            |                                        |                 |           |                 |            |                    |                           |                        |                            |           |        |                    |
| Almond                             | 52 OW†                 | 45.4 (2.0)<br>47.3 (2.3)   | 86 (26.8)<br>85.5 (40.2)               | OP, USA         | Parallel  | Supp            | Pistachio  | 53                 | Pretzel                   | 55:30:15<br>65:20:15   | Hypocaloric<br>Hypocaloric | 12 wks    | 7      | Agency             |
| Control                            |                        |                            |                                        |                 |           |                 |            |                    |                           |                        |                            |           |        |                    |
| Ma et al, 2010 (47)                |                        |                            |                                        |                 |           |                 |            |                    |                           |                        |                            |           |        |                    |
| Walnut                             | 22 DM2†                | 58.1 (9.2)                 | 89 (15.5)                              | OP, USA         | Crossover | Supp            | Walnut     | 56                 | Ad libitum diet           | 39:44:17<br>43:38:19   | Isocaloric                 | 8 wks     | 5      | N/A                |
| Control                            |                        |                            |                                        |                 |           |                 |            |                    |                           |                        |                            |           |        |                    |
| Torabian et al, 2010 (12)          |                        |                            |                                        |                 |           |                 |            |                    |                           |                        |                            |           |        |                    |
| Walnut                             | 87 (38 M, 49 W)        | 54 (10.2)                  | 75.6 (13.2)                            | OP, USA         | Crossover | Supp            | Walnut     | 46                 | Habitual diet             | N/A                    | Isocaloric                 | 6 months  | 6      | Agency             |
| Control                            |                        |                            |                                        |                 |           |                 |            |                    |                           |                        |                            |           |        |                    |
| Wien et al, 2010 (48)              |                        |                            |                                        |                 |           |                 |            |                    |                           |                        |                            |           |        |                    |
| Almond                             | 65 PD (17 M, 48 W)     | 53 (9)<br>54 (11)          | 82.9 (14.4)<br>80.5 (14.4)             | OP, USA         | Parallel  | Supp            | Almond     | 58                 | AAD                       | 42:39:19<br>48:30:21   | Isocaloric                 | 16 wks    | 9      | Agency             |
| Control                            |                        |                            |                                        |                 |           |                 |            |                    |                           |                        |                            |           |        |                    |
| Wu et al, 2010 (49)                |                        |                            |                                        |                 |           |                 |            |                    |                           |                        |                            |           |        |                    |
| Walnut                             | 189 MetS               | 48.2 (8.4)<br>48.6 (8)     | 72.2 (11.4)<br>70.6 (10.9)             | OP, USA         | Parallel  | Supp            | Walnut     | 30                 | AHA                       | 48:37:15<br>51:34:15   | Isocaloric                 | 12 wks    | 9      | Agency             |
| Control                            |                        |                            |                                        |                 |           |                 |            |                    |                           |                        |                            |           |        |                    |
| Casas-Agustench et al, 2011 (50)   |                        |                            |                                        |                 |           |                 |            |                    |                           |                        |                            |           |        |                    |
| Mixed Nuts                         | 50 MetS (28 M, 22 W)   | 52.9 (8.4)<br>50.6 (8.4)   | 31.6 (2.8)<br>30.0 (3.3)               | OP, Spain       | Parallel  | Supp            | Mixed Nuts | 30                 | Prudent diet              | 41:36:19<br>42:36:19   | Isocaloric                 | 12 wks    | 6      | Agency             |
| Control                            |                        |                            |                                        |                 |           |                 |            |                    |                           |                        |                            |           |        |                    |
| Cohen et al, 2011 (19)             |                        |                            |                                        |                 |           |                 |            |                    |                           |                        |                            |           |        |                    |
| Almond                             | 13 DM2 (7 M, 6 W)      | 66 (11.9)                  | 96.1 (40.4)<br>105.1 (32.1)            | OP, USA         | Parallel  | Supp            | Almond     | 28                 | Cheese sticks             | N/A                    | Isocaloric                 | 12 wks    | 7      | Agency             |
| Control                            |                        |                            |                                        |                 |           |                 |            |                    |                           |                        |                            |           |        |                    |
| Jenkins et al, 2011 (20)           |                        |                            |                                        |                 |           |                 |            |                    |                           |                        |                            |           |        |                    |
| Mixed Nuts                         | 79 DM2 (52 M, 27 W)    | 63 (9)<br>61 (10)          | 80 (15)<br>83 (15)                     | OP, Canada      | Parallel  | Supp            | Mixed nuts | 75¶                | NCEP Step 2 diet + Muffin | 41:41:18<br>46:35:19   | Isocaloric                 | 12 wks    | 8      | Agency             |
| Control                            |                        |                            |                                        |                 |           |                 |            |                    |                           |                        |                            |           |        |                    |
| Li et al, 2011 (21)                |                        |                            |                                        |                 |           |                 |            |                    |                           |                        |                            |           |        |                    |
| Almond                             | 20 DM2 (9 M, 11 W)     | 58 (8.9)                   | 26 (3.1)                               | OP, Taiwan      | Crossover | Met             | Almond     | 56                 | NCEP step 2 diet          | 47:37:17<br>57:27:17   | Isocaloric                 | 4 wks     | 5      | Agency             |
| Control                            |                        |                            |                                        |                 |           |                 |            |                    |                           |                        |                            |           |        |                    |
| Trey et al, 2011 (51)              |                        |                            |                                        |                 |           |                 |            |                    |                           |                        |                            |           |        |                    |
| Hazelnut                           | 61                     | 38.9 (14.3)<br>36.1 (15.2) | 72 (11.1)<br>67.3 (9.5)                | OP, New Zealand | Parallel  | Supp            | Hazelnut   | 42                 | Regular diet              | 45:39:16††<br>50:33:17 | Isocaloric                 | 12 wks    | 9      | Agency             |
| Control                            |                        |                            |                                        |                 |           |                 |            |                    |                           |                        |                            |           |        |                    |
| Darvish Damavandi et al, 2012 (18) |                        |                            |                                        |                 |           |                 |            |                    |                           |                        |                            |           |        |                    |
| Cashew                             | 43 DM2 (9 M, 34 W)     | 51 (7.9)<br>56 (5.7)       | 72.1 (13.1)<br>71.9 (9.7)              | OP, Iran        | Parallel  | Supp            | Cashew     | 30                 | Regular diet              | 53:32:16<br>57:27:16   | Isocaloric                 | 8 wks     | 3      | N/A                |
| Control                            |                        |                            |                                        |                 |           |                 |            |                    |                           |                        |                            |           |        |                    |
| Foster et al, 2012 (52)            |                        |                            |                                        |                 |           |                 |            |                    |                           |                        |                            |           |        |                    |
| Almond                             | 123 OW (11 M, 112 W)   | 47 (12)<br>46.7 (13)       | 94 (13.1)<br>91.5 (11.9)               | OP, USA         | Parallel  | Supp            | Almond     | 56                 | Nut free diet             | N/A                    | Hypocaloric<br>Hypocaloric | 18 months | 9      | Agency             |
| Control                            |                        |                            |                                        |                 |           |                 |            |                    |                           |                        |                            |           |        |                    |
| Katz et al, 2012 (53)              |                        |                            |                                        |                 |           |                 |            |                    |                           |                        |                            |           |        |                    |
| Walnut                             | 40 OW†                 | 57.4 (11.9)                | 33.2 (4.4)                             | OP, USA         | Crossover | Supp            | Walnut     | 56                 | Ad libitum diet           | 41:41:17<br>45:34:20   | Isocaloric                 | 8 wks     | 7      | Industry           |
| Control                            |                        |                            |                                        |                 |           |                 |            |                    |                           |                        |                            |           |        |                    |

| Study, year (Reference)            | Participants           | Mean Age (SD or range), y              | Mean Body Weight or BMI (SD or range) <sup>§</sup> | Setting         | Design    | Feeding Control | Nut type   | Nuts Dose (g/d) <sup>  </sup> | Comparator                | Diet ††    | Energy Balance | Follow-Up | MQS §§ | Funding Sources ††† |
|------------------------------------|------------------------|----------------------------------------|----------------------------------------------------|-----------------|-----------|-----------------|------------|-------------------------------|---------------------------|------------|----------------|-----------|--------|---------------------|
| Gebauer et al, 2008 (43)           |                        |                                        |                                                    |                 |           |                 |            |                               |                           |            |                |           |        |                     |
| 1 PD                               |                        |                                        |                                                    |                 |           |                 | Pistachio  | 37                            |                           | 53:34:16   |                |           |        |                     |
| 2 PD                               |                        |                                        |                                                    |                 |           |                 | Pistachio  | 74                            |                           | 57:29:16   | Isocaloric     | 4 wks     | 5      | Agency              |
| Control                            | 28 HLP (10 M, 18 W)    | 48 (7.9)                               | 76.6 (13.2)                                        | OP, USA         | Crossover | Met             |            |                               | NCEP Step 1 diet          | 62:25:15   |                |           |        |                     |
| Griehl et al, 2008 (44)            |                        |                                        |                                                    |                 |           |                 |            |                               |                           |            |                |           |        |                     |
| Macadamia                          |                        |                                        |                                                    |                 |           |                 | Macadamia  | 42.5**                        |                           | 50:33:19   | Isocaloric     | 5 wks     | 8      | Agency-Industry     |
| Control                            | 25 HC                  | 50.2 (8.4)                             | 26.3 (3.3)                                         | OP, USA         | Crossover | Met             |            |                               | AAD                       | 52:33:17   |                |           |        |                     |
| Jenkins et al, 2008 (54)*          |                        |                                        |                                                    |                 |           |                 |            |                               |                           |            |                |           |        |                     |
| Almond                             |                        |                                        |                                                    |                 |           |                 | Almond     | 73                            |                           | 47:36:17   | Isocaloric     | 4 wks     | 6      | Agency              |
| Control                            | 27 HLP (15 M, 12 W)    | 64 (9)                                 | 71.2 (2.5)<br>71.0 (2.4)                           | OP, Canada      | Crossover | Supp            |            |                               | NCEP Step 2 diet + Muffin | 57:26:18   |                |           |        |                     |
| Rajaram et al, 2009 (45)           |                        |                                        |                                                    |                 |           |                 |            |                               |                           |            |                |           |        |                     |
| Walnut                             |                        |                                        |                                                    |                 |           |                 | Walnut     | 42.5                          |                           | 60:31:15   | Isocaloric     | 4 wks     | 5      | Agency              |
| Control                            | 25 NL-HLP (14 M, 11 W) | 23-65                                  | 71.9 (15.5)<br>71.7 (15.5)                         | OP, USA         | Crossover | Met             |            |                               | AAD                       | 57:30:14   |                |           |        |                     |
| Tapsell et al, 2009 (46)           |                        |                                        |                                                    |                 |           |                 |            |                               |                           |            |                |           |        |                     |
| Walnut                             |                        |                                        |                                                    |                 |           |                 | Walnut     | 30                            |                           | 42:29:24   | Isocaloric     | 12 months | 7      | Agency              |
| Control                            | 35 DM2†                | 54 (8.7)                               | 92.3 (15.7)<br>93.4 (3)                            | OP, Australia   | Parallel  | Supp            |            |                               | Low Fat diet              | 41:34:20   |                |           |        |                     |
| Li et al, 2010 (11)                |                        |                                        |                                                    |                 |           |                 |            |                               |                           |            |                |           |        |                     |
| Almond                             |                        |                                        |                                                    |                 |           |                 | Pistachio  | 53                            |                           | 55:30:15   | Hypocaloric    | 12 wks    | 7      | Agency              |
| Control                            | 52 OW†                 | 45.4 (2.0)<br>47.3 (2.3)               | 86 (26.8)<br>85.5 (40.2)                           | OP, USA         | Parallel  | Supp            |            |                               | Pretzel                   | 65:20:15   | Hypocaloric    |           |        |                     |
| Ma et al, 2010 (47)                |                        |                                        |                                                    |                 |           |                 |            |                               |                           |            |                |           |        |                     |
| Walnut                             |                        |                                        |                                                    |                 |           |                 | Walnut     | 56                            |                           | 39:44:17   | Isocaloric     | 8 wks     | 5      | N/A                 |
| Control                            | 22 DM2†                | 58.1 (9.2)                             | 89 (15.5)                                          | OP, USA         | Crossover | Supp            |            |                               | Ad libitum diet           | 43:38:19   |                |           |        |                     |
| Torabian et al, 2010 (12)          |                        |                                        |                                                    |                 |           |                 |            |                               |                           |            |                |           |        |                     |
| Walnut                             |                        |                                        |                                                    |                 |           |                 | Walnut     | 46                            |                           | N/A        | Isocaloric     | 6 months  | 6      | Agency              |
| Control                            | 87 (38 M, 49 W)        | 54 (10.2)                              | 75.6 (13.2)                                        | OP, USA         | Crossover | Supp            |            |                               | Habitual diet             |            |                |           |        |                     |
| Wien et al, 2010 (48)              |                        |                                        |                                                    |                 |           |                 |            |                               |                           |            |                |           |        |                     |
| Almond                             |                        |                                        |                                                    |                 |           |                 | Almond     | 58                            |                           | 42:39:19   | Isocaloric     | 16 wks    | 9      | Agency              |
| Control                            | 65 PD (17 M, 48 W)     | 53 (9)<br>54 (11)                      | 82.9 (14.4)<br>80.5 (14.4)                         | OP, USA         | Parallel  | Supp            |            |                               | AAD                       | 48:30:21   |                |           |        |                     |
| Wu et al, 2010 (49)                |                        |                                        |                                                    |                 |           |                 |            |                               |                           |            |                |           |        |                     |
| Walnut                             |                        |                                        |                                                    |                 |           |                 | Walnut     | 30                            |                           | 48:37:15   | Isocaloric     | 12 wks    | 9      | Agency              |
| Control                            | 189 MetS               | 48.2 (8.4)<br>48.6 (8)                 | 72.2 (11.4)<br>70.6 (10.9)                         | OP, USA         | Parallel  | Supp            |            |                               | AHA                       | 51:34:15   |                |           |        |                     |
| Casas-Agustench et al, 2011 (50)   |                        |                                        |                                                    |                 |           |                 |            |                               |                           |            |                |           |        |                     |
| Mixed Nuts                         |                        |                                        |                                                    |                 |           |                 | Mixed Nuts | 30                            |                           | 41:36:19   | Isocaloric     | 12 wks    | 6      | Agency              |
| Control                            | 50 MetS (28 M, 22 W)   | 52.9 (8.4)<br>50.6 (8.4)               | 31.6 (2.8)<br>30.0 (3.3)                           | OP, Spain       | Parallel  | Supp            |            |                               | Prudent diet              | 42:36:19   |                |           |        |                     |
| Cohen et al, 2011 (19)             |                        |                                        |                                                    |                 |           |                 |            |                               |                           |            |                |           |        |                     |
| Almond                             |                        |                                        |                                                    |                 |           |                 | Almond     | 28                            |                           | N/A        | Isocaloric     | 12 wks    | 7      | Agency              |
| Control                            | 13 DM2 (7 M, 6 W)      | 66 (11.9)                              | 96.1 (40.4)<br>105.1 (32.1)                        | OP, USA         | Parallel  | Supp            |            |                               | Cheese sticks             |            |                |           |        |                     |
| Jenkins et al, 2011 (20)           |                        |                                        |                                                    |                 |           |                 |            |                               |                           |            |                |           |        |                     |
| Mixed Nuts                         |                        |                                        |                                                    |                 |           |                 | Mixed nuts | 75†                           |                           | 41:41:18   | Isocaloric     | 12 wks    | 8      | Agency              |
| Control                            | 79 DM2 (52 M, 27 W)    | 63 (9)<br>61 (10)                      | 80 (15)<br>83 (15)                                 | OP, Canada      | Parallel  | Supp            |            |                               | NCEP Step 2 diet + Muffin | 46:35:19   |                |           |        |                     |
| Li et al, 2011 (21)                |                        |                                        |                                                    |                 |           |                 |            |                               |                           |            |                |           |        |                     |
| Almond                             |                        |                                        |                                                    |                 |           |                 | Almond     | 56                            |                           | 47:37:17   | Isocaloric     | 4 wks     | 5      | Agency              |
| Control                            | 20 DM2 (9 M, 11 W)     | 58 (8.9)                               | 26 (3.1)                                           | OP, Taiwan      | Crossover | Met             |            |                               | NCEP step 2 diet          | 57:27:17   |                |           |        |                     |
| Tey et al, 2011 (51)               |                        |                                        |                                                    |                 |           |                 |            |                               |                           |            |                |           |        |                     |
| Hazelnut                           |                        |                                        |                                                    |                 |           |                 | Hazelnut   | 42                            |                           | 45:39:16†† | Isocaloric     | 12 wks    | 9      | Agency              |
| Control                            | 61                     | 38.9 (14.3)<br>36.1 (15.2)             | 72 (11.1)<br>67.3 (9.5)                            | OP, New Zealand | Parallel  | Supp            |            |                               | Regular diet              | 50:33:17   |                |           |        |                     |
| Darvish Damavandi et al, 2012 (18) |                        |                                        |                                                    |                 |           |                 |            |                               |                           |            |                |           |        |                     |
| Cashew                             |                        |                                        |                                                    |                 |           |                 | Cashew     | 30                            |                           | 53:32:16   | Isocaloric     | 8 wks     | 3      | N/A                 |
| Control                            | 43 DM2 (9 M, 34 W)     | 51 (7.9)<br>56 (5.7)                   | 72.1 (13.1)<br>71.9 (9.7)                          | OP, Iran        | Parallel  | Supp            |            |                               | Regular diet              | 57:27:16   |                |           |        |                     |
| Foster et al, 2012 (52)            |                        |                                        |                                                    |                 |           |                 |            |                               |                           |            |                |           |        |                     |
| Almond                             |                        |                                        |                                                    |                 |           |                 | Almond     | 56                            |                           | N/A        | Hypocaloric    | 18 months | 9      | Agency              |
| Control                            | 123 OW (11 M, 112 W)   | 47 (12)<br>46.7 (13)                   | 94 (13.1)<br>91.5 (11.9)                           | OP, USA         | Parallel  | Supp            |            |                               | Nut free diet             |            | Hypocaloric    |           |        |                     |
| Wang et al, 2012 (22)              |                        |                                        |                                                    |                 |           |                 |            |                               |                           |            |                |           |        |                     |
| Pistachios                         |                        |                                        |                                                    |                 |           |                 | Pistachio  | 42                            |                           |            |                |           |        |                     |
| High pistachios                    |                        |                                        |                                                    |                 |           |                 | Pistachio  | 70                            |                           | N/A        | Isocaloric     | 12 wks    | 5      | Industry            |
| Control                            | 86 MetS                | 51.9 (8.8)<br>51.8 (9.4)<br>50.7 (9.9) | 28.1 (3.2)<br>28 (4.5)<br>28 (4.4)                 | OP, China       | Parallel  | Supp            |            |                               | AHA Step 1 diet           |            |                |           |        |                     |
| West et al, 2012 (55)*             |                        |                                        |                                                    |                 |           |                 |            |                               |                           |            |                |           |        |                     |
| 1 Pistachio                        |                        |                                        |                                                    |                 |           |                 | Pistachio  | 37                            |                           | 53:34:16   |                |           |        |                     |
| 2 Pistachio                        |                        |                                        |                                                    |                 |           |                 | Pistachio  | 74                            |                           | 57:29:16   | Isocaloric     | 4 wks     | 5      | Agency              |
| Control                            | 28 HLP (10 M, 18 W)    | 48 (7.9)                               | 76.6 (13.2)                                        | OP, USA         | Crossover | Met             |            |                               | NCEP Step 1 diet          | 62:25:15   |                |           |        |                     |
| Somerses et al, 2013 (9)           |                        |                                        |                                                    |                 |           |                 |            |                               |                           |            |                |           |        |                     |
| Macadamia                          |                        |                                        |                                                    |                 |           |                 | Macadamia  | 46                            |                           | 36:38:21   | Isocaloric     | 10 wks    | 9      | Agency              |
| Control                            | 64 OW (10 M, 54 W)     | 43.7 (8.4)<br>43.2 (10.9)              | 95 (14.7)<br>99.6 (15.2)                           | OP, Australia   | Parallel  | DA              |            |                               | Regular diet              | 41:38:17   |                |           |        |                     |



| Study, year (Reference)            | Participants         | Mean Age (SD or range), y | Mean Body Weight or BMI (SD or range), § | Setting         | Design    | Feeding Control | Nut type  | Nuts Dose (g/day)¶ | Comparator             | Diet ††  | Energy Balance | Follow-Up | MOS §§ | Funding Sources ¶¶ |
|------------------------------------|----------------------|---------------------------|------------------------------------------|-----------------|-----------|-----------------|-----------|--------------------|------------------------|----------|----------------|-----------|--------|--------------------|
| Wang et al, 2012 (22)              |                      |                           |                                          |                 |           |                 |           |                    |                        |          |                |           |        |                    |
| Pistachios                         |                      | 51.9 (8.8)                | 28.1 (3.2)                               |                 |           |                 | Pistachio | 42                 |                        |          |                |           |        |                    |
| High pistachios                    | 86 MetS              | 51.8 (9.4)                | 28 (4.5)                                 | OP, China       |           | Supp            | Pistachio | 70                 | AHA Step 1 diet        | N/A      | Isocaloric     | 12 wks    | 5      | Industry           |
| Control                            |                      | 50.7 (9.9)                | 28 (4.4)                                 |                 |           |                 |           |                    |                        |          |                |           |        |                    |
| West et al, 2012 (62)*             |                      |                           |                                          |                 |           |                 |           |                    |                        |          |                |           |        |                    |
| 1 Pistachio                        | 28 HLP (10 M, 18 W)  | 48 (7.9)                  | 76.6 (13.2)                              | OP, USA         | Crossover | Met             | Pistachio | 37                 |                        | 53:34:16 | Isocaloric     | 4 wks     | 5      | Agency             |
| 2 Pistachio                        |                      |                           |                                          |                 |           |                 | Pistachio | 74                 | NCEP Step 1 diet       | 57:29:16 |                |           |        |                    |
| Control                            |                      |                           |                                          |                 |           |                 |           |                    |                        | 62:25:15 |                |           |        |                    |
| Anderson et al, 2013 (52)          |                      |                           |                                          |                 |           |                 |           |                    |                        |          |                |           |        |                    |
| Pistachio                          | 22 OW                | 55 (2)                    | 90 (3.6)                                 | OP, USA         | Parallel  | N/A             | Pistachio | 35.4               | N/A                    | N/A      | N/A            | 6 wks     | 5      | N/A                |
| Control                            |                      |                           |                                          |                 |           |                 |           |                    |                        |          |                |           |        |                    |
| Berryman et al, 2013 (53)          |                      |                           |                                          |                 |           |                 |           |                    |                        |          |                |           |        |                    |
| Almond                             | 53 HC                | N/A                       | N/A                                      | OP, USA         | Crossover | N/A             | Almond    | 42.5               | Muffin                 | 51:33:16 | Isocaloric     | 6 wks     | N/A    | N/A                |
| Control                            |                      |                           |                                          |                 |           |                 |           |                    |                        | 59:26:15 |                |           |        |                    |
| Darvish Damavandi et al, 2013 (54) |                      |                           |                                          |                 |           |                 |           |                    |                        |          |                |           |        |                    |
| Hazelnut                           | 48 DM2†              | 55.7 (7.7)                | 72.1 (10.3)                              | OP, Iran        | Parallel  | Supp            | Hazelnut  | 29                 | Self-selected diet     | 55:31:16 | Isocaloric     | 8 wks     | 6      | None               |
| Control                            |                      |                           | 72 (9.6)                                 |                 |           |                 |           |                    |                        | 60:25:17 |                |           |        |                    |
| Holligan et al, 2013 (63)*         |                      |                           |                                          |                 |           |                 |           |                    |                        |          |                |           |        |                    |
| 1 Pistachio                        | 28 HLP (10 M, 18 W)  | 48 (7.9)                  | 76.6 (13.2)                              | OP, USA         | Crossover | Met             | Pistachio | 37                 |                        | 53:34:16 | Isocaloric     | 4 wks     | N/A    | Agency             |
| 2 Pistachio                        |                      |                           |                                          |                 |           |                 | Pistachio | 74                 | NCEP Step 1 diet       | 57:29:16 |                |           |        |                    |
| Control                            |                      |                           |                                          |                 |           |                 |           |                    |                        | 62:25:15 |                |           |        |                    |
| Sauder et al, 2013 (55)            |                      |                           |                                          |                 |           |                 |           |                    |                        |          |                |           |        |                    |
| Pistachio                          | 30 DM2 (15 M, 15 W)† | 56.1 (1.4)                | 31.2 (1.1)                               | OP, USA         | Crossover | Met             | Pistachio | 73.4               | Low fat diet           | 51:33:17 | Isocaloric     | 4 wks     | N/A    | Industry           |
| Control                            |                      |                           |                                          |                 |           |                 |           |                    |                        | 55:27:18 |                |           |        |                    |
| Somersset et al, 2013 (9)          |                      |                           |                                          |                 |           |                 |           |                    |                        |          |                |           |        |                    |
| Macadamia                          | 64 OW (10 M, 54 W)   | 43.7 (8.4)                | 95 (14.7)                                | OP, Australia   | Parallel  | DA              | Macadamia | 46                 | Regular diet           | 36:38:21 | Isocaloric     | 10 wks    | 9      | Agency             |
| Control                            |                      | 43.2 (10.9)               | 99.6 (15.2)                              |                 |           |                 |           |                    |                        | 41:38:17 |                |           |        |                    |
| Tan et al, 2014 (56)               |                      |                           |                                          |                 |           |                 |           |                    |                        |          |                |           |        |                    |
| Almond (Breakfast)                 | 137 OW (48 M, 89 W)  | 32.9 (11.5)               | 80.5 (15)                                |                 |           |                 | Almond    | 43                 |                        | 50:16:15 |                |           |        |                    |
| Almond (Morning snack)             |                      | 27.8 (10.7)               | 83.2 (21.1)                              |                 |           |                 | Almond    | 43                 |                        | 51:15:14 |                |           |        |                    |
| Almond (Lunch)                     |                      | 29.3 (13.5)               | 84.8 (13.7)                              | OP, USA         | Parallel  | Supp            | Almond    | 43                 |                        | 48:16:17 | Isocaloric     | 4 wks     | 5      | Industry           |
| Almond (Afternoon snack)           |                      | 29 (11.9)                 | 81.8 (14.6)                              |                 |           |                 | Almond    | 43                 |                        | 49:15:16 |                |           |        |                    |
| Control                            |                      | 28.7 (9.6)                | 77.2 (16.8)                              |                 |           |                 |           |                    | Regular diet           | 48:15:16 |                |           |        |                    |
| Tey et al, 2013 (57)               |                      |                           |                                          |                 |           |                 |           |                    |                        |          |                |           |        |                    |
| Hazelnut 30 g                      | 107 OW (46 M, 61W)   | 43.8 (13.5)               | 86.2 (11.8)                              | OP, New Zealand | Parallel  | Supp            | Hazelnut  | 30                 |                        | 42:39:17 |                |           |        |                    |
| Hazelnut 60 g                      |                      | 42.8 (10.6)               | 92 (19.6)                                |                 |           |                 | Hazelnut  | 60                 |                        | 38:42:16 | Isocaloric     | 12 wks    | 6      | Agency             |
| Control                            |                      | 41.1 (13.1)               | 88.7 (16.7)                              |                 |           |                 |           |                    | Usual diet             | 47:33:17 |                |           |        |                    |
| Gulati et al, 2014 (58)            |                      |                           |                                          |                 |           |                 |           |                    |                        |          |                |           |        |                    |
| Pistachio                          | 68 MetS (37 M, 31 W) | 41.6 (8.4)                | 81.6 (12.9)                              | OP, India       | Parallel  | DA              | Pistachio | 50**               | Standard diabetic diet | 51:29:20 | Isocaloric     | 24 wks    | 4      | Industry           |
| Control                            |                      | 43.3 (8.1)                | 80.3 (10.3)                              |                 |           |                 |           |                    |                        | 60:25:15 |                |           |        |                    |
| Wu et al, 2014 (59)                |                      |                           |                                          |                 |           |                 |           |                    |                        |          |                |           |        |                    |
| Walnut                             | 40 (10 M, 30 W)      | 60 (1)                    | 24.9 (0.6)                               | OP, Germany     | Crossover | Supp            | Walnut    | 43                 | Western-type diet      | 50:35:15 | Isocaloric     | 8 wks     | 7      | Industry           |
| Control                            |                      |                           |                                          |                 |           |                 |           |                    |                        |          |                |           |        |                    |

Formatted: Space After: 0 pt, Line spacing: single

Table 1. Characteristics of RCTs Investigating the effect of Tree Nuts on Criteria of the Mets

MetS: metabolic syndrome; DM2: type 2 diabetes mellitus; OW: overweight; HLP: hyperlipidemic; NL-HLP: normal to mildly hyperlipidemic; HC: Hypercholesterolemic; NL-HC: normal to hypercholesterolemic; M: men; W: women; BMI: body mass index; OP: out-patient; IP: In-patient; USA: United States of America; SUPP: supplement; Met: metabolic; DA: dietary advice; N/A: not available; AHA: American Heart Association; AAD: Average American Diet; NCEP: National Cholesterol Education Program; CHO-LCD: Self-selected Complex Carbohydrate diet; WKS: weeks; MQS: Heyland Methodological Quality Score.

\* Companion reports: Jenkins et al, 2008 for Jenkins et al, 2002; Schutte et al, 2006 for Mukuddem-Petersen et al, 2007; [Wang-West et al, 2012](#) and [Holligan et al, 2013](#) for Gebauer et al, 2008.

† Baseline characteristics were given based on the number of randomized participants for Li et al, 2010  $n = 70$ ; Ma et al, 2010  $n = 24$ ; Zambon et al, 2000  $n = 55$ ; [Katz et al, 2012  \$n = 46\$](#) ; [Sauder et al, 2013  \$n = 30\$](#) ; [Gulati et al, 2014  \$n = 68\$](#)  and for recruited subjects for Tapsell et al. 2009 ( $n = 50$ ), and for age for [Darvish Damavandi et al, 2013 \( \$n = 50\$ \)](#).

‡ Mean age was given ~~separetly~~separately for men and women.

§ Body weight is reported in kg and BMI is reported in  $\text{kg}/\text{m}^2$ . BMI is reported only when no data on weight were available.

|| Nut dose is given based on grams (g) per g/day, 1oz = 28 g.

¶ Median was taken from a range given. [Iwamoto et al, 2010 range 50-54 g/day](#); [Jenkins et al, 2011 range 50-75 g/day](#); [Lovejoy et al, 2002 range 57-113 g/day](#); [Mukuddem-Petersen et al, 2007 range 63-108 g/day](#); [Torabian et al, 2010 range 28-64 g/day](#); [Zambon et al, 2000 range 41-56 g/day](#).

\*\* Based on 2100 kcal [for Griel et al, 2008 and based on 1400 kcal \(~60 kg\) for Gulati et al, 2014](#).

†† Energy from carbohydrate:fat:protein.

‡‡ Values for carbohydrates are given in geometric means.

§§ Trials with scores  $\geq 8$  were considered to be of high quality.

||| Agency funding is that from government, university, or not-for-profit health agency sources.

Formatted: Font: Italic

Formatted: Font: Italic

Formatted: Font: Italic

Formatted: Font: Italic

Formatted: Superscript

Formatted: English (Canada)

### FIGURE LEGENDS

**Figure 1.** Summary of evidence search and selection

**Figure 2.** Forest plot of the RCTs investigating the effect of Tree Nuts on Triglycerides. Pooled effect estimates are shown as diamonds, one each for trials conducted in otherwise healthy, dyslipidemia, metabolic syndrome criteria, diabetes and their combination (total). Paired analyses were applied to all crossover trials (1520) and one substudy. Data are expressed as mean differences (MD) with 95% CI, using generic inverse-variance random-effects models. Interstudy heterogeneity was tested by using the Cochrane's Q statistic ( $I^2$ ) at a significance level of  $P < 0.10$  and quantified by  $I^2$ , levels  $\leq 50\%$  represent moderate heterogeneity,  $\geq 50\%$  represent substantial heterogeneity and  $\geq 75\%$ , considerable heterogeneity. TG = Triglycerides, mmol/L = mill moles per liter, A = Almond, AC = Almond + Chocolate, HF = High Fat, LF = Low Fat.

**Figure 3.** Pooled effect estimates are shown as diamonds, one each for trials conducted in otherwise healthy, dyslipidemia, metabolic syndrome criteria, diabetes and their combination (total). Paired analyses were applied to all crossover trials (10) and one substudy. Data are expressed as mean differences (MD) with 95% CI, using generic inverse-variance random-effects models. Interstudy heterogeneity was tested by using the Cochrane's Q statistic ( $I^2$ ) at a significance level of  $P < 0.10$  and quantified by  $I^2$ , levels  $\geq 50\%$  represent substantial heterogeneity and  $\geq 75\%$ , considerable heterogeneity. FBG = Fasting Blood Glucose; mmol/L = mill moles per liter; HF = High Fat; LF = Low Fat.

Formatted: Font: Italic

Formatted: Font: Bold

Figure 1. Summary of evidence search and selection

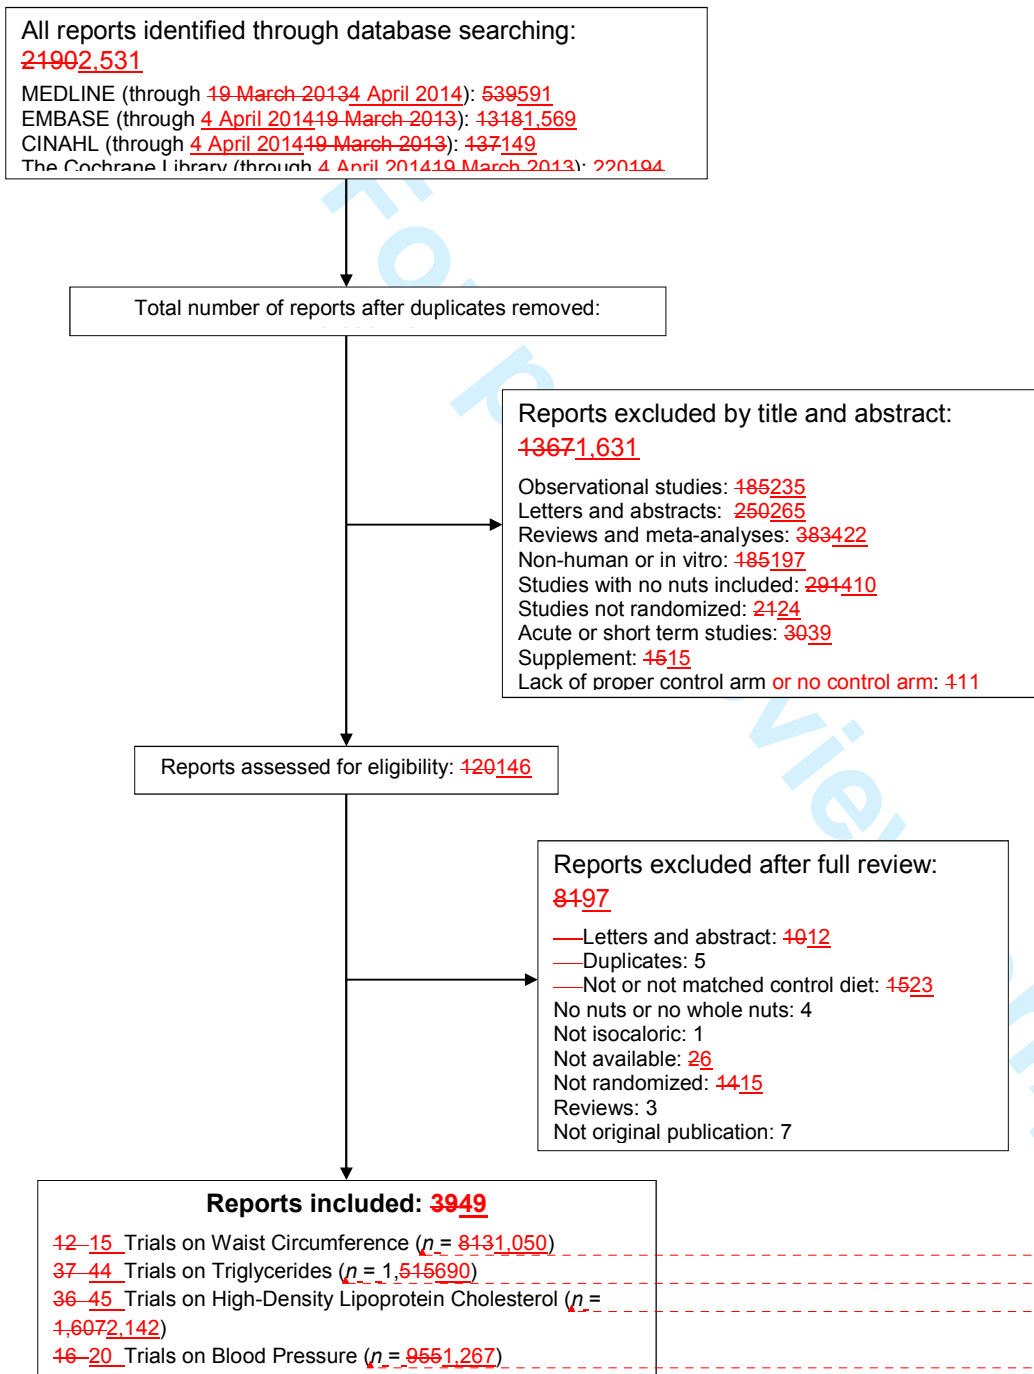

Formatted: Font: (Default) +Body (Calibri)

Formatted: Space After: 0 pt, Line spacing: single

Formatted: Font: Italic

1  
2  
3  
4  
5  
6  
7  
8  
9  
10  
11  
12  
13  
14  
15  
16  
17  
18  
19  
20  
21  
22  
23  
24  
25  
26  
27  
28  
29  
30  
31  
32  
33  
34  
35  
36  
37  
38  
39  
40  
41  
42  
43  
44  
45  
46  
47  
48  
49  
50  
51  
52  
53  
54  
55  
56  
57  
58  
59  
60

Figure 2. Forest plot of the RCTs investigating the effect of Tree Nuts on Triglycerides

For peer review only

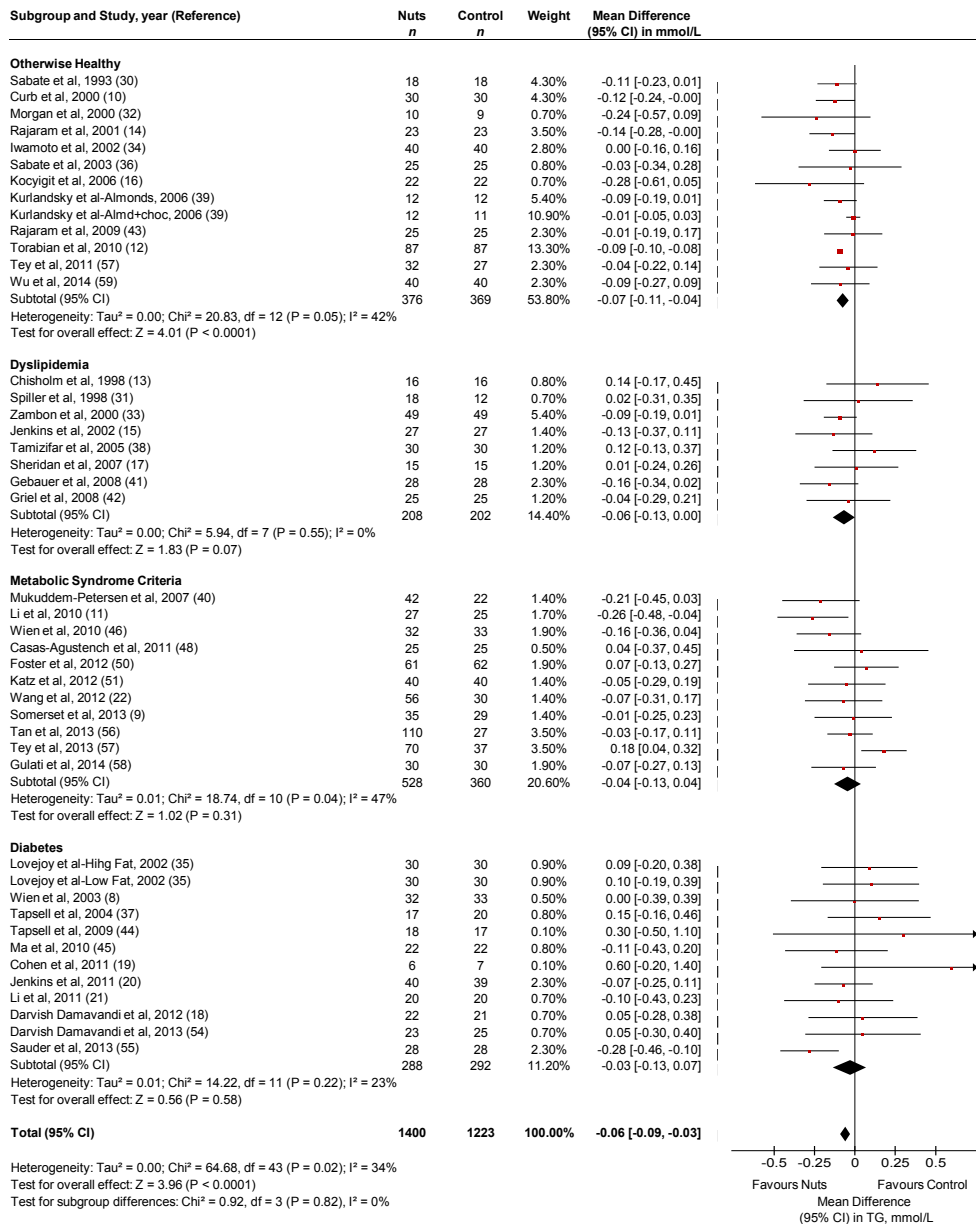

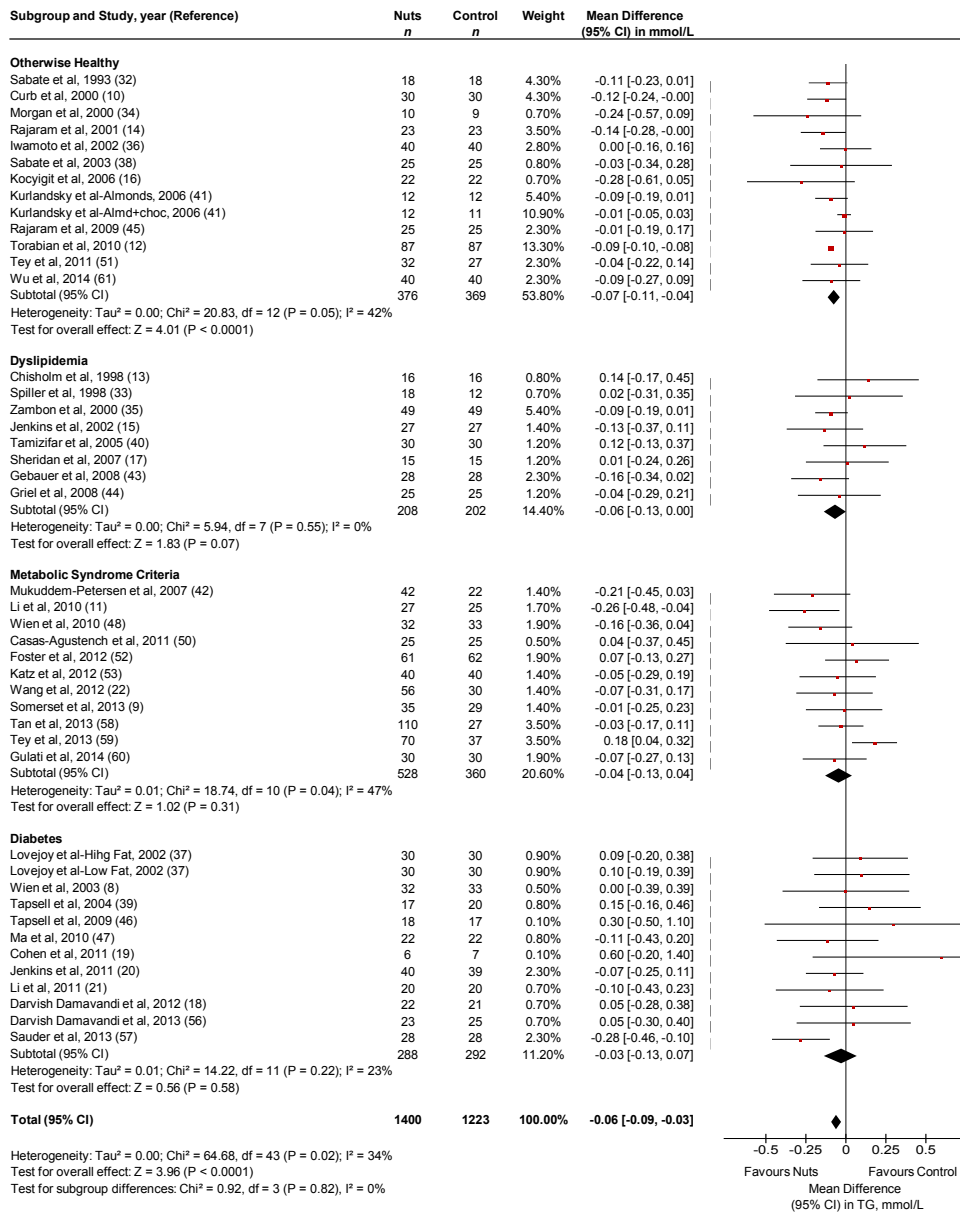



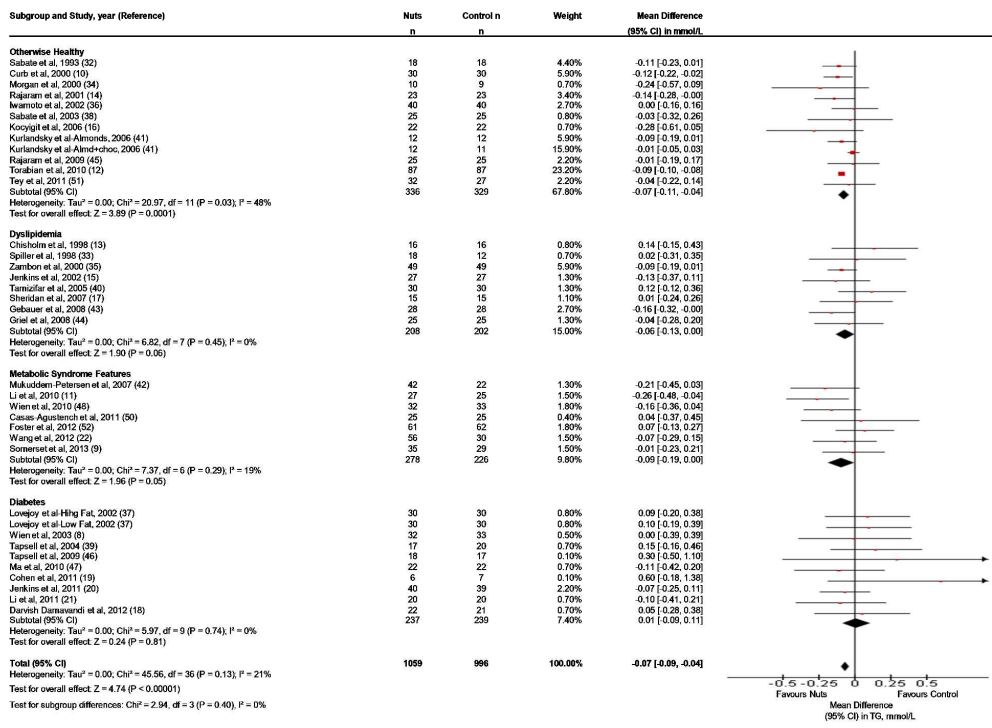

1  
2  
3  
4  
5  
6  
7  
8  
9  
10  
11  
12  
13  
14  
15  
16  
17  
18  
19  
20  
21  
22  
23  
24  
25  
26  
27  
28  
29  
30  
31  
32  
33  
34  
35  
36  
37  
38  
39  
40  
41  
42  
43  
44  
45  
46  
47  
48  
49  
50  
51  
52  
53  
54  
55  
56  
57  
58  
59  
60

For peer review only

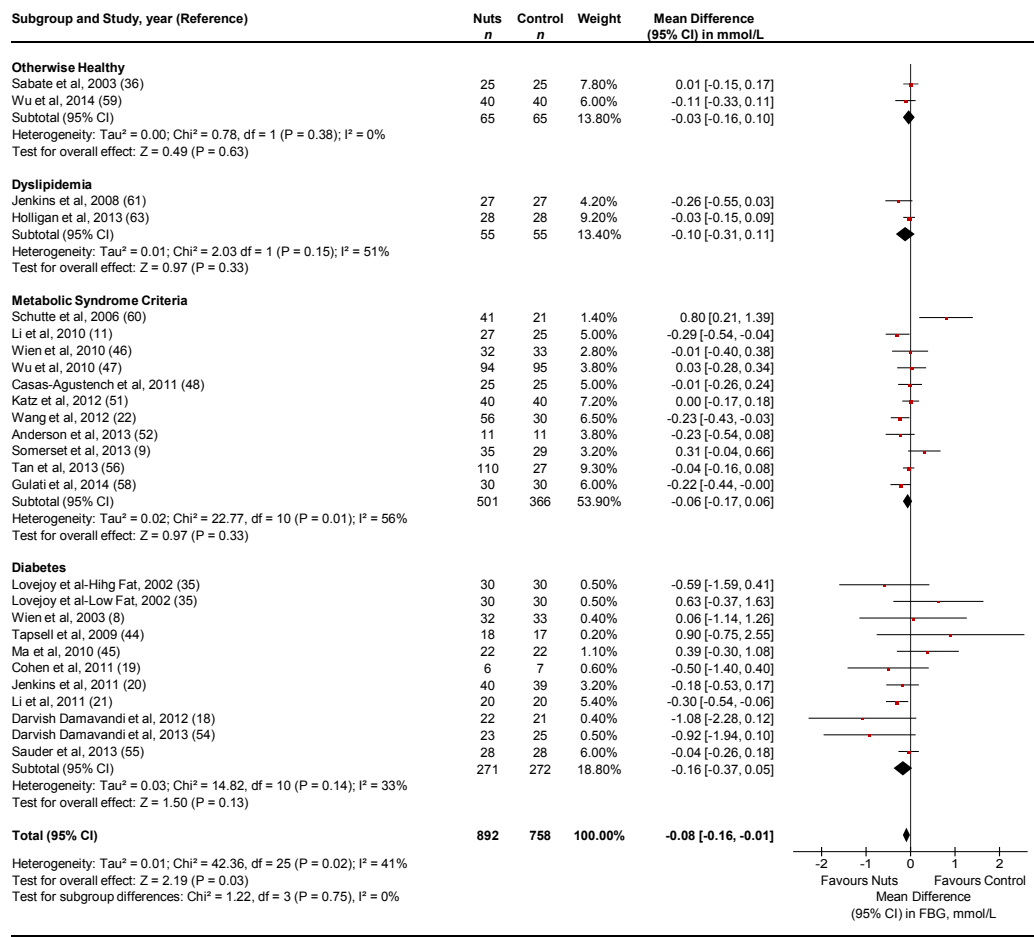

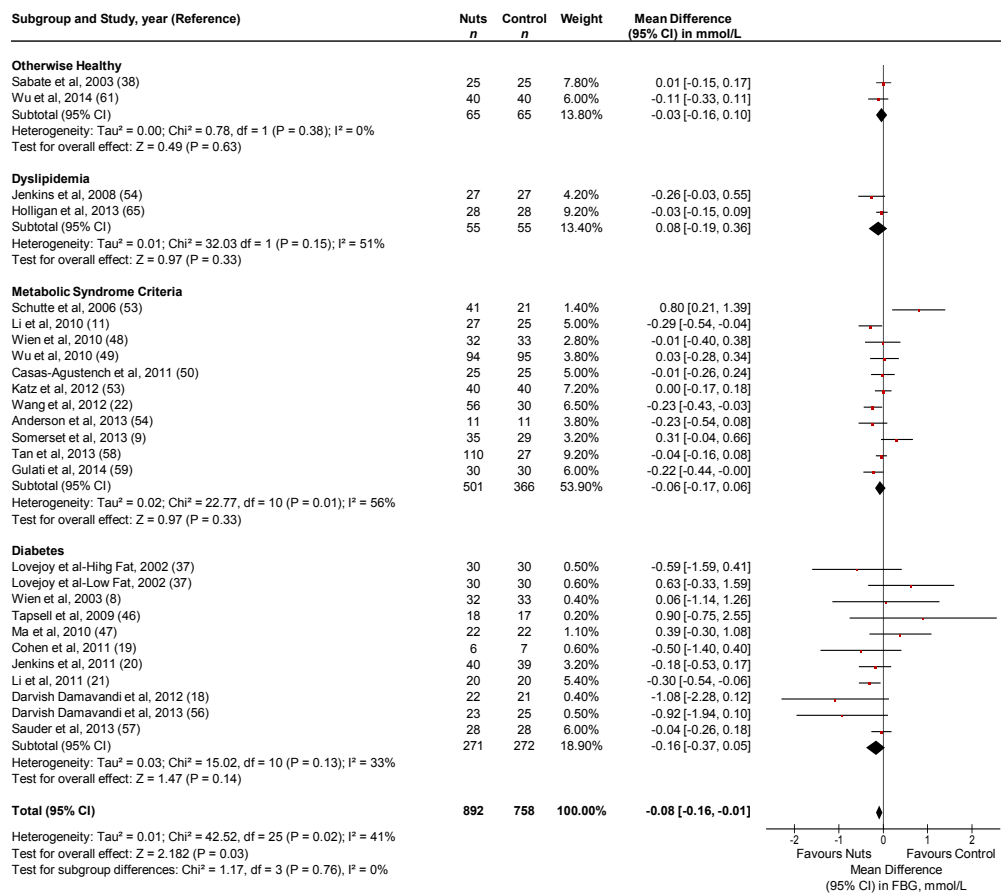

1  
2  
3  
4  
5  
6  
7  
8  
9  
10  
11  
12 **Page 10: [1] Change** **Unknown**

13 Field Code Changed

14  
15  
16 **Page 10: [1] Change** **Unknown**

17 Field Code Changed

18  
19  
20 **Page 10: [1] Change** **Unknown**

21 Field Code Changed

22  
23  
24 **Page 10: [1] Change** **Unknown**

25 Field Code Changed

26  
27  
28 **Page 10: [1] Change** **Unknown**

29 Field Code Changed

30  
31 **Page 10: [2] Formatted** **Sonia Blanco Mejia** **5/13/2014 2:44:00 PM**

32 Font: Italic

33  
34  
35 **Page 10: [2] Formatted** **Sonia Blanco Mejia** **5/13/2014 2:44:00 PM**

36 Font: Italic

37  
38  
39 **Page 10: [2] Formatted** **Sonia Blanco Mejia** **5/13/2014 2:44:00 PM**

40 Font: Italic

41  
42  
43 **Page 10: [2] Formatted** **Sonia Blanco Mejia** **5/13/2014 2:44:00 PM**

44 Font: Italic

45  
46  
47 **Page 10: [2] Formatted** **Sonia Blanco Mejia** **5/13/2014 2:44:00 PM**

48 Font: Italic

49  
50  
51 **Page 10: [3] Change** **Unknown**

52 Field Code Changed

53  
54  
55 **Page 10: [3] Change** **Unknown**

56 Field Code Changed

57  
58  
59 **Page 10: [3] Change** **Unknown**

60 Field Code Changed

For peer review only - <http://bmjopen.bmj.com/site/about/guidelines.xhtml>

**Page 10: [3] Change** **Unknown**

Field Code Changed

1  
2  
3  
4  
5  
6  
7  
8  
9  
10  
11  
12  
13  
14  
15  
16  
17  
18  
19  
20  
21  
22  
23  
24  
25  
26  
27  
28  
29  
30  
31  
32  
33  
34  
35  
36  
37  
38  
39  
40  
41  
42  
43  
44  
45  
46  
47  
48  
49  
50  
51  
52  
53  
54  
55  
56  
57  
58  
59  
60

**Page 10: [3] Change** **Unknown**

Field Code Changed

1  
2  
3  
4  
5  
6  
7  
8  
9  
10  
11  
12 **Page 10: [3] Change** **Unknown**

13 Field Code Changed

14  
15  
16 **Page 10: [3] Change** **Unknown**

17 Field Code Changed

18  
19  
20 **Page 10: [3] Change** **Unknown**

21 Field Code Changed

22  
23  
24 **Page 10: [3] Change** **Unknown**

25 Field Code Changed

26  
27  
28 **Page 10: [3] Change** **Unknown**

29 Field Code Changed

30  
31  
32 **Page 10: [3] Change** **Unknown**

33 Field Code Changed

34  
35  
36 **Page 10: [3] Change** **Unknown**

37 Field Code Changed

38  
39  
40 **Page 10: [3] Change** **Unknown**

41 Field Code Changed

42  
43  
44 **Page 10: [3] Change** **Unknown**

45 Field Code Changed

46  
47  
48 **Page 10: [3] Change** **Unknown**

49 Field Code Changed

50  
51  
52 **Page 10: [3] Change** **Unknown**

53 Field Code Changed

54  
55  
56 **Page 10: [3] Change** **Unknown**

57 Field Code Changed

58  
59  
60 **Page 10: [3] Change** **Unknown**

Field Code Changed

For peer review only - <http://bmjopen.bmj.com/site/about/guidelines.xhtml>

**Page 10: [3] Change** **Unknown**

Field Code Changed



1  
2  
3  
4  
5  
6  
7  
8  
9  
10  
11  
12  
13  
14  
15  
16  
17  
18  
19  
20  
21  
22  
23  
24  
25  
26  
27  
28  
29  
30  
31  
32  
33  
34  
35  
36  
37  
38  
39  
40  
41  
42  
43  
44  
45  
46  
47  
48  
49  
50  
51  
52  
53  
54  
55  
56  
57  
58  
59  
60

**Page 10: [3] Change** **Unknown**

Field Code Changed

1  
2  
3  
4  
5  
6  
7  
8  
9  
10  
11  
12 **Page 10: [3] Change** **Unknown**

13 Field Code Changed

14  
15  
16 **Page 10: [4] Formatted** **Sonia** **5/29/2014 12:23:00 PM**

17 Not Highlight

18  
19  
20 **Page 10: [4] Formatted** **Sonia** **5/29/2014 12:23:00 PM**

21 Not Highlight

22  
23  
24 **Page 10: [4] Formatted** **Sonia** **5/29/2014 12:23:00 PM**

25 Not Highlight

26  
27  
28 **Page 10: [4] Formatted** **Sonia** **5/29/2014 12:23:00 PM**

29 Not Highlight

30  
31  
32 **Page 10: [4] Formatted** **Sonia** **5/29/2014 12:23:00 PM**

33 Not Highlight

34  
35  
36 **Page 10: [4] Formatted** **Sonia** **5/29/2014 12:23:00 PM**

37 Not Highlight

Figure 1. Summary of evidence search and selection

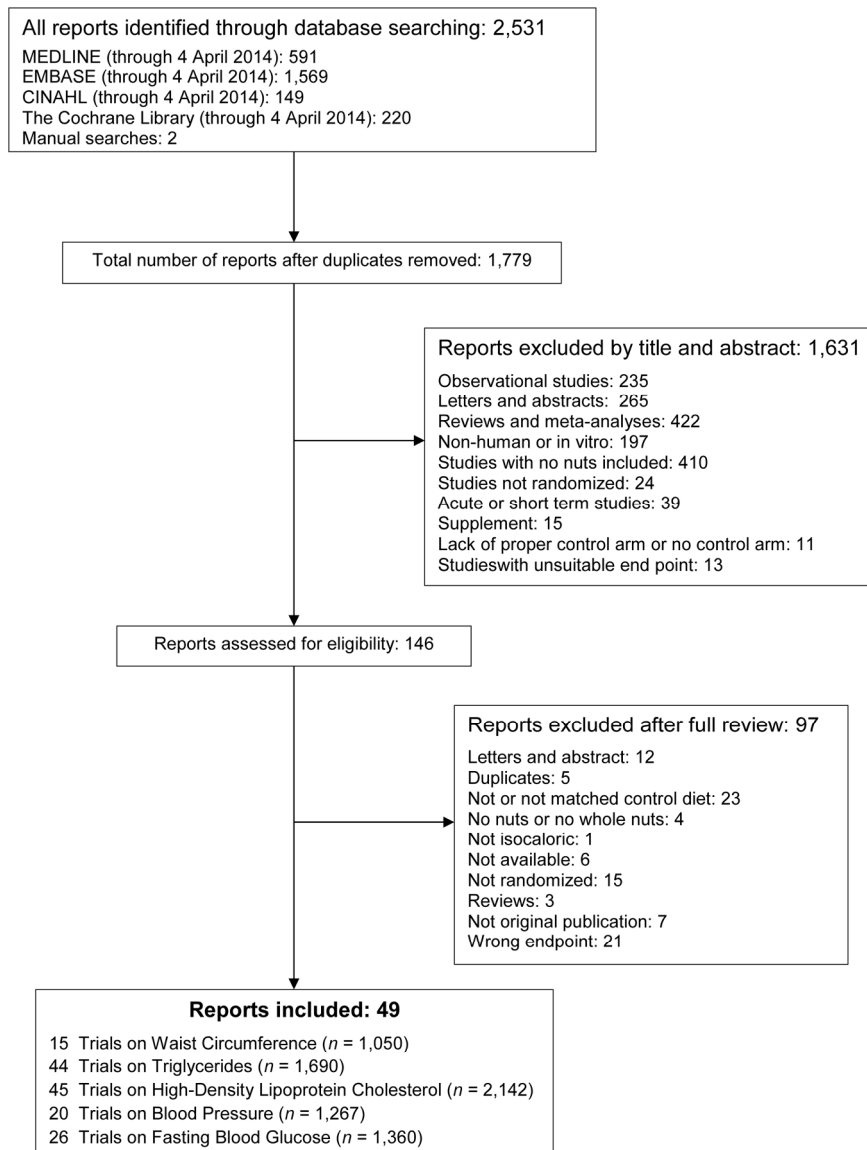

173x226mm (300 x 300 DPI)

Figure 2. Forest plot of the RCTs investigating the effect of Tree Nuts on Triglycerides

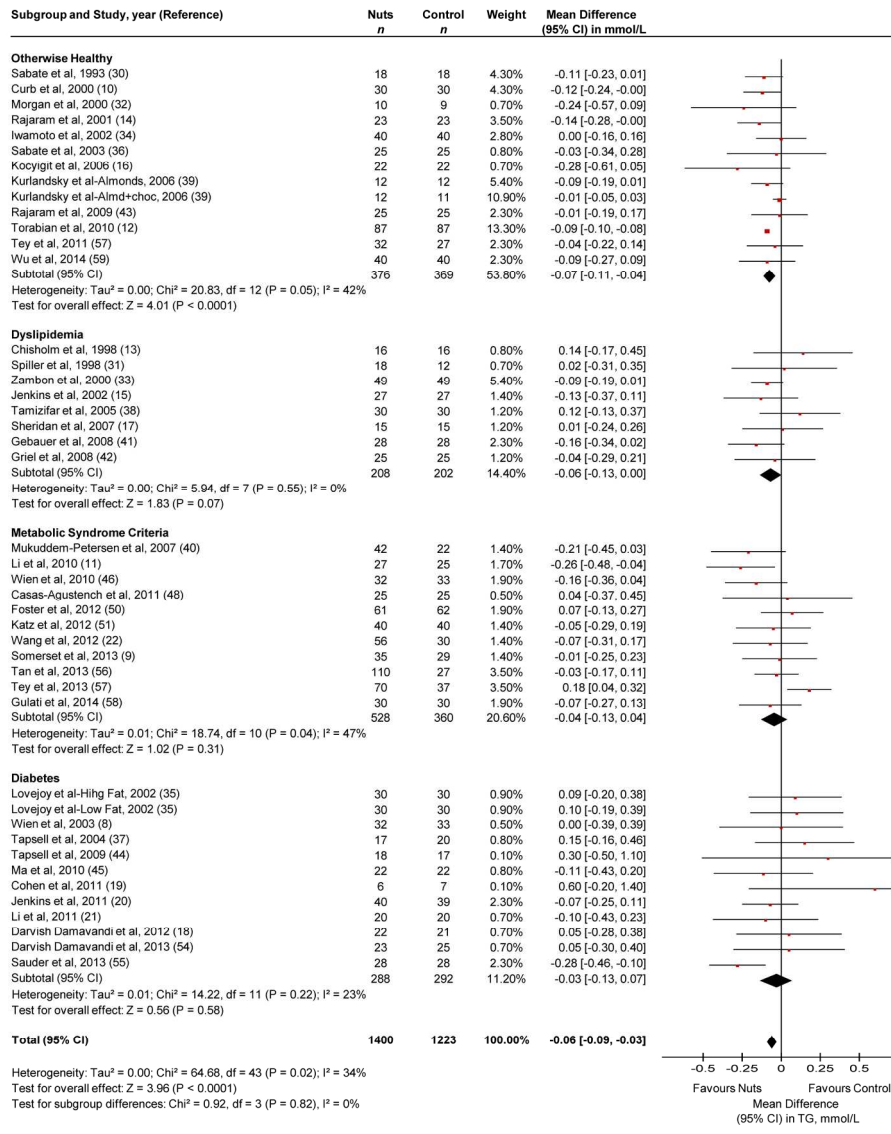

163x212mm (300 x 300 DPI)

Figure 3. Forest plot of the RCTs investigating the effect of Tree Nuts on Fasting Blood Glucose

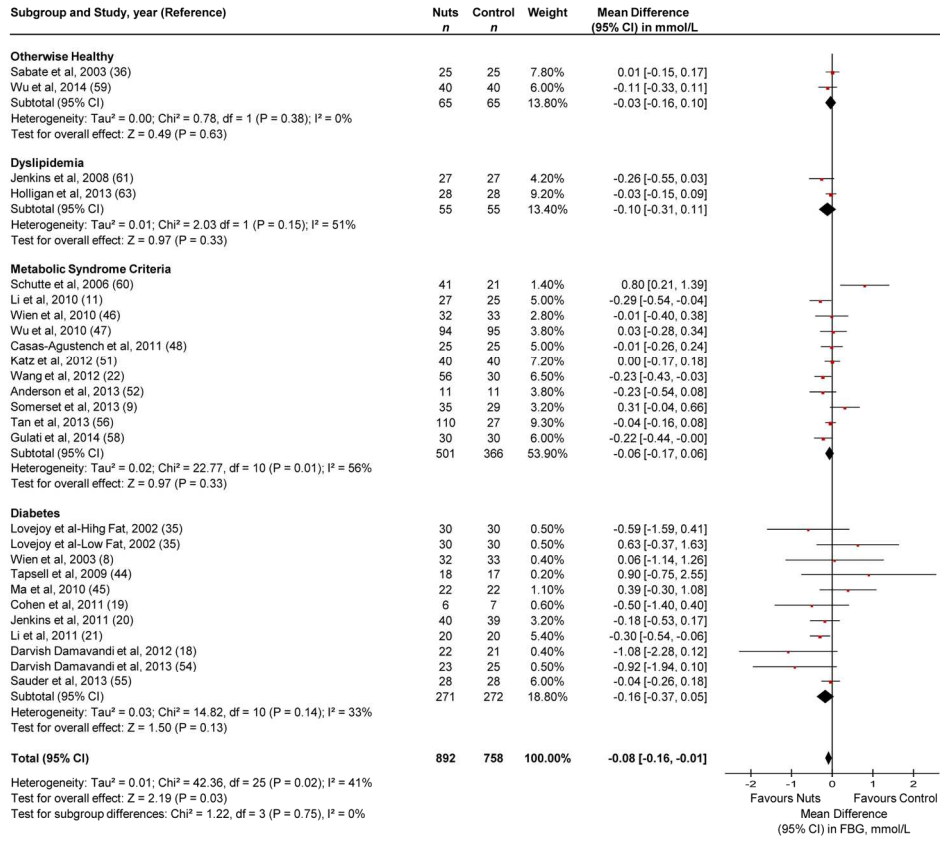

173x163mm (300 x 300 DPI)

only

**Appendix Table 1.** Search Strategy for Studies Assessing the Effect of Tree Nut consumption on Metabolic Syndrome Criteria in RCTs.

| Database | SearchPeriod              | Search                                                                                                                                                                                                                                                                                                                                                                                                                                                                                                                                                                                                                                                                                                                                                                                                                                                                                                                                                                                                                                                                                                                                                                                                                                                                                                                                                                                                                                                                                                                                                                                                                                                                                                                                                |
|----------|---------------------------|-------------------------------------------------------------------------------------------------------------------------------------------------------------------------------------------------------------------------------------------------------------------------------------------------------------------------------------------------------------------------------------------------------------------------------------------------------------------------------------------------------------------------------------------------------------------------------------------------------------------------------------------------------------------------------------------------------------------------------------------------------------------------------------------------------------------------------------------------------------------------------------------------------------------------------------------------------------------------------------------------------------------------------------------------------------------------------------------------------------------------------------------------------------------------------------------------------------------------------------------------------------------------------------------------------------------------------------------------------------------------------------------------------------------------------------------------------------------------------------------------------------------------------------------------------------------------------------------------------------------------------------------------------------------------------------------------------------------------------------------------------|
| MEDLINE  | 1946 to March Week 4 2014 | <ol style="list-style-type: none"> <li>1. exp nut/ Or nuts.mp. Or nut.mp. Or expbertholletia/ Or walnut*.mp. Or expJuglans/ Or almond*.mp. Or expPrunus/ Or pecan*.mp. Or expCarya/ Or pistachio*.mp. Or expPistacia/ Or cashew*.mp. Or expAnacardium/ Or hazelnut*.mp. Or expCorylus/ Or macadamia*.mp. Or exp Macadamia/</li> <li>2. ogtt.mp. Or exp Glucose Tolerance Test/ Or "glucose tolerance test".mp. Or hba1c.mp. Or fructosamine*.mp. Or expFructosamine/ Or insulin*.mp. Or exp Insulin/ Or glycemia*.mp. Or glycaemia*.mp. Or hyperinsulin*.mp. Or expHyperinsulinism/ Or dysglycemia*.mp. Or dysglycaemia*.mp. Or gly* albumin.mp. Or expHemoglobin A, Glycosylated/ Or "blood glucose".mp. Or exp Blood Glucose/ Or hyperglycemia*.mp. Or 39. hyperglycaemia*.mp. Or expHyperglycemia/ Or "homeo* model assessment".mp. Or homa.mp. Or diabetes.mp. Or exp Diabetes Mellitus/</li> <li>3. exp Hypertension/ Or exp Blood Pressure/ Or "systolic blood pressure".mp. Or "diastolic blood pressure".mp. Or hypertension.mp. Or SBP.mp. Or DBP.mp. Or "mean arterial pressure".mp.</li> <li>4. exp Triglycerides/ Or exp Hypertriglyceridemia/ Or hypertriglyceridemia*.mp. Or triglyceride*.mp. Or triacylglycerol*.mp. Or dyslipidemia*.mp. Or dyslipidaemia*.mp. Or exp Dyslipidemias/</li> <li>5. exp Cholesterol, HDL/ Or "high density lipoprotein cholesterol".mp. Or hdl.mp.</li> <li>6. "abdominal obesity".mp. Or exp Obesity, Abdominal/ Or "waist circumference".mp. Or exp waist circumference/ Or "abdominal fat*".mp. Or exp Abdominal Fat/</li> <li>7. exp Insulin Resistance/ Or "metabolic syndrome".mp.</li> <li>8. 1 and (2 or 3 or 4 or 5 or 6 or 7)</li> <li>9. limit 8 to animals†</li> <li>10. 8 not 9</li> </ol> |
| EMBASE   | 1946 to 2014 Week 14      | <ol style="list-style-type: none"> <li>1. exp nut/ Or nuts.mp. Or nut.mp. Or expbertholletia/ Or walnut*.mp. Or expJuglans/ Or almond*.mp. Or expPrunus/ Or pecan*.mp. Or expCarya/ Or pistachio*.mp. Or expPistacia/ Or cashew*.mp. Or expAnacardium/ Or hazelnut*.mp. Or expCorylus/ Or macadamia*.mp. Or exp Macadamia/</li> <li>2. ogtt.mp. Or exp Glucose Tolerance Test/ Or "glucose tolerance test".mp. Or hba1c.mp. Or fructosamine*.mp. Or expFructosamine/ Or insulin*.mp. Or exp Insulin/ Or glycemia*.mp. Or glycaemia*.mp. Or hyperinsulin*.mp. Or expHyperinsulinism/ Or dysglycemia*.mp. Or dysglycaemia*.mp. Or gly* albumin.mp. Or expHemoglobin A, Glycosylated/ Or "blood glucose".mp. Or exp Blood Glucose/ Or hyperglycemia*.mp. Or 39. hyperglycaemia*.mp. Or expHyperglycemia/ Or "homeo* model assessment".mp. Or homa.mp. Or diabetes.mp. Or exp Diabetes Mellitus/</li> <li>3. exp Hypertension/ Or exp Blood Pressure/ Or "systolic blood pressure".mp. Or "diastolic blood pressure".mp. Or hypertension.mp. Or SBP.mp. Or DBP.mp. Or "mean arterial pressure".mp.</li> <li>4. exp Triglycerides/ Or exp Hypertriglyceridemia/ Or hypertriglyceridemia*.mp. Or triglyceride*.mp. Or triacylglycerol*.mp. Or dyslipidemia*.mp. Or dyslipidaemia*.mp. Or exp Dyslipidemias/</li> <li>5. exp Cholesterol, HDL/ Or "high density lipoprotein cholesterol".mp. Or hdl.mp.</li> <li>6. "abdominal obesity".mp. Or exp Obesity, Abdominal/ Or "waist circumference".mp. Or exp waist circumference/ Or "abdominal fat*".mp. Or exp Abdominal Fat/</li> <li>7. exp Insulin Resistance/ Or "metabolic syndrome".mp.</li> <li>8. 1 and (2 or 3 or 4 or 5 or 6 or 7)</li> <li>9. limit 8 to animals†</li> <li>10. 8 not 9</li> </ol> |

|                      |                       |                                                                                                                                                                                                                                                                                                                                                                                                                                                                                                                                                                                                                                                                                                                                                                                                                                                                                                                                                                                                                                                                                                       |
|----------------------|-----------------------|-------------------------------------------------------------------------------------------------------------------------------------------------------------------------------------------------------------------------------------------------------------------------------------------------------------------------------------------------------------------------------------------------------------------------------------------------------------------------------------------------------------------------------------------------------------------------------------------------------------------------------------------------------------------------------------------------------------------------------------------------------------------------------------------------------------------------------------------------------------------------------------------------------------------------------------------------------------------------------------------------------------------------------------------------------------------------------------------------------|
| CINHAL               | 1982 to 4 April 2014  | <ol style="list-style-type: none"> <li>1. (MH "Nuts+") Or "pistachio" Or "hazelnut" Or "macadamia" Or "brazil nut" Or "brazil nuts" Or "pine nut" Or "pine nuts".</li> <li>2. "ogtt" Or (MM "Hemoglobin A, Glycosylated") Or "HbA1c" Or "fructosamine" Or "Insulin" Or "glycemia" Or "hyperinsulin" Or "dysglycemia" Or "gly* albumin" Or "blood glucose" Or "hyperglycemia" Or "homa" Or (MH "Diabetes Mellitus") Or "diabetes mellitus".</li> <li>3. (MH "Hypertension") Or "hypertension" Or "SBP" Or "DBP" Or "mean arterial pressure" Or "MAP".</li> <li>4. "triglycerides" Or "hypertriglyceridemia" Or "TG" Or "TAG" Or "dyslipidemia".</li> <li>5. "HDL" Or (MH "Lipoproteins, HDL Cholesterol") Or "hypercholesterolemia".</li> <li>6. "abdominal obesity" Or "abdominal fat" Or "waist circumference".</li> <li>7. "Insulin resistance" Or "metabolic syndrome".</li> <li>8. 1 and (2 or 3 or 4 or 5 or 6 or 7).</li> </ol>                                                                                                                                                                 |
| The Cochrane Library | Through December 2013 | <ol style="list-style-type: none"> <li>1. nuts.mp. Or nut.mp. Or brazil nut.mp. Or brazil nuts.mp. Or pine nut.mp. Or walnut*.mp. Or almond*.mp. Or pecan*.mp. Or pistachio*.mp. Or cashew*.mp. Or hazelnut*.mp. Or macadamia.mp.</li> <li>2. ogtt.mp. Or hba1c.mp. Or fuctosamine*.mp. Or Insulin*.mp. Or glycemia.mp. Hyperinsulin*.mp. Or dysglycemia.mp. Or gly* albumin.mp. Or exp Blood Glucose/ Or blood glucose.mp. Or expHyperglycemia/ Or homa.mp. Or exp Diabetes Mellitus/ Or diabetes mellitus.mp.</li> <li>3. hypertension.mp. Or /blood pressure.mp. Or systolic blood pressure.mp. Or diastolic blood pressure.mp. Or hypertension.mp. Or SBP.mp. Or DBP.mp. Or mean arterial pressure.mp. Or MAP.mp.</li> <li>4. triglycerides.mp. Or hypertriglyceridemia.mp. Or TG.mp. Or triacylglycerol*.mp. Or TAG.mp. Or dyslipidemia.mp.</li> <li>5. HDL.mp. Or HDL cholesterol.mp. Or hypercholesterolemia.mp.</li> <li>6. abdominal obesity.mp. Or abdominal fat.mp.</li> <li>7. insulin resistance.mp. Or metabolic syndrome.mp.</li> <li>8. 1 and (2 or 3 or 4 or 5 or 6 or 7)</li> </ol> |

\* The symbol at the end of each search term is used in order to capture all possible endings with that word.

Original search date for all databases was May 25<sup>th</sup> 2012; update search dates for all databases were March 19<sup>th</sup> 2013 and April 4<sup>th</sup> 2014.

† Searches were limited to animals and then extracted from the general search.



Appendix Table 2 – Study Quality Assessment by Using the Heyland MQS\*

| Study, Year (Reference)              | Design†             |                |                | Sample‡         |                     |                 | Intervention§  |                        |                  | MQS (n/13) |
|--------------------------------------|---------------------|----------------|----------------|-----------------|---------------------|-----------------|----------------|------------------------|------------------|------------|
|                                      | Randomization (n/2) | Blinding (n/1) | Analysis (n/2) | Selection (n/1) | Comparability (n/1) | Follow-up (n/1) | Protocol (n/1) | Co-interventions (n/2) | Crossovers (n/2) |            |
| 9 Sabate et al, 1993 (32)            | 1                   | 0              | 0              | 1               | 1                   | 0               | 1              | 2                      | 0                | 6          |
| 10 Chisholm et al, 1998 (13)         | 1                   | 0              | 0              | 0               | 1                   | 0               | 0              | 2                      | 0                | 4          |
| 11 Spiller et al, 1998 (33)          | 1                   | 0              | 0              | 1               | 1                   | 0               | 1              | 2                      | 0                | 6          |
| 12 Curb et al, 2000 (10)             | 1                   | 0              | 0              | 0               | 1                   | 0               | 0              | 2                      | 0                | 4          |
| 13 Morgan et al, 2000 (34)           | 1                   | 0              | 0              | 1               | 1                   | 0               | 1              | 2                      | 0                | 6          |
| 14 Zambon et al, 2000 (35)           | 2                   | 0              | 0              | 0               | 1                   | 0               | 1              | 2                      | 0                | 6          |
| 15 Rajaram et al, 2001 (14)          | 2                   | 0              | 0              | 1               | 1                   | 1               | 1              | 2                      | 0                | 8          |
| 16 Iwamoto et al, 2002 (36)          | 1                   | 0              | 2              | 0               | 1                   | 1               | 1              | 2                      | 0                | 8          |
| 17 Jenkins et al, 2002 (15)          | 1                   | 0              | 0              | 1               | 1                   | 0               | 1              | 2                      | 0                | 6          |
| 18 Lovejoy et al, 2002 (37)          | 1                   | 1              | 0              | 0               | 1                   | 0               | 0              | 2                      | 0                | 5          |
| 19 Sabate et al, 2003 (38)           | 1                   | 0              | 0              | 0               | 1                   | 0               | 1              | 2                      | 0                | 5          |
| 20 Wien et al, 2003 (8)              | 2                   | 0              | 2              | 0               | 1                   | 0               | 1              | 2                      | 0                | 8          |
| 21 Tapsell et al, 2004 (39)          | 1                   | 0              | 2              | 1               | 1                   | 0               | 0              | 1                      | 0                | 6          |
| 22 Tamizifar et al, 2005 (40)        | 1                   | 0              | 0              | 0               | 1                   | 0               | 1              | 2                      | 0                | 5          |
| 23 Kocyigit et al, 2006 (16)         | 1                   | 0              | 2              | 0               | 1                   | 1               | 1              | 2                      | 0                | 8          |
| 24 Kurlandsky et al, 2006 (41)       | 1                   | 0              | 0              | 0               | 1                   | 0               | 1              | 2                      | 0                | 5          |
| 25 Schutte et al, 2006 (53)          | 2                   | 0              | 0              | 1               | 1                   | 0               | 1              | 2                      | 0                | 7          |
| 26 Mukuddem-Petersen et al, 2007(42) | 2                   | 0              | 0              | 1               | 1                   | 0               | 1              | 2                      | 0                | 7          |
| 27 Sheridan et al, 2007 (17)         | 1                   | 0              | 0              | 1               | 1                   | 0               | 1              | 2                      | 0                | 6          |
| 28 Gebauer et al, 2008 (43)          | 1                   | 0              | 0              | 1               | 1                   | 0               | 1              | 1                      | 0                | 5          |
| 29 Griel et al, 2008 (44)            | 1                   | 0              | 2              | 0               | 1                   | 1               | 1              | 2                      | 0                | 8          |
| 30 Jenkins et al, 2008 (54)          | 1                   | 0              | 0              | 1               | 1                   | 0               | 1              | 2                      | 0                | 6          |
| 31 Rajaram et al, 2009 (45)          | 1                   | 0              | 0              | 1               | 1                   | 0               | 0              | 2                      | 0                | 5          |
| 32 Tapsell et al, 2009 (46)          | 2                   | 0              | 0              | 1               | 1                   | 0               | 1              | 2                      | 0                | 7          |
| 33 Li et al, 2010 (11)               | 2                   | 0              | 0              | 1               | 1                   | 0               | 1              | 2                      | 0                | 7          |
| 34 Ma et al, 2010 (47)               | 1                   | 0              | 0              | 1               | 1                   | 0               | 1              | 1                      | 0                | 5          |
| 35 Torabian et al, 2010 (12)         | 1                   | 0              | 0              | 1               | 1                   | 0               | 1              | 2                      | 0                | 6          |
| 36 Wien et al, 2010 (48)             | 2                   | 0              | 2              | 1               | 1                   | 0               | 1              | 2                      | 0                | 9          |
| 37 Wu et al, 2010 (49)               | 2                   | 0              | 2              | 1               | 1                   | 0               | 1              | 2                      | 0                | 9          |
| 38 Casas-Agustench et al, 2011 (50)  | 1                   | 0              | 0              | 1               | 1                   | 0               | 1              | 2                      | 0                | 6          |
| 39 Cohen et al, 2011 (19)            | 1                   | 0              | 2              | 0               | 1                   | 1               | 0              | 2                      | 0                | 7          |
| 40 Jenkins et al, 2011 (20)          | 1                   | 0              | 2              | 1               | 1                   | 0               | 1              | 2                      | 0                | 8          |
| 41 Li et al, 2011 (21)               | 1                   | 0              | 0              | 0               | 1                   | 0               | 1              | 2                      | 0                | 5          |
| 42 Tey et al, 2011 (51)              | 2                   | 0              | 2              | 1               | 1                   | 0               | 1              | 2                      | 0                | 9          |
| 43 DarvishDamavandi et al, 2012 (18) | 1                   | 0              | 0              | 0               | 0                   | 0               | 1              | 1                      | 0                | 3          |

|    |                                    |   |   |   |   |   |   |   |   |   |   |
|----|------------------------------------|---|---|---|---|---|---|---|---|---|---|
|    | Foster et al, 2012 (52)            | 2 | 0 | 2 | 0 | 1 | 1 | 1 | 2 | 0 | 9 |
| 1  | Katz et al, 2012 (53)              | 1 | 0 | 2 | 1 | 1 | 0 | 1 | 1 | 0 | 7 |
| 2  | Wang et al, 2012 (22)              | 1 | 0 | 0 | 0 | 1 | 0 | 1 | 2 | 0 | 5 |
| 3  | West et al, 2012 (55)              | 1 | 0 | 0 | 1 | 1 | 0 | 1 | 1 | 0 | 5 |
| 4  | Anderson et al, 2013 (54)          | 1 | 0 | 2 | 0 | 1 | 1 | 0 | 0 | 0 | 5 |
| 5  | Darvish Damavandi et al, 2013 (56) | 2 | 0 | 0 | 0 | 1 | 0 | 1 | 2 | 0 | 6 |
| 6  | Somerset et al, 2013 (9)           | 1 | 0 | 2 | 1 | 1 | 1 | 1 | 2 | 0 | 9 |
| 7  | Tan et al, 2013 (58)               | 1 | 0 | 0 | 0 | 1 | 0 | 1 | 2 | 0 | 5 |
| 8  | Tey et al, 2013 (59)               | 1 | 0 | 0 | 1 | 1 | 0 | 1 | 2 | 0 | 6 |
| 9  | Gulati et al, 2014 (60)            | 1 | 0 | 0 | 0 | 1 | 0 | 0 | 2 | 0 | 4 |
| 10 | Wu et al, 2014 (61)                | 2 | 0 | 0 | 1 | 1 | 0 | 1 | 2 | 0 | 7 |

11 MQS=Heyland Methodological Quality Score; n/ = total score per category and total MQS score.

12 \* The Heyland MQS assigns a score of 0 or 1 or from 0 to 2 over 9 categories of quality related to study design, sampling procedures, and  
 13 interventions, for a total of 13 points. Trials that scored  $\geq 8$  were considered to be of higher quality (11). Trials reported in abstract form were not  
 14 included in the MQS scores (Berryman et al, 2013, Holligan et al, 2013 and Sauder et al, 2013).

15 † Randomization was scored 2 points for being randomized with the methods described, 1 point for being randomized without the methods  
 16 described, or 0 points for being neither randomized nor having the methods described. Blinding was scored 1 point for being double-blind or 0 points  
 17 for "other." Analysis was scored 2 points for being intention-to-treat; all other types of analyses scored 0 points.

18 ‡ Sample selection was scored 1 point for being consecutive eligible or 0 points for being preselected or indeterminate. Sample comparability was  
 19 scored 1 point for being comparable or 0 points for not being comparable at baseline. Follow-up was scored 1 point for being 100% or 0 points for  
 20 <100%.

21 § Treatment protocol was scored 1 point for being reproducibly described or 0 points for being poorly described. Co-interventions were scored 2  
 22 points for being described and equal, 1 point for being described but unequal or indeterminate, or 0 points for not being described. Treatment  
 23 crossovers (where participants were switched from the control treatment to the experimental treatment) were scored 2 points for being <10%, 1 point  
 24 for being >10%, and 0 points for not being described.

25

26

27

28

29

30

31

32

33

34

35

36

37

38

39

40

41

42

43

44

45

46

47

48

49

Appendix Table 3. A priori subgroup analyses of continuous variables for criteria of the Metabolic Syndrome

| A. Waist Circumference                    |               |      |                        |                             |         | D. Systolic Blood Pressure                |               |      |                         |                             |         |
|-------------------------------------------|---------------|------|------------------------|-----------------------------|---------|-------------------------------------------|---------------|------|-------------------------|-----------------------------|---------|
| Subgroups                                 | No. of Trials | N    | $\beta$ [95% CI]       | Residual I <sup>2</sup> (%) | P-value | Subgroups                                 | No. of Trials | N    | $\beta$ [95% CI]        | Residual I <sup>2</sup> (%) | P-value |
| Nuts Dose (g/day)                         | 15            | 1050 | -0.028 [-0.104, 0.048] | 66.4                        | 0.44    | Nuts Dose (g/day)                         | 20            | 1267 | -0.085 [-0.186, 0.017]  | 62.6                        | 0.10    |
| Duration (weeks)                          | 15            | 1050 | -0.152 [-0.347, 0.043] | 60.4                        | 0.12    | Duration (weeks)                          | 20            | 1267 | -0.043 [-0.166, 0.080]  | 64.4                        | 0.47    |
| Saturated Fat (%)                         | 13            | 904  | 0.259 [-0.262, 0.781]  | 69.2                        | 0.30    | Saturated Fat (%)                         | 18            | 1058 | 0.505 [-0.177, 1.186]   | 64                          | 0.14    |
| Change in Saturated Fat (%)               | 10            | 777  | 0.374 [-1.448, 2.195]  | 65                          | 0.65    | Change in Saturated Fat (%)               | 13            | 803  | -0.249 [-1.151, 0.653]  | 49.6                        | 0.56    |
| Difference in Saturated Fat (%)           | 13            | 904  | 0.662 [-1.011, 2.336]  | 71.4                        | 0.40    | Difference in Saturated Fat (%)           | 18            | 1058 | -1.307 [-2.681, 0.067]  | 59.8                        | 0.06    |
| Fibre intake (g/day)                      | 12            | 882  | -0.059 [-0.357, 0.238] | 73.4                        | 0.67    | Fibre intake (g/day)                      | 17            | 1036 | -0.187 [-0.470, 0.097]  | 57                          | 0.18    |
| Change in Fibre intake (g/day)            | 8             | 688  | 0.020 [-0.430, 0.470]  | 71.6                        | 0.92    | Change in Fibre intake (g/day)            | 10            | 765  | -0.071 [-0.382, 0.241]  | 55.1                        | 0.62    |
| Difference in Fibre intake (g/day)        | 13            | 904  | -0.124 [-0.394, 0.145] | 70.8                        | 0.33    | Difference in Fibre intake (g/day)        | 18            | 1058 | -0.353 [-0.695, -0.011] | 55.2                        | 0.04    |
| Baseline (cm)                             | 11            | 803  | -0.014 [-0.082, 0.055] | 73.7                        | 0.66    | Baseline (mmHg)                           | 16            | 1058 | -0.112 [-0.398, 0.174]  | 69.6                        | 0.42    |
| Difference in Carbohydrate intake (%/day) | 14            | 964  | -0.874 [-0.377, 2.124] | 49.7                        | 0.01    | Difference in Carbohydrate intake (%/day) | 18            | 1058 | 0.564 [0.164, 0.963]    | 55.5                        | 0.00    |

  

| B. Triglycerides                          |               |      |                        |                             |         | E. Diastolic Blood Pressure               |               |      |                        |                             |         |
|-------------------------------------------|---------------|------|------------------------|-----------------------------|---------|-------------------------------------------|---------------|------|------------------------|-----------------------------|---------|
| Subgroups                                 | No. of Trials | N    | $\beta$ [95% CI]       | Residual I <sup>2</sup> (%) | P-value | Subgroups                                 | No. of Trials | N    | $\beta$ [95% CI]       | Residual I <sup>2</sup> (%) | P-value |
| Nuts Dose (g/day)                         | 44            | 1962 | -0.002 [-0.004, 0.001] | 39.9                        | 0.05    | Nuts Dose (g/day)                         | 20            | 1267 | -0.028 [-0.067, 0.011] | 29.6                        | 0.15    |
| Duration (weeks)                          | 44            | 1962 | 0.002 [-0.001, 0.005]  | 35.5                        | 0.11    | Duration (weeks)                          | 20            | 1267 | 0.012 [-0.040, 0.064]  | 36.1                        | 0.63    |
| Saturated Fat (%)                         | 38            | 1541 | 0.012 [-0.001, 0.026]  | 11.9                        | 0.08    | Saturated Fat (%)                         | 18            | 1058 | 0.118 [-0.154, 0.390]  | 36.6                        | 0.37    |
| Change in Saturated Fat (%)               | 21            | 1076 | 0.023 [-0.010, 0.005]  | 33.1                        | 0.16    | Change in Saturated Fat (%)               | 13            | 803  | -0.152 [-0.595, 0.291] | 27.4                        | 0.47    |
| Difference in Saturated Fat (%)           | 38            | 1541 | 0.005 [-0.013, 0.022]  | 20.8                        | 0.60    | Difference in Saturated Fat (%)           | 18            | 1058 | -0.136 [-0.694, 0.423] | 40.6                        | 0.61    |
| Fibre intake (g/day)                      | 33            | 1353 | -0.005 [-0.012, 0.002] | 19.7                        | 0.14    | Fibre intake (g/day)                      | 17            | 1036 | -0.067 [-0.173, 0.040] | 21.3                        | 0.20    |
| Change in Fibre intake (g/day)            | 17            | 865  | -0.009 [-0.020, 0.002] | 42.1                        | 0.11    | Change in Fibre intake (g/day)            | 10            | 765  | 0.021 [-0.147, 0.189]  | 46.4                        | 0.78    |
| Difference in Fibre intake (g/day)        | 34            | 1408 | -0.001 [-0.010, 0.009] | 24.9                        | 0.94    | Difference in Fibre intake (g/day)        | 18            | 1058 | -0.078 [-0.230, 0.074] | 37.9                        | 0.29    |
| Baseline (mmol/L)                         | 35            | 1550 | 0.080 [-0.020, 0.180]  | 33.9                        | 0.11    | Baseline (mmHg)                           | 16            | 1058 | -0.009 [-0.220, 0.202] | 45.3                        | 0.93    |
| Difference in Carbohydrate intake (%/day) | 39            | 1609 | 0.003 [-0.007, 0.012]  | 25.0                        | 0.56    | Difference in Carbohydrate intake (%/day) | 18            | 1058 | 0.088 [-0.071, 0.247]  | 39.5                        | 0.26    |

  

| C. High-Density Lipoprotein Cholesterol   |               |      |                        |                             |         | F. Fasting Blood Glucose                  |               |      |                        |                             |         |
|-------------------------------------------|---------------|------|------------------------|-----------------------------|---------|-------------------------------------------|---------------|------|------------------------|-----------------------------|---------|
| Subgroups                                 | No. of Trials | N    | $\beta$ [95% CI]       | Residual I <sup>2</sup> (%) | P-value | Subgroups                                 | No. of Trials | N    | $\beta$ [95% CI]       | Residual I <sup>2</sup> (%) | P-value |
| Nuts Dose (g/day)                         | 45            | 2127 | -0.001 [-0.002, 0.001] | 85.8                        | 0.42    | Nuts Dose (g/day)                         | 26            | 1319 | 0.004 [-0.002, 0.011]  | 44.5                        | 0.19    |
| Duration (weeks)                          | 45            | 2127 | 0.000 [-0.002, 0.002]  | 85.8                        | 0.93    | Duration (weeks)                          | 26            | 1319 | -0.006 [-0.021, 0.008] | 44.6                        | 0.36    |
| Saturated Fat (%)                         | 39            | 1730 | 0.000 [-0.010, 0.010]  | 84.6                        | 0.99    | Saturated Fat (%)                         | 21            | 1097 | 0.006 [-0.029, 0.042]  | 42.5                        | 0.71    |
| Change in Saturated Fat (%)               | 22            | 1265 | 0.005 [-0.013, 0.022]  | 84.1                        | 0.57    | Change in Saturated Fat (%)               | 12            | 895  | -0.003 [-0.068, 0.062] | 48.3                        | 0.92    |
| Difference in Saturated Fat (%)           | 39            | 1730 | 0.000 [-0.008, 0.008]  | 83.2                        | 0.93    | Difference in Saturated Fat (%)           | 21            | 1097 | -0.036 [-0.133, 0.062] | 41.2                        | 0.45    |
| Fibre intake (g/day)                      | 34            | 1542 | -0.001 [-0.005, 0.004] | 88.4                        | 0.76    | Fibre intake (g/day)                      | 19            | 1040 | 0.003 [-0.008, 0.014]  | 43.7                        | 0.59    |
| Change in Fibre intake (g/day)            | 18            | 1054 | 0.001 [-0.006, 0.007]  | 87.5                        | 0.83    | Change in Fibre intake (g/day)            | 10            | 731  | 0.001 [-0.012, 0.015]  | 22.3                        | 0.82    |
| Difference in Fibre intake (g/day)        | 35            | 1597 | 0.003 [-0.002, 0.007]  | 86.1                        | 0.30    | Difference in Fibre intake (g/day)        | 20            | 1062 | 0.006 [-0.014, 0.026]  | 42.8                        | 0.56    |
| Baseline (mmol/L)                         | 37            | 1692 | 0.022 [-0.093, 0.137]  | 87.1                        | 0.70    | Baseline (mmol/L)                         | 24            | 1251 | -0.059 [-0.149, 0.031] | 45.7                        | 0.19    |
| Difference in Carbohydrate intake (%/day) | 40            | 1798 | 0.000 [-0.005, 0.005]  | 82.2                        | 0.89    | Difference in Carbohydrate intake (%/day) | 23            | 1209 | 0.026 [-0.007, 0.058]  | 41.1                        | 0.12    |

N: number of participants in each subgroup.

Residual I<sup>2</sup> was reported as a percent value, where I<sup>2</sup> ≤ 50% indicated "moderate" heterogeneity, I<sup>2</sup> > 50% indicated "substantial" heterogeneity and ≥ 75% indicated "considerable" heterogeneity. P-value significance for heterogeneity was set as P < 0.10.

Peer review only

1  
2  
3  
4  
5  
6  
7  
8  
9  
10  
11  
12  
13  
14  
15  
16  
17  
18  
19  
20  
21  
22  
23  
24  
25  
26  
27  
28  
29  
30  
31  
32  
33  
34  
35  
36  
37  
38  
39  
40  
41  
42  
43  
44  
45  
46  
47  
48  
49  
50  
51  
52  
53  
54  
55  
56  
57  
58  
59  
60

**Appendix Figure 1.** Cochrane risk of bias.

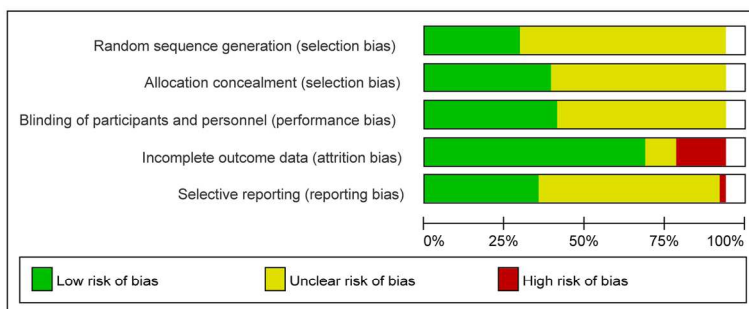

Review authors' judgements about each risk of bias item presented as percentages across all included studies.

194x82mm (300 x 300 DPI)

Peer review only

Appendix Figure 2. Forest plot of the RCTs of the effect of Tree Nuts on Waist Circumference

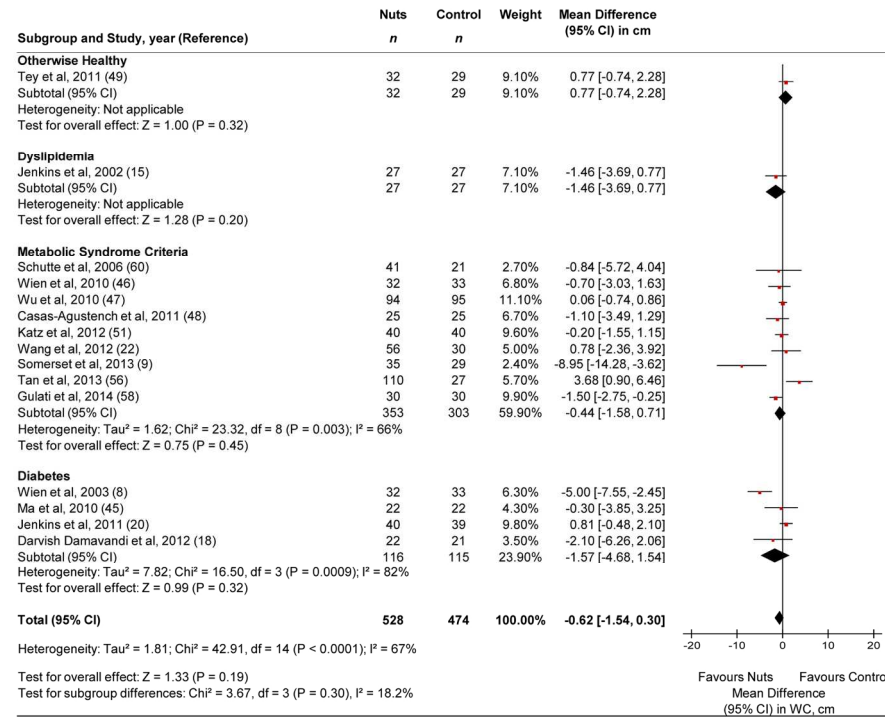

Pooled effect estimates are shown as diamonds, one each for trials conducted in otherwise healthy, dyslipidemia, metabolic syndrome criteria, diabetes and their combination (total). Paired analyses were applied to all crossover trials (3). Data are expressed as mean differences (MD) with 95% CI, using generic inverse-variance random-effects models. Interstudy heterogeneity was tested by using the Cochrane's Q statistic ( $I^2$ ) at a significance level of  $P < 0.10$  and quantified by  $I^2$ , levels  $\leq 50\%$  represent moderate heterogeneity,  $\geq 50\%$  represent substantial heterogeneity and  $\geq 75\%$ , considerable heterogeneity. WC = waist circumference, cm = centimeters.

173x176mm (300 x 300 DPI)

Appendix Figure 3. Forest plot of subgroup analyses for categorical variables for Waist Circumference

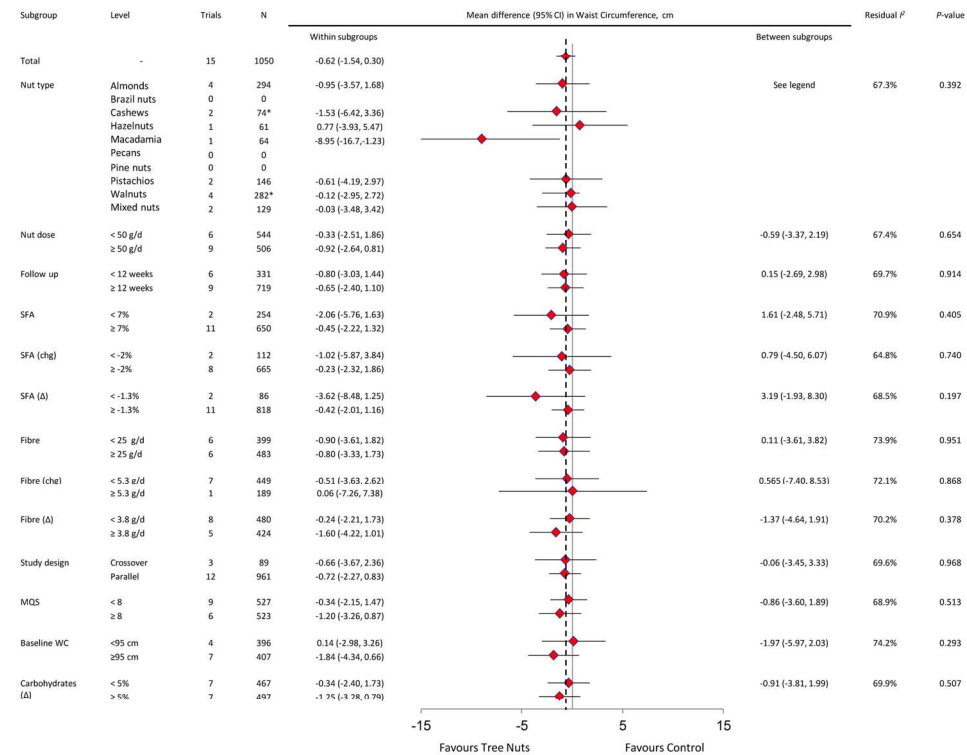

Point estimates for each subgroup level are the pooled effect estimates and are represented by diamonds. The dashed line represents the pooled effect estimate for the overall analysis. The residual I<sup>2</sup> value indicates the interstudy heterogeneity unexplained by the subgrouping. Pairwise between-subgroup mean differences (95% CIs) for nut type are not shown due to lack of statistical significance between groups. SFA = Saturated Fatty Acids, SFA (chg) = change within treatment diet for SFA, SFA (Δ) = difference between groups for SFA, Fibre (chg) = change within treatment diet for Fibre, Fibre (Δ) = difference between groups for SFA, MQS = Heyland Methodological Quality Score, WC = waist circumference, Carbohydrates (Δ) = difference between groups for carbohydrates.

\* Both nut types were studied within the same trial, for the sole purposes of number of participants, the control group was divided in half.

† Statistically significant pairwise subgroup effect modification by meta-regression analysis ( $P < 0.05$ )

173x203mm (300 x 300 DPI)

Appendix Figure 4. Forest plot of subgroup analyses for categorical variables for Triglycerides.

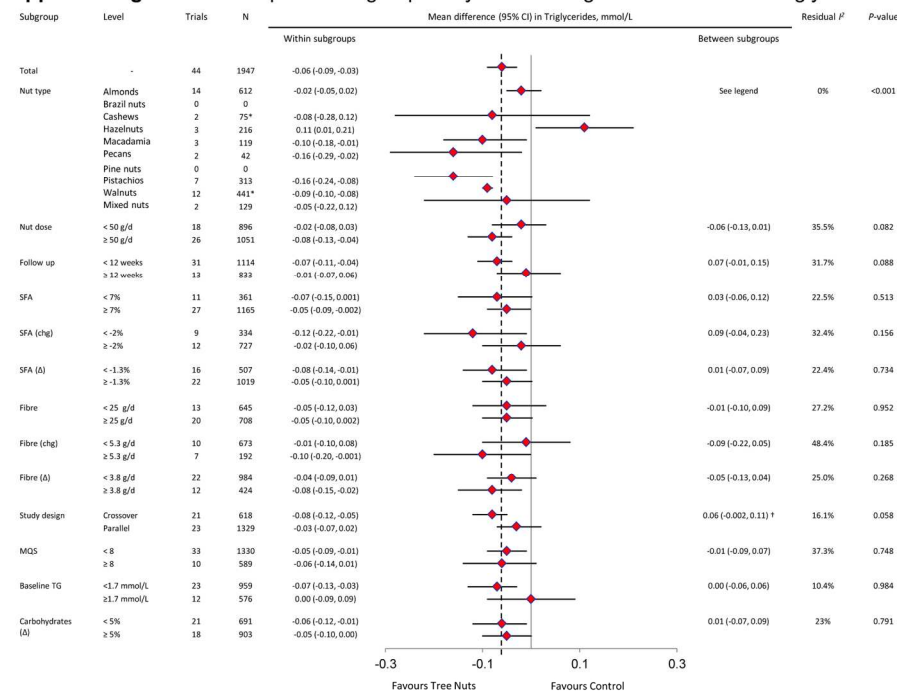

Point estimates within each subgroup level are the pooled effect estimates and are represented by diamonds. The dashed line represents the pooled effect estimate for the overall analysis. The residual I<sup>2</sup> value indicates the interstudy heterogeneity unexplained by the subgrouping. Significant pairwise between-subgroup mean differences (95% CIs) for nut types as follows: almonds vs. walnuts -0.07 mmol/L (-0.11, -0.04 mmol/L)†, almonds vs. pistachio -0.14 mmol/L (-0.23, -0.05 mmol/L)†, almonds vs. pecan -0.14 mmol/L (-0.27, -0.001 mmol/L)†, almonds vs. hazelnuts 0.13 mmol/L (0.02, 0.23 mmol/L)†, walnuts vs. hazelnuts -0.20 mmol/L (-0.30, -0.10 mmol/L)†, macadamia vs. hazelnuts -0.20 mmol/L (-0.33, -0.07 mmol/L)†, pistachio vs. hazelnuts -0.27 mmol/L (-0.40, -0.14 mmol/L)†, pecan vs. hazelnut -0.26 mmol/L (-0.43, -0.10 mmol/L)†, all others non-significant (P > 0.05). SFA = Saturated Fatty Acids, SFA (chg) = change within treatment diet for SFA, SFA (Δ) = difference between groups for SFA, Fibre (chg) = change within treatment diet for Fibre, Fiber (Δ) = difference between groups for SFA, MQS = Heyland Methodological Quality Score, TG = Triglycerides.

\* Both nut types were studied within the same trial, for the sole purposes of number of participants, the control group was divided in half.

† Statistically significant pairwise subgroup effect modification by meta-regression analysis (P < 0.05)

173x205mm (300 x 300 DPI)



Appendix Figure 5. Forest plot of the RCTs investigating the effect of Tree Nuts on HDL-C.

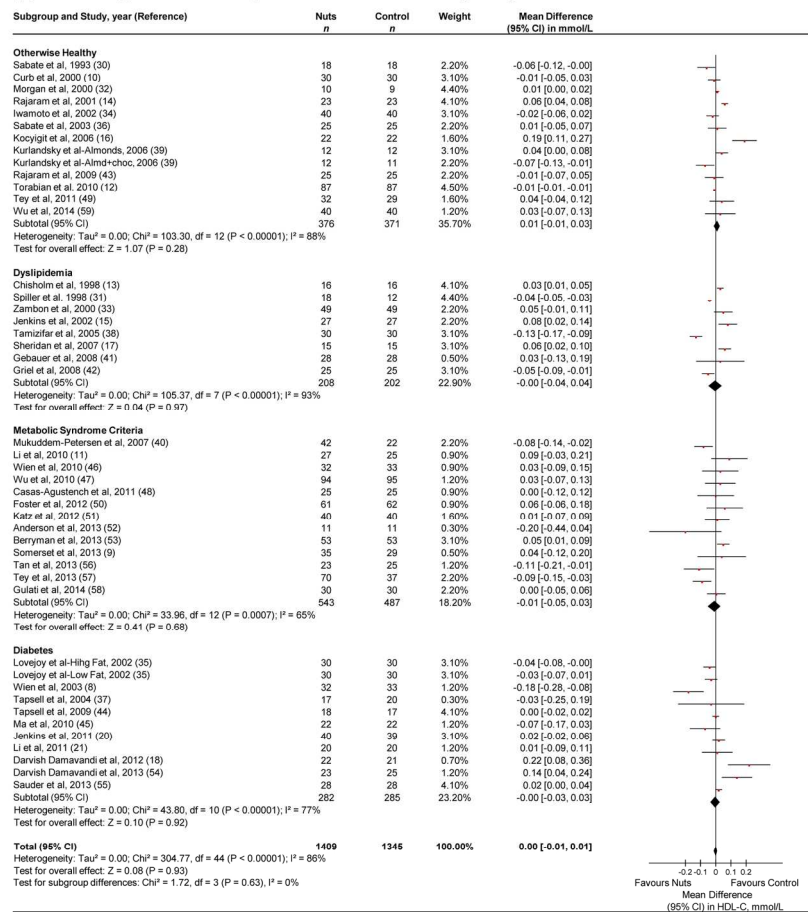

Pooled effect estimates are shown as diamonds, one each for trials conducted in otherwise healthy, dyslipidemia, metabolic syndrome criteria, diabetes and their combination (total). Paired analyses were applied to all crossover trials (21) and one substudy. Data are expressed as mean differences (MD) with 95% CI, using generic inverse-variance random-effects models. Interstudy heterogeneity was tested by using the Cochrane's Q statistic ( $I^2$ ) at a significance level of  $P < 0.10$  and quantified by  $I^2$ , levels  $\leq 50\%$  represent moderate heterogeneity,  $\geq 50\%$  represent substantial heterogeneity and  $\geq 75\%$ , considerable heterogeneity. HDL-C = High-Density Lipoprotein Cholesterol, mmol/L = millimoles per liter, A = Almond, AC = Almond + Chocolate, HF = High Fat, LF = Low Fat.

173x222mm (300 x 300 DPI)

Appendix Figure 6. Forest plot of subgroup analyses for categorical variables for HDL-C.

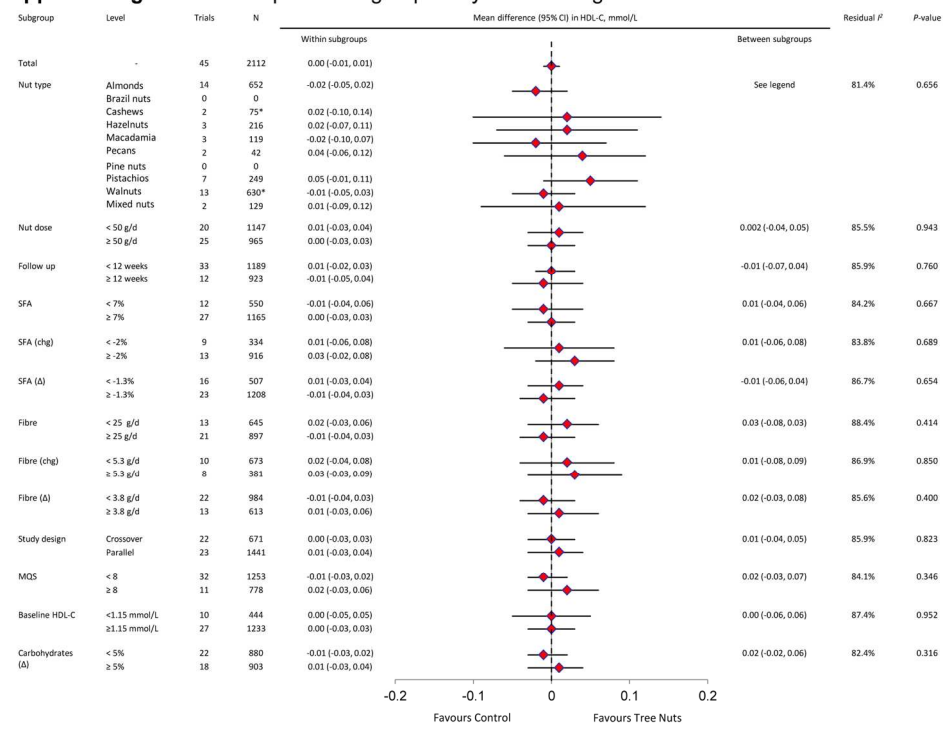

Point estimates for each subgroup level are the pooled effect estimates and are represented by diamonds. The dashed line represents the pooled effect estimate for the overall analysis. The residual I<sup>2</sup> value indicates the interstudy heterogeneity unexplained by the subgrouping. Pairwise between-subgroup mean differences (95% CIs) for nut type are not shown due to lack of statistical significance between groups. SFA = Saturated Fatty Acids, SFA (chg) = change within treatment diet for SFA, SFA (Δ) = difference between groups for SFA, Fibre (chg) = change within treatment diet for Fibre, Fibre (Δ) = difference between groups for Fibre, MQS = Heyland Methodological Quality Score, HDL-C = high-density lipoprotein cholesterol.

\* Both nut types were studied within the same trial, for the sole purposes of number of participants, the control group was divided in half.

173x190mm (300 x 300 DPI)

**Appendix Figure 7A.** Forest plot of the RCTs investigating the effect of Tree Nuts on Systolic Blood Pressure.

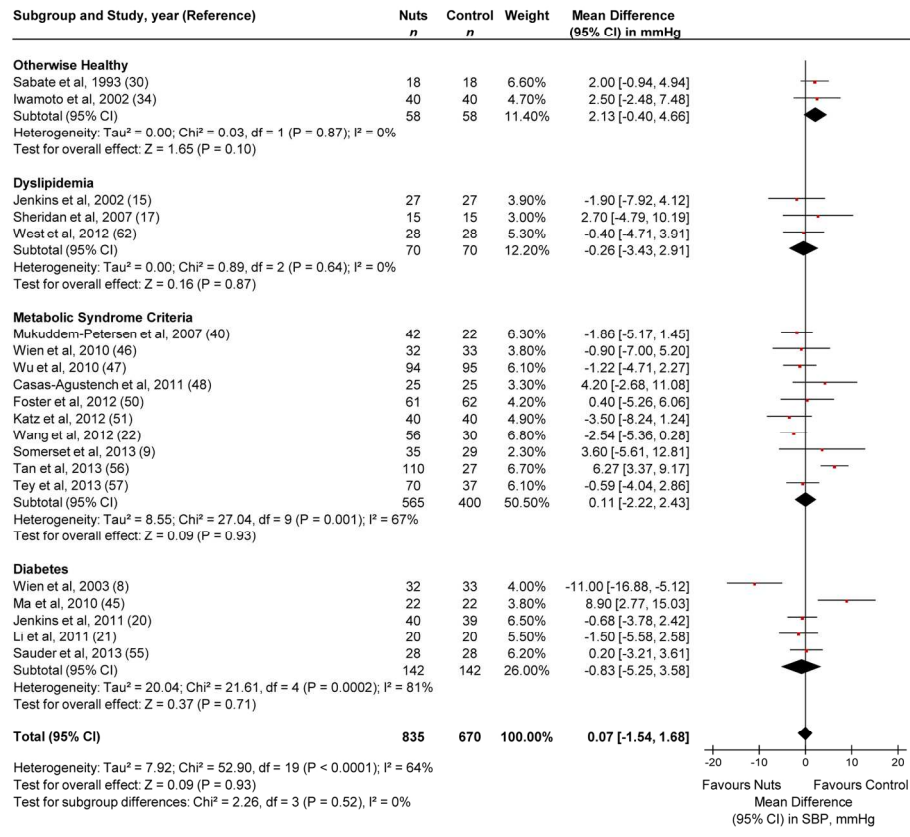

Pooled effect estimates are shown as diamonds, one each for trials conducted in otherwise healthy, dyslipidemia, metabolic syndrome criteria, diabetes and their combination (total). Paired analyses were applied to all crossover trials (9). Pooled effects are mean differences (MD) with 95% CI, using generic inverse-variance random-effects models. Interstudy heterogeneity was tested by using the Cochran's Q statistic (I<sup>2</sup>) at a significance level of P < 0.10 and quantified by I<sup>2</sup>, levels ≤ 50% represent moderate heterogeneity, ≥ 50% represent substantial heterogeneity and ≥ 75%, considerable heterogeneity. SBP = Systolic Blood Pressure, mmHg = millimeters of mercury.

173x206mm (300 x 300 DPI)

**Appendix Figure 7B.** Forest plot of the RCTs investigating the effect of Tree Nuts on Diastolic Blood Pressure.

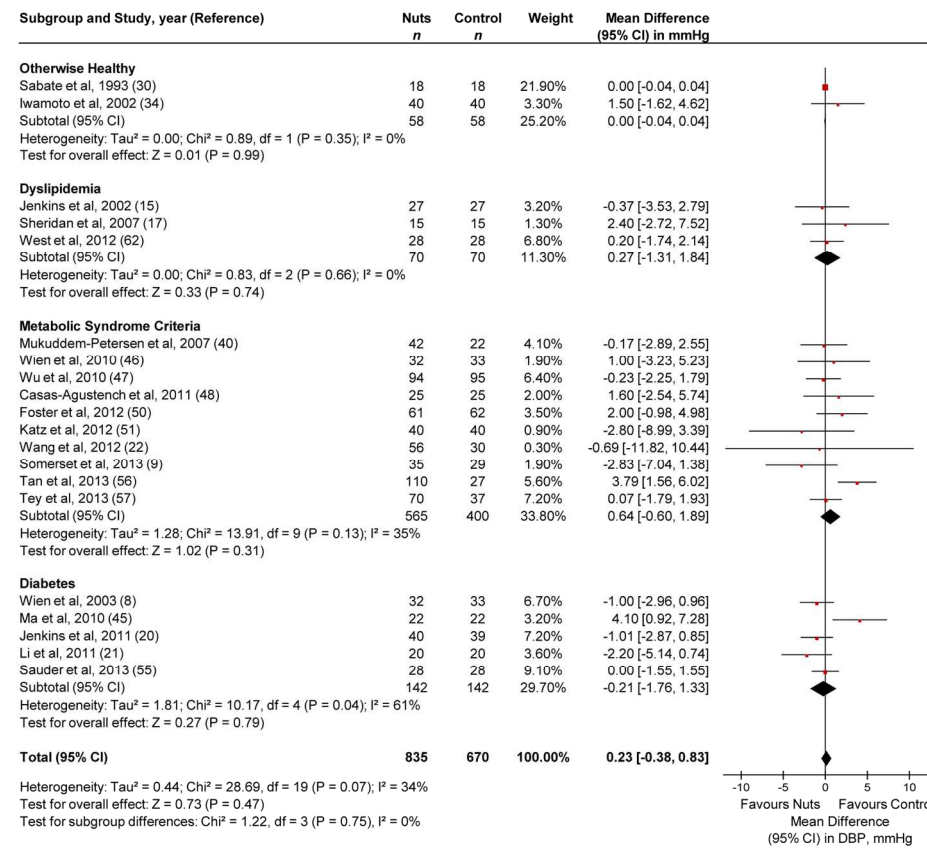

Pooled effect estimates are shown as diamonds, one each for trials conducted in otherwise healthy, dyslipidemia, metabolic syndrome criteria, diabetes and their combination (total). Paired analyses were applied to all crossover trials (9). Pooled effects are mean differences (MD) with 95% CI, using generic inverse-variance random-effects models. Interstudy heterogeneity was tested by using the Cochrane's Q statistic (I<sup>2</sup>) at a significance level of P < 0.10 and quantified by I<sup>2</sup>, levels ≤ 50% represent moderate heterogeneity, ≥ 50% representing substantial heterogeneity and ≥ 75%, considerable heterogeneity. DBP = Diastolic Blood Pressure, mmHg = millimeters of mercury.

173x197mm (300 x 300 DPI)

**Appendix Figure 8A.** Forest plot of subgroup analyses for categorical variables for Systolic Blood Pressure.

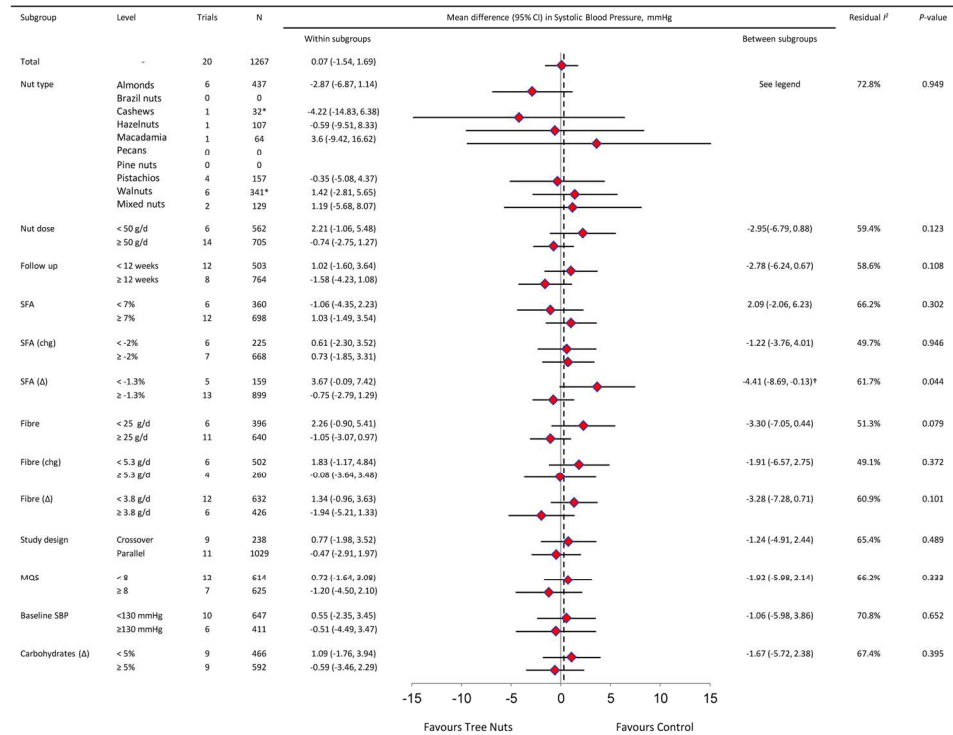

Point estimates for each subgroup level are the pooled effect estimates and are represented by diamonds. The dashed line represents the pooled effect estimate for the overall analysis. The residual  $I^2$  value indicates the interstudy heterogeneity unexplained by the subgrouping. Pairwise between-subgroup mean differences (95% CIs) for nut type are not shown due to lack of statistical significance between groups. SFA = Saturated Fatty Acids, SFA (chg) = change within treatment diet for SFA, SFA (Δ) = difference between groups for SFA, Fibre (chg) = change within treatment diet for Fibre, Fibre (Δ) = difference between groups for SFA, MQS = Heyland Methodological Quality Score, SBP = systolic blood pressure.

\* Both nut types were studied within the same trial, for the sole purposes of number of participants, the control group was divided in half.

† Statistically significant pairwise subgroup effect modification by meta-regression analysis ( $P < 0.05$ ).

173x201mm (300 x 300 DPI)

Appendix Figure 8B. Forest plot of subgroup analyses for categorical variables for Diastolic Blood Pressure.

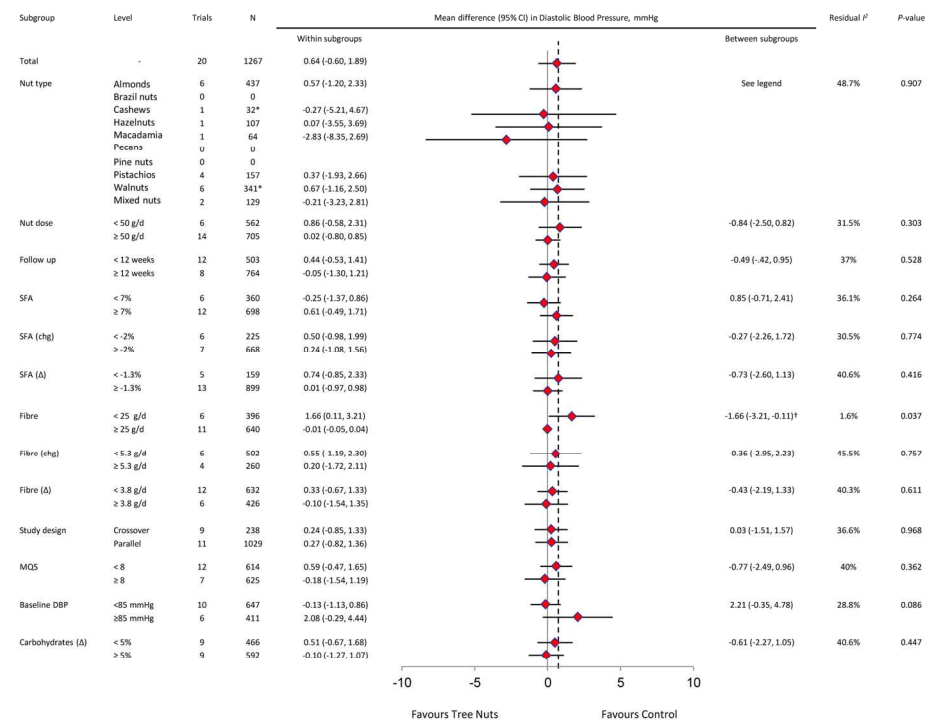

Point estimates for each subgroup level are the pooled effect estimates and are represented by diamonds. The dashed line represents the pooled effect estimate for the overall analysis. The residual I<sup>2</sup> value indicates the interstudy heterogeneity unexplained by the subgrouping. Pairwise between-subgroup mean differences (95% CIs) for nut type are not shown due to lack of statistical significance between groups. SFA = Saturated Fatty Acids, SFA (chg) = change within treatment diet for SFA, SFA (Δ) = difference between groups for SFA, Fibre (chg) = change within treatment diet for Fibre, Fibre (Δ) = difference between groups for SFA, MQS = Heyland Methodological Quality Score, DBP = diastolic blood pressure.

\* Both nut types were studied within the same trial, for the sole purposes of number of participants, the control group was divided in half.

† Statistically significant pairwise subgroup effect modification by meta-regression analysis ( $P < 0.05$ ).

173x194mm (300 x 300 DPI)



1  
2  
3  
4  
5  
6  
7  
8  
9  
10  
11  
12  
13  
14  
15  
16  
17  
18  
19  
20  
21  
22  
23  
24  
25  
26  
27  
28  
29  
30  
31  
32  
33  
34  
35  
36  
37  
38  
39  
40  
41  
42  
43  
44  
45  
46  
47  
48  
49  
50  
51  
52  
53  
54  
55  
56  
57  
58  
59  
60

**Appendix Figure 9.** Forest plot of subgroup analyses for categorical variables for Fasting Blood Glucose.

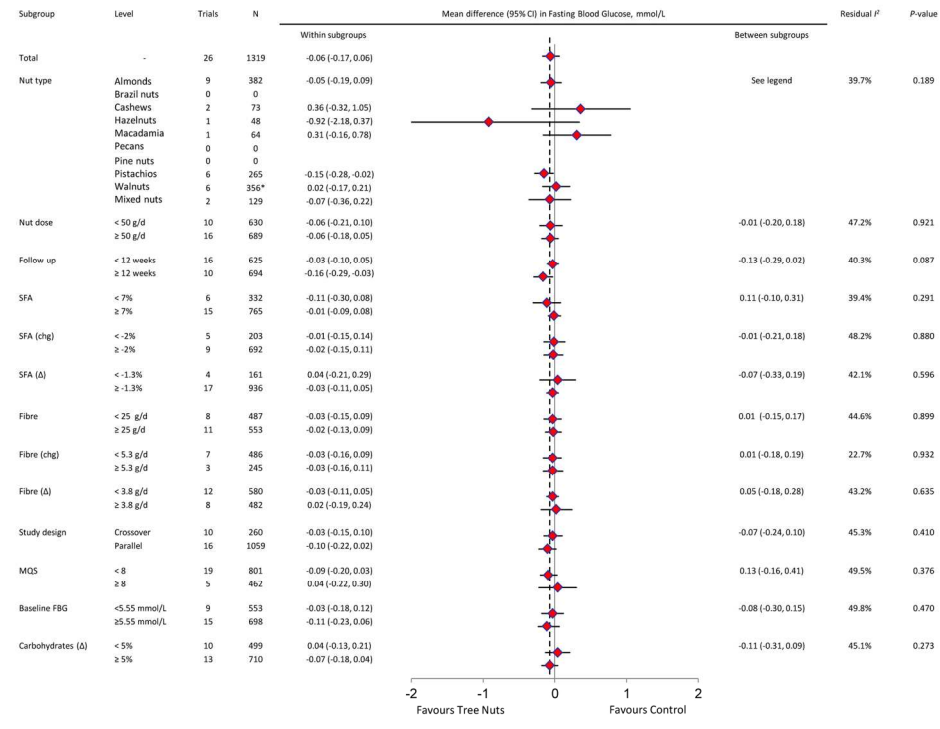

Point estimates for each subgroup level are the pooled effect estimates and are represented by diamonds. The dashed line represents the pooled effect estimate for the overall analysis. The residual I<sup>2</sup> value indicates the interstudy heterogeneity unexplained by the subgrouping. Pairwise between-subgroup mean differences (95% CIs) for nut are not shown due to lack of statistical significance. SFA = Saturated Fatty Acids, SFA (chg) = change within treatment diet for SFA, SFA (Δ) = difference between groups for SFA, Fibre (chg) = change within treatment diet for Fibre, Fibre (Δ) = difference between groups for SFA, MQS = Heyland Methodological Quality Score, FG = fasting glucose.  
\* Both nut types were studied within the same trial, for the sole purposes of number of participants, the control group was divided in half.

173x184mm (300 x 300 DPI)

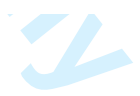



Appendix Figure 10. Funnel plots for evidence of publication bias.

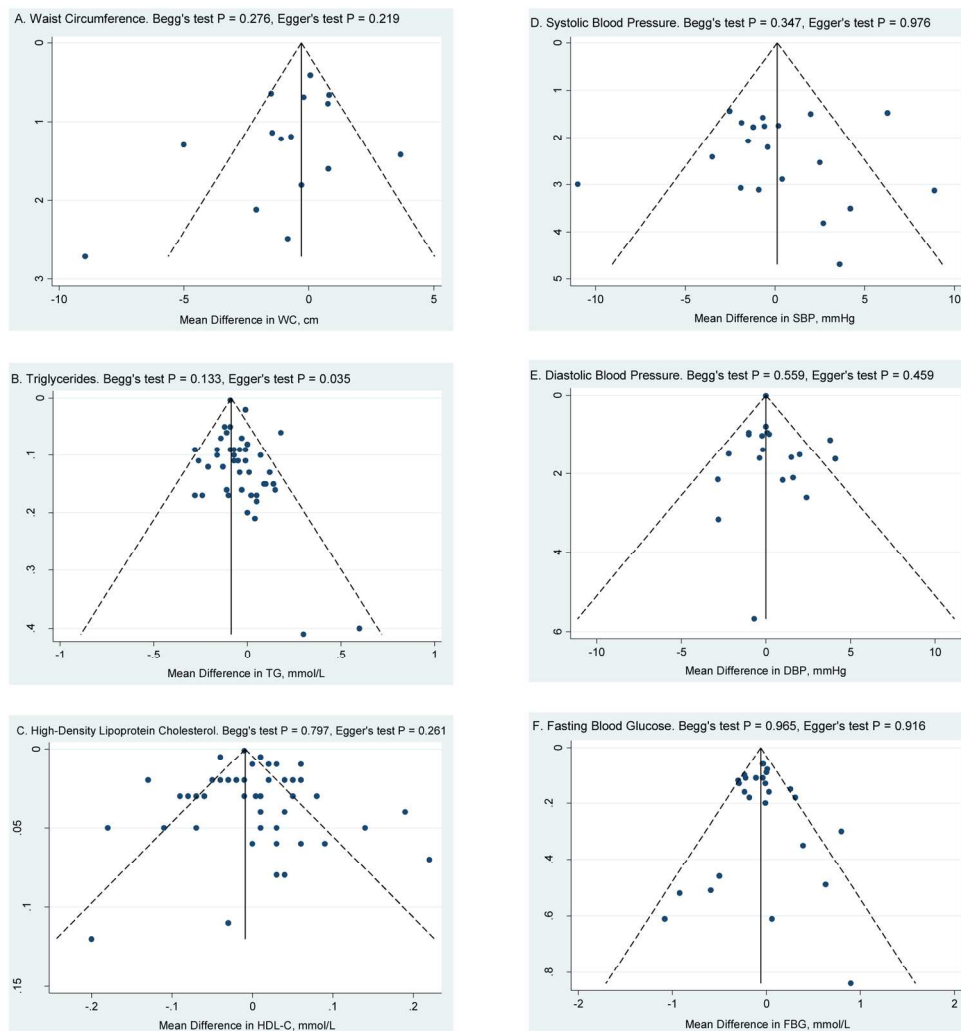

173x197mm (300 x 300 DPI)



# PRISMA 2009 Checklist

| Section/topic                      | #  | Checklist item                                                                                                                                                                                                                                                                                              | Reported on page # |
|------------------------------------|----|-------------------------------------------------------------------------------------------------------------------------------------------------------------------------------------------------------------------------------------------------------------------------------------------------------------|--------------------|
| <b>TITLE</b>                       |    |                                                                                                                                                                                                                                                                                                             |                    |
| Title                              | 1  | Identify the report as a systematic review, meta-analysis, or both.                                                                                                                                                                                                                                         | 1                  |
| <b>ABSTRACT</b>                    |    |                                                                                                                                                                                                                                                                                                             |                    |
| Structured summary                 | 2  | Provide a structured summary including, as applicable: background; objectives; data sources; study eligibility criteria, participants, and interventions; study appraisal and synthesis methods; results; limitations; conclusions and implications of key findings; systematic review registration number. | 2                  |
| <b>INTRODUCTION</b>                |    |                                                                                                                                                                                                                                                                                                             |                    |
| Rationale                          | 3  | Describe the rationale for the review in the context of what is already known.                                                                                                                                                                                                                              | 3                  |
| Objectives                         | 4  | Provide an explicit statement of questions being addressed with reference to participants, interventions, comparisons, outcomes, and study design (PICOS).                                                                                                                                                  | 3                  |
| <b>METHODS</b>                     |    |                                                                                                                                                                                                                                                                                                             |                    |
| Protocol and registration          | 5  | Indicate if a review protocol exists, if and where it can be accessed (e.g., Web address), and, if available, provide registration information including registration number.                                                                                                                               | 4                  |
| Eligibility criteria               | 6  | Specify study characteristics (e.g., PICOS, length of follow-up) and report characteristics (e.g., years considered, language, publication status) used as criteria for eligibility, giving rationale.                                                                                                      | 4                  |
| Information sources                | 7  | Describe all information sources (e.g., databases with dates of coverage, contact with study authors to identify additional studies) in the search and date last searched.                                                                                                                                  | 4                  |
| Search                             | 8  | Present full electronic search strategy for at least one database, including any limits used, such that it could be repeated.                                                                                                                                                                               | 4                  |
| Study selection                    | 9  | State the process for selecting studies (i.e., screening, eligibility, included in systematic review, and, if applicable, included in the meta-analysis).                                                                                                                                                   | 4                  |
| Data collection process            | 10 | Describe method of data extraction from reports (e.g., piloted forms, independently, in duplicate) and any processes for obtaining and confirming data from investigators.                                                                                                                                  | 5                  |
| Data items                         | 11 | List and define all variables for which data were sought (e.g., PICOS, funding sources) and any assumptions and simplifications made.                                                                                                                                                                       | 5                  |
| Risk of bias in individual studies | 12 | Describe methods used for assessing risk of bias of individual studies (including specification of whether this was done at the study or outcome level), and how this information is to be used in any data synthesis.                                                                                      | 5                  |
| Summary measures                   | 13 | State the principal summary measures (e.g., risk ratio, difference in means).                                                                                                                                                                                                                               | 6                  |
| Synthesis of results               | 14 | Describe the methods of handling data and combining results of studies, if done, including measures of consistency (e.g., $I^2$ for each meta-analysis).                                                                                                                                                    | 6                  |



# PRISMA 2009 Checklist

Page 1 of 2

| Section/topic                 | #  | Checklist item                                                                                                                                                                                           | Reported on page # |
|-------------------------------|----|----------------------------------------------------------------------------------------------------------------------------------------------------------------------------------------------------------|--------------------|
| Risk of bias across studies   | 15 | Specify any assessment of risk of bias that may affect the cumulative evidence (e.g., publication bias, selective reporting within studies).                                                             | 6                  |
| Additional analyses           | 16 | Describe methods of additional analyses (e.g., sensitivity or subgroup analyses, meta-regression), if done, indicating which were pre-specified.                                                         | 7                  |
| <b>RESULTS</b>                |    |                                                                                                                                                                                                          |                    |
| Study selection               | 17 | Give numbers of studies screened, assessed for eligibility, and included in the review, with reasons for exclusions at each stage, ideally with a flow diagram.                                          | 7                  |
| Study characteristics         | 18 | For each study, present characteristics for which data were extracted (e.g., study size, PICOS, follow-up period) and provide the citations.                                                             | 8                  |
| Risk of bias within studies   | 19 | Present data on risk of bias of each study and, if available, any outcome level assessment (see item 12).                                                                                                | 9                  |
| Results of individual studies | 20 | For all outcomes considered (benefits or harms), present, for each study: (a) simple summary data for each intervention group (b) effect estimates and confidence intervals, ideally with a forest plot. | 9                  |
| Synthesis of results          | 21 | Present results of each meta-analysis done, including confidence intervals and measures of consistency.                                                                                                  | 9                  |
| Risk of bias across studies   | 22 | Present results of any assessment of risk of bias across studies (see Item 15).                                                                                                                          | 12                 |
| Additional analysis           | 23 | Give results of additional analyses, if done (e.g., sensitivity or subgroup analyses, meta-regression [see Item 16]).                                                                                    | 9                  |
| <b>DISCUSSION</b>             |    |                                                                                                                                                                                                          |                    |
| Summary of evidence           | 24 | Summarize the main findings including the strength of evidence for each main outcome; consider their relevance to key groups (e.g., healthcare providers, users, and policy makers).                     | 12                 |
| Limitations                   | 25 | Discuss limitations at study and outcome level (e.g., risk of bias), and at review-level (e.g., incomplete retrieval of identified research, reporting bias).                                            | 15                 |
| Conclusions                   | 26 | Provide a general interpretation of the results in the context of other evidence, and implications for future research.                                                                                  | 16                 |
| <b>FUNDING</b>                |    |                                                                                                                                                                                                          |                    |
| Funding                       | 27 | Describe sources of funding for the systematic review and other support (e.g., supply of data); role of funders for the systematic review.                                                               | 16                 |

From: Moher D, Liberati A, Tetzlaff J, Altman DG, The PRISMA Group (2009). Preferred Reporting Items for Systematic Reviews and Meta-Analyses: The PRISMA Statement. PLoS Med 6(6): e1000097. doi:10.1371/journal.pmed1000097

For more information, visit: [www.prisma-statement.org](http://www.prisma-statement.org).

Page 2 of 2

For peer review only - <http://bmjopen.bmj.com/site/about/guidelines.xhtml>
